# Supplementary material for: Causal Effects of AL Amyloidosis on Autoimmune Diseases and the Role of Inflammatory Cytokines: Insights from Mendelian Randomization
Source: Research Square preprint supplement (doi:10.21203/rs.3.rs-7503974/v1), 2025-10-15
Supplement: Supplementary file 1 [file 2454de40a1b087e1a86f5b53.xlsx]

## Sheet: Robustness analysis
Robustness Analysis of Mendelian Randomization for AL Amyloidosis Across Four Screened Autoimmune Diseases
Outcome	Exposure	Heterogeneity test				Pleiotropy test			MR-PRESSO
		Method	Q	Q_df	Q_pval	Egger_intercept	se	pval	Global Test	pval
Autoimmune diseases || id:finn-b-AUTOIMMUNE	AL amyloidosis	MR Egger	7.808	5	0.16714	0.00189584	0.0359419	0.959976	10.2036	0.327
		Inverse variance weighted	7.81234	6	0.252177
Coeliac disease || id:finn-b-K11_COELIAC		MR Egger	1.94748	5	0.856364	0.0245746	0.110303	0.832513	2.81929	0.929333
		Inverse variance weighted	1.99711	6	0.919964
Ulcerative colitis || id:ebi-a-GCST004133		MR Egger	2.38697	3	0.496064	-0.0711472	0.0559235	0.292952	6.47236	0.499333
		Inverse variance weighted	4.00552	4	0.405259
Inflammatory bowel disease || id:ebi-a-GCST004131		MR Egger	4.09721	3	0.251156	-0.0692005	0.0513333	0.270391	10.4329	0.255
		Inverse variance weighted	6.57913	4	0.159872
