# Supplementary material for: Causal Effects of AL Amyloidosis on Autoimmune Diseases and the Role of Inflammatory Cytokines: Insights from Mendelian Randomization
Source: Research Square preprint supplement (doi:10.21203/rs.3.rs-7503974/v1), 2025-10-15
Supplement: Supplementary file 1 [file b7291748eac8d21f6e871f19.pdf]

Supplementary Figure 1

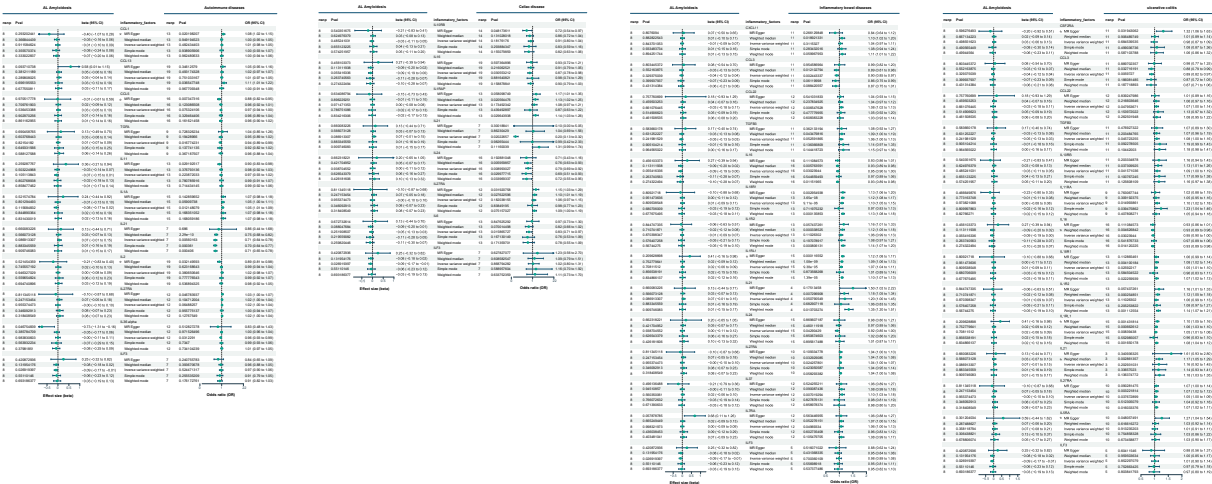

Supplementary Figure 1. Forest plots showing the causal effects of 77 Inflammatory Cytokines on Universal ADs, Celiac Disease, IBD, and UC. The odds ratio (OR) is depicted for dichotomous traits, with the dot representing the estimated OR and the horizontal bar indicating the 95% confidence interval (CI). A P value (Pval) <0.05 is considered statistically significant.
