# Supplementary material for: Causal Effects of AL Amyloidosis on Autoimmune Diseases and the Role of Inflammatory Cytokines: Insights from Mendelian Randomization
Source: Research Square preprint supplement (doi:10.21203/rs.3.rs-7503974/v1), 2025-10-15
Supplement: Supplementary file 2 [file 4143f400b696bdbef636a972.xlsx]

## Sheet:  pQTL Datasets
Detailed Information of pQTL Datasets
GWAS ID	Year	Trait	Trait_abb	Sample size	Number of SNPs
prot-a-680	2018	Macrophage colony-stimulating factor 1	MCSF	3301	10534735
prot-a-685	2018	Granulocyte colony-stimulating factor	GCSF	3301	10534735
prot-a-686	2018	Granulocyte colony-stimulating factor receptor	GCSFR	3301	10534735
prot-a-681	2018	Granulocyte-macrophage colony-stimulating factor	GM-CSF	3301	10534735
prot-a-682	2018	Granulocyte-macrophage colony-stimulating factor receptor subunit alpha	CSF2RA	3301	10534735
prot-a-738	2018	C-X-C motif chemokine 10	CXCL10	3301	10534735
prot-a-739	2018	C-X-C motif chemokine 11	CXCL11	3301	10534735
prot-a-748	2018	C-X-C motif chemokine 5	CXCL5	3301	10534735
prot-a-743	2018	C-X-C motif chemokine 13	CXCL13	3301	10534735
prot-a-744	2018	C-X-C motif chemokine 14	CXCL14	3301	10534735
prot-a-750	2018	C-X-C motif chemokine 9	CXCL9	3301	10534735
prot-a-745	2018	C-X-C motif chemokine 16	CXCL16	3301	10534735
prot-a-388	2018	C-C motif chemokine 1	CCL1	3301	10534735
prot-a-389	2018	C-C motif chemokine 13	CCL13	3301	10534735
prot-a-394	2018	C-C motif chemokine 17	CCL17	3301	10534735
prot-a-407	2018	C-C motif chemokine 3	CCL3	3301	10534735
prot-a-396	2018	C-C motif chemokine 20	CCL20	3301	10534735
prot-a-398	2018	C-C motif chemokine 22	CCL22	3301	10534735
prot-a-409	2018	C-C motif chemokine 5	CCL5	3301	10534735
prot-a-410	2018	C-C motif chemokine 7	CCL7	3301	10534735
prot-a-411	2018	C-C motif chemokine 8	CCL8	3301	10534735
prot-a-2961	2018	Transforming growth factor alpha	TGFA	3301	10534735
prot-a-2962	2018	Transforming growth factor beta-1	TGFB1	3301	10534735
prot-a-2964	2018	Transforming growth factor beta-2	TGFB2	3301	10534735
prot-a-2965	2018	Transforming growth factor beta-3	TGFB3	3301	10534735
prot-a-1464	2018	Interleukin-10	IL10	3301	10534735
prot-a-1465	2018	Interleukin-10 receptor subunit beta	IL10RB	3301	10534735
prot-a-1466	2018	Interleukin-11	IL11	3301	10534735
prot-a-1467	2018	Interleukin-11 receptor subunit alpha	IL11RA	3301	10534735
prot-a-1468	2018	Interleukin-12	IL12	3301	10534735
prot-a-1471	2018	Interleukin-23	IL23	3301	10534735
prot-a-1475	2018	Interleukin-13	IL13	3301	10534735
prot-a-1479	2018	Interleukin-16	IL16	3301	10534735
prot-a-1490	2018	Interleukin-18-binding protein	IL18BP	3301	10534735
prot-a-1491	2018	Interleukin-18 receptor 1	IL18R1	3301	10534735
prot-a-1493	2018	Interleukin-19	IL19	3301	10534735
prot-a-1494	2018	Interleukin-1 alpha	IL1A	3301	10534735
prot-a-1495	2018	Interleukin-1 beta	IL1B	3301	10534735
prot-a-1496	2018	Interleukin-1 receptor type 1	IL1R1	3301	10534735
prot-a-1497	2018	Interleukin-1 receptor type 2	IL1R2	3301	10534735
prot-a-1499	2018	Interleukin-1 Receptor accessory protein	IL1RAP	3301	10534735
prot-a-1501	2018	X-linked interleukin-1 receptor accessory protein-like 2	IL1RAPL2	3301	10534735
prot-a-1502	2018	Interleukin-1 receptor-like 1	IL1RL1	3301	10534735
prot-a-1503	2018	Interleukin-1 receptor-like 2	IL1RL2	3301	10534735
prot-a-1504	2018	Interleukin-1 receptor antagonist protein	IL1RN	3301	10534735
prot-a-1505	2018	Interleukin-20	IL20	3301	10534735
prot-a-1506	2018	Interleukin-21	IL21	3301	10534735
prot-a-1507	2018	Interleukin-22	IL22	3301	10534735
prot-a-1512	2018	Interleukin-2	IL2	3301	10534735
prot-a-1514	2018	Interleukin-24	IL24	3301	10534735
prot-a-1515	2018	Interleukin-25	IL25	3301	10534735
prot-a-1516	2018	Interleukin-27	IL27	3301	10534735
prot-a-1517	2018	Interleukin-27 receptor subunit alpha	IL27RA	3301	10534735
prot-a-1518	2018	Interleukin-2 receptor subunit alpha	IL2RA	3301	10534735
prot-a-1519	2018	Interleukin-2 receptor subunit beta	IL2RB	3301	10534735
prot-a-1521	2018	Interleukin-31	IL31	3301	10534735
prot-a-1523	2018	Interleukin-32	IL32	3301	10534735
prot-a-1524	2018	Interleukin-34	IL34	3301	10534735
prot-a-1525	2018	Interleukin-3	IL3	3301	10534735
prot-a-1526	2018	Interleukin-36 alpha	IL36 alpha	3301	10534735
prot-a-1527	2018	Interleukin-36 beta	IL36 beta	3301	10534735
prot-a-1528	2018	Interleukin-36 gamma	IL36 gamma	3301	10534735
prot-a-1529	2018	Interleukin-37	IL37	3301	10534735
prot-a-1530	2018	Interleukin-3 receptor subunit alpha	IL3RA	3301	10534735
prot-a-1532	2018	Interleukin-4	IL4	3301	10534735
prot-a-1533	2018	Interleukin-4 receptor subunit alpha	IL4RA	3301	10534735
prot-a-1534	2018	Interleukin-5	IL5	3301	10534735
prot-a-1536	2018	Interleukin-5 receptor subunit alpha	IL5RA	3301	10534735
prot-a-1538	2018	Interleukin-6	IL6	3301	10534735
prot-a-1540	2018	Interleukin-6 receptor subunit alpha	IL6RA	3301	10534735
prot-a-1542	2018	Interleukin-6 receptor subunit beta	IL6RB	3301	10534735
prot-a-1543	2018	Interleukin-7	IL7	3301	10534735
prot-a-1544	2018	Interleukin-7 receptor subunit alpha	IL7RA	3301	10534735
prot-a-1545	2018	Interleukin-9	IL9	3301	10534735
prot-a-749	2018	Interleukin-8	IL8	3301	10534735
prot-a-1547	2018	Interleukin enhancer-binding factor 3	ILF3	3301	10534735
prot-a-2982	2018	Toll/interleukin-1 receptor domain-containing adapter protein	TIRAP	3301	10534735

## Sheet: infla_heterogeneity
id.exposure	id.outcome	outcome	exposure	method	Q	Q_df	Q_pval
prot-a-2982	ebi-a-GCST004133	Ulcerative colitis || id:ebi-a-GCST004133	TIRAP	MR Egger	6.21075	11	0.858939
prot-a-2982	ebi-a-GCST004133	Ulcerative colitis || id:ebi-a-GCST004133	TIRAP	Inverse variance weighted	7.33675	12	0.834581
prot-a-1547	ebi-a-GCST004133	Ulcerative colitis || id:ebi-a-GCST004133	ILF3	MR Egger	1.06174	3	0.786318
prot-a-1547	ebi-a-GCST004133	Ulcerative colitis || id:ebi-a-GCST004133	ILF3	Inverse variance weighted	1.49012	4	0.828391
prot-a-749	ebi-a-GCST004133	Ulcerative colitis || id:ebi-a-GCST004133	IL8	MR Egger	20.8117	13	0.0767383
prot-a-749	ebi-a-GCST004133	Ulcerative colitis || id:ebi-a-GCST004133	IL8	Inverse variance weighted	21.9891	14	0.0788379
prot-a-1545	ebi-a-GCST004133	Ulcerative colitis || id:ebi-a-GCST004133	IL9	MR Egger	6.42014	8	0.600278
prot-a-1545	ebi-a-GCST004133	Ulcerative colitis || id:ebi-a-GCST004133	IL9	Inverse variance weighted	6.44833	9	0.694343
prot-a-1544	ebi-a-GCST004133	Ulcerative colitis || id:ebi-a-GCST004133	IL7RA	MR Egger	10.5732	10	0.39172
prot-a-1544	ebi-a-GCST004133	Ulcerative colitis || id:ebi-a-GCST004133	IL7RA	Inverse variance weighted	10.6174	11	0.475848
prot-a-1543	ebi-a-GCST004133	Ulcerative colitis || id:ebi-a-GCST004133	IL7	MR Egger	10.6797	12	0.556551
prot-a-1543	ebi-a-GCST004133	Ulcerative colitis || id:ebi-a-GCST004133	IL7	Inverse variance weighted	12.8782	13	0.457265
prot-a-1542	ebi-a-GCST004133	Ulcerative colitis || id:ebi-a-GCST004133	IL6RB	MR Egger	5.87424	8	0.661317
prot-a-1542	ebi-a-GCST004133	Ulcerative colitis || id:ebi-a-GCST004133	IL6RB	Inverse variance weighted	5.92174	9	0.747725
prot-a-1540	ebi-a-GCST004133	Ulcerative colitis || id:ebi-a-GCST004133	IL6RA	MR Egger	20.793	7	0.00408887
prot-a-1540	ebi-a-GCST004133	Ulcerative colitis || id:ebi-a-GCST004133	IL6RA	Inverse variance weighted	39.5333	8	3.91304e-06
prot-a-1538	ebi-a-GCST004133	Ulcerative colitis || id:ebi-a-GCST004133	IL6	MR Egger	24.5814	10	0.00619811
prot-a-1538	ebi-a-GCST004133	Ulcerative colitis || id:ebi-a-GCST004133	IL6	Inverse variance weighted	24.7701	11	0.00984983
prot-a-1536	ebi-a-GCST004133	Ulcerative colitis || id:ebi-a-GCST004133	IL5RA	MR Egger	7.91856	8	0.441466
prot-a-1536	ebi-a-GCST004133	Ulcerative colitis || id:ebi-a-GCST004133	IL5RA	Inverse variance weighted	14.0712	9	0.119815
prot-a-1534	ebi-a-GCST004133	Ulcerative colitis || id:ebi-a-GCST004133	IL5	MR Egger	10.1224	7	0.181741
prot-a-1534	ebi-a-GCST004133	Ulcerative colitis || id:ebi-a-GCST004133	IL5	Inverse variance weighted	11.9214	8	0.154744
prot-a-1533	ebi-a-GCST004133	Ulcerative colitis || id:ebi-a-GCST004133	IL4RA	MR Egger	15.4077	9	0.0803284
prot-a-1533	ebi-a-GCST004133	Ulcerative colitis || id:ebi-a-GCST004133	IL4RA	Inverse variance weighted	15.4281	10	0.117214
prot-a-1532	ebi-a-GCST004133	Ulcerative colitis || id:ebi-a-GCST004133	IL4	MR Egger	15.717	13	0.264748
prot-a-1532	ebi-a-GCST004133	Ulcerative colitis || id:ebi-a-GCST004133	IL4	Inverse variance weighted	15.7177	14	0.330914
prot-a-1530	ebi-a-GCST004133	Ulcerative colitis || id:ebi-a-GCST004133	IL3RA	MR Egger	19.489	9	0.0213419
prot-a-1530	ebi-a-GCST004133	Ulcerative colitis || id:ebi-a-GCST004133	IL3RA	Inverse variance weighted	20.2995	10	0.026544
prot-a-1529	ebi-a-GCST004133	Ulcerative colitis || id:ebi-a-GCST004133	IL37	MR Egger	13.7853	10	0.183011
prot-a-1529	ebi-a-GCST004133	Ulcerative colitis || id:ebi-a-GCST004133	IL37	Inverse variance weighted	14.0992	11	0.227553
prot-a-1528	ebi-a-GCST004133	Ulcerative colitis || id:ebi-a-GCST004133	IL36 gamma	MR Egger	10.4901	6	0.105472
prot-a-1528	ebi-a-GCST004133	Ulcerative colitis || id:ebi-a-GCST004133	IL36 gamma	Inverse variance weighted	11.2203	7	0.129294
prot-a-1527	ebi-a-GCST004133	Ulcerative colitis || id:ebi-a-GCST004133	IL36 beta	MR Egger	11.4336	12	0.492169
prot-a-1527	ebi-a-GCST004133	Ulcerative colitis || id:ebi-a-GCST004133	IL36 beta	Inverse variance weighted	12.6204	13	0.477544
prot-a-1526	ebi-a-GCST004133	Ulcerative colitis || id:ebi-a-GCST004133	IL36 alpha	MR Egger	10.6594	7	0.154183
prot-a-1526	ebi-a-GCST004133	Ulcerative colitis || id:ebi-a-GCST004133	IL36 alpha	Inverse variance weighted	13.8534	8	0.085667
prot-a-1525	ebi-a-GCST004133	Ulcerative colitis || id:ebi-a-GCST004133	IL3	MR Egger	6.61069	7	0.470507
prot-a-1525	ebi-a-GCST004133	Ulcerative colitis || id:ebi-a-GCST004133	IL3	Inverse variance weighted	6.61556	8	0.57862
prot-a-1524	ebi-a-GCST004133	Ulcerative colitis || id:ebi-a-GCST004133	IL34	MR Egger	13.3968	11	0.268181
prot-a-1524	ebi-a-GCST004133	Ulcerative colitis || id:ebi-a-GCST004133	IL34	Inverse variance weighted	14.9074	12	0.246538
prot-a-1523	ebi-a-GCST004133	Ulcerative colitis || id:ebi-a-GCST004133	IL32	MR Egger	12.2899	10	0.266122
prot-a-1523	ebi-a-GCST004133	Ulcerative colitis || id:ebi-a-GCST004133	IL32	Inverse variance weighted	12.4534	11	0.330544
prot-a-1521	ebi-a-GCST004133	Ulcerative colitis || id:ebi-a-GCST004133	IL31	MR Egger	10.715	9	0.295752
prot-a-1521	ebi-a-GCST004133	Ulcerative colitis || id:ebi-a-GCST004133	IL31	Inverse variance weighted	10.715	10	0.380147
prot-a-1519	ebi-a-GCST004133	Ulcerative colitis || id:ebi-a-GCST004133	IL2RB	MR Egger	29.4637	10	0.00104781
prot-a-1519	ebi-a-GCST004133	Ulcerative colitis || id:ebi-a-GCST004133	IL2RB	Inverse variance weighted	32.0885	11	0.000738195
prot-a-1518	ebi-a-GCST004133	Ulcerative colitis || id:ebi-a-GCST004133	IL2RA	MR Egger	8.17929	5	0.146628
prot-a-1518	ebi-a-GCST004133	Ulcerative colitis || id:ebi-a-GCST004133	IL2RA	Inverse variance weighted	8.34345	6	0.214006
prot-a-1517	ebi-a-GCST004133	Ulcerative colitis || id:ebi-a-GCST004133	IL27RA	MR Egger	8.94222	8	0.347194
prot-a-1517	ebi-a-GCST004133	Ulcerative colitis || id:ebi-a-GCST004133	IL27RA	Inverse variance weighted	9.57699	9	0.385802
prot-a-1516	ebi-a-GCST004133	Ulcerative colitis || id:ebi-a-GCST004133	IL27	MR Egger	32.7801	15	0.00503383
prot-a-1516	ebi-a-GCST004133	Ulcerative colitis || id:ebi-a-GCST004133	IL27	Inverse variance weighted	35.2388	16	0.00368576
prot-a-1515	ebi-a-GCST004133	Ulcerative colitis || id:ebi-a-GCST004133	IL25	MR Egger	12.7497	13	0.46733
prot-a-1515	ebi-a-GCST004133	Ulcerative colitis || id:ebi-a-GCST004133	IL25	Inverse variance weighted	16.3649	14	0.291602
prot-a-1514	ebi-a-GCST004133	Ulcerative colitis || id:ebi-a-GCST004133	IL24	MR Egger	21.903	13	0.0568837
prot-a-1514	ebi-a-GCST004133	Ulcerative colitis || id:ebi-a-GCST004133	IL24	Inverse variance weighted	22.7181	14	0.0650134
prot-a-1512	ebi-a-GCST004133	Ulcerative colitis || id:ebi-a-GCST004133	IL2	MR Egger	12.5396	13	0.483967
prot-a-1512	ebi-a-GCST004133	Ulcerative colitis || id:ebi-a-GCST004133	IL2	Inverse variance weighted	13.5833	14	0.481194
prot-a-1507	ebi-a-GCST004133	Ulcerative colitis || id:ebi-a-GCST004133	IL22	MR Egger	7.51227	11	0.756212
prot-a-1507	ebi-a-GCST004133	Ulcerative colitis || id:ebi-a-GCST004133	IL22	Inverse variance weighted	9.34832	12	0.672926
prot-a-1506	ebi-a-GCST004133	Ulcerative colitis || id:ebi-a-GCST004133	IL21	MR Egger	31.4462	11	0.000935358
prot-a-1506	ebi-a-GCST004133	Ulcerative colitis || id:ebi-a-GCST004133	IL21	Inverse variance weighted	33.5655	12	0.000789542
prot-a-1505	ebi-a-GCST004133	Ulcerative colitis || id:ebi-a-GCST004133	IL20	MR Egger	2.88448	3	0.409781
prot-a-1505	ebi-a-GCST004133	Ulcerative colitis || id:ebi-a-GCST004133	IL20	Inverse variance weighted	2.90533	4	0.57379
prot-a-1504	ebi-a-GCST004133	Ulcerative colitis || id:ebi-a-GCST004133	IL1RN	MR Egger	16.5973	9	0.0554095
prot-a-1504	ebi-a-GCST004133	Ulcerative colitis || id:ebi-a-GCST004133	IL1RN	Inverse variance weighted	16.6479	10	0.0825282
prot-a-1503	ebi-a-GCST004133	Ulcerative colitis || id:ebi-a-GCST004133	IL1RL2	MR Egger	8.56297	7	0.285573
prot-a-1503	ebi-a-GCST004133	Ulcerative colitis || id:ebi-a-GCST004133	IL1RL2	Inverse variance weighted	9.69364	8	0.28719
prot-a-1502	ebi-a-GCST004133	Ulcerative colitis || id:ebi-a-GCST004133	IL1RL1	MR Egger	7.25289	13	0.888653
prot-a-1502	ebi-a-GCST004133	Ulcerative colitis || id:ebi-a-GCST004133	IL1RL1	Inverse variance weighted	15.7092	14	0.331455
prot-a-1501	ebi-a-GCST004133	Ulcerative colitis || id:ebi-a-GCST004133	IL1RAPL2	MR Egger	8.22007	10	0.60735
prot-a-1501	ebi-a-GCST004133	Ulcerative colitis || id:ebi-a-GCST004133	IL1RAPL2	Inverse variance weighted	8.22049	11	0.693427
prot-a-1499	ebi-a-GCST004133	Ulcerative colitis || id:ebi-a-GCST004133	IL1RAP	MR Egger	10.0169	12	0.614477
prot-a-1499	ebi-a-GCST004133	Ulcerative colitis || id:ebi-a-GCST004133	IL1RAP	Inverse variance weighted	10.0195	13	0.692341
prot-a-1497	ebi-a-GCST004133	Ulcerative colitis || id:ebi-a-GCST004133	IL1R2	MR Egger	31.4437	11	0.000936232
prot-a-1497	ebi-a-GCST004133	Ulcerative colitis || id:ebi-a-GCST004133	IL1R2	Inverse variance weighted	34.1907	12	0.000629362
prot-a-1496	ebi-a-GCST004133	Ulcerative colitis || id:ebi-a-GCST004133	IL1R1	MR Egger	14.0541	14	0.445687
prot-a-1496	ebi-a-GCST004133	Ulcerative colitis || id:ebi-a-GCST004133	IL1R1	Inverse variance weighted	15.6522	15	0.405534
prot-a-1495	ebi-a-GCST004133	Ulcerative colitis || id:ebi-a-GCST004133	IL1B	MR Egger	13.3222	7	0.0646374
prot-a-1495	ebi-a-GCST004133	Ulcerative colitis || id:ebi-a-GCST004133	IL1B	Inverse variance weighted	13.5877	8	0.0931643
prot-a-1494	ebi-a-GCST004133	Ulcerative colitis || id:ebi-a-GCST004133	IL1A	MR Egger	14.3277	13	0.351177
prot-a-1494	ebi-a-GCST004133	Ulcerative colitis || id:ebi-a-GCST004133	IL1A	Inverse variance weighted	14.5199	14	0.411739
prot-a-1493	ebi-a-GCST004133	Ulcerative colitis || id:ebi-a-GCST004133	IL19	MR Egger	14.7448	10	0.141646
prot-a-1493	ebi-a-GCST004133	Ulcerative colitis || id:ebi-a-GCST004133	IL19	Inverse variance weighted	15.1914	11	0.173901
prot-a-1491	ebi-a-GCST004133	Ulcerative colitis || id:ebi-a-GCST004133	IL18R1	MR Egger	12.1975	11	0.34898
prot-a-1491	ebi-a-GCST004133	Ulcerative colitis || id:ebi-a-GCST004133	IL18R1	Inverse variance weighted	12.3935	12	0.414614
prot-a-1490	ebi-a-GCST004133	Ulcerative colitis || id:ebi-a-GCST004133	IL18BP	MR Egger	13.8881	9	0.126361
prot-a-1490	ebi-a-GCST004133	Ulcerative colitis || id:ebi-a-GCST004133	IL18BP	Inverse variance weighted	16.9756	10	0.0749053
prot-a-1479	ebi-a-GCST004133	Ulcerative colitis || id:ebi-a-GCST004133	IL16	MR Egger	27.6595	14	0.0157825
prot-a-1479	ebi-a-GCST004133	Ulcerative colitis || id:ebi-a-GCST004133	IL16	Inverse variance weighted	27.9575	15	0.0218369
prot-a-1475	ebi-a-GCST004133	Ulcerative colitis || id:ebi-a-GCST004133	IL13	MR Egger	11.1283	11	0.432579
prot-a-1475	ebi-a-GCST004133	Ulcerative colitis || id:ebi-a-GCST004133	IL13	Inverse variance weighted	12.0414	12	0.442362
prot-a-1471	ebi-a-GCST004133	Ulcerative colitis || id:ebi-a-GCST004133	IL23	MR Egger	74.8177	12	3.97756e-11
prot-a-1471	ebi-a-GCST004133	Ulcerative colitis || id:ebi-a-GCST004133	IL23	Inverse variance weighted	81.9323	13	4.77053e-12
prot-a-1468	ebi-a-GCST004133	Ulcerative colitis || id:ebi-a-GCST004133	IL12	MR Egger	12.8452	11	0.303565
prot-a-1468	ebi-a-GCST004133	Ulcerative colitis || id:ebi-a-GCST004133	IL12	Inverse variance weighted	13.6718	12	0.322159
prot-a-1467	ebi-a-GCST004133	Ulcerative colitis || id:ebi-a-GCST004133	IL11RA	MR Egger	5.2013	7	0.635412
prot-a-1467	ebi-a-GCST004133	Ulcerative colitis || id:ebi-a-GCST004133	IL11RA	Inverse variance weighted	6.3056	8	0.613041
prot-a-1466	ebi-a-GCST004133	Ulcerative colitis || id:ebi-a-GCST004133	IL11	MR Egger	12.846	10	0.232413
prot-a-1466	ebi-a-GCST004133	Ulcerative colitis || id:ebi-a-GCST004133	IL11	Inverse variance weighted	13.9691	11	0.234706
prot-a-1465	ebi-a-GCST004133	Ulcerative colitis || id:ebi-a-GCST004133	IL10RB	MR Egger	11.3276	9	0.253921
prot-a-1465	ebi-a-GCST004133	Ulcerative colitis || id:ebi-a-GCST004133	IL10RB	Inverse variance weighted	11.7486	10	0.302236
prot-a-1464	ebi-a-GCST004133	Ulcerative colitis || id:ebi-a-GCST004133	IL10	MR Egger	3.81045	5	0.577017
prot-a-1464	ebi-a-GCST004133	Ulcerative colitis || id:ebi-a-GCST004133	IL10	Inverse variance weighted	5.06464	6	0.535549
prot-a-2965	ebi-a-GCST004133	Ulcerative colitis || id:ebi-a-GCST004133	TGFB3	MR Egger	7.74589	9	0.559943
prot-a-2965	ebi-a-GCST004133	Ulcerative colitis || id:ebi-a-GCST004133	TGFB3	Inverse variance weighted	7.74972	10	0.653269
prot-a-2964	ebi-a-GCST004133	Ulcerative colitis || id:ebi-a-GCST004133	TGFB2	MR Egger	4.56275	10	0.918412
prot-a-2964	ebi-a-GCST004133	Ulcerative colitis || id:ebi-a-GCST004133	TGFB2	Inverse variance weighted	4.61966	11	0.94818
prot-a-2962	ebi-a-GCST004133	Ulcerative colitis || id:ebi-a-GCST004133	TGFB1	MR Egger	2.15608	5	0.827154
prot-a-2962	ebi-a-GCST004133	Ulcerative colitis || id:ebi-a-GCST004133	TGFB1	Inverse variance weighted	8.80151	6	0.185053
prot-a-2961	ebi-a-GCST004133	Ulcerative colitis || id:ebi-a-GCST004133	TGFA	MR Egger	2.26891	4	0.686435
prot-a-2961	ebi-a-GCST004133	Ulcerative colitis || id:ebi-a-GCST004133	TGFA	Inverse variance weighted	2.65445	5	0.753076
prot-a-411	ebi-a-GCST004133	Ulcerative colitis || id:ebi-a-GCST004133	CCL8	MR Egger	16.3376	10	0.0903669
prot-a-411	ebi-a-GCST004133	Ulcerative colitis || id:ebi-a-GCST004133	CCL8	Inverse variance weighted	16.3415	11	0.128918
prot-a-410	ebi-a-GCST004133	Ulcerative colitis || id:ebi-a-GCST004133	CCL7	MR Egger	16.1808	15	0.37014
prot-a-410	ebi-a-GCST004133	Ulcerative colitis || id:ebi-a-GCST004133	CCL7	Inverse variance weighted	16.2096	16	0.438428
prot-a-409	ebi-a-GCST004133	Ulcerative colitis || id:ebi-a-GCST004133	CCL5	MR Egger	20.6995	12	0.0549578
prot-a-409	ebi-a-GCST004133	Ulcerative colitis || id:ebi-a-GCST004133	CCL5	Inverse variance weighted	22.635	13	0.0462711
prot-a-398	ebi-a-GCST004133	Ulcerative colitis || id:ebi-a-GCST004133	CCL22	MR Egger	5.8417	10	0.828383
prot-a-398	ebi-a-GCST004133	Ulcerative colitis || id:ebi-a-GCST004133	CCL22	Inverse variance weighted	6.62175	11	0.828836
prot-a-396	ebi-a-GCST004133	Ulcerative colitis || id:ebi-a-GCST004133	CCL20	MR Egger	11.2986	6	0.079575
prot-a-396	ebi-a-GCST004133	Ulcerative colitis || id:ebi-a-GCST004133	CCL20	Inverse variance weighted	11.407	7	0.121823
prot-a-407	ebi-a-GCST004133	Ulcerative colitis || id:ebi-a-GCST004133	CCL3	MR Egger	5.41444	9	0.796788
prot-a-407	ebi-a-GCST004133	Ulcerative colitis || id:ebi-a-GCST004133	CCL3	Inverse variance weighted	6.16217	10	0.801459
prot-a-394	ebi-a-GCST004133	Ulcerative colitis || id:ebi-a-GCST004133	CCL17	MR Egger	33.7366	12	0.000742156
prot-a-394	ebi-a-GCST004133	Ulcerative colitis || id:ebi-a-GCST004133	CCL17	Inverse variance weighted	40.2831	13	0.000124453
prot-a-389	ebi-a-GCST004133	Ulcerative colitis || id:ebi-a-GCST004133	CCL13	MR Egger	17.0989	13	0.194823
prot-a-389	ebi-a-GCST004133	Ulcerative colitis || id:ebi-a-GCST004133	CCL13	Inverse variance weighted	19.0234	14	0.164058
prot-a-388	ebi-a-GCST004133	Ulcerative colitis || id:ebi-a-GCST004133	CCL1	MR Egger	13.0705	12	0.363938
prot-a-388	ebi-a-GCST004133	Ulcerative colitis || id:ebi-a-GCST004133	CCL1	Inverse variance weighted	13.071	13	0.442339
prot-a-745	ebi-a-GCST004133	Ulcerative colitis || id:ebi-a-GCST004133	CXCL16	MR Egger	41.7072	18	0.00121487
prot-a-745	ebi-a-GCST004133	Ulcerative colitis || id:ebi-a-GCST004133	CXCL16	Inverse variance weighted	48.5891	19	0.00021076
prot-a-750	ebi-a-GCST004133	Ulcerative colitis || id:ebi-a-GCST004133	CXCL9	MR Egger	14.3584	9	0.110136
prot-a-750	ebi-a-GCST004133	Ulcerative colitis || id:ebi-a-GCST004133	CXCL9	Inverse variance weighted	16.086	10	0.0971979
prot-a-744	ebi-a-GCST004133	Ulcerative colitis || id:ebi-a-GCST004133	CXCL14	MR Egger	4.09863	7	0.768349
prot-a-744	ebi-a-GCST004133	Ulcerative colitis || id:ebi-a-GCST004133	CXCL14	Inverse variance weighted	4.27809	8	0.831202
prot-a-743	ebi-a-GCST004133	Ulcerative colitis || id:ebi-a-GCST004133	CXCL13	MR Egger	27.9676	12	0.00559276
prot-a-743	ebi-a-GCST004133	Ulcerative colitis || id:ebi-a-GCST004133	CXCL13	Inverse variance weighted	34.8294	13	0.000899268
prot-a-748	ebi-a-GCST004133	Ulcerative colitis || id:ebi-a-GCST004133	CXCL5	MR Egger	27.6949	8	0.000535878
prot-a-748	ebi-a-GCST004133	Ulcerative colitis || id:ebi-a-GCST004133	CXCL5	Inverse variance weighted	27.8292	9	0.00101859
prot-a-739	ebi-a-GCST004133	Ulcerative colitis || id:ebi-a-GCST004133	CXCL11	MR Egger	14.5898	9	0.102838
prot-a-739	ebi-a-GCST004133	Ulcerative colitis || id:ebi-a-GCST004133	CXCL11	Inverse variance weighted	21.7527	10	0.0164153
prot-a-738	ebi-a-GCST004133	Ulcerative colitis || id:ebi-a-GCST004133	CXCL10	MR Egger	8.30425	4	0.0810477
prot-a-738	ebi-a-GCST004133	Ulcerative colitis || id:ebi-a-GCST004133	CXCL10	Inverse variance weighted	8.46537	5	0.132385
prot-a-682	ebi-a-GCST004133	Ulcerative colitis || id:ebi-a-GCST004133	CSF2RA	MR Egger	8.43654	9	0.490821
prot-a-682	ebi-a-GCST004133	Ulcerative colitis || id:ebi-a-GCST004133	CSF2RA	Inverse variance weighted	17.3513	10	0.0669422
prot-a-681	ebi-a-GCST004133	Ulcerative colitis || id:ebi-a-GCST004133	GM-CSF	MR Egger	3.865	6	0.69494
prot-a-681	ebi-a-GCST004133	Ulcerative colitis || id:ebi-a-GCST004133	GM-CSF	Inverse variance weighted	4.73567	7	0.692184
prot-a-686	ebi-a-GCST004133	Ulcerative colitis || id:ebi-a-GCST004133	GCSFR	MR Egger	13.4379	5	0.0196032
prot-a-686	ebi-a-GCST004133	Ulcerative colitis || id:ebi-a-GCST004133	GCSFR	Inverse variance weighted	13.4652	6	0.0362156
prot-a-685	ebi-a-GCST004133	Ulcerative colitis || id:ebi-a-GCST004133	GCSF	MR Egger	14.8632	4	0.00499346
prot-a-685	ebi-a-GCST004133	Ulcerative colitis || id:ebi-a-GCST004133	GCSF	Inverse variance weighted	15.1666	5	0.00967364
prot-a-680	ebi-a-GCST004133	Ulcerative colitis || id:ebi-a-GCST004133	MCSF	MR Egger	5.63499	6	0.465294
prot-a-680	ebi-a-GCST004133	Ulcerative colitis || id:ebi-a-GCST004133	MCSF	Inverse variance weighted	5.78033	7	0.56562
prot-a-2982	ebi-a-GCST004131	Inflammatory bowel disease || id:ebi-a-GCST004131	TIRAP	MR Egger	16.9486	11	0.109405
prot-a-2982	ebi-a-GCST004131	Inflammatory bowel disease || id:ebi-a-GCST004131	TIRAP	Inverse variance weighted	17.7113	12	0.124742
prot-a-1547	ebi-a-GCST004131	Inflammatory bowel disease || id:ebi-a-GCST004131	ILF3	MR Egger	1.32728	3	0.722665
prot-a-1547	ebi-a-GCST004131	Inflammatory bowel disease || id:ebi-a-GCST004131	ILF3	Inverse variance weighted	1.75382	4	0.780919
prot-a-749	ebi-a-GCST004131	Inflammatory bowel disease || id:ebi-a-GCST004131	IL8	MR Egger	20.2892	13	0.0882295
prot-a-749	ebi-a-GCST004131	Inflammatory bowel disease || id:ebi-a-GCST004131	IL8	Inverse variance weighted	20.9876	14	0.10195
prot-a-1545	ebi-a-GCST004131	Inflammatory bowel disease || id:ebi-a-GCST004131	IL9	MR Egger	9.02011	8	0.340603
prot-a-1545	ebi-a-GCST004131	Inflammatory bowel disease || id:ebi-a-GCST004131	IL9	Inverse variance weighted	9.03486	9	0.434063
prot-a-1544	ebi-a-GCST004131	Inflammatory bowel disease || id:ebi-a-GCST004131	IL7RA	MR Egger	17.3813	10	0.066341
prot-a-1544	ebi-a-GCST004131	Inflammatory bowel disease || id:ebi-a-GCST004131	IL7RA	Inverse variance weighted	17.39	11	0.0968572
prot-a-1543	ebi-a-GCST004131	Inflammatory bowel disease || id:ebi-a-GCST004131	IL7	MR Egger	8.63363	12	0.733864
prot-a-1543	ebi-a-GCST004131	Inflammatory bowel disease || id:ebi-a-GCST004131	IL7	Inverse variance weighted	10.6687	13	0.638553
prot-a-1542	ebi-a-GCST004131	Inflammatory bowel disease || id:ebi-a-GCST004131	IL6RB	MR Egger	8.57238	8	0.379643
prot-a-1542	ebi-a-GCST004131	Inflammatory bowel disease || id:ebi-a-GCST004131	IL6RB	Inverse variance weighted	10.988	9	0.276533
prot-a-1540	ebi-a-GCST004131	Inflammatory bowel disease || id:ebi-a-GCST004131	IL6RA	MR Egger	22.5738	7	0.00202157
prot-a-1540	ebi-a-GCST004131	Inflammatory bowel disease || id:ebi-a-GCST004131	IL6RA	Inverse variance weighted	63.3252	8	1.03358e-10
prot-a-1538	ebi-a-GCST004131	Inflammatory bowel disease || id:ebi-a-GCST004131	IL6	MR Egger	17.426	10	0.0654536
prot-a-1538	ebi-a-GCST004131	Inflammatory bowel disease || id:ebi-a-GCST004131	IL6	Inverse variance weighted	18.3264	11	0.0743098
prot-a-1536	ebi-a-GCST004131	Inflammatory bowel disease || id:ebi-a-GCST004131	IL5RA	MR Egger	15.5008	8	0.0501084
prot-a-1536	ebi-a-GCST004131	Inflammatory bowel disease || id:ebi-a-GCST004131	IL5RA	Inverse variance weighted	15.9562	9	0.0678022
prot-a-1534	ebi-a-GCST004131	Inflammatory bowel disease || id:ebi-a-GCST004131	IL5	MR Egger	11.8835	7	0.104455
prot-a-1534	ebi-a-GCST004131	Inflammatory bowel disease || id:ebi-a-GCST004131	IL5	Inverse variance weighted	12.2975	8	0.138415
prot-a-1533	ebi-a-GCST004131	Inflammatory bowel disease || id:ebi-a-GCST004131	IL4RA	MR Egger	15.6392	9	0.0748094
prot-a-1533	ebi-a-GCST004131	Inflammatory bowel disease || id:ebi-a-GCST004131	IL4RA	Inverse variance weighted	15.872	10	0.103356
prot-a-1532	ebi-a-GCST004131	Inflammatory bowel disease || id:ebi-a-GCST004131	IL4	MR Egger	23.2362	13	0.0389276
prot-a-1532	ebi-a-GCST004131	Inflammatory bowel disease || id:ebi-a-GCST004131	IL4	Inverse variance weighted	23.2394	14	0.0564838
prot-a-1530	ebi-a-GCST004131	Inflammatory bowel disease || id:ebi-a-GCST004131	IL3RA	MR Egger	5.46991	9	0.791574
prot-a-1530	ebi-a-GCST004131	Inflammatory bowel disease || id:ebi-a-GCST004131	IL3RA	Inverse variance weighted	6.12987	10	0.804236
prot-a-1529	ebi-a-GCST004131	Inflammatory bowel disease || id:ebi-a-GCST004131	IL37	MR Egger	15.4749	10	0.115682
prot-a-1529	ebi-a-GCST004131	Inflammatory bowel disease || id:ebi-a-GCST004131	IL37	Inverse variance weighted	15.7727	11	0.149782
prot-a-1528	ebi-a-GCST004131	Inflammatory bowel disease || id:ebi-a-GCST004131	IL36 gamma	MR Egger	8.62783	6	0.195616
prot-a-1528	ebi-a-GCST004131	Inflammatory bowel disease || id:ebi-a-GCST004131	IL36 gamma	Inverse variance weighted	9.57984	7	0.21366
prot-a-1527	ebi-a-GCST004131	Inflammatory bowel disease || id:ebi-a-GCST004131	IL36 beta	MR Egger	10.573	12	0.565819
prot-a-1527	ebi-a-GCST004131	Inflammatory bowel disease || id:ebi-a-GCST004131	IL36 beta	Inverse variance weighted	10.7815	13	0.629115
prot-a-1526	ebi-a-GCST004131	Inflammatory bowel disease || id:ebi-a-GCST004131	IL36 alpha	MR Egger	22.7423	8	0.00371132
prot-a-1526	ebi-a-GCST004131	Inflammatory bowel disease || id:ebi-a-GCST004131	IL36 alpha	Inverse variance weighted	24.6068	9	0.00343841
prot-a-1525	ebi-a-GCST004131	Inflammatory bowel disease || id:ebi-a-GCST004131	IL3	MR Egger	13.6391	7	0.0579848
prot-a-1525	ebi-a-GCST004131	Inflammatory bowel disease || id:ebi-a-GCST004131	IL3	Inverse variance weighted	14.1981	8	0.0767467
prot-a-1524	ebi-a-GCST004131	Inflammatory bowel disease || id:ebi-a-GCST004131	IL34	MR Egger	15.2737	11	0.170304
prot-a-1524	ebi-a-GCST004131	Inflammatory bowel disease || id:ebi-a-GCST004131	IL34	Inverse variance weighted	19.5058	12	0.0770321
prot-a-1523	ebi-a-GCST004131	Inflammatory bowel disease || id:ebi-a-GCST004131	IL32	MR Egger	13.7459	10	0.184902
prot-a-1523	ebi-a-GCST004131	Inflammatory bowel disease || id:ebi-a-GCST004131	IL32	Inverse variance weighted	13.8059	11	0.243922
prot-a-1521	ebi-a-GCST004131	Inflammatory bowel disease || id:ebi-a-GCST004131	IL31	MR Egger	10.364	9	0.321826
prot-a-1521	ebi-a-GCST004131	Inflammatory bowel disease || id:ebi-a-GCST004131	IL31	Inverse variance weighted	10.389	10	0.407053
prot-a-1519	ebi-a-GCST004131	Inflammatory bowel disease || id:ebi-a-GCST004131	IL2RB	MR Egger	37.3447	10	4.9326e-05
prot-a-1519	ebi-a-GCST004131	Inflammatory bowel disease || id:ebi-a-GCST004131	IL2RB	Inverse variance weighted	40.6642	11	2.75263e-05
prot-a-1518	ebi-a-GCST004131	Inflammatory bowel disease || id:ebi-a-GCST004131	IL2RA	MR Egger	8.32827	5	0.139048
prot-a-1518	ebi-a-GCST004131	Inflammatory bowel disease || id:ebi-a-GCST004131	IL2RA	Inverse variance weighted	8.41077	6	0.209527
prot-a-1517	ebi-a-GCST004131	Inflammatory bowel disease || id:ebi-a-GCST004131	IL27RA	MR Egger	7.97963	8	0.435463
prot-a-1517	ebi-a-GCST004131	Inflammatory bowel disease || id:ebi-a-GCST004131	IL27RA	Inverse variance weighted	8.12272	9	0.521828
prot-a-1516	ebi-a-GCST004131	Inflammatory bowel disease || id:ebi-a-GCST004131	IL27	MR Egger	62.1645	15	1.06658e-07
prot-a-1516	ebi-a-GCST004131	Inflammatory bowel disease || id:ebi-a-GCST004131	IL27	Inverse variance weighted	64.1135	16	1.046e-07
prot-a-1515	ebi-a-GCST004131	Inflammatory bowel disease || id:ebi-a-GCST004131	IL25	MR Egger	9.82798	13	0.707937
prot-a-1515	ebi-a-GCST004131	Inflammatory bowel disease || id:ebi-a-GCST004131	IL25	Inverse variance weighted	12.1026	14	0.598062
prot-a-1514	ebi-a-GCST004131	Inflammatory bowel disease || id:ebi-a-GCST004131	IL24	MR Egger	27.6005	13	0.0102841
prot-a-1514	ebi-a-GCST004131	Inflammatory bowel disease || id:ebi-a-GCST004131	IL24	Inverse variance weighted	28.5618	14	0.011972
prot-a-1512	ebi-a-GCST004131	Inflammatory bowel disease || id:ebi-a-GCST004131	IL2	MR Egger	17.4008	13	0.181624
prot-a-1512	ebi-a-GCST004131	Inflammatory bowel disease || id:ebi-a-GCST004131	IL2	Inverse variance weighted	17.9321	14	0.20989
prot-a-1507	ebi-a-GCST004131	Inflammatory bowel disease || id:ebi-a-GCST004131	IL22	MR Egger	10.4522	11	0.490226
prot-a-1507	ebi-a-GCST004131	Inflammatory bowel disease || id:ebi-a-GCST004131	IL22	Inverse variance weighted	11.7698	12	0.464344
prot-a-1506	ebi-a-GCST004131	Inflammatory bowel disease || id:ebi-a-GCST004131	IL21	MR Egger	39.73	11	3.97847e-05
prot-a-1506	ebi-a-GCST004131	Inflammatory bowel disease || id:ebi-a-GCST004131	IL21	Inverse variance weighted	43.7252	12	1.70079e-05
prot-a-1505	ebi-a-GCST004131	Inflammatory bowel disease || id:ebi-a-GCST004131	IL20	MR Egger	1.41803	3	0.701315
prot-a-1505	ebi-a-GCST004131	Inflammatory bowel disease || id:ebi-a-GCST004131	IL20	Inverse variance weighted	1.71948	4	0.787176
prot-a-1504	ebi-a-GCST004131	Inflammatory bowel disease || id:ebi-a-GCST004131	IL1RN	MR Egger	15.3967	9	0.0805999
prot-a-1504	ebi-a-GCST004131	Inflammatory bowel disease || id:ebi-a-GCST004131	IL1RN	Inverse variance weighted	15.4329	10	0.117057
prot-a-1503	ebi-a-GCST004131	Inflammatory bowel disease || id:ebi-a-GCST004131	IL1RL2	MR Egger	7.89526	7	0.34192
prot-a-1503	ebi-a-GCST004131	Inflammatory bowel disease || id:ebi-a-GCST004131	IL1RL2	Inverse variance weighted	10.7773	8	0.214637
prot-a-1502	ebi-a-GCST004131	Inflammatory bowel disease || id:ebi-a-GCST004131	IL1RL1	MR Egger	16.851	13	0.206204
prot-a-1502	ebi-a-GCST004131	Inflammatory bowel disease || id:ebi-a-GCST004131	IL1RL1	Inverse variance weighted	28.0028	14	0.0142156
prot-a-1501	ebi-a-GCST004131	Inflammatory bowel disease || id:ebi-a-GCST004131	IL1RAPL2	MR Egger	11.4194	10	0.325788
prot-a-1501	ebi-a-GCST004131	Inflammatory bowel disease || id:ebi-a-GCST004131	IL1RAPL2	Inverse variance weighted	11.7333	11	0.384024
prot-a-1499	ebi-a-GCST004131	Inflammatory bowel disease || id:ebi-a-GCST004131	IL1RAP	MR Egger	16.6305	12	0.164034
prot-a-1499	ebi-a-GCST004131	Inflammatory bowel disease || id:ebi-a-GCST004131	IL1RAP	Inverse variance weighted	17.5199	13	0.176613
prot-a-1497	ebi-a-GCST004131	Inflammatory bowel disease || id:ebi-a-GCST004131	IL1R2	MR Egger	28.2121	11	0.00300371
prot-a-1497	ebi-a-GCST004131	Inflammatory bowel disease || id:ebi-a-GCST004131	IL1R2	Inverse variance weighted	31.3159	12	0.00176279
prot-a-1496	ebi-a-GCST004131	Inflammatory bowel disease || id:ebi-a-GCST004131	IL1R1	MR Egger	27.2029	14	0.0181169
prot-a-1496	ebi-a-GCST004131	Inflammatory bowel disease || id:ebi-a-GCST004131	IL1R1	Inverse variance weighted	28.7723	15	0.0172052
prot-a-1495	ebi-a-GCST004131	Inflammatory bowel disease || id:ebi-a-GCST004131	IL1B	MR Egger	11.7237	7	0.11002
prot-a-1495	ebi-a-GCST004131	Inflammatory bowel disease || id:ebi-a-GCST004131	IL1B	Inverse variance weighted	12.4267	8	0.133157
prot-a-1494	ebi-a-GCST004131	Inflammatory bowel disease || id:ebi-a-GCST004131	IL1A	MR Egger	19.1918	14	0.157751
prot-a-1494	ebi-a-GCST004131	Inflammatory bowel disease || id:ebi-a-GCST004131	IL1A	Inverse variance weighted	19.2204	15	0.203921
prot-a-1493	ebi-a-GCST004131	Inflammatory bowel disease || id:ebi-a-GCST004131	IL19	MR Egger	18.1708	10	0.05215
prot-a-1493	ebi-a-GCST004131	Inflammatory bowel disease || id:ebi-a-GCST004131	IL19	Inverse variance weighted	19.2921	11	0.0560476
prot-a-1491	ebi-a-GCST004131	Inflammatory bowel disease || id:ebi-a-GCST004131	IL18R1	MR Egger	15.4734	11	0.161834
prot-a-1491	ebi-a-GCST004131	Inflammatory bowel disease || id:ebi-a-GCST004131	IL18R1	Inverse variance weighted	17.3038	12	0.138522
prot-a-1490	ebi-a-GCST004131	Inflammatory bowel disease || id:ebi-a-GCST004131	IL18BP	MR Egger	14.4131	9	0.108372
prot-a-1490	ebi-a-GCST004131	Inflammatory bowel disease || id:ebi-a-GCST004131	IL18BP	Inverse variance weighted	17.8613	10	0.0573481
prot-a-1479	ebi-a-GCST004131	Inflammatory bowel disease || id:ebi-a-GCST004131	IL16	MR Egger	24.9119	14	0.0354468
prot-a-1479	ebi-a-GCST004131	Inflammatory bowel disease || id:ebi-a-GCST004131	IL16	Inverse variance weighted	25.4366	15	0.0443789
prot-a-1475	ebi-a-GCST004131	Inflammatory bowel disease || id:ebi-a-GCST004131	IL13	MR Egger	11.3997	11	0.410409
prot-a-1475	ebi-a-GCST004131	Inflammatory bowel disease || id:ebi-a-GCST004131	IL13	Inverse variance weighted	11.4055	12	0.494524
prot-a-1471	ebi-a-GCST004131	Inflammatory bowel disease || id:ebi-a-GCST004131	IL23	MR Egger	115.041	12	5.99597e-19
prot-a-1471	ebi-a-GCST004131	Inflammatory bowel disease || id:ebi-a-GCST004131	IL23	Inverse variance weighted	132.139	13	7.84118e-22
prot-a-1468	ebi-a-GCST004131	Inflammatory bowel disease || id:ebi-a-GCST004131	IL12	MR Egger	13.1038	11	0.286594
prot-a-1468	ebi-a-GCST004131	Inflammatory bowel disease || id:ebi-a-GCST004131	IL12	Inverse variance weighted	13.2598	12	0.350447
prot-a-1467	ebi-a-GCST004131	Inflammatory bowel disease || id:ebi-a-GCST004131	IL11RA	MR Egger	1.80514	7	0.969834
prot-a-1467	ebi-a-GCST004131	Inflammatory bowel disease || id:ebi-a-GCST004131	IL11RA	Inverse variance weighted	3.21746	8	0.919979
prot-a-1466	ebi-a-GCST004131	Inflammatory bowel disease || id:ebi-a-GCST004131	IL11	MR Egger	20.4663	10	0.025138
prot-a-1466	ebi-a-GCST004131	Inflammatory bowel disease || id:ebi-a-GCST004131	IL11	Inverse variance weighted	21.242	11	0.0309484
prot-a-1465	ebi-a-GCST004131	Inflammatory bowel disease || id:ebi-a-GCST004131	IL10RB	MR Egger	11.1691	9	0.264296
prot-a-1465	ebi-a-GCST004131	Inflammatory bowel disease || id:ebi-a-GCST004131	IL10RB	Inverse variance weighted	11.1749	10	0.344054
prot-a-1464	ebi-a-GCST004131	Inflammatory bowel disease || id:ebi-a-GCST004131	IL10	MR Egger	7.02097	5	0.219085
prot-a-1464	ebi-a-GCST004131	Inflammatory bowel disease || id:ebi-a-GCST004131	IL10	Inverse variance weighted	10.1756	6	0.117451
prot-a-2965	ebi-a-GCST004131	Inflammatory bowel disease || id:ebi-a-GCST004131	TGFB3	MR Egger	10.2091	9	0.333826
prot-a-2965	ebi-a-GCST004131	Inflammatory bowel disease || id:ebi-a-GCST004131	TGFB3	Inverse variance weighted	10.2759	10	0.416632
prot-a-2964	ebi-a-GCST004131	Inflammatory bowel disease || id:ebi-a-GCST004131	TGFB2	MR Egger	7.46387	10	0.681046
prot-a-2964	ebi-a-GCST004131	Inflammatory bowel disease || id:ebi-a-GCST004131	TGFB2	Inverse variance weighted	8.06709	11	0.707282
prot-a-2962	ebi-a-GCST004131	Inflammatory bowel disease || id:ebi-a-GCST004131	TGFB1	MR Egger	2.89245	5	0.716562
prot-a-2962	ebi-a-GCST004131	Inflammatory bowel disease || id:ebi-a-GCST004131	TGFB1	Inverse variance weighted	9.20338	6	0.162459
prot-a-2961	ebi-a-GCST004131	Inflammatory bowel disease || id:ebi-a-GCST004131	TGFA	MR Egger	1.97339	4	0.740653
prot-a-2961	ebi-a-GCST004131	Inflammatory bowel disease || id:ebi-a-GCST004131	TGFA	Inverse variance weighted	2.18455	5	0.823064
prot-a-411	ebi-a-GCST004131	Inflammatory bowel disease || id:ebi-a-GCST004131	CCL8	MR Egger	18.581	10	0.045919
prot-a-411	ebi-a-GCST004131	Inflammatory bowel disease || id:ebi-a-GCST004131	CCL8	Inverse variance weighted	18.6139	11	0.0683864
prot-a-410	ebi-a-GCST004131	Inflammatory bowel disease || id:ebi-a-GCST004131	CCL7	MR Egger	5.98138	15	0.980059
prot-a-410	ebi-a-GCST004131	Inflammatory bowel disease || id:ebi-a-GCST004131	CCL7	Inverse variance weighted	6.67876	16	0.978967
prot-a-409	ebi-a-GCST004131	Inflammatory bowel disease || id:ebi-a-GCST004131	CCL5	MR Egger	26.04	12	0.0105947
prot-a-409	ebi-a-GCST004131	Inflammatory bowel disease || id:ebi-a-GCST004131	CCL5	Inverse variance weighted	27.2217	13	0.0115994
prot-a-398	ebi-a-GCST004131	Inflammatory bowel disease || id:ebi-a-GCST004131	CCL22	MR Egger	9.92623	10	0.446989
prot-a-398	ebi-a-GCST004131	Inflammatory bowel disease || id:ebi-a-GCST004131	CCL22	Inverse variance weighted	10.5746	11	0.47956
prot-a-396	ebi-a-GCST004131	Inflammatory bowel disease || id:ebi-a-GCST004131	CCL20	MR Egger	5.11517	6	0.529128
prot-a-396	ebi-a-GCST004131	Inflammatory bowel disease || id:ebi-a-GCST004131	CCL20	Inverse variance weighted	5.46543	7	0.603357
prot-a-407	ebi-a-GCST004131	Inflammatory bowel disease || id:ebi-a-GCST004131	CCL3	MR Egger	7.79165	9	0.555271
prot-a-407	ebi-a-GCST004131	Inflammatory bowel disease || id:ebi-a-GCST004131	CCL3	Inverse variance weighted	8.88116	10	0.543418
prot-a-394	ebi-a-GCST004131	Inflammatory bowel disease || id:ebi-a-GCST004131	CCL17	MR Egger	54.4166	12	2.30214e-07
prot-a-394	ebi-a-GCST004131	Inflammatory bowel disease || id:ebi-a-GCST004131	CCL17	Inverse variance weighted	60.2653	13	4.70961e-08
prot-a-389	ebi-a-GCST004131	Inflammatory bowel disease || id:ebi-a-GCST004131	CCL13	MR Egger	11.9787	13	0.529392
prot-a-389	ebi-a-GCST004131	Inflammatory bowel disease || id:ebi-a-GCST004131	CCL13	Inverse variance weighted	12.7965	14	0.542609
prot-a-388	ebi-a-GCST004131	Inflammatory bowel disease || id:ebi-a-GCST004131	CCL1	MR Egger	18.8566	12	0.0920475
prot-a-388	ebi-a-GCST004131	Inflammatory bowel disease || id:ebi-a-GCST004131	CCL1	Inverse variance weighted	21.0508	13	0.0719307
prot-a-745	ebi-a-GCST004131	Inflammatory bowel disease || id:ebi-a-GCST004131	CXCL16	MR Egger	60.4054	18	1.75932e-06
prot-a-745	ebi-a-GCST004131	Inflammatory bowel disease || id:ebi-a-GCST004131	CXCL16	Inverse variance weighted	66.6804	19	3.24759e-07
prot-a-750	ebi-a-GCST004131	Inflammatory bowel disease || id:ebi-a-GCST004131	CXCL9	MR Egger	14.9602	9	0.0920353
prot-a-750	ebi-a-GCST004131	Inflammatory bowel disease || id:ebi-a-GCST004131	CXCL9	Inverse variance weighted	16.5329	10	0.0853606
prot-a-744	ebi-a-GCST004131	Inflammatory bowel disease || id:ebi-a-GCST004131	CXCL14	MR Egger	5.58418	7	0.58905
prot-a-744	ebi-a-GCST004131	Inflammatory bowel disease || id:ebi-a-GCST004131	CXCL14	Inverse variance weighted	6.58767	8	0.5817
prot-a-743	ebi-a-GCST004131	Inflammatory bowel disease || id:ebi-a-GCST004131	CXCL13	MR Egger	42.4826	12	2.7618e-05
prot-a-743	ebi-a-GCST004131	Inflammatory bowel disease || id:ebi-a-GCST004131	CXCL13	Inverse variance weighted	53.2598	13	8.14302e-07
prot-a-748	ebi-a-GCST004131	Inflammatory bowel disease || id:ebi-a-GCST004131	CXCL5	MR Egger	24.5839	9	0.00346766
prot-a-748	ebi-a-GCST004131	Inflammatory bowel disease || id:ebi-a-GCST004131	CXCL5	Inverse variance weighted	24.5921	10	0.00617465
prot-a-739	ebi-a-GCST004131	Inflammatory bowel disease || id:ebi-a-GCST004131	CXCL11	MR Egger	29.787	9	0.000476875
prot-a-739	ebi-a-GCST004131	Inflammatory bowel disease || id:ebi-a-GCST004131	CXCL11	Inverse variance weighted	41.273	10	1.0095e-05
prot-a-738	ebi-a-GCST004131	Inflammatory bowel disease || id:ebi-a-GCST004131	CXCL10	MR Egger	7.32521	4	0.119668
prot-a-738	ebi-a-GCST004131	Inflammatory bowel disease || id:ebi-a-GCST004131	CXCL10	Inverse variance weighted	7.34196	5	0.196425
prot-a-682	ebi-a-GCST004131	Inflammatory bowel disease || id:ebi-a-GCST004131	CSF2RA	MR Egger	6.26415	9	0.713218
prot-a-682	ebi-a-GCST004131	Inflammatory bowel disease || id:ebi-a-GCST004131	CSF2RA	Inverse variance weighted	12.6798	10	0.242129
prot-a-681	ebi-a-GCST004131	Inflammatory bowel disease || id:ebi-a-GCST004131	GM-CSF	MR Egger	2.37792	6	0.881872
prot-a-681	ebi-a-GCST004131	Inflammatory bowel disease || id:ebi-a-GCST004131	GM-CSF	Inverse variance weighted	2.60415	7	0.919053
prot-a-686	ebi-a-GCST004131	Inflammatory bowel disease || id:ebi-a-GCST004131	GCSFR	MR Egger	18.6945	5	0.00219091
prot-a-686	ebi-a-GCST004131	Inflammatory bowel disease || id:ebi-a-GCST004131	GCSFR	Inverse variance weighted	19.2379	6	0.00378009
prot-a-685	ebi-a-GCST004131	Inflammatory bowel disease || id:ebi-a-GCST004131	GCSF	MR Egger	14.3	4	0.00639651
prot-a-685	ebi-a-GCST004131	Inflammatory bowel disease || id:ebi-a-GCST004131	GCSF	Inverse variance weighted	14.331	5	0.0136378
prot-a-680	ebi-a-GCST004131	Inflammatory bowel disease || id:ebi-a-GCST004131	MCSF	MR Egger	4.35686	6	0.628503
prot-a-680	ebi-a-GCST004131	Inflammatory bowel disease || id:ebi-a-GCST004131	MCSF	Inverse variance weighted	4.542	7	0.715654
prot-a-2982	finn-b-K11_COELIAC	Coeliac disease || id:finn-b-K11_COELIAC	TIRAP	MR Egger	6.96366	12	0.860006
prot-a-2982	finn-b-K11_COELIAC	Coeliac disease || id:finn-b-K11_COELIAC	TIRAP	Inverse variance weighted	8.05045	13	0.840298
prot-a-1547	finn-b-K11_COELIAC	Coeliac disease || id:finn-b-K11_COELIAC	ILF3	MR Egger	4.91205	5	0.426708
prot-a-1547	finn-b-K11_COELIAC	Coeliac disease || id:finn-b-K11_COELIAC	ILF3	Inverse variance weighted	5.15107	6	0.524588
prot-a-749	finn-b-K11_COELIAC	Coeliac disease || id:finn-b-K11_COELIAC	IL8	MR Egger	24.9706	13	0.0232898
prot-a-749	finn-b-K11_COELIAC	Coeliac disease || id:finn-b-K11_COELIAC	IL8	Inverse variance weighted	26.2618	14	0.0239716
prot-a-1545	finn-b-K11_COELIAC	Coeliac disease || id:finn-b-K11_COELIAC	IL9	MR Egger	11.4554	9	0.245781
prot-a-1545	finn-b-K11_COELIAC	Coeliac disease || id:finn-b-K11_COELIAC	IL9	Inverse variance weighted	11.4898	10	0.320651
prot-a-1544	finn-b-K11_COELIAC	Coeliac disease || id:finn-b-K11_COELIAC	IL7RA	MR Egger	9.46663	11	0.578902
prot-a-1544	finn-b-K11_COELIAC	Coeliac disease || id:finn-b-K11_COELIAC	IL7RA	Inverse variance weighted	9.4675	12	0.662566
prot-a-1543	finn-b-K11_COELIAC	Coeliac disease || id:finn-b-K11_COELIAC	IL7	MR Egger	16.2955	16	0.432537
prot-a-1543	finn-b-K11_COELIAC	Coeliac disease || id:finn-b-K11_COELIAC	IL7	Inverse variance weighted	16.7761	17	0.469636
prot-a-1542	finn-b-K11_COELIAC	Coeliac disease || id:finn-b-K11_COELIAC	IL6RB	MR Egger	12.8444	12	0.380448
prot-a-1542	finn-b-K11_COELIAC	Coeliac disease || id:finn-b-K11_COELIAC	IL6RB	Inverse variance weighted	13.5748	13	0.404452
prot-a-1540	finn-b-K11_COELIAC	Coeliac disease || id:finn-b-K11_COELIAC	IL6RA	MR Egger	3.30649	7	0.855277
prot-a-1540	finn-b-K11_COELIAC	Coeliac disease || id:finn-b-K11_COELIAC	IL6RA	Inverse variance weighted	4.10894	8	0.847163
prot-a-1538	finn-b-K11_COELIAC	Coeliac disease || id:finn-b-K11_COELIAC	IL6	MR Egger	6.07518	11	0.868301
prot-a-1538	finn-b-K11_COELIAC	Coeliac disease || id:finn-b-K11_COELIAC	IL6	Inverse variance weighted	7.63798	12	0.812743
prot-a-1536	finn-b-K11_COELIAC	Coeliac disease || id:finn-b-K11_COELIAC	IL5RA	MR Egger	300.509	7	4.71064e-61
prot-a-1536	finn-b-K11_COELIAC	Coeliac disease || id:finn-b-K11_COELIAC	IL5RA	Inverse variance weighted	336.95	8	5.51422e-68
prot-a-1534	finn-b-K11_COELIAC	Coeliac disease || id:finn-b-K11_COELIAC	IL5	MR Egger	12.2793	8	0.13917
prot-a-1534	finn-b-K11_COELIAC	Coeliac disease || id:finn-b-K11_COELIAC	IL5	Inverse variance weighted	12.6531	9	0.17894
prot-a-1533	finn-b-K11_COELIAC	Coeliac disease || id:finn-b-K11_COELIAC	IL4RA	MR Egger	13.5335	8	0.0947647
prot-a-1533	finn-b-K11_COELIAC	Coeliac disease || id:finn-b-K11_COELIAC	IL4RA	Inverse variance weighted	13.701	9	0.133366
prot-a-1532	finn-b-K11_COELIAC	Coeliac disease || id:finn-b-K11_COELIAC	IL4	MR Egger	12.1814	15	0.665249
prot-a-1532	finn-b-K11_COELIAC	Coeliac disease || id:finn-b-K11_COELIAC	IL4	Inverse variance weighted	13.056	16	0.668661
prot-a-1530	finn-b-K11_COELIAC	Coeliac disease || id:finn-b-K11_COELIAC	IL3RA	MR Egger	107.412	13	5.99266e-17
prot-a-1530	finn-b-K11_COELIAC	Coeliac disease || id:finn-b-K11_COELIAC	IL3RA	Inverse variance weighted	130.617	14	5.13477e-21
prot-a-1529	finn-b-K11_COELIAC	Coeliac disease || id:finn-b-K11_COELIAC	IL37	MR Egger	6.53327	11	0.835524
prot-a-1529	finn-b-K11_COELIAC	Coeliac disease || id:finn-b-K11_COELIAC	IL37	Inverse variance weighted	6.71061	12	0.876131
prot-a-1528	finn-b-K11_COELIAC	Coeliac disease || id:finn-b-K11_COELIAC	IL36 gamma	MR Egger	11.648	8	0.167612
prot-a-1528	finn-b-K11_COELIAC	Coeliac disease || id:finn-b-K11_COELIAC	IL36 gamma	Inverse variance weighted	11.6883	9	0.231457
prot-a-1527	finn-b-K11_COELIAC	Coeliac disease || id:finn-b-K11_COELIAC	IL36 beta	MR Egger	13.1994	13	0.43253
prot-a-1527	finn-b-K11_COELIAC	Coeliac disease || id:finn-b-K11_COELIAC	IL36 beta	Inverse variance weighted	13.8656	14	0.45977
prot-a-1526	finn-b-K11_COELIAC	Coeliac disease || id:finn-b-K11_COELIAC	IL36 alpha	MR Egger	214.414	10	1.57611e-40
prot-a-1526	finn-b-K11_COELIAC	Coeliac disease || id:finn-b-K11_COELIAC	IL36 alpha	Inverse variance weighted	256.236	11	1.38016e-48
prot-a-1525	finn-b-K11_COELIAC	Coeliac disease || id:finn-b-K11_COELIAC	IL3	MR Egger	3.48639	7	0.836665
prot-a-1525	finn-b-K11_COELIAC	Coeliac disease || id:finn-b-K11_COELIAC	IL3	Inverse variance weighted	10.1029	8	0.257875
prot-a-1524	finn-b-K11_COELIAC	Coeliac disease || id:finn-b-K11_COELIAC	IL34	MR Egger	16.5989	17	0.481842
prot-a-1524	finn-b-K11_COELIAC	Coeliac disease || id:finn-b-K11_COELIAC	IL34	Inverse variance weighted	16.6864	18	0.544757
prot-a-1523	finn-b-K11_COELIAC	Coeliac disease || id:finn-b-K11_COELIAC	IL32	MR Egger	14.8394	12	0.250338
prot-a-1523	finn-b-K11_COELIAC	Coeliac disease || id:finn-b-K11_COELIAC	IL32	Inverse variance weighted	15.1593	13	0.297516
prot-a-1521	finn-b-K11_COELIAC	Coeliac disease || id:finn-b-K11_COELIAC	IL31	MR Egger	4.61275	10	0.915503
prot-a-1521	finn-b-K11_COELIAC	Coeliac disease || id:finn-b-K11_COELIAC	IL31	Inverse variance weighted	5.66404	11	0.894814
prot-a-1519	finn-b-K11_COELIAC	Coeliac disease || id:finn-b-K11_COELIAC	IL2RB	MR Egger	46.3233	11	2.83449e-06
prot-a-1519	finn-b-K11_COELIAC	Coeliac disease || id:finn-b-K11_COELIAC	IL2RB	Inverse variance weighted	46.5753	12	5.5207e-06
prot-a-1518	finn-b-K11_COELIAC	Coeliac disease || id:finn-b-K11_COELIAC	IL2RA	MR Egger	1.984	6	0.921164
prot-a-1518	finn-b-K11_COELIAC	Coeliac disease || id:finn-b-K11_COELIAC	IL2RA	Inverse variance weighted	2.05372	7	0.956807
prot-a-1517	finn-b-K11_COELIAC	Coeliac disease || id:finn-b-K11_COELIAC	IL27RA	MR Egger	8.82461	10	0.548826
prot-a-1517	finn-b-K11_COELIAC	Coeliac disease || id:finn-b-K11_COELIAC	IL27RA	Inverse variance weighted	13.0191	11	0.29208
prot-a-1516	finn-b-K11_COELIAC	Coeliac disease || id:finn-b-K11_COELIAC	IL27	MR Egger	10.2526	17	0.892687
prot-a-1516	finn-b-K11_COELIAC	Coeliac disease || id:finn-b-K11_COELIAC	IL27	Inverse variance weighted	11.8037	18	0.857203
prot-a-1515	finn-b-K11_COELIAC	Coeliac disease || id:finn-b-K11_COELIAC	IL25	MR Egger	18.9906	13	0.123394
prot-a-1515	finn-b-K11_COELIAC	Coeliac disease || id:finn-b-K11_COELIAC	IL25	Inverse variance weighted	19.0572	14	0.162776
prot-a-1514	finn-b-K11_COELIAC	Coeliac disease || id:finn-b-K11_COELIAC	IL24	MR Egger	28.5764	14	0.0119182
prot-a-1514	finn-b-K11_COELIAC	Coeliac disease || id:finn-b-K11_COELIAC	IL24	Inverse variance weighted	29.7949	15	0.0126831
prot-a-1512	finn-b-K11_COELIAC	Coeliac disease || id:finn-b-K11_COELIAC	IL2	MR Egger	13.3047	17	0.715562
prot-a-1512	finn-b-K11_COELIAC	Coeliac disease || id:finn-b-K11_COELIAC	IL2	Inverse variance weighted	13.4346	18	0.765138
prot-a-1507	finn-b-K11_COELIAC	Coeliac disease || id:finn-b-K11_COELIAC	IL22	MR Egger	15.9972	14	0.313544
prot-a-1507	finn-b-K11_COELIAC	Coeliac disease || id:finn-b-K11_COELIAC	IL22	Inverse variance weighted	16.0209	15	0.380664
prot-a-1506	finn-b-K11_COELIAC	Coeliac disease || id:finn-b-K11_COELIAC	IL21	MR Egger	459.704	14	3.15713e-89
prot-a-1506	finn-b-K11_COELIAC	Coeliac disease || id:finn-b-K11_COELIAC	IL21	Inverse variance weighted	551.878	15	5.8155e-108
prot-a-1505	finn-b-K11_COELIAC	Coeliac disease || id:finn-b-K11_COELIAC	IL20	MR Egger	6.44266	3	0.0919517
prot-a-1505	finn-b-K11_COELIAC	Coeliac disease || id:finn-b-K11_COELIAC	IL20	Inverse variance weighted	6.80289	4	0.146679
prot-a-1504	finn-b-K11_COELIAC	Coeliac disease || id:finn-b-K11_COELIAC	IL1RN	MR Egger	16.652	13	0.215707
prot-a-1504	finn-b-K11_COELIAC	Coeliac disease || id:finn-b-K11_COELIAC	IL1RN	Inverse variance weighted	16.7219	14	0.271302
prot-a-1503	finn-b-K11_COELIAC	Coeliac disease || id:finn-b-K11_COELIAC	IL1RL2	MR Egger	6.25471	9	0.714179
prot-a-1503	finn-b-K11_COELIAC	Coeliac disease || id:finn-b-K11_COELIAC	IL1RL2	Inverse variance weighted	6.98201	10	0.727142
prot-a-1502	finn-b-K11_COELIAC	Coeliac disease || id:finn-b-K11_COELIAC	IL1RL1	MR Egger	16.6326	14	0.276283
prot-a-1502	finn-b-K11_COELIAC	Coeliac disease || id:finn-b-K11_COELIAC	IL1RL1	Inverse variance weighted	17.1748	15	0.308522
prot-a-1501	finn-b-K11_COELIAC	Coeliac disease || id:finn-b-K11_COELIAC	IL1RAPL2	MR Egger	6.07052	11	0.868618
prot-a-1501	finn-b-K11_COELIAC	Coeliac disease || id:finn-b-K11_COELIAC	IL1RAPL2	Inverse variance weighted	6.17272	12	0.907126
prot-a-1499	finn-b-K11_COELIAC	Coeliac disease || id:finn-b-K11_COELIAC	IL1RAP	MR Egger	14.7738	11	0.193089
prot-a-1499	finn-b-K11_COELIAC	Coeliac disease || id:finn-b-K11_COELIAC	IL1RAP	Inverse variance weighted	18.0144	12	0.115255
prot-a-1497	finn-b-K11_COELIAC	Coeliac disease || id:finn-b-K11_COELIAC	IL1R2	MR Egger	6.24991	10	0.793848
prot-a-1497	finn-b-K11_COELIAC	Coeliac disease || id:finn-b-K11_COELIAC	IL1R2	Inverse variance weighted	6.56109	11	0.833433
prot-a-1496	finn-b-K11_COELIAC	Coeliac disease || id:finn-b-K11_COELIAC	IL1R1	MR Egger	18.0902	17	0.383173
prot-a-1496	finn-b-K11_COELIAC	Coeliac disease || id:finn-b-K11_COELIAC	IL1R1	Inverse variance weighted	18.0948	18	0.449422
prot-a-1495	finn-b-K11_COELIAC	Coeliac disease || id:finn-b-K11_COELIAC	IL1B	MR Egger	8.1202	11	0.702498
prot-a-1495	finn-b-K11_COELIAC	Coeliac disease || id:finn-b-K11_COELIAC	IL1B	Inverse variance weighted	8.50221	12	0.744757
prot-a-1494	finn-b-K11_COELIAC	Coeliac disease || id:finn-b-K11_COELIAC	IL1A	MR Egger	15.8516	13	0.257234
prot-a-1494	finn-b-K11_COELIAC	Coeliac disease || id:finn-b-K11_COELIAC	IL1A	Inverse variance weighted	16.4355	14	0.287506
prot-a-1493	finn-b-K11_COELIAC	Coeliac disease || id:finn-b-K11_COELIAC	IL19	MR Egger	19.9919	13	0.0954125
prot-a-1493	finn-b-K11_COELIAC	Coeliac disease || id:finn-b-K11_COELIAC	IL19	Inverse variance weighted	22.3302	14	0.0720789
prot-a-1491	finn-b-K11_COELIAC	Coeliac disease || id:finn-b-K11_COELIAC	IL18R1	MR Egger	5.48629	12	0.939737
prot-a-1491	finn-b-K11_COELIAC	Coeliac disease || id:finn-b-K11_COELIAC	IL18R1	Inverse variance weighted	5.85897	13	0.951135
prot-a-1490	finn-b-K11_COELIAC	Coeliac disease || id:finn-b-K11_COELIAC	IL18BP	MR Egger	9.71021	10	0.466275
prot-a-1490	finn-b-K11_COELIAC	Coeliac disease || id:finn-b-K11_COELIAC	IL18BP	Inverse variance weighted	10.2092	11	0.511674
prot-a-1479	finn-b-K11_COELIAC	Coeliac disease || id:finn-b-K11_COELIAC	IL16	MR Egger	39.7402	17	0.00140795
prot-a-1479	finn-b-K11_COELIAC	Coeliac disease || id:finn-b-K11_COELIAC	IL16	Inverse variance weighted	40.2407	18	0.00193531
prot-a-1475	finn-b-K11_COELIAC	Coeliac disease || id:finn-b-K11_COELIAC	IL13	MR Egger	20.2252	11	0.0423468
prot-a-1475	finn-b-K11_COELIAC	Coeliac disease || id:finn-b-K11_COELIAC	IL13	Inverse variance weighted	20.288	12	0.0618305
prot-a-1471	finn-b-K11_COELIAC	Coeliac disease || id:finn-b-K11_COELIAC	IL23	MR Egger	45.9576	14	2.84886e-05
prot-a-1471	finn-b-K11_COELIAC	Coeliac disease || id:finn-b-K11_COELIAC	IL23	Inverse variance weighted	46.5868	15	4.28706e-05
prot-a-1468	finn-b-K11_COELIAC	Coeliac disease || id:finn-b-K11_COELIAC	IL12	MR Egger	13.384	15	0.572662
prot-a-1468	finn-b-K11_COELIAC	Coeliac disease || id:finn-b-K11_COELIAC	IL12	Inverse variance weighted	15.5819	16	0.4825
prot-a-1467	finn-b-K11_COELIAC	Coeliac disease || id:finn-b-K11_COELIAC	IL11RA	MR Egger	10.2165	8	0.250158
prot-a-1467	finn-b-K11_COELIAC	Coeliac disease || id:finn-b-K11_COELIAC	IL11RA	Inverse variance weighted	13.7305	9	0.13224
prot-a-1466	finn-b-K11_COELIAC	Coeliac disease || id:finn-b-K11_COELIAC	IL11	MR Egger	17.1948	11	0.102245
prot-a-1466	finn-b-K11_COELIAC	Coeliac disease || id:finn-b-K11_COELIAC	IL11	Inverse variance weighted	17.4586	12	0.133147
prot-a-1465	finn-b-K11_COELIAC	Coeliac disease || id:finn-b-K11_COELIAC	IL10RB	MR Egger	4.80938	12	0.964045
prot-a-1465	finn-b-K11_COELIAC	Coeliac disease || id:finn-b-K11_COELIAC	IL10RB	Inverse variance weighted	7.99278	13	0.84407
prot-a-1464	finn-b-K11_COELIAC	Coeliac disease || id:finn-b-K11_COELIAC	IL10	MR Egger	1.94795	6	0.924423
prot-a-1464	finn-b-K11_COELIAC	Coeliac disease || id:finn-b-K11_COELIAC	IL10	Inverse variance weighted	4.30103	7	0.744525
prot-a-2965	finn-b-K11_COELIAC	Coeliac disease || id:finn-b-K11_COELIAC	TGFB3	MR Egger	8.59035	11	0.659646
prot-a-2965	finn-b-K11_COELIAC	Coeliac disease || id:finn-b-K11_COELIAC	TGFB3	Inverse variance weighted	9.43955	12	0.664999
prot-a-2964	finn-b-K11_COELIAC	Coeliac disease || id:finn-b-K11_COELIAC	TGFB2	MR Egger	10.8896	12	0.538407
prot-a-2964	finn-b-K11_COELIAC	Coeliac disease || id:finn-b-K11_COELIAC	TGFB2	Inverse variance weighted	10.9507	13	0.614946
prot-a-2962	finn-b-K11_COELIAC	Coeliac disease || id:finn-b-K11_COELIAC	TGFB1	MR Egger	8.47825	8	0.388199
prot-a-2962	finn-b-K11_COELIAC	Coeliac disease || id:finn-b-K11_COELIAC	TGFB1	Inverse variance weighted	11.7121	9	0.230031
prot-a-2961	finn-b-K11_COELIAC	Coeliac disease || id:finn-b-K11_COELIAC	TGFA	MR Egger	3.27628	7	0.858322
prot-a-2961	finn-b-K11_COELIAC	Coeliac disease || id:finn-b-K11_COELIAC	TGFA	Inverse variance weighted	3.66905	8	0.885681
prot-a-411	finn-b-K11_COELIAC	Coeliac disease || id:finn-b-K11_COELIAC	CCL8	MR Egger	13.3065	13	0.424423
prot-a-411	finn-b-K11_COELIAC	Coeliac disease || id:finn-b-K11_COELIAC	CCL8	Inverse variance weighted	13.4449	14	0.491827
prot-a-410	finn-b-K11_COELIAC	Coeliac disease || id:finn-b-K11_COELIAC	CCL7	MR Egger	10.9131	15	0.758729
prot-a-410	finn-b-K11_COELIAC	Coeliac disease || id:finn-b-K11_COELIAC	CCL7	Inverse variance weighted	10.926	16	0.814031
prot-a-409	finn-b-K11_COELIAC	Coeliac disease || id:finn-b-K11_COELIAC	CCL5	MR Egger	16.4047	14	0.289288
prot-a-409	finn-b-K11_COELIAC	Coeliac disease || id:finn-b-K11_COELIAC	CCL5	Inverse variance weighted	17.1211	15	0.311675
prot-a-398	finn-b-K11_COELIAC	Coeliac disease || id:finn-b-K11_COELIAC	CCL22	MR Egger	9.95421	14	0.765524
prot-a-398	finn-b-K11_COELIAC	Coeliac disease || id:finn-b-K11_COELIAC	CCL22	Inverse variance weighted	10.4047	15	0.793543
prot-a-396	finn-b-K11_COELIAC	Coeliac disease || id:finn-b-K11_COELIAC	CCL20	MR Egger	11.7895	7	0.107696
prot-a-396	finn-b-K11_COELIAC	Coeliac disease || id:finn-b-K11_COELIAC	CCL20	Inverse variance weighted	11.8363	8	0.158658
prot-a-407	finn-b-K11_COELIAC	Coeliac disease || id:finn-b-K11_COELIAC	CCL3	MR Egger	13.032	11	0.291238
prot-a-407	finn-b-K11_COELIAC	Coeliac disease || id:finn-b-K11_COELIAC	CCL3	Inverse variance weighted	13.0521	12	0.365268
prot-a-394	finn-b-K11_COELIAC	Coeliac disease || id:finn-b-K11_COELIAC	CCL17	MR Egger	20.3083	15	0.160422
prot-a-394	finn-b-K11_COELIAC	Coeliac disease || id:finn-b-K11_COELIAC	CCL17	Inverse variance weighted	20.4863	16	0.199114
prot-a-389	finn-b-K11_COELIAC	Coeliac disease || id:finn-b-K11_COELIAC	CCL13	MR Egger	18.4477	17	0.361141
prot-a-389	finn-b-K11_COELIAC	Coeliac disease || id:finn-b-K11_COELIAC	CCL13	Inverse variance weighted	18.504	18	0.422942
prot-a-388	finn-b-K11_COELIAC	Coeliac disease || id:finn-b-K11_COELIAC	CCL1	MR Egger	15.4623	11	0.162296
prot-a-388	finn-b-K11_COELIAC	Coeliac disease || id:finn-b-K11_COELIAC	CCL1	Inverse variance weighted	15.9125	12	0.195278
prot-a-745	finn-b-K11_COELIAC	Coeliac disease || id:finn-b-K11_COELIAC	CXCL16	MR Egger	330.987	21	1.50215e-57
prot-a-745	finn-b-K11_COELIAC	Coeliac disease || id:finn-b-K11_COELIAC	CXCL16	Inverse variance weighted	331.927	22	3.8912e-57
prot-a-750	finn-b-K11_COELIAC	Coeliac disease || id:finn-b-K11_COELIAC	CXCL9	MR Egger	12.979	8	0.112576
prot-a-750	finn-b-K11_COELIAC	Coeliac disease || id:finn-b-K11_COELIAC	CXCL9	Inverse variance weighted	16.5995	9	0.0553695
prot-a-744	finn-b-K11_COELIAC	Coeliac disease || id:finn-b-K11_COELIAC	CXCL14	MR Egger	11.5275	9	0.241274
prot-a-744	finn-b-K11_COELIAC	Coeliac disease || id:finn-b-K11_COELIAC	CXCL14	Inverse variance weighted	14.8348	10	0.138203
prot-a-743	finn-b-K11_COELIAC	Coeliac disease || id:finn-b-K11_COELIAC	CXCL13	MR Egger	11.0388	14	0.682983
prot-a-743	finn-b-K11_COELIAC	Coeliac disease || id:finn-b-K11_COELIAC	CXCL13	Inverse variance weighted	11.4518	15	0.71996
prot-a-748	finn-b-K11_COELIAC	Coeliac disease || id:finn-b-K11_COELIAC	CXCL5	MR Egger	11.1862	10	0.343198
prot-a-748	finn-b-K11_COELIAC	Coeliac disease || id:finn-b-K11_COELIAC	CXCL5	Inverse variance weighted	11.1871	11	0.427722
prot-a-739	finn-b-K11_COELIAC	Coeliac disease || id:finn-b-K11_COELIAC	CXCL11	MR Egger	41.982	12	3.35378e-05
prot-a-739	finn-b-K11_COELIAC	Coeliac disease || id:finn-b-K11_COELIAC	CXCL11	Inverse variance weighted	49.2796	13	3.96092e-06
prot-a-738	finn-b-K11_COELIAC	Coeliac disease || id:finn-b-K11_COELIAC	CXCL10	MR Egger	7.77581	4	0.100145
prot-a-738	finn-b-K11_COELIAC	Coeliac disease || id:finn-b-K11_COELIAC	CXCL10	Inverse variance weighted	7.82102	5	0.166379
prot-a-682	finn-b-K11_COELIAC	Coeliac disease || id:finn-b-K11_COELIAC	CSF2RA	MR Egger	14.6709	9	0.100383
prot-a-682	finn-b-K11_COELIAC	Coeliac disease || id:finn-b-K11_COELIAC	CSF2RA	Inverse variance weighted	16.1084	10	0.0965719
prot-a-681	finn-b-K11_COELIAC	Coeliac disease || id:finn-b-K11_COELIAC	GM-CSF	MR Egger	2.34199	7	0.938518
prot-a-681	finn-b-K11_COELIAC	Coeliac disease || id:finn-b-K11_COELIAC	GM-CSF	Inverse variance weighted	2.43381	8	0.964746
prot-a-686	finn-b-K11_COELIAC	Coeliac disease || id:finn-b-K11_COELIAC	GCSFR	MR Egger	4.11258	6	0.661444
prot-a-686	finn-b-K11_COELIAC	Coeliac disease || id:finn-b-K11_COELIAC	GCSFR	Inverse variance weighted	4.3628	7	0.737169
prot-a-685	finn-b-K11_COELIAC	Coeliac disease || id:finn-b-K11_COELIAC	GCSF	MR Egger	3.05075	6	0.802451
prot-a-685	finn-b-K11_COELIAC	Coeliac disease || id:finn-b-K11_COELIAC	GCSF	Inverse variance weighted	3.16687	7	0.869148
prot-a-680	finn-b-K11_COELIAC	Coeliac disease || id:finn-b-K11_COELIAC	MCSF	MR Egger	9.28215	5	0.0983258
prot-a-680	finn-b-K11_COELIAC	Coeliac disease || id:finn-b-K11_COELIAC	MCSF	Inverse variance weighted	10.1663	6	0.117819
prot-a-2982	finn-b-AUTOIMMUNE	Autoimmune diseases || id:finn-b-AUTOIMMUNE	TIRAP	MR Egger	21.2297	12	0.047116
prot-a-2982	finn-b-AUTOIMMUNE	Autoimmune diseases || id:finn-b-AUTOIMMUNE	TIRAP	Inverse variance weighted	22.6978	13	0.0454496
prot-a-1547	finn-b-AUTOIMMUNE	Autoimmune diseases || id:finn-b-AUTOIMMUNE	ILF3	MR Egger	7.85674	5	0.16431
prot-a-1547	finn-b-AUTOIMMUNE	Autoimmune diseases || id:finn-b-AUTOIMMUNE	ILF3	Inverse variance weighted	10.0608	6	0.122117
prot-a-749	finn-b-AUTOIMMUNE	Autoimmune diseases || id:finn-b-AUTOIMMUNE	IL8	MR Egger	12.199	13	0.511399
prot-a-749	finn-b-AUTOIMMUNE	Autoimmune diseases || id:finn-b-AUTOIMMUNE	IL8	Inverse variance weighted	12.2397	14	0.587058
prot-a-1545	finn-b-AUTOIMMUNE	Autoimmune diseases || id:finn-b-AUTOIMMUNE	IL9	MR Egger	12.3169	9	0.196028
prot-a-1545	finn-b-AUTOIMMUNE	Autoimmune diseases || id:finn-b-AUTOIMMUNE	IL9	Inverse variance weighted	12.3708	10	0.261009
prot-a-1544	finn-b-AUTOIMMUNE	Autoimmune diseases || id:finn-b-AUTOIMMUNE	IL7RA	MR Egger	39.8444	11	3.80347e-05
prot-a-1544	finn-b-AUTOIMMUNE	Autoimmune diseases || id:finn-b-AUTOIMMUNE	IL7RA	Inverse variance weighted	39.8942	12	7.48736e-05
prot-a-1543	finn-b-AUTOIMMUNE	Autoimmune diseases || id:finn-b-AUTOIMMUNE	IL7	MR Egger	24.7531	16	0.074297
prot-a-1543	finn-b-AUTOIMMUNE	Autoimmune diseases || id:finn-b-AUTOIMMUNE	IL7	Inverse variance weighted	25.1213	17	0.0920266
prot-a-1542	finn-b-AUTOIMMUNE	Autoimmune diseases || id:finn-b-AUTOIMMUNE	IL6RB	MR Egger	14.8392	12	0.250349
prot-a-1542	finn-b-AUTOIMMUNE	Autoimmune diseases || id:finn-b-AUTOIMMUNE	IL6RB	Inverse variance weighted	15.3964	13	0.283262
prot-a-1540	finn-b-AUTOIMMUNE	Autoimmune diseases || id:finn-b-AUTOIMMUNE	IL6RA	MR Egger	4.77974	7	0.686822
prot-a-1540	finn-b-AUTOIMMUNE	Autoimmune diseases || id:finn-b-AUTOIMMUNE	IL6RA	Inverse variance weighted	5.01471	8	0.756003
prot-a-1538	finn-b-AUTOIMMUNE	Autoimmune diseases || id:finn-b-AUTOIMMUNE	IL6	MR Egger	7.48809	11	0.758292
prot-a-1538	finn-b-AUTOIMMUNE	Autoimmune diseases || id:finn-b-AUTOIMMUNE	IL6	Inverse variance weighted	8.88907	12	0.712375
prot-a-1536	finn-b-AUTOIMMUNE	Autoimmune diseases || id:finn-b-AUTOIMMUNE	IL5RA	MR Egger	20.6431	7	0.00433589
prot-a-1536	finn-b-AUTOIMMUNE	Autoimmune diseases || id:finn-b-AUTOIMMUNE	IL5RA	Inverse variance weighted	22.795	8	0.00363771
prot-a-1534	finn-b-AUTOIMMUNE	Autoimmune diseases || id:finn-b-AUTOIMMUNE	IL5	MR Egger	12.9465	8	0.113702
prot-a-1534	finn-b-AUTOIMMUNE	Autoimmune diseases || id:finn-b-AUTOIMMUNE	IL5	Inverse variance weighted	12.947	9	0.165017
prot-a-1533	finn-b-AUTOIMMUNE	Autoimmune diseases || id:finn-b-AUTOIMMUNE	IL4RA	MR Egger	3.36622	8	0.909321
prot-a-1533	finn-b-AUTOIMMUNE	Autoimmune diseases || id:finn-b-AUTOIMMUNE	IL4RA	Inverse variance weighted	6.54847	9	0.684015
prot-a-1532	finn-b-AUTOIMMUNE	Autoimmune diseases || id:finn-b-AUTOIMMUNE	IL4	MR Egger	31.8542	15	0.00673875
prot-a-1532	finn-b-AUTOIMMUNE	Autoimmune diseases || id:finn-b-AUTOIMMUNE	IL4	Inverse variance weighted	31.8921	16	0.0103281
prot-a-1530	finn-b-AUTOIMMUNE	Autoimmune diseases || id:finn-b-AUTOIMMUNE	IL3RA	MR Egger	40.0758	13	0.000134406
prot-a-1530	finn-b-AUTOIMMUNE	Autoimmune diseases || id:finn-b-AUTOIMMUNE	IL3RA	Inverse variance weighted	40.2391	14	0.000234108
prot-a-1529	finn-b-AUTOIMMUNE	Autoimmune diseases || id:finn-b-AUTOIMMUNE	IL37	MR Egger	9.36771	11	0.587991
prot-a-1529	finn-b-AUTOIMMUNE	Autoimmune diseases || id:finn-b-AUTOIMMUNE	IL37	Inverse variance weighted	12.4798	12	0.407953
prot-a-1528	finn-b-AUTOIMMUNE	Autoimmune diseases || id:finn-b-AUTOIMMUNE	IL36 gamma	MR Egger	9.32135	8	0.315917
prot-a-1528	finn-b-AUTOIMMUNE	Autoimmune diseases || id:finn-b-AUTOIMMUNE	IL36 gamma	Inverse variance weighted	10.7144	9	0.295796
prot-a-1527	finn-b-AUTOIMMUNE	Autoimmune diseases || id:finn-b-AUTOIMMUNE	IL36 beta	MR Egger	12.0856	13	0.520639
prot-a-1527	finn-b-AUTOIMMUNE	Autoimmune diseases || id:finn-b-AUTOIMMUNE	IL36 beta	Inverse variance weighted	12.1164	14	0.596957
prot-a-1526	finn-b-AUTOIMMUNE	Autoimmune diseases || id:finn-b-AUTOIMMUNE	IL36 alpha	MR Egger	696.521	10	3.50563e-143
prot-a-1526	finn-b-AUTOIMMUNE	Autoimmune diseases || id:finn-b-AUTOIMMUNE	IL36 alpha	Inverse variance weighted	781.041	11	2.22626e-160
prot-a-1525	finn-b-AUTOIMMUNE	Autoimmune diseases || id:finn-b-AUTOIMMUNE	IL3	MR Egger	2.16043	7	0.95043
prot-a-1525	finn-b-AUTOIMMUNE	Autoimmune diseases || id:finn-b-AUTOIMMUNE	IL3	Inverse variance weighted	6.59824	8	0.580532
prot-a-1524	finn-b-AUTOIMMUNE	Autoimmune diseases || id:finn-b-AUTOIMMUNE	IL34	MR Egger	28.014	17	0.044775
prot-a-1524	finn-b-AUTOIMMUNE	Autoimmune diseases || id:finn-b-AUTOIMMUNE	IL34	Inverse variance weighted	28.9309	18	0.0492307
prot-a-1523	finn-b-AUTOIMMUNE	Autoimmune diseases || id:finn-b-AUTOIMMUNE	IL32	MR Egger	21.0411	12	0.0497818
prot-a-1523	finn-b-AUTOIMMUNE	Autoimmune diseases || id:finn-b-AUTOIMMUNE	IL32	Inverse variance weighted	21.1097	13	0.0707872
prot-a-1521	finn-b-AUTOIMMUNE	Autoimmune diseases || id:finn-b-AUTOIMMUNE	IL31	MR Egger	16.197	10	0.094131
prot-a-1521	finn-b-AUTOIMMUNE	Autoimmune diseases || id:finn-b-AUTOIMMUNE	IL31	Inverse variance weighted	24.6063	11	0.0104056
prot-a-1519	finn-b-AUTOIMMUNE	Autoimmune diseases || id:finn-b-AUTOIMMUNE	IL2RB	MR Egger	218.796	11	9.20176e-41
prot-a-1519	finn-b-AUTOIMMUNE	Autoimmune diseases || id:finn-b-AUTOIMMUNE	IL2RB	Inverse variance weighted	229.747	12	2.25017e-42
prot-a-1518	finn-b-AUTOIMMUNE	Autoimmune diseases || id:finn-b-AUTOIMMUNE	IL2RA	MR Egger	0.408442	6	0.998781
prot-a-1518	finn-b-AUTOIMMUNE	Autoimmune diseases || id:finn-b-AUTOIMMUNE	IL2RA	Inverse variance weighted	0.9319	7	0.995854
prot-a-1517	finn-b-AUTOIMMUNE	Autoimmune diseases || id:finn-b-AUTOIMMUNE	IL27RA	MR Egger	7.07862	10	0.718003
prot-a-1517	finn-b-AUTOIMMUNE	Autoimmune diseases || id:finn-b-AUTOIMMUNE	IL27RA	Inverse variance weighted	8.99404	11	0.622443
prot-a-1516	finn-b-AUTOIMMUNE	Autoimmune diseases || id:finn-b-AUTOIMMUNE	IL27	MR Egger	27.2696	17	0.05423
prot-a-1516	finn-b-AUTOIMMUNE	Autoimmune diseases || id:finn-b-AUTOIMMUNE	IL27	Inverse variance weighted	29.9696	18	0.0377433
prot-a-1515	finn-b-AUTOIMMUNE	Autoimmune diseases || id:finn-b-AUTOIMMUNE	IL25	MR Egger	12.674	13	0.473299
prot-a-1515	finn-b-AUTOIMMUNE	Autoimmune diseases || id:finn-b-AUTOIMMUNE	IL25	Inverse variance weighted	13.1285	14	0.516435
prot-a-1514	finn-b-AUTOIMMUNE	Autoimmune diseases || id:finn-b-AUTOIMMUNE	IL24	MR Egger	11.0042	14	0.685708
prot-a-1514	finn-b-AUTOIMMUNE	Autoimmune diseases || id:finn-b-AUTOIMMUNE	IL24	Inverse variance weighted	11.0175	15	0.751352
prot-a-1512	finn-b-AUTOIMMUNE	Autoimmune diseases || id:finn-b-AUTOIMMUNE	IL2	MR Egger	22.0647	17	0.182243
prot-a-1512	finn-b-AUTOIMMUNE	Autoimmune diseases || id:finn-b-AUTOIMMUNE	IL2	Inverse variance weighted	33.4206	18	0.014837
prot-a-1507	finn-b-AUTOIMMUNE	Autoimmune diseases || id:finn-b-AUTOIMMUNE	IL22	MR Egger	23.0373	14	0.0596659
prot-a-1507	finn-b-AUTOIMMUNE	Autoimmune diseases || id:finn-b-AUTOIMMUNE	IL22	Inverse variance weighted	23.5571	15	0.0730072
prot-a-1506	finn-b-AUTOIMMUNE	Autoimmune diseases || id:finn-b-AUTOIMMUNE	IL21	MR Egger	94.2226	14	6.01101e-14
prot-a-1506	finn-b-AUTOIMMUNE	Autoimmune diseases || id:finn-b-AUTOIMMUNE	IL21	Inverse variance weighted	96.1946	15	6.8356e-14
prot-a-1505	finn-b-AUTOIMMUNE	Autoimmune diseases || id:finn-b-AUTOIMMUNE	IL20	MR Egger	2.36173	3	0.500798
prot-a-1505	finn-b-AUTOIMMUNE	Autoimmune diseases || id:finn-b-AUTOIMMUNE	IL20	Inverse variance weighted	8.43271	4	0.0769532
prot-a-1504	finn-b-AUTOIMMUNE	Autoimmune diseases || id:finn-b-AUTOIMMUNE	IL1RN	MR Egger	20.9986	13	0.0729562
prot-a-1504	finn-b-AUTOIMMUNE	Autoimmune diseases || id:finn-b-AUTOIMMUNE	IL1RN	Inverse variance weighted	21.0608	14	0.100085
prot-a-1503	finn-b-AUTOIMMUNE	Autoimmune diseases || id:finn-b-AUTOIMMUNE	IL1RL2	MR Egger	8.28986	9	0.50522
prot-a-1503	finn-b-AUTOIMMUNE	Autoimmune diseases || id:finn-b-AUTOIMMUNE	IL1RL2	Inverse variance weighted	8.49566	10	0.580539
prot-a-1502	finn-b-AUTOIMMUNE	Autoimmune diseases || id:finn-b-AUTOIMMUNE	IL1RL1	MR Egger	17.221	14	0.244591
prot-a-1502	finn-b-AUTOIMMUNE	Autoimmune diseases || id:finn-b-AUTOIMMUNE	IL1RL1	Inverse variance weighted	17.2428	15	0.304557
prot-a-1501	finn-b-AUTOIMMUNE	Autoimmune diseases || id:finn-b-AUTOIMMUNE	IL1RAPL2	MR Egger	12.3159	11	0.340372
prot-a-1501	finn-b-AUTOIMMUNE	Autoimmune diseases || id:finn-b-AUTOIMMUNE	IL1RAPL2	Inverse variance weighted	17.1566	12	0.1438
prot-a-1499	finn-b-AUTOIMMUNE	Autoimmune diseases || id:finn-b-AUTOIMMUNE	IL1RAP	MR Egger	5.73591	11	0.890391
prot-a-1499	finn-b-AUTOIMMUNE	Autoimmune diseases || id:finn-b-AUTOIMMUNE	IL1RAP	Inverse variance weighted	14.2139	12	0.287258
prot-a-1497	finn-b-AUTOIMMUNE	Autoimmune diseases || id:finn-b-AUTOIMMUNE	IL1R2	MR Egger	9.17607	10	0.51548
prot-a-1497	finn-b-AUTOIMMUNE	Autoimmune diseases || id:finn-b-AUTOIMMUNE	IL1R2	Inverse variance weighted	9.4583	11	0.579667
prot-a-1496	finn-b-AUTOIMMUNE	Autoimmune diseases || id:finn-b-AUTOIMMUNE	IL1R1	MR Egger	15.1725	17	0.583061
prot-a-1496	finn-b-AUTOIMMUNE	Autoimmune diseases || id:finn-b-AUTOIMMUNE	IL1R1	Inverse variance weighted	15.1748	18	0.649932
prot-a-1495	finn-b-AUTOIMMUNE	Autoimmune diseases || id:finn-b-AUTOIMMUNE	IL1B	MR Egger	12.4401	11	0.33149
prot-a-1495	finn-b-AUTOIMMUNE	Autoimmune diseases || id:finn-b-AUTOIMMUNE	IL1B	Inverse variance weighted	13.8235	12	0.312119
prot-a-1494	finn-b-AUTOIMMUNE	Autoimmune diseases || id:finn-b-AUTOIMMUNE	IL1A	MR Egger	11.3445	13	0.581979
prot-a-1494	finn-b-AUTOIMMUNE	Autoimmune diseases || id:finn-b-AUTOIMMUNE	IL1A	Inverse variance weighted	11.6312	14	0.635895
prot-a-1493	finn-b-AUTOIMMUNE	Autoimmune diseases || id:finn-b-AUTOIMMUNE	IL19	MR Egger	40.1059	13	0.000132912
prot-a-1493	finn-b-AUTOIMMUNE	Autoimmune diseases || id:finn-b-AUTOIMMUNE	IL19	Inverse variance weighted	41.0628	14	0.000173871
prot-a-1491	finn-b-AUTOIMMUNE	Autoimmune diseases || id:finn-b-AUTOIMMUNE	IL18R1	MR Egger	11.6154	12	0.477038
prot-a-1491	finn-b-AUTOIMMUNE	Autoimmune diseases || id:finn-b-AUTOIMMUNE	IL18R1	Inverse variance weighted	13.8217	13	0.386518
prot-a-1490	finn-b-AUTOIMMUNE	Autoimmune diseases || id:finn-b-AUTOIMMUNE	IL18BP	MR Egger	11.4711	10	0.322007
prot-a-1490	finn-b-AUTOIMMUNE	Autoimmune diseases || id:finn-b-AUTOIMMUNE	IL18BP	Inverse variance weighted	12.3023	11	0.341355
prot-a-1479	finn-b-AUTOIMMUNE	Autoimmune diseases || id:finn-b-AUTOIMMUNE	IL16	MR Egger	10.9833	17	0.85743
prot-a-1479	finn-b-AUTOIMMUNE	Autoimmune diseases || id:finn-b-AUTOIMMUNE	IL16	Inverse variance weighted	13.6585	18	0.751065
prot-a-1475	finn-b-AUTOIMMUNE	Autoimmune diseases || id:finn-b-AUTOIMMUNE	IL13	MR Egger	15.3605	11	0.16658
prot-a-1475	finn-b-AUTOIMMUNE	Autoimmune diseases || id:finn-b-AUTOIMMUNE	IL13	Inverse variance weighted	15.5811	12	0.211184
prot-a-1471	finn-b-AUTOIMMUNE	Autoimmune diseases || id:finn-b-AUTOIMMUNE	IL23	MR Egger	55.3083	14	7.66362e-07
prot-a-1471	finn-b-AUTOIMMUNE	Autoimmune diseases || id:finn-b-AUTOIMMUNE	IL23	Inverse variance weighted	55.6524	15	1.38696e-06
prot-a-1468	finn-b-AUTOIMMUNE	Autoimmune diseases || id:finn-b-AUTOIMMUNE	IL12	MR Egger	14.081	15	0.519397
prot-a-1468	finn-b-AUTOIMMUNE	Autoimmune diseases || id:finn-b-AUTOIMMUNE	IL12	Inverse variance weighted	14.7914	16	0.539969
prot-a-1467	finn-b-AUTOIMMUNE	Autoimmune diseases || id:finn-b-AUTOIMMUNE	IL11RA	MR Egger	1.98995	8	0.981319
prot-a-1467	finn-b-AUTOIMMUNE	Autoimmune diseases || id:finn-b-AUTOIMMUNE	IL11RA	Inverse variance weighted	4.4661	9	0.878151
prot-a-1466	finn-b-AUTOIMMUNE	Autoimmune diseases || id:finn-b-AUTOIMMUNE	IL11	MR Egger	11.9111	11	0.370365
prot-a-1466	finn-b-AUTOIMMUNE	Autoimmune diseases || id:finn-b-AUTOIMMUNE	IL11	Inverse variance weighted	16.6822	12	0.161948
prot-a-1465	finn-b-AUTOIMMUNE	Autoimmune diseases || id:finn-b-AUTOIMMUNE	IL10RB	MR Egger	6.74119	12	0.874232
prot-a-1465	finn-b-AUTOIMMUNE	Autoimmune diseases || id:finn-b-AUTOIMMUNE	IL10RB	Inverse variance weighted	6.88982	13	0.90774
prot-a-1464	finn-b-AUTOIMMUNE	Autoimmune diseases || id:finn-b-AUTOIMMUNE	IL10	MR Egger	5.04943	6	0.53749
prot-a-1464	finn-b-AUTOIMMUNE	Autoimmune diseases || id:finn-b-AUTOIMMUNE	IL10	Inverse variance weighted	5.819	7	0.561036
prot-a-2965	finn-b-AUTOIMMUNE	Autoimmune diseases || id:finn-b-AUTOIMMUNE	TGFB3	MR Egger	13.1764	11	0.281954
prot-a-2965	finn-b-AUTOIMMUNE	Autoimmune diseases || id:finn-b-AUTOIMMUNE	TGFB3	Inverse variance weighted	13.4431	12	0.337675
prot-a-2964	finn-b-AUTOIMMUNE	Autoimmune diseases || id:finn-b-AUTOIMMUNE	TGFB2	MR Egger	11.3314	12	0.50075
prot-a-2964	finn-b-AUTOIMMUNE	Autoimmune diseases || id:finn-b-AUTOIMMUNE	TGFB2	Inverse variance weighted	11.7598	13	0.547432
prot-a-2962	finn-b-AUTOIMMUNE	Autoimmune diseases || id:finn-b-AUTOIMMUNE	TGFB1	MR Egger	5.32566	8	0.722269
prot-a-2962	finn-b-AUTOIMMUNE	Autoimmune diseases || id:finn-b-AUTOIMMUNE	TGFB1	Inverse variance weighted	7.96566	9	0.537611
prot-a-2961	finn-b-AUTOIMMUNE	Autoimmune diseases || id:finn-b-AUTOIMMUNE	TGFA	MR Egger	8.49232	7	0.291187
prot-a-2961	finn-b-AUTOIMMUNE	Autoimmune diseases || id:finn-b-AUTOIMMUNE	TGFA	Inverse variance weighted	9.83545	8	0.276766
prot-a-411	finn-b-AUTOIMMUNE	Autoimmune diseases || id:finn-b-AUTOIMMUNE	CCL8	MR Egger	23.6981	13	0.0340232
prot-a-411	finn-b-AUTOIMMUNE	Autoimmune diseases || id:finn-b-AUTOIMMUNE	CCL8	Inverse variance weighted	26.1418	14	0.0248327
prot-a-410	finn-b-AUTOIMMUNE	Autoimmune diseases || id:finn-b-AUTOIMMUNE	CCL7	MR Egger	13.7502	15	0.544551
prot-a-410	finn-b-AUTOIMMUNE	Autoimmune diseases || id:finn-b-AUTOIMMUNE	CCL7	Inverse variance weighted	13.8239	16	0.611829
prot-a-409	finn-b-AUTOIMMUNE	Autoimmune diseases || id:finn-b-AUTOIMMUNE	CCL5	MR Egger	7.05931	14	0.932401
prot-a-409	finn-b-AUTOIMMUNE	Autoimmune diseases || id:finn-b-AUTOIMMUNE	CCL5	Inverse variance weighted	13.9506	15	0.529283
prot-a-398	finn-b-AUTOIMMUNE	Autoimmune diseases || id:finn-b-AUTOIMMUNE	CCL22	MR Egger	25.1813	14	0.0328191
prot-a-398	finn-b-AUTOIMMUNE	Autoimmune diseases || id:finn-b-AUTOIMMUNE	CCL22	Inverse variance weighted	25.2865	15	0.0462252
prot-a-396	finn-b-AUTOIMMUNE	Autoimmune diseases || id:finn-b-AUTOIMMUNE	CCL20	MR Egger	7.71947	7	0.35798
prot-a-396	finn-b-AUTOIMMUNE	Autoimmune diseases || id:finn-b-AUTOIMMUNE	CCL20	Inverse variance weighted	11.8571	8	0.157695
prot-a-407	finn-b-AUTOIMMUNE	Autoimmune diseases || id:finn-b-AUTOIMMUNE	CCL3	MR Egger	14.1485	11	0.224883
prot-a-407	finn-b-AUTOIMMUNE	Autoimmune diseases || id:finn-b-AUTOIMMUNE	CCL3	Inverse variance weighted	16.0953	12	0.186911
prot-a-394	finn-b-AUTOIMMUNE	Autoimmune diseases || id:finn-b-AUTOIMMUNE	CCL17	MR Egger	14.5345	15	0.485436
prot-a-394	finn-b-AUTOIMMUNE	Autoimmune diseases || id:finn-b-AUTOIMMUNE	CCL17	Inverse variance weighted	16.0551	16	0.449124
prot-a-389	finn-b-AUTOIMMUNE	Autoimmune diseases || id:finn-b-AUTOIMMUNE	CCL13	MR Egger	27.9684	17	0.0453094
prot-a-389	finn-b-AUTOIMMUNE	Autoimmune diseases || id:finn-b-AUTOIMMUNE	CCL13	Inverse variance weighted	29.3682	18	0.0440607
prot-a-388	finn-b-AUTOIMMUNE	Autoimmune diseases || id:finn-b-AUTOIMMUNE	CCL1	MR Egger	6.51738	11	0.836713
prot-a-388	finn-b-AUTOIMMUNE	Autoimmune diseases || id:finn-b-AUTOIMMUNE	CCL1	Inverse variance weighted	14.1103	12	0.293722
prot-a-745	finn-b-AUTOIMMUNE	Autoimmune diseases || id:finn-b-AUTOIMMUNE	CXCL16	MR Egger	711.812	21	4.23597e-137
prot-a-745	finn-b-AUTOIMMUNE	Autoimmune diseases || id:finn-b-AUTOIMMUNE	CXCL16	Inverse variance weighted	735.515	22	2.47015e-141
prot-a-750	finn-b-AUTOIMMUNE	Autoimmune diseases || id:finn-b-AUTOIMMUNE	CXCL9	MR Egger	6.63029	8	0.576995
prot-a-750	finn-b-AUTOIMMUNE	Autoimmune diseases || id:finn-b-AUTOIMMUNE	CXCL9	Inverse variance weighted	6.66024	9	0.672446
prot-a-744	finn-b-AUTOIMMUNE	Autoimmune diseases || id:finn-b-AUTOIMMUNE	CXCL14	MR Egger	19.5871	9	0.0206389
prot-a-744	finn-b-AUTOIMMUNE	Autoimmune diseases || id:finn-b-AUTOIMMUNE	CXCL14	Inverse variance weighted	19.9199	10	0.0300192
prot-a-743	finn-b-AUTOIMMUNE	Autoimmune diseases || id:finn-b-AUTOIMMUNE	CXCL13	MR Egger	20.0332	14	0.129097
prot-a-743	finn-b-AUTOIMMUNE	Autoimmune diseases || id:finn-b-AUTOIMMUNE	CXCL13	Inverse variance weighted	26.6096	15	0.0320833
prot-a-748	finn-b-AUTOIMMUNE	Autoimmune diseases || id:finn-b-AUTOIMMUNE	CXCL5	MR Egger	9.57158	10	0.478848
prot-a-748	finn-b-AUTOIMMUNE	Autoimmune diseases || id:finn-b-AUTOIMMUNE	CXCL5	Inverse variance weighted	10.2652	11	0.506702
prot-a-739	finn-b-AUTOIMMUNE	Autoimmune diseases || id:finn-b-AUTOIMMUNE	CXCL11	MR Egger	201.609	12	1.518e-36
prot-a-739	finn-b-AUTOIMMUNE	Autoimmune diseases || id:finn-b-AUTOIMMUNE	CXCL11	Inverse variance weighted	266.108	13	2.86138e-49
prot-a-738	finn-b-AUTOIMMUNE	Autoimmune diseases || id:finn-b-AUTOIMMUNE	CXCL10	MR Egger	1.97366	4	0.740603
prot-a-738	finn-b-AUTOIMMUNE	Autoimmune diseases || id:finn-b-AUTOIMMUNE	CXCL10	Inverse variance weighted	2.65181	5	0.753478
prot-a-682	finn-b-AUTOIMMUNE	Autoimmune diseases || id:finn-b-AUTOIMMUNE	CSF2RA	MR Egger	4.20853	9	0.897159
prot-a-682	finn-b-AUTOIMMUNE	Autoimmune diseases || id:finn-b-AUTOIMMUNE	CSF2RA	Inverse variance weighted	4.2941	10	0.933106
prot-a-681	finn-b-AUTOIMMUNE	Autoimmune diseases || id:finn-b-AUTOIMMUNE	GM-CSF	MR Egger	2.20583	7	0.947575
prot-a-681	finn-b-AUTOIMMUNE	Autoimmune diseases || id:finn-b-AUTOIMMUNE	GM-CSF	Inverse variance weighted	3.49215	8	0.899798
prot-a-686	finn-b-AUTOIMMUNE	Autoimmune diseases || id:finn-b-AUTOIMMUNE	GCSFR	MR Egger	14.9718	6	0.0204775
prot-a-686	finn-b-AUTOIMMUNE	Autoimmune diseases || id:finn-b-AUTOIMMUNE	GCSFR	Inverse variance weighted	16.1509	7	0.0237728
prot-a-685	finn-b-AUTOIMMUNE	Autoimmune diseases || id:finn-b-AUTOIMMUNE	GCSF	MR Egger	11.176	6	0.0830883
prot-a-685	finn-b-AUTOIMMUNE	Autoimmune diseases || id:finn-b-AUTOIMMUNE	GCSF	Inverse variance weighted	11.2802	7	0.126856
prot-a-680	finn-b-AUTOIMMUNE	Autoimmune diseases || id:finn-b-AUTOIMMUNE	MCSF	MR Egger	5.37939	5	0.371352
prot-a-680	finn-b-AUTOIMMUNE	Autoimmune diseases || id:finn-b-AUTOIMMUNE	MCSF	Inverse variance weighted	6.09614	6	0.412507
AL amyloidosis	prot-a-2982	Toll/interleukin-1 receptor domain-containing adapter protein || id:prot-a-2982	TIRAP	MR Egger	4.21025	6	0.648248
AL amyloidosis	prot-a-2982	Toll/interleukin-1 receptor domain-containing adapter protein || id:prot-a-2982	TIRAP	Inverse variance weighted	4.21157	7	0.755111
AL amyloidosis	prot-a-1547	Interleukin enhancer-binding factor 3 || id:prot-a-1547	ILF3	MR Egger	2.67713	6	0.848141
AL amyloidosis	prot-a-1547	Interleukin enhancer-binding factor 3 || id:prot-a-1547	ILF3	Inverse variance weighted	4.07809	7	0.77074
AL amyloidosis	prot-a-749	Interleukin-8 || id:prot-a-749	IL8	MR Egger	4.67385	6	0.586271
AL amyloidosis	prot-a-749	Interleukin-8 || id:prot-a-749	IL8	Inverse variance weighted	4.92768	7	0.668789
AL amyloidosis	prot-a-1545	Interleukin-9 || id:prot-a-1545	IL9	MR Egger	2.838	6	0.828888
AL amyloidosis	prot-a-1545	Interleukin-9 || id:prot-a-1545	IL9	Inverse variance weighted	2.85153	7	0.898389
AL amyloidosis	prot-a-1544	Interleukin-7 receptor subunit alpha || id:prot-a-1544	IL7RA	MR Egger	2.70522	6	0.84483
AL amyloidosis	prot-a-1544	Interleukin-7 receptor subunit alpha || id:prot-a-1544	IL7RA	Inverse variance weighted	8.28559	7	0.308086
AL amyloidosis	prot-a-1543	Interleukin-7 || id:prot-a-1543	IL7	MR Egger	4.37088	6	0.626621
AL amyloidosis	prot-a-1543	Interleukin-7 || id:prot-a-1543	IL7	Inverse variance weighted	4.63889	7	0.703934
AL amyloidosis	prot-a-1542	Interleukin-6 receptor subunit beta || id:prot-a-1542	IL6RB	MR Egger	1.92842	6	0.926163
AL amyloidosis	prot-a-1542	Interleukin-6 receptor subunit beta || id:prot-a-1542	IL6RB	Inverse variance weighted	2.85491	7	0.898092
AL amyloidosis	prot-a-1540	Interleukin-6 receptor subunit alpha || id:prot-a-1540	IL6RA	MR Egger	3.76311	6	0.708698
AL amyloidosis	prot-a-1540	Interleukin-6 receptor subunit alpha || id:prot-a-1540	IL6RA	Inverse variance weighted	4.96249	7	0.664541
AL amyloidosis	prot-a-1538	Interleukin-6 || id:prot-a-1538	IL6	MR Egger	3.61237	6	0.728964
AL amyloidosis	prot-a-1538	Interleukin-6 || id:prot-a-1538	IL6	Inverse variance weighted	3.98372	7	0.78165
AL amyloidosis	prot-a-1536	Interleukin-5 receptor subunit alpha || id:prot-a-1536	IL5RA	MR Egger	19.4491	6	0.00346868
AL amyloidosis	prot-a-1536	Interleukin-5 receptor subunit alpha || id:prot-a-1536	IL5RA	Inverse variance weighted	22.7733	7	0.0018666
AL amyloidosis	prot-a-1534	Interleukin-5 || id:prot-a-1534	IL5	MR Egger	1.05682	6	0.983366
AL amyloidosis	prot-a-1534	Interleukin-5 || id:prot-a-1534	IL5	Inverse variance weighted	1.14084	7	0.992226
AL amyloidosis	prot-a-1533	Interleukin-4 receptor subunit alpha || id:prot-a-1533	IL4RA	MR Egger	1.56839	6	0.954823
AL amyloidosis	prot-a-1533	Interleukin-4 receptor subunit alpha || id:prot-a-1533	IL4RA	Inverse variance weighted	1.7779	7	0.971105
AL amyloidosis	prot-a-1532	Interleukin-4 || id:prot-a-1532	IL4	MR Egger	4.49094	6	0.610548
AL amyloidosis	prot-a-1532	Interleukin-4 || id:prot-a-1532	IL4	Inverse variance weighted	6.62849	7	0.468558
AL amyloidosis	prot-a-1530	Interleukin-3 receptor subunit alpha || id:prot-a-1530	IL3RA	MR Egger	2.80016	6	0.833478
AL amyloidosis	prot-a-1530	Interleukin-3 receptor subunit alpha || id:prot-a-1530	IL3RA	Inverse variance weighted	4.86774	7	0.6761
AL amyloidosis	prot-a-1529	Interleukin-37 || id:prot-a-1529	IL37	MR Egger	6.12812	6	0.408992
AL amyloidosis	prot-a-1529	Interleukin-37 || id:prot-a-1529	IL37	Inverse variance weighted	6.80239	7	0.449741
AL amyloidosis	prot-a-1528	Interleukin-36 gamma || id:prot-a-1528	IL36 gamma	MR Egger	11.8157	6	0.0662091
AL amyloidosis	prot-a-1528	Interleukin-36 gamma || id:prot-a-1528	IL36 gamma	Inverse variance weighted	15.2905	7	0.0324504
AL amyloidosis	prot-a-1527	Interleukin-36 beta || id:prot-a-1527	IL36 beta	MR Egger	2.3285	6	0.887146
AL amyloidosis	prot-a-1527	Interleukin-36 beta || id:prot-a-1527	IL36 beta	Inverse variance weighted	2.59857	7	0.919494
AL amyloidosis	prot-a-1526	Interleukin-36 alpha || id:prot-a-1526	IL36 alpha	MR Egger	6.06988	6	0.415408
AL amyloidosis	prot-a-1526	Interleukin-36 alpha || id:prot-a-1526	IL36 alpha	Inverse variance weighted	12.48	7	0.0858378
AL amyloidosis	prot-a-1525	Interleukin-3 || id:prot-a-1525	IL3	MR Egger	13.5856	6	0.0346237
AL amyloidosis	prot-a-1525	Interleukin-3 || id:prot-a-1525	IL3	Inverse variance weighted	18.8316	7	0.00873158
AL amyloidosis	prot-a-1524	Interleukin-34 || id:prot-a-1524	IL34	MR Egger	7.21992	6	0.300987
AL amyloidosis	prot-a-1524	Interleukin-34 || id:prot-a-1524	IL34	Inverse variance weighted	7.38823	7	0.389607
AL amyloidosis	prot-a-1523	Interleukin-32 || id:prot-a-1523	IL32	MR Egger	3.47174	6	0.747726
AL amyloidosis	prot-a-1523	Interleukin-32 || id:prot-a-1523	IL32	Inverse variance weighted	4.13577	7	0.764014
AL amyloidosis	prot-a-1521	Interleukin-31 || id:prot-a-1521	IL31	MR Egger	1.86447	6	0.931732
AL amyloidosis	prot-a-1521	Interleukin-31 || id:prot-a-1521	IL31	Inverse variance weighted	2.02307	7	0.958552
AL amyloidosis	prot-a-1519	Interleukin-2 receptor subunit beta || id:prot-a-1519	IL2RB	MR Egger	8.79031	6	0.185719
AL amyloidosis	prot-a-1519	Interleukin-2 receptor subunit beta || id:prot-a-1519	IL2RB	Inverse variance weighted	10.4151	7	0.166244
AL amyloidosis	prot-a-1518	Interleukin-2 receptor subunit alpha || id:prot-a-1518	IL2RA	MR Egger	7.80766	6	0.252536
AL amyloidosis	prot-a-1518	Interleukin-2 receptor subunit alpha || id:prot-a-1518	IL2RA	Inverse variance weighted	9.57121	7	0.214202
AL amyloidosis	prot-a-1517	Interleukin-27 receptor subunit alpha || id:prot-a-1517	IL27RA	MR Egger	11.0103	6	0.0880588
AL amyloidosis	prot-a-1517	Interleukin-27 receptor subunit alpha || id:prot-a-1517	IL27RA	Inverse variance weighted	11.1201	7	0.133468
AL amyloidosis	prot-a-1516	Interleukin-27 || id:prot-a-1516	IL27	MR Egger	6.69544	6	0.349933
AL amyloidosis	prot-a-1516	Interleukin-27 || id:prot-a-1516	IL27	Inverse variance weighted	6.84685	7	0.444999
AL amyloidosis	prot-a-1515	Interleukin-25 || id:prot-a-1515	IL25	MR Egger	7.64857	6	0.264997
AL amyloidosis	prot-a-1515	Interleukin-25 || id:prot-a-1515	IL25	Inverse variance weighted	9.40489	7	0.224878
AL amyloidosis	prot-a-1514	Interleukin-24 || id:prot-a-1514	IL24	MR Egger	13.1737	6	0.0403597
AL amyloidosis	prot-a-1514	Interleukin-24 || id:prot-a-1514	IL24	Inverse variance weighted	13.6251	7	0.0582656
AL amyloidosis	prot-a-1512	Interleukin-2 || id:prot-a-1512	IL2	MR Egger	7.00165	6	0.320694
AL amyloidosis	prot-a-1512	Interleukin-2 || id:prot-a-1512	IL2	Inverse variance weighted	7.56777	7	0.372244
AL amyloidosis	prot-a-1507	Interleukin-22 || id:prot-a-1507	IL22	MR Egger	4.30448	6	0.635546
AL amyloidosis	prot-a-1507	Interleukin-22 || id:prot-a-1507	IL22	Inverse variance weighted	6.08703	7	0.529625
AL amyloidosis	prot-a-1506	Interleukin-21 || id:prot-a-1506	IL21	MR Egger	4.01278	6	0.674947
AL amyloidosis	prot-a-1506	Interleukin-21 || id:prot-a-1506	IL21	Inverse variance weighted	4.06391	7	0.772388
AL amyloidosis	prot-a-1505	Interleukin-20 || id:prot-a-1505	IL20	MR Egger	1.98834	6	0.920767
AL amyloidosis	prot-a-1505	Interleukin-20 || id:prot-a-1505	IL20	Inverse variance weighted	5.22353	7	0.632706
AL amyloidosis	prot-a-1504	Interleukin-1 receptor antagonist protein || id:prot-a-1504	IL1RN	MR Egger	1.18873	6	0.977438
AL amyloidosis	prot-a-1504	Interleukin-1 receptor antagonist protein || id:prot-a-1504	IL1RN	Inverse variance weighted	1.79233	7	0.970436
AL amyloidosis	prot-a-1503	Interleukin-1 receptor-like 2 || id:prot-a-1503	IL1RL2	MR Egger	5.88277	6	0.43645
AL amyloidosis	prot-a-1503	Interleukin-1 receptor-like 2 || id:prot-a-1503	IL1RL2	Inverse variance weighted	11.9025	7	0.103811
AL amyloidosis	prot-a-1502	Interleukin-1 receptor-like 1 || id:prot-a-1502	IL1RL1	MR Egger	2.75251	6	0.839207
AL amyloidosis	prot-a-1502	Interleukin-1 receptor-like 1 || id:prot-a-1502	IL1RL1	Inverse variance weighted	4.61885	7	0.706363
AL amyloidosis	prot-a-1501	X-linked interleukin-1 receptor accessory protein-like 2 || id:prot-a-1501	IL1RAPL2	MR Egger	5.17304	6	0.521818
AL amyloidosis	prot-a-1501	X-linked interleukin-1 receptor accessory protein-like 2 || id:prot-a-1501	IL1RAPL2	Inverse variance weighted	5.48092	7	0.601487
AL amyloidosis	prot-a-1499	Interleukin-1 Receptor accessory protein || id:prot-a-1499	IL1RAP	MR Egger	6.21997	6	0.399006
AL amyloidosis	prot-a-1499	Interleukin-1 Receptor accessory protein || id:prot-a-1499	IL1RAP	Inverse variance weighted	6.49074	7	0.483753
AL amyloidosis	prot-a-1497	Interleukin-1 receptor type 2 || id:prot-a-1497	IL1R2	MR Egger	4.34777	6	0.629724
AL amyloidosis	prot-a-1497	Interleukin-1 receptor type 2 || id:prot-a-1497	IL1R2	Inverse variance weighted	4.38145	7	0.734941
AL amyloidosis	prot-a-1496	Interleukin-1 receptor type 1 || id:prot-a-1496	IL1R1	MR Egger	8.21552	6	0.222735
AL amyloidosis	prot-a-1496	Interleukin-1 receptor type 1 || id:prot-a-1496	IL1R1	Inverse variance weighted	9.37908	7	0.226573
AL amyloidosis	prot-a-1495	Interleukin-1 beta || id:prot-a-1495	IL1B	MR Egger	7.88769	6	0.246447
AL amyloidosis	prot-a-1495	Interleukin-1 beta || id:prot-a-1495	IL1B	Inverse variance weighted	11.6758	7	0.111736
AL amyloidosis	prot-a-1494	Interleukin-1 alpha || id:prot-a-1494	IL1A	MR Egger	8.5043	6	0.203434
AL amyloidosis	prot-a-1494	Interleukin-1 alpha || id:prot-a-1494	IL1A	Inverse variance weighted	9.66684	7	0.208252
AL amyloidosis	prot-a-1493	Interleukin-19 || id:prot-a-1493	IL19	MR Egger	8.45753	6	0.206462
AL amyloidosis	prot-a-1493	Interleukin-19 || id:prot-a-1493	IL19	Inverse variance weighted	8.89299	7	0.260431
AL amyloidosis	prot-a-1491	Interleukin-18 receptor 1 || id:prot-a-1491	IL18R1	MR Egger	11.0313	6	0.0874126
AL amyloidosis	prot-a-1491	Interleukin-18 receptor 1 || id:prot-a-1491	IL18R1	Inverse variance weighted	11.1822	7	0.130868
AL amyloidosis	prot-a-1490	Interleukin-18-binding protein || id:prot-a-1490	IL18BP	MR Egger	6.18719	6	0.402551
AL amyloidosis	prot-a-1490	Interleukin-18-binding protein || id:prot-a-1490	IL18BP	Inverse variance weighted	9.43124	7	0.223159
AL amyloidosis	prot-a-1479	Interleukin-16 || id:prot-a-1479	IL16	MR Egger	8.10528	6	0.230492
AL amyloidosis	prot-a-1479	Interleukin-16 || id:prot-a-1479	IL16	Inverse variance weighted	9.67185	7	0.207944
AL amyloidosis	prot-a-1475	Interleukin-13 || id:prot-a-1475	IL13	MR Egger	4.39443	6	0.62346
AL amyloidosis	prot-a-1475	Interleukin-13 || id:prot-a-1475	IL13	Inverse variance weighted	4.42626	7	0.729577
AL amyloidosis	prot-a-1471	Interleukin-23 || id:prot-a-1471	IL23	MR Egger	3.90811	6	0.68911
AL amyloidosis	prot-a-1471	Interleukin-23 || id:prot-a-1471	IL23	Inverse variance weighted	7.52731	7	0.376112
AL amyloidosis	prot-a-1468	Interleukin-12 || id:prot-a-1468	IL12	MR Egger	2.13595	6	0.90678
AL amyloidosis	prot-a-1468	Interleukin-12 || id:prot-a-1468	IL12	Inverse variance weighted	2.15733	7	0.950622
AL amyloidosis	prot-a-1467	Interleukin-11 receptor subunit alpha || id:prot-a-1467	IL11RA	MR Egger	1.59679	6	0.952808
AL amyloidosis	prot-a-1467	Interleukin-11 receptor subunit alpha || id:prot-a-1467	IL11RA	Inverse variance weighted	2.21982	7	0.946679
AL amyloidosis	prot-a-1466	Interleukin-11 || id:prot-a-1466	IL11	MR Egger	1.66261	6	0.947971
AL amyloidosis	prot-a-1466	Interleukin-11 || id:prot-a-1466	IL11	Inverse variance weighted	3.87095	7	0.794516
AL amyloidosis	prot-a-1465	Interleukin-10 receptor subunit beta || id:prot-a-1465	IL10RB	MR Egger	7.0378	6	0.317366
AL amyloidosis	prot-a-1465	Interleukin-10 receptor subunit beta || id:prot-a-1465	IL10RB	Inverse variance weighted	7.40847	7	0.387623
AL amyloidosis	prot-a-1464	Interleukin-10 || id:prot-a-1464	IL10	MR Egger	5.13415	6	0.526726
AL amyloidosis	prot-a-1464	Interleukin-10 || id:prot-a-1464	IL10	Inverse variance weighted	7.56377	7	0.372626
AL amyloidosis	prot-a-2965	Transforming growth factor beta-3 || id:prot-a-2965	TGFB3	MR Egger	3.55098	6	0.737175
AL amyloidosis	prot-a-2965	Transforming growth factor beta-3 || id:prot-a-2965	TGFB3	Inverse variance weighted	4.11246	7	0.766737
AL amyloidosis	prot-a-2964	Transforming growth factor beta-2 || id:prot-a-2964	TGFB2	MR Egger	5.67689	6	0.46034
AL amyloidosis	prot-a-2964	Transforming growth factor beta-2 || id:prot-a-2964	TGFB2	Inverse variance weighted	8.05761	7	0.327541
AL amyloidosis	prot-a-2962	Transforming growth factor beta-1 || id:prot-a-2962	TGFB1	MR Egger	2.68907	6	0.846737
AL amyloidosis	prot-a-2962	Transforming growth factor beta-1 || id:prot-a-2962	TGFB1	Inverse variance weighted	4.667	7	0.700525
AL amyloidosis	prot-a-2961	Transforming growth factor alpha || id:prot-a-2961	TGFA	MR Egger	6.98625	6	0.32212
AL amyloidosis	prot-a-2961	Transforming growth factor alpha || id:prot-a-2961	TGFA	Inverse variance weighted	7.16555	7	0.411849
AL amyloidosis	prot-a-411	C-C motif chemokine 8 || id:prot-a-411	CCL8	MR Egger	3.78118	6	0.70626
AL amyloidosis	prot-a-411	C-C motif chemokine 8 || id:prot-a-411	CCL8	Inverse variance weighted	3.9862	7	0.781365
AL amyloidosis	prot-a-410	C-C motif chemokine 7 || id:prot-a-410	CCL7	MR Egger	3.51022	6	0.742609
AL amyloidosis	prot-a-410	C-C motif chemokine 7 || id:prot-a-410	CCL7	Inverse variance weighted	3.51035	7	0.834128
AL amyloidosis	prot-a-409	C-C motif chemokine 5 || id:prot-a-409	CCL5	MR Egger	6.52718	6	0.366791
AL amyloidosis	prot-a-409	C-C motif chemokine 5 || id:prot-a-409	CCL5	Inverse variance weighted	6.54345	7	0.477909
AL amyloidosis	prot-a-398	C-C motif chemokine 22 || id:prot-a-398	CCL22	MR Egger	22.5627	6	0.000956964
AL amyloidosis	prot-a-398	C-C motif chemokine 22 || id:prot-a-398	CCL22	Inverse variance weighted	23.1168	7	0.00162659
AL amyloidosis	prot-a-396	C-C motif chemokine 20 || id:prot-a-396	CCL20	MR Egger	5.36341	6	0.498116
AL amyloidosis	prot-a-396	C-C motif chemokine 20 || id:prot-a-396	CCL20	Inverse variance weighted	10.7971	7	0.147717
AL amyloidosis	prot-a-407	C-C motif chemokine 3 || id:prot-a-407	CCL3	MR Egger	6.98659	6	0.322089
AL amyloidosis	prot-a-407	C-C motif chemokine 3 || id:prot-a-407	CCL3	Inverse variance weighted	7.16492	7	0.411913
AL amyloidosis	prot-a-394	C-C motif chemokine 17 || id:prot-a-394	CCL17	MR Egger	7.65607	6	0.264398
AL amyloidosis	prot-a-394	C-C motif chemokine 17 || id:prot-a-394	CCL17	Inverse variance weighted	7.66046	7	0.363484
AL amyloidosis	prot-a-389	C-C motif chemokine 13 || id:prot-a-389	CCL13	MR Egger	5.70324	6	0.457241
AL amyloidosis	prot-a-389	C-C motif chemokine 13 || id:prot-a-389	CCL13	Inverse variance weighted	9.0886	7	0.246357
AL amyloidosis	prot-a-388	C-C motif chemokine 1 || id:prot-a-388	CCL1	MR Egger	8.35139	6	0.213473
AL amyloidosis	prot-a-388	C-C motif chemokine 1 || id:prot-a-388	CCL1	Inverse variance weighted	10.1833	7	0.178422
AL amyloidosis	prot-a-745	C-X-C motif chemokine 16 || id:prot-a-745	CXCL16	MR Egger	7.33916	6	0.290617
AL amyloidosis	prot-a-745	C-X-C motif chemokine 16 || id:prot-a-745	CXCL16	Inverse variance weighted	7.77389	7	0.352954
AL amyloidosis	prot-a-750	C-X-C motif chemokine 9 || id:prot-a-750	CXCL9	MR Egger	6.86079	6	0.333913
AL amyloidosis	prot-a-750	C-X-C motif chemokine 9 || id:prot-a-750	CXCL9	Inverse variance weighted	9.1744	7	0.240376
AL amyloidosis	prot-a-744	C-X-C motif chemokine 14 || id:prot-a-744	CXCL14	MR Egger	3.44733	6	0.750964
AL amyloidosis	prot-a-744	C-X-C motif chemokine 14 || id:prot-a-744	CXCL14	Inverse variance weighted	5.37854	7	0.613872
AL amyloidosis	prot-a-743	C-X-C motif chemokine 13 || id:prot-a-743	CXCL13	MR Egger	15.3205	6	0.0179051
AL amyloidosis	prot-a-743	C-X-C motif chemokine 13 || id:prot-a-743	CXCL13	Inverse variance weighted	15.507	7	0.0300226
AL amyloidosis	prot-a-748	C-X-C motif chemokine 5 || id:prot-a-748	CXCL5	MR Egger	5.1177	6	0.528808
AL amyloidosis	prot-a-748	C-X-C motif chemokine 5 || id:prot-a-748	CXCL5	Inverse variance weighted	7.61835	7	0.367446
AL amyloidosis	prot-a-739	C-X-C motif chemokine 11 || id:prot-a-739	CXCL11	MR Egger	3.81609	6	0.701548
AL amyloidosis	prot-a-739	C-X-C motif chemokine 11 || id:prot-a-739	CXCL11	Inverse variance weighted	3.89717	7	0.791542
AL amyloidosis	prot-a-738	C-X-C motif chemokine 10 || id:prot-a-738	CXCL10	MR Egger	5.78501	6	0.4477
AL amyloidosis	prot-a-738	C-X-C motif chemokine 10 || id:prot-a-738	CXCL10	Inverse variance weighted	7.70227	7	0.359578
AL amyloidosis	prot-a-682	Granulocyte-macrophage colony-stimulating factor receptor subunit alpha || id:prot-a-682	CSF2RA	MR Egger	9.31664	6	0.156538
AL amyloidosis	prot-a-682	Granulocyte-macrophage colony-stimulating factor receptor subunit alpha || id:prot-a-682	CSF2RA	Inverse variance weighted	9.98474	7	0.18944
AL amyloidosis	prot-a-681	Granulocyte-macrophage colony-stimulating factor || id:prot-a-681	GM-CSF	MR Egger	3.75439	6	0.709873
AL amyloidosis	prot-a-681	Granulocyte-macrophage colony-stimulating factor || id:prot-a-681	GM-CSF	Inverse variance weighted	4.32606	7	0.741548
AL amyloidosis	prot-a-686	Granulocyte colony-stimulating factor receptor || id:prot-a-686	GCSFR	MR Egger	3.52087	6	0.741191
AL amyloidosis	prot-a-686	Granulocyte colony-stimulating factor receptor || id:prot-a-686	GCSFR	Inverse variance weighted	3.52115	7	0.83298
AL amyloidosis	prot-a-685	Granulocyte colony-stimulating factor || id:prot-a-685	GCSF	MR Egger	3.2323	6	0.779177
AL amyloidosis	prot-a-685	Granulocyte colony-stimulating factor || id:prot-a-685	GCSF	Inverse variance weighted	4.43069	7	0.729046
AL amyloidosis	prot-a-680	Macrophage colony-stimulating factor 1 || id:prot-a-680	MCSF	MR Egger	11.87	6	0.0649316
AL amyloidosis	prot-a-680	Macrophage colony-stimulating factor 1 || id:prot-a-680	MCSF	Inverse variance weighted	12.2346	7	0.0931028
AL amyloidosis	prot-a-680	Macrophage colony-stimulating factor 1 || id:prot-a-680	MCSF	MR Egger	11.87	6	0.0649316
AL amyloidosis	prot-a-680	Macrophage colony-stimulating factor 1 || id:prot-a-680	MCSF	Inverse variance weighted	12.2346	7	0.0931028

## Sheet: infla_pleiotropy
id.exposure	id.outcome	outcome	exposure	egger_intercept	se	pval
prot-a-2982	ebi-a-GCST004133	Ulcerative colitis || id:ebi-a-GCST004133	TIRAP	0.0109901	0.010357	0.311372
prot-a-1547	ebi-a-GCST004133	Ulcerative colitis || id:ebi-a-GCST004133	ILF3	0.0413623	0.0631963	0.559488
prot-a-749	ebi-a-GCST004133	Ulcerative colitis || id:ebi-a-GCST004133	IL8	-0.0197941	0.0230802	0.406636
prot-a-1545	ebi-a-GCST004133	Ulcerative colitis || id:ebi-a-GCST004133	IL9	0.00325409	0.0193817	0.870832
prot-a-1544	ebi-a-GCST004133	Ulcerative colitis || id:ebi-a-GCST004133	IL7RA	-0.00426738	0.0208682	0.842071
prot-a-1543	ebi-a-GCST004133	Ulcerative colitis || id:ebi-a-GCST004133	IL7	0.0269349	0.0181658	0.163926
prot-a-1542	ebi-a-GCST004133	Ulcerative colitis || id:ebi-a-GCST004133	IL6RB	0.00370463	0.0169978	0.832927
prot-a-1540	ebi-a-GCST004133	Ulcerative colitis || id:ebi-a-GCST004133	IL6RA	-0.0650411	0.0258946	0.0402932
prot-a-1538	ebi-a-GCST004133	Ulcerative colitis || id:ebi-a-GCST004133	IL6	-0.00717281	0.0258888	0.787375
prot-a-1536	ebi-a-GCST004133	Ulcerative colitis || id:ebi-a-GCST004133	IL5RA	-0.0498951	0.0201153	0.0380848
prot-a-1534	ebi-a-GCST004133	Ulcerative colitis || id:ebi-a-GCST004133	IL5	-0.039297	0.035232	0.30151
prot-a-1533	ebi-a-GCST004133	Ulcerative colitis || id:ebi-a-GCST004133	IL4RA	0.003185	0.0291539	0.915403
prot-a-1532	ebi-a-GCST004133	Ulcerative colitis || id:ebi-a-GCST004133	IL4	0.000441612	0.0183936	0.98121
prot-a-1530	ebi-a-GCST004133	Ulcerative colitis || id:ebi-a-GCST004133	IL3RA	0.0144901	0.0236842	0.555805
prot-a-1529	ebi-a-GCST004133	Ulcerative colitis || id:ebi-a-GCST004133	IL37	0.0103435	0.0216773	0.643507
prot-a-1528	ebi-a-GCST004133	Ulcerative colitis || id:ebi-a-GCST004133	IL36 gamma	0.0236511	0.0365974	0.54203
prot-a-1527	ebi-a-GCST004133	Ulcerative colitis || id:ebi-a-GCST004133	IL36 beta	-0.0170747	0.0156736	0.297375
prot-a-1526	ebi-a-GCST004133	Ulcerative colitis || id:ebi-a-GCST004133	IL36 alpha	-0.0305124	0.0210679	0.190803
prot-a-1525	ebi-a-GCST004133	Ulcerative colitis || id:ebi-a-GCST004133	IL3	-0.00124032	0.0177641	0.946288
prot-a-1524	ebi-a-GCST004133	Ulcerative colitis || id:ebi-a-GCST004133	IL34	-0.0175079	0.0157205	0.289152
prot-a-1523	ebi-a-GCST004133	Ulcerative colitis || id:ebi-a-GCST004133	IL32	0.00694724	0.0190474	0.722906
prot-a-1521	ebi-a-GCST004133	Ulcerative colitis || id:ebi-a-GCST004133	IL31	-0.00012032	0.0215628	0.99567
prot-a-1519	ebi-a-GCST004133	Ulcerative colitis || id:ebi-a-GCST004133	IL2RB	0.0259197	0.0274617	0.367493
prot-a-1518	ebi-a-GCST004133	Ulcerative colitis || id:ebi-a-GCST004133	IL2RA	0.0157877	0.0498377	0.764209
prot-a-1517	ebi-a-GCST004133	Ulcerative colitis || id:ebi-a-GCST004133	IL27RA	-0.00995163	0.0132057	0.472692
prot-a-1516	ebi-a-GCST004133	Ulcerative colitis || id:ebi-a-GCST004133	IL27	-0.0296145	0.0279196	0.305604
prot-a-1515	ebi-a-GCST004133	Ulcerative colitis || id:ebi-a-GCST004133	IL25	-0.0219116	0.0115241	0.0796472
prot-a-1514	ebi-a-GCST004133	Ulcerative colitis || id:ebi-a-GCST004133	IL24	-0.0160861	0.0231261	0.498936
prot-a-1512	ebi-a-GCST004133	Ulcerative colitis || id:ebi-a-GCST004133	IL2	0.0189043	0.0185046	0.325605
prot-a-1507	ebi-a-GCST004133	Ulcerative colitis || id:ebi-a-GCST004133	IL22	0.0236474	0.0174518	0.202588
prot-a-1506	ebi-a-GCST004133	Ulcerative colitis || id:ebi-a-GCST004133	IL21	-0.0234575	0.0272444	0.407612
prot-a-1505	ebi-a-GCST004133	Ulcerative colitis || id:ebi-a-GCST004133	IL20	-0.00366847	0.0254052	0.894341
prot-a-1504	ebi-a-GCST004133	Ulcerative colitis || id:ebi-a-GCST004133	IL1RN	0.00518252	0.0312838	0.872085
prot-a-1503	ebi-a-GCST004133	Ulcerative colitis || id:ebi-a-GCST004133	IL1RL2	0.0283435	0.0294814	0.368375
prot-a-1502	ebi-a-GCST004133	Ulcerative colitis || id:ebi-a-GCST004133	IL1RL1	-0.0257118	0.00884183	0.0122195
prot-a-1501	ebi-a-GCST004133	Ulcerative colitis || id:ebi-a-GCST004133	IL1RAPL2	0.000370237	0.0181145	0.984095
prot-a-1499	ebi-a-GCST004133	Ulcerative colitis || id:ebi-a-GCST004133	IL1RAP	0.000423796	0.00836679	0.960436
prot-a-1497	ebi-a-GCST004133	Ulcerative colitis || id:ebi-a-GCST004133	IL1R2	-0.0214853	0.0219168	0.348
prot-a-1496	ebi-a-GCST004133	Ulcerative colitis || id:ebi-a-GCST004133	IL1R1	0.0174525	0.0138322	0.227664
prot-a-1495	ebi-a-GCST004133	Ulcerative colitis || id:ebi-a-GCST004133	IL1B	0.0130969	0.03506	0.719791
prot-a-1494	ebi-a-GCST004133	Ulcerative colitis || id:ebi-a-GCST004133	IL1A	0.00691493	0.0165592	0.683062
prot-a-1493	ebi-a-GCST004133	Ulcerative colitis || id:ebi-a-GCST004133	IL19	0.00695505	0.0126375	0.594159
prot-a-1491	ebi-a-GCST004133	Ulcerative colitis || id:ebi-a-GCST004133	IL18R1	-0.00425589	0.0101227	0.682267
prot-a-1490	ebi-a-GCST004133	Ulcerative colitis || id:ebi-a-GCST004133	IL18BP	-0.0355509	0.0251331	0.190865
prot-a-1479	ebi-a-GCST004133	Ulcerative colitis || id:ebi-a-GCST004133	IL16	0.0056626	0.0145819	0.703612
prot-a-1475	ebi-a-GCST004133	Ulcerative colitis || id:ebi-a-GCST004133	IL13	0.0154964	0.0163115	0.362502
prot-a-1471	ebi-a-GCST004133	Ulcerative colitis || id:ebi-a-GCST004133	IL23	-0.0455176	0.0426103	0.306435
prot-a-1468	ebi-a-GCST004133	Ulcerative colitis || id:ebi-a-GCST004133	IL12	0.0212309	0.0252349	0.418077
prot-a-1467	ebi-a-GCST004133	Ulcerative colitis || id:ebi-a-GCST004133	IL11RA	0.0180764	0.0172016	0.328243
prot-a-1466	ebi-a-GCST004133	Ulcerative colitis || id:ebi-a-GCST004133	IL11	0.0201646	0.0215649	0.371784
prot-a-1465	ebi-a-GCST004133	Ulcerative colitis || id:ebi-a-GCST004133	IL10RB	-0.0130141	0.0225024	0.577217
prot-a-1464	ebi-a-GCST004133	Ulcerative colitis || id:ebi-a-GCST004133	IL10	-0.0224868	0.0200791	0.313645
prot-a-2965	ebi-a-GCST004133	Ulcerative colitis || id:ebi-a-GCST004133	TGFB3	0.001011	0.0163494	0.952044
prot-a-2964	ebi-a-GCST004133	Ulcerative colitis || id:ebi-a-GCST004133	TGFB2	0.00597727	0.0250559	0.816266
prot-a-2962	ebi-a-GCST004133	Ulcerative colitis || id:ebi-a-GCST004133	TGFB1	-0.0712093	0.0276233	0.0495597
prot-a-2961	ebi-a-GCST004133	Ulcerative colitis || id:ebi-a-GCST004133	TGFA	-0.037132	0.0598017	0.568285
prot-a-411	ebi-a-GCST004133	Ulcerative colitis || id:ebi-a-GCST004133	CCL8	0.00156321	0.0320014	0.962002
prot-a-410	ebi-a-GCST004133	Ulcerative colitis || id:ebi-a-GCST004133	CCL7	0.00181966	0.0111255	0.872262
prot-a-409	ebi-a-GCST004133	Ulcerative colitis || id:ebi-a-GCST004133	CCL5	-0.0262019	0.0247359	0.310336
prot-a-398	ebi-a-GCST004133	Ulcerative colitis || id:ebi-a-GCST004133	CCL22	0.0139015	0.0157398	0.39786
prot-a-396	ebi-a-GCST004133	Ulcerative colitis || id:ebi-a-GCST004133	CCL20	-0.00986646	0.0411132	0.818332
prot-a-407	ebi-a-GCST004133	Ulcerative colitis || id:ebi-a-GCST004133	CCL3	-0.0163606	0.0189202	0.409651
prot-a-394	ebi-a-GCST004133	Ulcerative colitis || id:ebi-a-GCST004133	CCL17	0.0293648	0.0192434	0.152933
prot-a-389	ebi-a-GCST004133	Ulcerative colitis || id:ebi-a-GCST004133	CCL13	0.0241777	0.019988	0.247966
prot-a-388	ebi-a-GCST004133	Ulcerative colitis || id:ebi-a-GCST004133	CCL1	0.000403527	0.0177898	0.982276
prot-a-745	ebi-a-GCST004133	Ulcerative colitis || id:ebi-a-GCST004133	CXCL16	-0.0339346	0.0196906	0.101953
prot-a-750	ebi-a-GCST004133	Ulcerative colitis || id:ebi-a-GCST004133	CXCL9	-0.0259399	0.0249276	0.325204
prot-a-744	ebi-a-GCST004133	Ulcerative colitis || id:ebi-a-GCST004133	CXCL14	-0.00909028	0.0214582	0.68455
prot-a-743	ebi-a-GCST004133	Ulcerative colitis || id:ebi-a-GCST004133	CXCL13	0.0465217	0.0271126	0.111866
prot-a-748	ebi-a-GCST004133	Ulcerative colitis || id:ebi-a-GCST004133	CXCL5	0.00766119	0.0388936	0.848757
prot-a-739	ebi-a-GCST004133	Ulcerative colitis || id:ebi-a-GCST004133	CXCL11	0.0525137	0.0249822	0.0649027
prot-a-738	ebi-a-GCST004133	Ulcerative colitis || id:ebi-a-GCST004133	CXCL10	-0.00906277	0.0325321	0.794376
prot-a-682	ebi-a-GCST004133	Ulcerative colitis || id:ebi-a-GCST004133	CSF2RA	-0.055901	0.0187225	0.0153057
prot-a-681	ebi-a-GCST004133	Ulcerative colitis || id:ebi-a-GCST004133	GM-CSF	-0.0209848	0.0224894	0.386779
prot-a-686	ebi-a-GCST004133	Ulcerative colitis || id:ebi-a-GCST004133	GCSFR	-0.00402939	0.0399865	0.92365
prot-a-685	ebi-a-GCST004133	Ulcerative colitis || id:ebi-a-GCST004133	GCSF	0.0145301	0.0508506	0.789263
prot-a-680	ebi-a-GCST004133	Ulcerative colitis || id:ebi-a-GCST004133	MCSF	0.00934603	0.0245149	0.716161
prot-a-2982	ebi-a-GCST004131	Inflammatory bowel disease || id:ebi-a-GCST004131	TIRAP	0.00709142	0.0100794	0.49633
prot-a-1547	ebi-a-GCST004131	Inflammatory bowel disease || id:ebi-a-GCST004131	ILF3	0.0324362	0.049665	0.56028
prot-a-749	ebi-a-GCST004131	Inflammatory bowel disease || id:ebi-a-GCST004131	IL8	-0.0119561	0.0178728	0.515229
prot-a-1545	ebi-a-GCST004131	Inflammatory bowel disease || id:ebi-a-GCST004131	IL9	-0.00184357	0.0161168	0.911749
prot-a-1544	ebi-a-GCST004131	Inflammatory bowel disease || id:ebi-a-GCST004131	IL7RA	0.00149028	0.0210768	0.945025
prot-a-1543	ebi-a-GCST004131	Inflammatory bowel disease || id:ebi-a-GCST004131	IL7	0.0203429	0.0142603	0.179207
prot-a-1542	ebi-a-GCST004131	Inflammatory bowel disease || id:ebi-a-GCST004131	IL6RB	0.0209093	0.0139261	0.171638
prot-a-1540	ebi-a-GCST004131	Inflammatory bowel disease || id:ebi-a-GCST004131	IL6RA	-0.0752302	0.0211628	0.00928356
prot-a-1538	ebi-a-GCST004131	Inflammatory bowel disease || id:ebi-a-GCST004131	IL6	-0.0123053	0.0171189	0.488709
prot-a-1536	ebi-a-GCST004131	Inflammatory bowel disease || id:ebi-a-GCST004131	IL5RA	-0.0106264	0.0219198	0.640825
prot-a-1534	ebi-a-GCST004131	Inflammatory bowel disease || id:ebi-a-GCST004131	IL5	-0.0149497	0.030273	0.636543
prot-a-1533	ebi-a-GCST004131	Inflammatory bowel disease || id:ebi-a-GCST004131	IL4RA	0.00845572	0.0231023	0.722812
prot-a-1532	ebi-a-GCST004131	Inflammatory bowel disease || id:ebi-a-GCST004131	IL4	-0.000743384	0.0175069	0.966775
prot-a-1530	ebi-a-GCST004131	Inflammatory bowel disease || id:ebi-a-GCST004131	IL3RA	-0.0102662	0.0126372	0.437534
prot-a-1529	ebi-a-GCST004131	Inflammatory bowel disease || id:ebi-a-GCST004131	IL37	0.00798834	0.0182117	0.670249
prot-a-1528	ebi-a-GCST004131	Inflammatory bowel disease || id:ebi-a-GCST004131	IL36 gamma	0.0210232	0.0258376	0.446916
prot-a-1527	ebi-a-GCST004131	Inflammatory bowel disease || id:ebi-a-GCST004131	IL36 beta	-0.00562794	0.0123261	0.656123
prot-a-1526	ebi-a-GCST004131	Inflammatory bowel disease || id:ebi-a-GCST004131	IL36 alpha	-0.0160796	0.0198552	0.44145
prot-a-1525	ebi-a-GCST004131	Inflammatory bowel disease || id:ebi-a-GCST004131	IL3	-0.0104728	0.0195535	0.608826
prot-a-1524	ebi-a-GCST004131	Inflammatory bowel disease || id:ebi-a-GCST004131	IL34	-0.0231868	0.0132814	0.108673
prot-a-1523	ebi-a-GCST004131	Inflammatory bowel disease || id:ebi-a-GCST004131	IL32	0.00327155	0.0156587	0.838698
prot-a-1521	ebi-a-GCST004131	Inflammatory bowel disease || id:ebi-a-GCST004131	IL31	0.00246017	0.0167073	0.88618
prot-a-1519	ebi-a-GCST004131	Inflammatory bowel disease || id:ebi-a-GCST004131	IL2RB	0.0231469	0.0245509	0.367997
prot-a-1518	ebi-a-GCST004131	Inflammatory bowel disease || id:ebi-a-GCST004131	IL2RA	-0.00882195	0.03964	0.83269
prot-a-1517	ebi-a-GCST004131	Inflammatory bowel disease || id:ebi-a-GCST004131	IL27RA	-0.00370291	0.00978879	0.715063
prot-a-1516	ebi-a-GCST004131	Inflammatory bowel disease || id:ebi-a-GCST004131	IL27	-0.0204845	0.0298709	0.503321
prot-a-1515	ebi-a-GCST004131	Inflammatory bowel disease || id:ebi-a-GCST004131	IL25	-0.01363	0.0090373	0.155419
prot-a-1514	ebi-a-GCST004131	Inflammatory bowel disease || id:ebi-a-GCST004131	IL24	-0.0136799	0.0203294	0.512787
prot-a-1512	ebi-a-GCST004131	Inflammatory bowel disease || id:ebi-a-GCST004131	IL2	0.010601	0.0168257	0.539582
prot-a-1507	ebi-a-GCST004131	Inflammatory bowel disease || id:ebi-a-GCST004131	IL22	0.0155944	0.0135859	0.275386
prot-a-1506	ebi-a-GCST004131	Inflammatory bowel disease || id:ebi-a-GCST004131	IL21	-0.0254033	0.0241536	0.315476
prot-a-1505	ebi-a-GCST004131	Inflammatory bowel disease || id:ebi-a-GCST004131	IL20	-0.010955	0.0199526	0.621197
prot-a-1504	ebi-a-GCST004131	Inflammatory bowel disease || id:ebi-a-GCST004131	IL1RN	-0.00344676	0.0236853	0.887505
prot-a-1503	ebi-a-GCST004131	Inflammatory bowel disease || id:ebi-a-GCST004131	IL1RL2	0.0356342	0.0222919	0.153959
prot-a-1502	ebi-a-GCST004131	Inflammatory bowel disease || id:ebi-a-GCST004131	IL1RL1	-0.023173	0.00790046	0.0116433
prot-a-1501	ebi-a-GCST004131	Inflammatory bowel disease || id:ebi-a-GCST004131	IL1RAPL2	0.00794671	0.0151585	0.611533
prot-a-1499	ebi-a-GCST004131	Inflammatory bowel disease || id:ebi-a-GCST004131	IL1RAP	-0.00619774	0.0077364	0.438641
prot-a-1497	ebi-a-GCST004131	Inflammatory bowel disease || id:ebi-a-GCST004131	IL1R2	-0.017967	0.0163322	0.294784
prot-a-1496	ebi-a-GCST004131	Inflammatory bowel disease || id:ebi-a-GCST004131	IL1R1	0.0136971	0.0152404	0.38399
prot-a-1495	ebi-a-GCST004131	Inflammatory bowel disease || id:ebi-a-GCST004131	IL1B	0.016694	0.025767	0.537724
prot-a-1494	ebi-a-GCST004131	Inflammatory bowel disease || id:ebi-a-GCST004131	IL1A	0.00197124	0.0136449	0.887191
prot-a-1493	ebi-a-GCST004131	Inflammatory bowel disease || id:ebi-a-GCST004131	IL19	0.008613	0.0109643	0.450343
prot-a-1491	ebi-a-GCST004131	Inflammatory bowel disease || id:ebi-a-GCST004131	IL18R1	-0.0102228	0.00896171	0.278215
prot-a-1490	ebi-a-GCST004131	Inflammatory bowel disease || id:ebi-a-GCST004131	IL18BP	-0.0293393	0.0199943	0.176327
prot-a-1479	ebi-a-GCST004131	Inflammatory bowel disease || id:ebi-a-GCST004131	IL16	0.00590488	0.0108749	0.595682
prot-a-1475	ebi-a-GCST004131	Inflammatory bowel disease || id:ebi-a-GCST004131	IL13	0.00096771	0.0129549	0.941796
prot-a-1471	ebi-a-GCST004131	Inflammatory bowel disease || id:ebi-a-GCST004131	IL23	-0.0554458	0.041518	0.206503
prot-a-1468	ebi-a-GCST004131	Inflammatory bowel disease || id:ebi-a-GCST004131	IL12	0.00725758	0.0200594	0.724353
prot-a-1467	ebi-a-GCST004131	Inflammatory bowel disease || id:ebi-a-GCST004131	IL11RA	0.016122	0.013566	0.273422
prot-a-1466	ebi-a-GCST004131	Inflammatory bowel disease || id:ebi-a-GCST004131	IL11	0.0131636	0.0213819	0.551884
prot-a-1465	ebi-a-GCST004131	Inflammatory bowel disease || id:ebi-a-GCST004131	IL10RB	-0.00120587	0.0176167	0.946924
prot-a-1464	ebi-a-GCST004131	Inflammatory bowel disease || id:ebi-a-GCST004131	IL10	-0.0279956	0.0186781	0.194191
prot-a-2965	ebi-a-GCST004131	Inflammatory bowel disease || id:ebi-a-GCST004131	TGFB3	-0.003323	0.0136931	0.813696
prot-a-2964	ebi-a-GCST004131	Inflammatory bowel disease || id:ebi-a-GCST004131	TGFB2	-0.015328	0.0197355	0.455332
prot-a-2962	ebi-a-GCST004131	Inflammatory bowel disease || id:ebi-a-GCST004131	TGFB1	-0.0546721	0.021763	0.0536864
prot-a-2961	ebi-a-GCST004131	Inflammatory bowel disease || id:ebi-a-GCST004131	TGFA	0.021738	0.047306	0.669726
prot-a-411	ebi-a-GCST004131	Inflammatory bowel disease || id:ebi-a-GCST004131	CCL8	-0.00357049	0.026834	0.896786
prot-a-410	ebi-a-GCST004131	Inflammatory bowel disease || id:ebi-a-GCST004131	CCL7	-0.0070154	0.00840077	0.41677
prot-a-409	ebi-a-GCST004131	Inflammatory bowel disease || id:ebi-a-GCST004131	CCL5	-0.0160928	0.0218081	0.474741
prot-a-398	ebi-a-GCST004131	Inflammatory bowel disease || id:ebi-a-GCST004131	CCL22	0.010014	0.0124366	0.439426
prot-a-396	ebi-a-GCST004131	Inflammatory bowel disease || id:ebi-a-GCST004131	CCL20	-0.0140862	0.0238013	0.575573
prot-a-407	ebi-a-GCST004131	Inflammatory bowel disease || id:ebi-a-GCST004131	CCL3	-0.0156828	0.0150248	0.323805
prot-a-394	ebi-a-GCST004131	Inflammatory bowel disease || id:ebi-a-GCST004131	CCL17	0.0218874	0.0192725	0.278265
prot-a-389	ebi-a-GCST004131	Inflammatory bowel disease || id:ebi-a-GCST004131	CCL13	0.0123073	0.0136097	0.382286
prot-a-388	ebi-a-GCST004131	Inflammatory bowel disease || id:ebi-a-GCST004131	CCL1	-0.0199872	0.0169147	0.260232
prot-a-745	ebi-a-GCST004131	Inflammatory bowel disease || id:ebi-a-GCST004131	CXCL16	-0.0254208	0.0185901	0.188321
prot-a-750	ebi-a-GCST004131	Inflammatory bowel disease || id:ebi-a-GCST004131	CXCL9	-0.0191434	0.0196809	0.356123
prot-a-744	ebi-a-GCST004131	Inflammatory bowel disease || id:ebi-a-GCST004131	CXCL14	-0.0169213	0.0168918	0.349831
prot-a-743	ebi-a-GCST004131	Inflammatory bowel disease || id:ebi-a-GCST004131	CXCL13	0.04582	0.0262613	0.106556
prot-a-748	ebi-a-GCST004131	Inflammatory bowel disease || id:ebi-a-GCST004131	CXCL5	-0.00139602	0.0254268	0.957415
prot-a-739	ebi-a-GCST004131	Inflammatory bowel disease || id:ebi-a-GCST004131	CXCL11	0.0522744	0.0280605	0.0953693
prot-a-738	ebi-a-GCST004131	Inflammatory bowel disease || id:ebi-a-GCST004131	CXCL10	-0.00229439	0.0239933	0.928417
prot-a-682	ebi-a-GCST004131	Inflammatory bowel disease || id:ebi-a-GCST004131	CSF2RA	-0.0370217	0.0146162	0.0320815
prot-a-681	ebi-a-GCST004131	Inflammatory bowel disease || id:ebi-a-GCST004131	GM-CSF	-0.00842061	0.017704	0.651158
prot-a-686	ebi-a-GCST004131	Inflammatory bowel disease || id:ebi-a-GCST004131	GCSFR	0.0141083	0.0370046	0.718674
prot-a-685	ebi-a-GCST004131	Inflammatory bowel disease || id:ebi-a-GCST004131	GCSF	-0.0036351	0.0390373	0.930287
prot-a-680	ebi-a-GCST004131	Inflammatory bowel disease || id:ebi-a-GCST004131	MCSF	-0.00829336	0.0192744	0.682018
prot-a-2982	finn-b-K11_COELIAC	Coeliac disease || id:finn-b-K11_COELIAC	TIRAP	0.0225937	0.0216728	0.317731
prot-a-1547	finn-b-K11_COELIAC	Coeliac disease || id:finn-b-K11_COELIAC	ILF3	-0.0418413	0.0855818	0.645598
prot-a-749	finn-b-K11_COELIAC	Coeliac disease || id:finn-b-K11_COELIAC	IL8	-0.0409663	0.0499651	0.427052
prot-a-1545	finn-b-K11_COELIAC	Coeliac disease || id:finn-b-K11_COELIAC	IL9	-0.0082458	0.0501442	0.873017
prot-a-1544	finn-b-K11_COELIAC	Coeliac disease || id:finn-b-K11_COELIAC	IL7RA	0.00108419	0.0368883	0.977079
prot-a-1543	finn-b-K11_COELIAC	Coeliac disease || id:finn-b-K11_COELIAC	IL7	0.0196953	0.0286713	0.501962
prot-a-1542	finn-b-K11_COELIAC	Coeliac disease || id:finn-b-K11_COELIAC	IL6RB	-0.0304318	0.0368395	0.424886
prot-a-1540	finn-b-K11_COELIAC	Coeliac disease || id:finn-b-K11_COELIAC	IL6RA	0.0285815	0.0319063	0.400117
prot-a-1538	finn-b-K11_COELIAC	Coeliac disease || id:finn-b-K11_COELIAC	IL6	-0.0366513	0.0293182	0.237197
prot-a-1536	finn-b-K11_COELIAC	Coeliac disease || id:finn-b-K11_COELIAC	IL5RA	-0.305487	0.331571	0.387528
prot-a-1534	finn-b-K11_COELIAC	Coeliac disease || id:finn-b-K11_COELIAC	IL5	-0.0270371	0.0547849	0.634912
prot-a-1533	finn-b-K11_COELIAC	Coeliac disease || id:finn-b-K11_COELIAC	IL4RA	-0.0170169	0.054081	0.761072
prot-a-1532	finn-b-K11_COELIAC	Coeliac disease || id:finn-b-K11_COELIAC	IL4	0.0394218	0.0421545	0.364511
prot-a-1530	finn-b-K11_COELIAC	Coeliac disease || id:finn-b-K11_COELIAC	IL3RA	0.0965809	0.057631	0.117638
prot-a-1529	finn-b-K11_COELIAC	Coeliac disease || id:finn-b-K11_COELIAC	IL37	0.0138478	0.0328839	0.681784
prot-a-1528	finn-b-K11_COELIAC	Coeliac disease || id:finn-b-K11_COELIAC	IL36 gamma	-0.0094956	0.0571039	0.872057
prot-a-1527	finn-b-K11_COELIAC	Coeliac disease || id:finn-b-K11_COELIAC	IL36 beta	-0.024964	0.0308184	0.432499
prot-a-1526	finn-b-K11_COELIAC	Coeliac disease || id:finn-b-K11_COELIAC	IL36 alpha	0.178984	0.128157	0.192756
prot-a-1525	finn-b-K11_COELIAC	Coeliac disease || id:finn-b-K11_COELIAC	IL3	0.116325	0.0452228	0.0368859
prot-a-1524	finn-b-K11_COELIAC	Coeliac disease || id:finn-b-K11_COELIAC	IL34	-0.00690229	0.0233412	0.771031
prot-a-1523	finn-b-K11_COELIAC	Coeliac disease || id:finn-b-K11_COELIAC	IL32	-0.0208761	0.0410454	0.620247
prot-a-1521	finn-b-K11_COELIAC	Coeliac disease || id:finn-b-K11_COELIAC	IL31	-0.0444055	0.0433087	0.329373
prot-a-1519	finn-b-K11_COELIAC	Coeliac disease || id:finn-b-K11_COELIAC	IL2RB	0.0188195	0.0769318	0.811249
prot-a-1518	finn-b-K11_COELIAC	Coeliac disease || id:finn-b-K11_COELIAC	IL2RA	0.0125828	0.047654	0.80058
prot-a-1517	finn-b-K11_COELIAC	Coeliac disease || id:finn-b-K11_COELIAC	IL27RA	-0.0490254	0.0239377	0.0677299
prot-a-1516	finn-b-K11_COELIAC	Coeliac disease || id:finn-b-K11_COELIAC	IL27	0.0532329	0.0427416	0.229856
prot-a-1515	finn-b-K11_COELIAC	Coeliac disease || id:finn-b-K11_COELIAC	IL25	0.00606008	0.0283995	0.834335
prot-a-1514	finn-b-K11_COELIAC	Coeliac disease || id:finn-b-K11_COELIAC	IL24	0.0411943	0.0533174	0.452592
prot-a-1512	finn-b-K11_COELIAC	Coeliac disease || id:finn-b-K11_COELIAC	IL2	0.0114088	0.0316595	0.723017
prot-a-1507	finn-b-K11_COELIAC	Coeliac disease || id:finn-b-K11_COELIAC	IL22	0.00446124	0.0309915	0.887591
prot-a-1506	finn-b-K11_COELIAC	Coeliac disease || id:finn-b-K11_COELIAC	IL21	0.317412	0.18945	0.116029
prot-a-1505	finn-b-K11_COELIAC	Coeliac disease || id:finn-b-K11_COELIAC	IL20	-0.033407	0.0815674	0.709615
prot-a-1504	finn-b-K11_COELIAC	Coeliac disease || id:finn-b-K11_COELIAC	IL1RN	0.00770814	0.0329902	0.818896
prot-a-1503	finn-b-K11_COELIAC	Coeliac disease || id:finn-b-K11_COELIAC	IL1RL2	0.0332998	0.0390468	0.415878
prot-a-1502	finn-b-K11_COELIAC	Coeliac disease || id:finn-b-K11_COELIAC	IL1RL1	-0.0139713	0.0206815	0.510335
prot-a-1501	finn-b-K11_COELIAC	Coeliac disease || id:finn-b-K11_COELIAC	IL1RAPL2	-0.0122362	0.0382751	0.755193
prot-a-1499	finn-b-K11_COELIAC	Coeliac disease || id:finn-b-K11_COELIAC	IL1RAP	-0.0335924	0.0216261	0.148627
prot-a-1497	finn-b-K11_COELIAC	Coeliac disease || id:finn-b-K11_COELIAC	IL1R2	0.0158394	0.0283943	0.589225
prot-a-1496	finn-b-K11_COELIAC	Coeliac disease || id:finn-b-K11_COELIAC	IL1R1	-0.00167652	0.0253718	0.948087
prot-a-1495	finn-b-K11_COELIAC	Coeliac disease || id:finn-b-K11_COELIAC	IL1B	-0.0210093	0.0339916	0.54911
prot-a-1494	finn-b-K11_COELIAC	Coeliac disease || id:finn-b-K11_COELIAC	IL1A	0.0224999	0.0325148	0.501116
prot-a-1493	finn-b-K11_COELIAC	Coeliac disease || id:finn-b-K11_COELIAC	IL19	-0.0313194	0.025399	0.239372
prot-a-1491	finn-b-K11_COELIAC	Coeliac disease || id:finn-b-K11_COELIAC	IL18R1	0.0123669	0.0202578	0.552934
prot-a-1490	finn-b-K11_COELIAC	Coeliac disease || id:finn-b-K11_COELIAC	IL18BP	0.0327584	0.0463743	0.496074
prot-a-1479	finn-b-K11_COELIAC	Coeliac disease || id:finn-b-K11_COELIAC	IL16	-0.0156448	0.0338112	0.649439
prot-a-1475	finn-b-K11_COELIAC	Coeliac disease || id:finn-b-K11_COELIAC	IL13	-0.00965134	0.0522049	0.856692
prot-a-1471	finn-b-K11_COELIAC	Coeliac disease || id:finn-b-K11_COELIAC	IL23	-0.0284602	0.0650039	0.668194
prot-a-1468	finn-b-K11_COELIAC	Coeliac disease || id:finn-b-K11_COELIAC	IL12	-0.0474829	0.0320282	0.158903
prot-a-1467	finn-b-K11_COELIAC	Coeliac disease || id:finn-b-K11_COELIAC	IL11RA	-0.061285	0.0369454	0.135741
prot-a-1466	finn-b-K11_COELIAC	Coeliac disease || id:finn-b-K11_COELIAC	IL11	0.0175418	0.0427009	0.689104
prot-a-1465	finn-b-K11_COELIAC	Coeliac disease || id:finn-b-K11_COELIAC	IL10RB	0.0610734	0.03423	0.0996742
prot-a-1464	finn-b-K11_COELIAC	Coeliac disease || id:finn-b-K11_COELIAC	IL10	0.0596971	0.0389166	0.175932
prot-a-2965	finn-b-K11_COELIAC	Coeliac disease || id:finn-b-K11_COELIAC	TGFB3	-0.0306916	0.0333055	0.376548
prot-a-2964	finn-b-K11_COELIAC	Coeliac disease || id:finn-b-K11_COELIAC	TGFB2	-0.00803307	0.0324795	0.808836
prot-a-2962	finn-b-K11_COELIAC	Coeliac disease || id:finn-b-K11_COELIAC	TGFB1	-0.0820183	0.0469526	0.118804
prot-a-2961	finn-b-K11_COELIAC	Coeliac disease || id:finn-b-K11_COELIAC	TGFA	0.070187	0.111992	0.55073
prot-a-411	finn-b-K11_COELIAC	Coeliac disease || id:finn-b-K11_COELIAC	CCL8	-0.0173842	0.0472762	0.719002
prot-a-410	finn-b-K11_COELIAC	Coeliac disease || id:finn-b-K11_COELIAC	CCL7	0.0026008	0.0229338	0.911213
prot-a-409	finn-b-K11_COELIAC	Coeliac disease || id:finn-b-K11_COELIAC	CCL5	0.0267911	0.0342631	0.447284
prot-a-398	finn-b-K11_COELIAC	Coeliac disease || id:finn-b-K11_COELIAC	CCL22	-0.0217961	0.0324754	0.513041
prot-a-396	finn-b-K11_COELIAC	Coeliac disease || id:finn-b-K11_COELIAC	CCL20	0.0143965	0.0863879	0.872358
prot-a-407	finn-b-K11_COELIAC	Coeliac disease || id:finn-b-K11_COELIAC	CCL3	-0.00290342	0.0223147	0.898826
prot-a-394	finn-b-K11_COELIAC	Coeliac disease || id:finn-b-K11_COELIAC	CCL17	-0.010023	0.027647	0.72201
prot-a-389	finn-b-K11_COELIAC	Coeliac disease || id:finn-b-K11_COELIAC	CCL13	-0.00670732	0.0294263	0.822415
prot-a-388	finn-b-K11_COELIAC	Coeliac disease || id:finn-b-K11_COELIAC	CCL1	-0.0189242	0.0334398	0.582809
prot-a-745	finn-b-K11_COELIAC	Coeliac disease || id:finn-b-K11_COELIAC	CXCL16	-0.0220203	0.0901455	0.809388
prot-a-750	finn-b-K11_COELIAC	Coeliac disease || id:finn-b-K11_COELIAC	CXCL9	-0.0988081	0.0661423	0.173563
prot-a-744	finn-b-K11_COELIAC	Coeliac disease || id:finn-b-K11_COELIAC	CXCL14	-0.0605209	0.0376634	0.14254
prot-a-743	finn-b-K11_COELIAC	Coeliac disease || id:finn-b-K11_COELIAC	CXCL13	-0.0239562	0.0372794	0.530858
prot-a-748	finn-b-K11_COELIAC	Coeliac disease || id:finn-b-K11_COELIAC	CXCL5	0.00103412	0.035518	0.977345
prot-a-739	finn-b-K11_COELIAC	Coeliac disease || id:finn-b-K11_COELIAC	CXCL11	0.0748528	0.0518276	0.174263
prot-a-738	finn-b-K11_COELIAC	Coeliac disease || id:finn-b-K11_COELIAC	CXCL10	-0.00675134	0.0442679	0.886168
prot-a-682	finn-b-K11_COELIAC	Coeliac disease || id:finn-b-K11_COELIAC	CSF2RA	-0.041098	0.0437643	0.372209
prot-a-681	finn-b-K11_COELIAC	Coeliac disease || id:finn-b-K11_COELIAC	GM-CSF	-0.0132273	0.0436534	0.770691
prot-a-686	finn-b-K11_COELIAC	Coeliac disease || id:finn-b-K11_COELIAC	GCSFR	0.0315085	0.0629894	0.634734
prot-a-685	finn-b-K11_COELIAC	Coeliac disease || id:finn-b-K11_COELIAC	GCSF	0.0164419	0.0482495	0.744893
prot-a-680	finn-b-K11_COELIAC	Coeliac disease || id:finn-b-K11_COELIAC	MCSF	-0.0472765	0.0685031	0.520827
prot-a-2982	finn-b-AUTOIMMUNE	Autoimmune diseases || id:finn-b-AUTOIMMUNE	TIRAP	0.00684533	0.00751464	0.380266
prot-a-1547	finn-b-AUTOIMMUNE	Autoimmune diseases || id:finn-b-AUTOIMMUNE	ILF3	0.0330601	0.0279147	0.28951
prot-a-749	finn-b-AUTOIMMUNE	Autoimmune diseases || id:finn-b-AUTOIMMUNE	IL8	0.00190018	0.00941441	0.843168
prot-a-1545	finn-b-AUTOIMMUNE	Autoimmune diseases || id:finn-b-AUTOIMMUNE	IL9	-0.00268409	0.0135298	0.847154
prot-a-1544	finn-b-AUTOIMMUNE	Autoimmune diseases || id:finn-b-AUTOIMMUNE	IL7RA	0.00215046	0.0183319	0.908731
prot-a-1543	finn-b-AUTOIMMUNE	Autoimmune diseases || id:finn-b-AUTOIMMUNE	IL7	-0.00449453	0.00921318	0.632282
prot-a-1542	finn-b-AUTOIMMUNE	Autoimmune diseases || id:finn-b-AUTOIMMUNE	IL6RB	-0.0069103	0.0102942	0.514755
prot-a-1540	finn-b-AUTOIMMUNE	Autoimmune diseases || id:finn-b-AUTOIMMUNE	IL6RA	-0.00404366	0.00834199	0.642664
prot-a-1538	finn-b-AUTOIMMUNE	Autoimmune diseases || id:finn-b-AUTOIMMUNE	IL6	-0.00902931	0.0076285	0.261508
prot-a-1536	finn-b-AUTOIMMUNE	Autoimmune diseases || id:finn-b-AUTOIMMUNE	IL5RA	-0.0189642	0.0222006	0.421254
prot-a-1534	finn-b-AUTOIMMUNE	Autoimmune diseases || id:finn-b-AUTOIMMUNE	IL5	0.000258722	0.0147389	0.986425
prot-a-1533	finn-b-AUTOIMMUNE	Autoimmune diseases || id:finn-b-AUTOIMMUNE	IL4RA	0.0194085	0.0108799	0.112283
prot-a-1532	finn-b-AUTOIMMUNE	Autoimmune diseases || id:finn-b-AUTOIMMUNE	IL4	-0.00214113	0.0160333	0.895539
prot-a-1530	finn-b-AUTOIMMUNE	Autoimmune diseases || id:finn-b-AUTOIMMUNE	IL3RA	-0.00211275	0.00917786	0.821518
prot-a-1529	finn-b-AUTOIMMUNE	Autoimmune diseases || id:finn-b-AUTOIMMUNE	IL37	0.0151073	0.00856365	0.105427
prot-a-1528	finn-b-AUTOIMMUNE	Autoimmune diseases || id:finn-b-AUTOIMMUNE	IL36 gamma	-0.0145567	0.0133131	0.306039
prot-a-1527	finn-b-AUTOIMMUNE	Autoimmune diseases || id:finn-b-AUTOIMMUNE	IL36 beta	0.0013958	0.00795286	0.863384
prot-a-1526	finn-b-AUTOIMMUNE	Autoimmune diseases || id:finn-b-AUTOIMMUNE	IL36 alpha	0.0663301	0.060214	0.296454
prot-a-1525	finn-b-AUTOIMMUNE	Autoimmune diseases || id:finn-b-AUTOIMMUNE	IL3	0.0247831	0.0117644	0.0731536
prot-a-1524	finn-b-AUTOIMMUNE	Autoimmune diseases || id:finn-b-AUTOIMMUNE	IL34	-0.00582572	0.00781018	0.46591
prot-a-1523	finn-b-AUTOIMMUNE	Autoimmune diseases || id:finn-b-AUTOIMMUNE	IL32	0.00250793	0.0126802	0.846525
prot-a-1521	finn-b-AUTOIMMUNE	Autoimmune diseases || id:finn-b-AUTOIMMUNE	IL31	-0.0327532	0.0143744	0.0458962
prot-a-1519	finn-b-AUTOIMMUNE	Autoimmune diseases || id:finn-b-AUTOIMMUNE	IL2RB	0.0324147	0.0436857	0.473634
prot-a-1518	finn-b-AUTOIMMUNE	Autoimmune diseases || id:finn-b-AUTOIMMUNE	IL2RA	0.00894527	0.0123638	0.496596
prot-a-1517	finn-b-AUTOIMMUNE	Autoimmune diseases || id:finn-b-AUTOIMMUNE	IL27RA	-0.00862504	0.00623203	0.19647
prot-a-1516	finn-b-AUTOIMMUNE	Autoimmune diseases || id:finn-b-AUTOIMMUNE	IL27	-0.0181742	0.0140086	0.211836
prot-a-1515	finn-b-AUTOIMMUNE	Autoimmune diseases || id:finn-b-AUTOIMMUNE	IL25	0.00412185	0.00611409	0.512022
prot-a-1514	finn-b-AUTOIMMUNE	Autoimmune diseases || id:finn-b-AUTOIMMUNE	IL24	0.00112331	0.0097274	0.909705
prot-a-1512	finn-b-AUTOIMMUNE	Autoimmune diseases || id:finn-b-AUTOIMMUNE	IL2	0.0278694	0.00942196	0.00880978
prot-a-1507	finn-b-AUTOIMMUNE	Autoimmune diseases || id:finn-b-AUTOIMMUNE	IL22	0.00546752	0.0097281	0.58298
prot-a-1506	finn-b-AUTOIMMUNE	Autoimmune diseases || id:finn-b-AUTOIMMUNE	IL21	0.0121146	0.0223806	0.59681
prot-a-1505	finn-b-AUTOIMMUNE	Autoimmune diseases || id:finn-b-AUTOIMMUNE	IL20	0.0355681	0.0144355	0.0905504
prot-a-1504	finn-b-AUTOIMMUNE	Autoimmune diseases || id:finn-b-AUTOIMMUNE	IL1RN	-0.00189102	0.00963842	0.84749
prot-a-1503	finn-b-AUTOIMMUNE	Autoimmune diseases || id:finn-b-AUTOIMMUNE	IL1RL2	0.0046293	0.0102045	0.660821
prot-a-1502	finn-b-AUTOIMMUNE	Autoimmune diseases || id:finn-b-AUTOIMMUNE	IL1RL1	0.00072957	0.00548051	0.895992
prot-a-1501	finn-b-AUTOIMMUNE	Autoimmune diseases || id:finn-b-AUTOIMMUNE	IL1RAPL2	0.0219376	0.0105504	0.0617722
prot-a-1499	finn-b-AUTOIMMUNE	Autoimmune diseases || id:finn-b-AUTOIMMUNE	IL1RAP	-0.0141592	0.00486288	0.014146
prot-a-1497	finn-b-AUTOIMMUNE	Autoimmune diseases || id:finn-b-AUTOIMMUNE	IL1R2	-0.00393949	0.0074154	0.606838
prot-a-1496	finn-b-AUTOIMMUNE	Autoimmune diseases || id:finn-b-AUTOIMMUNE	IL1R1	-0.000309464	0.00640663	0.962037
prot-a-1495	finn-b-AUTOIMMUNE	Autoimmune diseases || id:finn-b-AUTOIMMUNE	IL1B	-0.0104298	0.00942987	0.292312
prot-a-1494	finn-b-AUTOIMMUNE	Autoimmune diseases || id:finn-b-AUTOIMMUNE	IL1A	-0.00407374	0.00760886	0.601416
prot-a-1493	finn-b-AUTOIMMUNE	Autoimmune diseases || id:finn-b-AUTOIMMUNE	IL19	-0.00525679	0.00943899	0.58704
prot-a-1491	finn-b-AUTOIMMUNE	Autoimmune diseases || id:finn-b-AUTOIMMUNE	IL18R1	0.00783055	0.00527181	0.163239
prot-a-1490	finn-b-AUTOIMMUNE	Autoimmune diseases || id:finn-b-AUTOIMMUNE	IL18BP	0.0108479	0.0127441	0.41457
prot-a-1479	finn-b-AUTOIMMUNE	Autoimmune diseases || id:finn-b-AUTOIMMUNE	IL16	-0.0094182	0.00575822	0.1203
prot-a-1475	finn-b-AUTOIMMUNE	Autoimmune diseases || id:finn-b-AUTOIMMUNE	IL13	-0.00472852	0.0118972	0.698641
prot-a-1471	finn-b-AUTOIMMUNE	Autoimmune diseases || id:finn-b-AUTOIMMUNE	IL23	-0.00547754	0.0185599	0.772228
prot-a-1468	finn-b-AUTOIMMUNE	Autoimmune diseases || id:finn-b-AUTOIMMUNE	IL12	0.0070262	0.00833618	0.412548
prot-a-1467	finn-b-AUTOIMMUNE	Autoimmune diseases || id:finn-b-AUTOIMMUNE	IL11RA	0.0133689	0.00849587	0.154231
prot-a-1466	finn-b-AUTOIMMUNE	Autoimmune diseases || id:finn-b-AUTOIMMUNE	IL11	0.0194035	0.00924375	0.0596937
prot-a-1465	finn-b-AUTOIMMUNE	Autoimmune diseases || id:finn-b-AUTOIMMUNE	IL10RB	-0.00344095	0.00892543	0.706598
prot-a-1464	finn-b-AUTOIMMUNE	Autoimmune diseases || id:finn-b-AUTOIMMUNE	IL10	0.00891086	0.0101577	0.414092
prot-a-2965	finn-b-AUTOIMMUNE	Autoimmune diseases || id:finn-b-AUTOIMMUNE	TGFB3	-0.00447875	0.00949185	0.646254
prot-a-2964	finn-b-AUTOIMMUNE	Autoimmune diseases || id:finn-b-AUTOIMMUNE	TGFB2	0.00554912	0.00847818	0.525125
prot-a-2962	finn-b-AUTOIMMUNE	Autoimmune diseases || id:finn-b-AUTOIMMUNE	TGFB1	0.0193384	0.011902	0.142858
prot-a-2961	finn-b-AUTOIMMUNE	Autoimmune diseases || id:finn-b-AUTOIMMUNE	TGFA	-0.0335559	0.0318914	0.327672
prot-a-411	finn-b-AUTOIMMUNE	Autoimmune diseases || id:finn-b-AUTOIMMUNE	CCL8	-0.019016	0.0164241	0.267769
prot-a-410	finn-b-AUTOIMMUNE	Autoimmune diseases || id:finn-b-AUTOIMMUNE	CCL7	0.00162508	0.00598565	0.789711
prot-a-409	finn-b-AUTOIMMUNE	Autoimmune diseases || id:finn-b-AUTOIMMUNE	CCL5	0.0216828	0.00825973	0.0199757
prot-a-398	finn-b-AUTOIMMUNE	Autoimmune diseases || id:finn-b-AUTOIMMUNE	CCL22	0.00275263	0.0113805	0.812385
prot-a-396	finn-b-AUTOIMMUNE	Autoimmune diseases || id:finn-b-AUTOIMMUNE	CCL20	0.0353258	0.0182373	0.0939482
prot-a-407	finn-b-AUTOIMMUNE	Autoimmune diseases || id:finn-b-AUTOIMMUNE	CCL3	-0.00744721	0.00605337	0.244261
prot-a-394	finn-b-AUTOIMMUNE	Autoimmune diseases || id:finn-b-AUTOIMMUNE	CCL17	0.00763158	0.00618891	0.236513
prot-a-389	finn-b-AUTOIMMUNE	Autoimmune diseases || id:finn-b-AUTOIMMUNE	CCL13	-0.00875682	0.00949325	0.369214
prot-a-388	finn-b-AUTOIMMUNE	Autoimmune diseases || id:finn-b-AUTOIMMUNE	CCL1	-0.0202331	0.00734274	0.0187051
prot-a-745	finn-b-AUTOIMMUNE	Autoimmune diseases || id:finn-b-AUTOIMMUNE	CXCL16	-0.0288346	0.0344817	0.412441
prot-a-750	finn-b-AUTOIMMUNE	Autoimmune diseases || id:finn-b-AUTOIMMUNE	CXCL9	-0.002347	0.0135621	0.866906
prot-a-744	finn-b-AUTOIMMUNE	Autoimmune diseases || id:finn-b-AUTOIMMUNE	CXCL14	-0.00501589	0.012826	0.704841
prot-a-743	finn-b-AUTOIMMUNE	Autoimmune diseases || id:finn-b-AUTOIMMUNE	CXCL13	-0.0249339	0.0116308	0.0500936
prot-a-748	finn-b-AUTOIMMUNE	Autoimmune diseases || id:finn-b-AUTOIMMUNE	CXCL5	-0.00727489	0.00873503	0.424379
prot-a-739	finn-b-AUTOIMMUNE	Autoimmune diseases || id:finn-b-AUTOIMMUNE	CXCL11	0.0578429	0.0295215	0.0737162
prot-a-738	finn-b-AUTOIMMUNE	Autoimmune diseases || id:finn-b-AUTOIMMUNE	CXCL10	-0.00682235	0.00828461	0.45649
prot-a-682	finn-b-AUTOIMMUNE	Autoimmune diseases || id:finn-b-AUTOIMMUNE	CSF2RA	-0.00262535	0.00897457	0.776512
prot-a-681	finn-b-AUTOIMMUNE	Autoimmune diseases || id:finn-b-AUTOIMMUNE	GM-CSF	0.0128916	0.0113666	0.294068
prot-a-686	finn-b-AUTOIMMUNE	Autoimmune diseases || id:finn-b-AUTOIMMUNE	GCSFR	-0.0177802	0.025865	0.517493
prot-a-685	finn-b-AUTOIMMUNE	Autoimmune diseases || id:finn-b-AUTOIMMUNE	GCSF	-0.00404204	0.0170867	0.820867
prot-a-680	finn-b-AUTOIMMUNE	Autoimmune diseases || id:finn-b-AUTOIMMUNE	MCSF	-0.0110985	0.0135977	0.4515
AL amyloidosis	prot-a-2982	Toll/interleukin-1 receptor domain-containing adapter protein || id:prot-a-2982	AL amyloidosis	-0.00264418	0.0726082	0.972131
AL amyloidosis	prot-a-1547	Interleukin enhancer-binding factor 3 || id:prot-a-1547	AL amyloidosis	-0.0859407	0.0726082	0.281327
AL amyloidosis	prot-a-749	Interleukin-8 || id:prot-a-749	AL amyloidosis	-0.0365952	0.072637	0.632355
AL amyloidosis	prot-a-1545	Interleukin-9 || id:prot-a-1545	AL amyloidosis	-0.00844854	0.072637	0.911201
AL amyloidosis	prot-a-1544	Interleukin-7 receptor subunit alpha || id:prot-a-1544	AL amyloidosis	-0.171589	0.072637	0.056109
AL amyloidosis	prot-a-1543	Interleukin-7 || id:prot-a-1543	AL amyloidosis	0.0376044	0.072637	0.623192
AL amyloidosis	prot-a-1542	Interleukin-6 receptor subunit beta || id:prot-a-1542	AL amyloidosis	0.0698888	0.0726082	0.372947
AL amyloidosis	prot-a-1540	Interleukin-6 receptor subunit alpha || id:prot-a-1540	AL amyloidosis	0.0795492	0.072637	0.315448
AL amyloidosis	prot-a-1538	Interleukin-6 || id:prot-a-1538	AL amyloidosis	-0.0442641	0.072637	0.564614
AL amyloidosis	prot-a-1536	Interleukin-5 receptor subunit alpha || id:prot-a-1536	AL amyloidosis	-0.132383	0.130726	0.350297
AL amyloidosis	prot-a-1534	Interleukin-5 || id:prot-a-1534	AL amyloidosis	0.0210552	0.072637	0.781673
AL amyloidosis	prot-a-1533	Interleukin-4 receptor subunit alpha || id:prot-a-1533	AL amyloidosis	0.0332473	0.072637	0.663262
AL amyloidosis	prot-a-1532	Interleukin-4 || id:prot-a-1532	AL amyloidosis	-0.106156	0.0726082	0.194047
AL amyloidosis	prot-a-1530	Interleukin-3 receptor subunit alpha || id:prot-a-1530	AL amyloidosis	0.104445	0.072637	0.200502
AL amyloidosis	prot-a-1529	Interleukin-37 || id:prot-a-1529	AL amyloidosis	0.0596212	0.0733794	0.447532
AL amyloidosis	prot-a-1528	Interleukin-36 gamma || id:prot-a-1528	AL amyloidosis	0.135402	0.101932	0.232351
AL amyloidosis	prot-a-1527	Interleukin-36 beta || id:prot-a-1527	AL amyloidosis	0.0377479	0.072637	0.621894
AL amyloidosis	prot-a-1526	Interleukin-36 alpha || id:prot-a-1526	AL amyloidosis	0.183831	0.0730298	0.0454582
AL amyloidosis	prot-a-1525	Interleukin-3 || id:prot-a-1525	AL amyloidosis	-0.166303	0.109257	0.178803
AL amyloidosis	prot-a-1524	Interleukin-34 || id:prot-a-1524	AL amyloidosis	0.0297873	0.0796483	0.721275
AL amyloidosis	prot-a-1523	Interleukin-32 || id:prot-a-1523	AL amyloidosis	-0.0591905	0.072637	0.446272
AL amyloidosis	prot-a-1521	Interleukin-31 || id:prot-a-1521	AL amyloidosis	0.0289278	0.072637	0.70423
AL amyloidosis	prot-a-1519	Interleukin-2 receptor subunit beta || id:prot-a-1519	AL amyloidosis	0.0925891	0.0879194	0.33284
AL amyloidosis	prot-a-1518	Interleukin-2 receptor subunit alpha || id:prot-a-1518	AL amyloidosis	-0.0964609	0.0828596	0.288556
AL amyloidosis	prot-a-1517	Interleukin-27 receptor subunit alpha || id:prot-a-1517	AL amyloidosis	0.0240644	0.098397	0.814942
AL amyloidosis	prot-a-1516	Interleukin-27 || id:prot-a-1516	AL amyloidosis	-0.0282636	0.0767312	0.725262
AL amyloidosis	prot-a-1515	Interleukin-25 || id:prot-a-1515	AL amyloidosis	0.0962632	0.0820111	0.28496
AL amyloidosis	prot-a-1514	Interleukin-24 || id:prot-a-1514	AL amyloidosis	-0.0488044	0.107631	0.666167
AL amyloidosis	prot-a-1512	Interleukin-2 || id:prot-a-1512	AL amyloidosis	0.0546309	0.0784351	0.512175
AL amyloidosis	prot-a-1507	Interleukin-22 || id:prot-a-1507	AL amyloidosis	-0.0969407	0.0726082	0.230259
AL amyloidosis	prot-a-1506	Interleukin-21 || id:prot-a-1506	AL amyloidosis	-0.0164179	0.0726082	0.828617
AL amyloidosis	prot-a-1505	Interleukin-20 || id:prot-a-1505	AL amyloidosis	-0.130598	0.0726082	0.122179
AL amyloidosis	prot-a-1504	Interleukin-1 receptor antagonist protein || id:prot-a-1504	AL amyloidosis	-0.0564105	0.0726082	0.466724
AL amyloidosis	prot-a-1503	Interleukin-1 receptor-like 2 || id:prot-a-1503	AL amyloidosis	-0.178146	0.0726082	0.0495535
AL amyloidosis	prot-a-1502	Interleukin-1 receptor-like 1 || id:prot-a-1502	AL amyloidosis	-0.0992324	0.072637	0.220881
AL amyloidosis	prot-a-1501	X-linked interleukin-1 receptor accessory protein-like 2 || id:prot-a-1501	AL amyloidosis	-0.0403036	0.072637	0.599047
AL amyloidosis	prot-a-1499	Interleukin-1 Receptor accessory protein || id:prot-a-1499	AL amyloidosis	0.0377822	0.0739272	0.627555
AL amyloidosis	prot-a-1497	Interleukin-1 receptor type 2 || id:prot-a-1497	AL amyloidosis	0.0133308	0.072637	0.86043
AL amyloidosis	prot-a-1496	Interleukin-1 receptor type 1 || id:prot-a-1496	AL amyloidosis	0.0783525	0.0849963	0.392174
AL amyloidosis	prot-a-1495	Interleukin-1 beta || id:prot-a-1495	AL amyloidosis	-0.141374	0.0832832	0.140521
AL amyloidosis	prot-a-1494	Interleukin-1 alpha || id:prot-a-1494	AL amyloidosis	-0.078287	0.0864429	0.400026
AL amyloidosis	prot-a-1493	Interleukin-19 || id:prot-a-1493	AL amyloidosis	-0.0479326	0.0862391	0.598439
AL amyloidosis	prot-a-1491	Interleukin-18 receptor 1 || id:prot-a-1491	AL amyloidosis	0.0281975	0.098452	0.784197
AL amyloidosis	prot-a-1490	Interleukin-18-binding protein || id:prot-a-1490	AL amyloidosis	0.130777	0.0737322	0.12648
AL amyloidosis	prot-a-1479	Interleukin-16 || id:prot-a-1479	AL amyloidosis	-0.0908786	0.0843906	0.322915
AL amyloidosis	prot-a-1475	Interleukin-13 || id:prot-a-1475	AL amyloidosis	-0.012959	0.072637	0.864274
AL amyloidosis	prot-a-1471	Interleukin-23 || id:prot-a-1471	AL amyloidosis	0.138186	0.072637	0.105814
AL amyloidosis	prot-a-1468	Interleukin-12 || id:prot-a-1468	AL amyloidosis	0.0106196	0.072637	0.888551
AL amyloidosis	prot-a-1467	Interleukin-11 receptor subunit alpha || id:prot-a-1467	AL amyloidosis	0.057334	0.072637	0.459969
AL amyloidosis	prot-a-1466	Interleukin-11 || id:prot-a-1466	AL amyloidosis	-0.107942	0.072637	0.187816
AL amyloidosis	prot-a-1465	Interleukin-10 receptor subunit beta || id:prot-a-1465	AL amyloidosis	0.0442235	0.0786685	0.594376
AL amyloidosis	prot-a-1464	Interleukin-10 || id:prot-a-1464	AL amyloidosis	-0.113176	0.0726082	0.170076
AL amyloidosis	prot-a-2965	Transforming growth factor beta-3 || id:prot-a-2965	AL amyloidosis	-0.0544283	0.072637	0.481999
AL amyloidosis	prot-a-2964	Transforming growth factor beta-2 || id:prot-a-2964	AL amyloidosis	-0.112076	0.072637	0.173784
AL amyloidosis	prot-a-2962	Transforming growth factor beta-1 || id:prot-a-2962	AL amyloidosis	-0.102156	0.072637	0.20923
AL amyloidosis	prot-a-2961	Transforming growth factor alpha || id:prot-a-2961	AL amyloidosis	-0.0307572	0.0783799	0.708314
AL amyloidosis	prot-a-411	C-C motif chemokine 8 || id:prot-a-411	AL amyloidosis	-0.0328894	0.072637	0.666611
AL amyloidosis	prot-a-410	C-C motif chemokine 7 || id:prot-a-410	AL amyloidosis	0.000816446	0.072637	0.991396
AL amyloidosis	prot-a-409	C-C motif chemokine 5 || id:prot-a-409	AL amyloidosis	0.00926119	0.0757309	0.906662
AL amyloidosis	prot-a-398	C-C motif chemokine 22 || id:prot-a-398	AL amyloidosis	-0.0540445	0.140801	0.714334
AL amyloidosis	prot-a-396	C-C motif chemokine 20 || id:prot-a-396	AL amyloidosis	-0.169319	0.072637	0.0585582
AL amyloidosis	prot-a-407	C-C motif chemokine 3 || id:prot-a-407	AL amyloidosis	-0.030673	0.0783798	0.709067
AL amyloidosis	prot-a-394	C-C motif chemokine 17 || id:prot-a-394	AL amyloidosis	0.00480978	0.0820188	0.955141
AL amyloidosis	prot-a-389	C-C motif chemokine 13 || id:prot-a-389	AL amyloidosis	-0.133648	0.072637	0.115388
AL amyloidosis	prot-a-388	C-C motif chemokine 1 || id:prot-a-388	AL amyloidosis	0.098274	0.0856623	0.294967
AL amyloidosis	prot-a-745	C-X-C motif chemokine 16 || id:prot-a-745	AL amyloidosis	0.0478925	0.0803351	0.572857
AL amyloidosis	prot-a-750	C-X-C motif chemokine 9 || id:prot-a-750	AL amyloidosis	0.110441	0.0776421	0.204743
AL amyloidosis	prot-a-744	C-X-C motif chemokine 14 || id:prot-a-744	AL amyloidosis	-0.100902	0.0726082	0.213997
AL amyloidosis	prot-a-743	C-X-C motif chemokine 13 || id:prot-a-743	AL amyloidosis	0.0313546	0.116024	0.796029
AL amyloidosis	prot-a-748	C-X-C motif chemokine 5 || id:prot-a-748	AL amyloidosis	-0.114864	0.072637	0.164884
AL amyloidosis	prot-a-739	C-X-C motif chemokine 11 || id:prot-a-739	AL amyloidosis	-0.0206829	0.072637	0.785413
AL amyloidosis	prot-a-738	C-X-C motif chemokine 10 || id:prot-a-738	AL amyloidosis	0.100577	0.072637	0.215451
AL amyloidosis	prot-a-682	Granulocyte-macrophage colony-stimulating factor receptor subunit alpha || id:prot-a-682	AL amyloidosis	0.0593481	0.0904774	0.536188
AL amyloidosis	prot-a-681	Granulocyte-macrophage colony-stimulating factor || id:prot-a-681	AL amyloidosis	-0.0549202	0.072637	0.478219
AL amyloidosis	prot-a-686	Granulocyte colony-stimulating factor receptor || id:prot-a-686	AL amyloidosis	-0.00122059	0.072637	0.987138
AL amyloidosis	prot-a-685	Granulocyte colony-stimulating factor || id:prot-a-685	AL amyloidosis	-0.0795165	0.072637	0.315631
AL amyloidosis	prot-a-680	Macrophage colony-stimulating factor 1 || id:prot-a-680	AL amyloidosis	-0.043858	0.102166	0.682706
AL amyloidosis	prot-a-680	Macrophage colony-stimulating factor 1 || id:prot-a-680	AL amyloidosis	-0.043858	0.102166	0.682706
