# Supplementary material for: Causal Effects of AL Amyloidosis on Autoimmune Diseases and the Role of Inflammatory Cytokines: Insights from Mendelian Randomization
Source: Research Square preprint supplement (doi:10.21203/rs.3.rs-7503974/v1), 2025-10-15
Supplement: Supplementary file 3 [file 8f3e8262d43d1828e3ed11b5.xlsx]

## Sheet: al amyloidosis_if
Odds Ratios and Confidence Intervals for AL Amyloidosis in Relation to Inflammatory Cytokines
Inflammatory_factors	nsnp	OR	beta	Pval	lo_ci	up_ci	se	or_lci95	or_uci95
MCSF
MR Egger	8	1.13552	0.127087	0.767481	-0.677991	0.932164	0.410754	0.507636	2.54
Weighted median	8	1.01517	0.0150586	0.794186	-0.0980775	0.128195	0.0577225	0.906579	1.13677
Inverse variance weighted	8	0.95359	-0.0475218	0.376988	-0.152951	0.0579078	0.0537906	0.858171	1.05962
Simple mode	8	1.03134	0.0308548	0.71391	-0.127526	0.189235	0.0808065	0.880271	1.20833
Weighted mode	8	1.04018	0.0393926	0.596037	-0.0996702	0.178455	0.0709504	0.905136	1.19537
GCSF
MR Egger	8	1.39478	0.332739	0.297976	-0.239645	0.905122	0.292032	0.786907	2.47223
Weighted median	8	1.05517	0.0537063	0.293324	-0.0464638	0.153876	0.0511072	0.954599	1.16635
Inverse variance weighted	8	1.0163	0.0161655	0.691139	-0.0635819	0.0959129	0.0406874	0.938397	1.10066
Simple mode	8	1.06861	0.0663585	0.444229	-0.0940766	0.226794	0.0818547	0.910213	1.25457
Weighted mode	8	1.07335	0.0707858	0.393452	-0.0818036	0.223375	0.0778517	0.921453	1.25029
GCSFR
MR Egger	8	1.00744	0.00741643	0.980563	-0.564967	0.5798	0.292032	0.568379	1.78568
Weighted median	8	0.995766	-0.00424339	0.935044	-0.106292	0.0978055	0.0520658	0.899162	1.10275
Inverse variance weighted	8	1.00256	0.00255697	0.949891	-0.0771904	0.0823044	0.0406874	0.925714	1.08579
Simple mode	8	1.00843	0.00839674	0.915205	-0.1407	0.157494	0.0760699	0.86875	1.17057
Weighted mode	8	1.00362	0.00361045	0.962162	-0.140324	0.147545	0.0734361	0.869076	1.15899
GM-CSF
MR Egger	8	1.24244	0.217081	0.48535	-0.355303	0.789464	0.292032	0.700961	2.20222
Weighted median	8	0.981359	-0.0188167	0.712637	-0.11895	0.0813165	0.0510884	0.887852	1.08471
Inverse variance weighted	8	0.998433	-0.00156853	0.969249	-0.0813159	0.0781789	0.0406874	0.921902	1.08132
Simple mode	8	0.942649	-0.0590615	0.520811	-0.230334	0.112211	0.087384	0.794268	1.11875
Weighted mode	8	0.958672	-0.0422064	0.604115	-0.194611	0.110198	0.0777574	0.823155	1.1165
CSF2RA
MR Egger	8	0.815929	-0.203428	0.596276	-0.91647	0.509613	0.363797	0.399928	1.66465
Weighted median	8	1.0247	0.0243963	0.667134	-0.0867835	0.135576	0.0567244	0.916876	1.1452
Inverse variance weighted	8	1.03342	0.032875	0.498552	-0.0623345	0.128084	0.0485762	0.939569	1.13665
Simple mode	8	0.923253	-0.0798518	0.490565	-0.295003	0.1353	0.109771	0.744529	1.14488
Weighted mode	8	0.94121	-0.0605889	0.499446	-0.227356	0.106179	0.0850855	0.796637	1.11202
CXCL10
MR Egger	8	0.638678	-0.448354	0.175616	-1.02074	0.124029	0.292032	0.360329	1.13205
Weighted median	8	0.963375	-0.037313	0.511658	-0.148753	0.0741273	0.0568573	0.861782	1.07694
Inverse variance weighted	8	0.953196	-0.0479343	0.261387	-0.131586	0.0357178	0.0426796	0.876704	1.03636
Simple mode	8	0.985561	-0.0145444	0.881758	-0.199343	0.170254	0.0942848	0.819269	1.18561
Weighted mode	8	0.997635	-0.00236734	0.982181	-0.202843	0.198108	0.102283	0.816406	1.21909
CXCL11
MR Egger	8	1.07715	0.0743214	0.807609	-0.498062	0.646705	0.292032	0.607707	1.90924
Weighted median	8	1.00805	0.00802135	0.882823	-0.0986454	0.114688	0.0544218	0.906064	1.12152
Inverse variance weighted	8	0.99201	-0.008022	0.843701	-0.0877694	0.0717254	0.0406874	0.915972	1.07436
Simple mode	8	1.00699	0.00696077	0.933484	-0.150745	0.164667	0.0804623	0.860067	1.179
Weighted mode	8	1.01	0.00994626	0.894252	-0.131488	0.151381	0.0721605	0.87679	1.16344
CXCL5
MR Egger	8	1.65548	0.50409	0.135073	-0.0682936	1.07647	0.292032	0.933986	2.93431
Weighted median	8	1.06714	0.0649862	0.248482	-0.0453847	0.175357	0.0563117	0.95563	1.19167
Inverse variance weighted	8	1.0479	0.0467908	0.270311	-0.0364044	0.129986	0.0424465	0.96425	1.13881
Simple mode	8	1.06269	0.0608032	0.508926	-0.110447	0.232053	0.0873726	0.895434	1.26119
Weighted mode	8	1.06598	0.0638936	0.438683	-0.088633	0.21642	0.0778197	0.915181	1.24162
CXCL13
MR Egger	8	0.825846	-0.191347	0.695931	-1.10572	0.723023	0.466515	0.330974	2.06065
Weighted median	8	0.946443	-0.0550447	0.334305	-0.16679	0.0567003	0.0570128	0.846378	1.05834
Inverse variance weighted	8	0.935659	-0.0665037	0.271957	-0.185156	0.0521484	0.0605368	0.830975	1.05353
Simple mode	8	0.982806	-0.0173438	0.850218	-0.190829	0.156141	0.0885127	0.826274	1.16899
Weighted mode	8	0.978381	-0.0218561	0.782291	-0.171025	0.127313	0.0761065	0.842801	1.13577
CXCL14
MR Egger	8	1.41475	0.346952	0.279575	-0.225265	0.919169	0.291947	0.798305	2.50721
Weighted median	8	0.972144	-0.0282517	0.609596	-0.136688	0.080185	0.0553249	0.872242	1.08349
Inverse variance weighted	8	0.946669	-0.0548055	0.177828	-0.134524	0.0249132	0.0406728	0.874132	1.02523
Simple mode	8	0.995695	-0.00431382	0.95629	-0.153165	0.144537	0.0759443	0.857988	1.1555
Weighted mode	8	0.986711	-0.013378	0.853752	-0.150474	0.123718	0.069947	0.8603	1.1317
CXCL9
MR Egger	8	0.670635	-0.399531	0.247878	-1.01142	0.212358	0.312188	0.363702	1.23659
Weighted median	8	1.0452	0.0442062	0.431679	-0.0659829	0.154395	0.056219	0.936147	1.16695
Inverse variance weighted	8	1.04103	0.0402062	0.387877	-0.0510579	0.13147	0.0465633	0.950224	1.1405
Simple mode	8	1.15727	0.146066	0.182422	-0.0473763	0.339509	0.0986952	0.953728	1.40426
Weighted mode	8	1.08476	0.0813544	0.361762	-0.0820873	0.244796	0.0833886	0.921192	1.27736
CXCL16
MR Egger	8	0.846825	-0.166262	0.62512	-0.799307	0.466784	0.322982	0.449641	1.59486
Weighted median	8	1.01317	0.0130883	0.812552	-0.0950909	0.121268	0.0551935	0.90929	1.12893
Inverse variance weighted	8	1.02471	0.0244091	0.569171	-0.059631	0.108449	0.0428776	0.942112	1.11455
Simple mode	8	0.950213	-0.0510688	0.591577	-0.229138	0.127001	0.0908518	0.795218	1.13542
Weighted mode	8	0.967169	-0.0333821	0.684054	-0.187572	0.120807	0.0786681	0.82897	1.12841
CCL1
MR Egger	8	0.672509	-0.396739	0.293202	-1.07183	0.278355	0.344436	0.34238	1.32095
Weighted median	8	0.950615	-0.0506457	0.366844	-0.160647	0.0593561	0.0561233	0.851592	1.06115
Inverse variance weighted	8	0.994568	-0.00544727	0.911585	-0.101599	0.0907042	0.0490569	0.903392	1.09495
Simple mode	8	0.923969	-0.0790769	0.35557	-0.235778	0.0776244	0.0799496	0.789956	1.08072
Weighted mode	8	0.932506	-0.0698801	0.333023	-0.201606	0.0618463	0.0672073	0.817417	1.0638
CCL13
MR Egger	8	1.78811	0.581156	0.0937107	0.00877289	1.15354	0.292032	1.00881	3.16939
Weighted median	8	1.05063	0.0493926	0.381211	-0.0611626	0.159948	0.0564057	0.94067	1.17345
Inverse variance weighted	8	1.0503	0.0490759	0.289808	-0.0417931	0.139945	0.0463618	0.959068	1.15021
Simple mode	8	1.0333	0.0327529	0.696196	-0.124993	0.190498	0.0804823	0.882503	1.20985
Weighted mode	8	1.03195	0.0314493	0.677551	-0.110675	0.173573	0.0725122	0.89523	1.18955
CCL17
MR Egger	8	1.01168	0.0116083	0.973062	-0.634772	0.657988	0.329786	0.530056	1.9309
Weighted median	8	1.05072	0.0494735	0.387615	-0.0627644	0.161711	0.0572642	0.939165	1.17552
Inverse variance weighted	8	1.03124	0.0307592	0.469727	-0.0526356	0.114154	0.0425484	0.948726	1.12092
Simple mode	8	1.05159	0.0502987	0.589533	-0.124102	0.2247	0.0889801	0.883289	1.25195
Weighted mode	8	1.08006	0.0770207	0.433258	-0.104582	0.258623	0.0926543	0.900701	1.29515
CCL3
MR Egger	8	1.08543	0.0819802	0.803445	-0.535668	0.699628	0.315127	0.585278	2.013
Weighted median	8	0.969208	-0.0312759	0.552164	-0.134385	0.0718336	0.0526069	0.874253	1.07448
Inverse variance weighted	8	0.960656	-0.0401387	0.329375	-0.120797	0.0405195	0.0411521	0.886214	1.04135
Simple mode	8	0.930654	-0.0718676	0.399938	-0.229051	0.0853158	0.0801956	0.795288	1.08906
Weighted mode	8	0.940283	-0.061574	0.431314	-0.206115	0.0829671	0.0737455	0.813739	1.08651
CCL20
MR Egger	8	1.84749	0.613828	0.0802645	0.0414448	1.18621	0.292032	1.04232	3.27465
Weighted median	8	0.899316	-0.106121	0.0757293	-0.223235	0.0109931	0.0597521	0.799927	1.01105
Inverse variance weighted	8	0.941512	-0.0602682	0.232995	-0.159311	0.0387742	0.0505318	0.852731	1.03954
Simple mode	8	0.855419	-0.156164	0.117526	-0.327689	0.0153618	0.087513	0.720587	1.01548
Weighted mode	8	0.863776	-0.146441	0.173987	-0.336119	0.043236	0.0967742	0.714538	1.04418
CCL22
MR Egger	8	1.20055	0.182781	0.757761	-0.926856	1.29242	0.566141	0.395796	3.64158
Weighted median	8	1.04345	0.0425356	0.459503	-0.0701773	0.155249	0.0575066	0.932228	1.16795
Inverse variance weighted	8	0.968114	-0.0324054	0.661076	-0.177274	0.112464	0.0739127	0.83755	1.11903
Simple mode	8	1.05123	0.0499615	0.514907	-0.0928284	0.192751	0.072852	0.91135	1.21258
Weighted mode	8	1.05718	0.0556089	0.461509	-0.0843091	0.195527	0.0713867	0.919147	1.21595
CCL5
MR Egger	8	0.988337	-0.0117314	0.970518	-0.608558	0.585095	0.304503	0.544135	1.79516
Weighted median	8	1.02015	0.0199467	0.709762	-0.0850993	0.124993	0.0535949	0.918421	1.13314
Inverse variance weighted	8	1.02546	0.0251433	0.536453	-0.0545754	0.104862	0.0406728	0.946887	1.11056
Simple mode	8	1.01002	0.00996661	0.90297	-0.14458	0.164514	0.0788505	0.865385	1.17882
Weighted mode	8	1.01393	0.0138318	0.861163	-0.135584	0.163248	0.0762326	0.873206	1.17733
CCL7
MR Egger	8	0.963318	-0.0373717	0.902353	-0.609755	0.535012	0.292032	0.543484	1.70747
Weighted median	8	0.98058	-0.0196107	0.715286	-0.124985	0.0857636	0.0537624	0.88251	1.08955
Inverse variance weighted	8	0.966454	-0.0341213	0.401683	-0.113869	0.0456261	0.0406874	0.892375	1.04668
Simple mode	8	0.977402	-0.022857	0.782403	-0.178939	0.133225	0.0796338	0.836157	1.14251
Weighted mode	8	0.977402	-0.022857	0.777723	-0.175547	0.129833	0.0779033	0.838998	1.13864
CCL8
MR Egger	8	1.05849	0.0568437	0.852092	-0.51554	0.629227	0.292032	0.597178	1.87616
Weighted median	8	0.933356	-0.0689683	0.198994	-0.174212	0.0362758	0.0536959	0.840118	1.03694
Inverse variance weighted	8	0.928582	-0.0740965	0.0685894	-0.153844	0.00565089	0.0406874	0.857406	1.00567
Simple mode	8	0.932517	-0.0698678	0.453908	-0.242593	0.102858	0.0881253	0.784591	1.10833
Weighted mode	8	0.928067	-0.0746515	0.407517	-0.240721	0.0914177	0.0847292	0.786061	1.09573
TGFA
MR Egger	8	1.14081	0.131737	0.690459	-0.485901	0.749374	0.315121	0.615143	2.11568
Weighted median	8	1.03059	0.0301312	0.603768	-0.0836615	0.143924	0.0580575	0.919743	1.1548
Inverse variance weighted	8	1.00933	0.00928545	0.821542	-0.0713995	0.0899703	0.0411658	0.93109	1.09414
Simple mode	8	1.05032	0.0490923	0.649332	-0.153529	0.251714	0.103378	0.857676	1.28623
Weighted mode	8	1.06019	0.0584524	0.588128	-0.14344	0.260345	0.103006	0.866373	1.29738
TGFB1
MR Egger	8	1.49588	0.402717	0.217092	-0.169667	0.9751	0.292032	0.843946	2.65143
Weighted median	8	1.02699	0.0266359	0.617241	-0.0778261	0.131098	0.0532969	0.925125	1.14008
Inverse variance weighted	8	0.996019	-0.00398921	0.921896	-0.0837366	0.0757582	0.0406874	0.919673	1.0787
Simple mode	8	1.0308	0.0303332	0.712007	-0.124283	0.184949	0.0788857	0.88313	1.20316
Weighted mode	8	1.04024	0.0394536	0.577339	-0.0928852	0.171792	0.0675198	0.911298	1.18743
TGFB2
MR Egger	8	1.50799	0.410776	0.209168	-0.161608	0.983159	0.292032	0.850775	2.67289
Weighted median	8	0.956434	-0.0445434	0.438449	-0.157222	0.0681353	0.0574891	0.854514	1.07051
Inverse variance weighted	8	0.965196	-0.0354237	0.417088	-0.120984	0.0501362	0.043653	0.886048	1.05141
Simple mode	8	0.947796	-0.0536164	0.586129	-0.237796	0.130563	0.0939693	0.788363	1.13947
Weighted mode	8	0.934975	-0.067235	0.543958	-0.273886	0.139416	0.105434	0.760419	1.1496
TGFB3
MR Egger	8	1.18422	0.169085	0.58366	-0.403299	0.741468	0.292032	0.668112	2.09902
Weighted median	8	0.975024	-0.025293	0.631252	-0.12858	0.0779943	0.0526976	0.879343	1.08112
Inverse variance weighted	8	0.953509	-0.0476063	0.241982	-0.127354	0.0321411	0.0406874	0.880422	1.03266
Simple mode	8	0.989494	-0.0105619	0.905104	-0.178045	0.156921	0.0854507	0.836905	1.1699
Weighted mode	8	1.00391	0.00390017	0.964565	-0.16214	0.169941	0.0847145	0.850322	1.18523
IL10
MR Egger	8	1.5526	0.439933	0.182558	-0.132284	1.01215	0.291947	0.876092	2.75151
Weighted median	8	1.01414	0.014041	0.792703	-0.0906783	0.11876	0.0534283	0.913311	1.1261
Inverse variance weighted	8	0.989363	-0.0106935	0.800324	-0.0935603	0.0721732	0.042279	0.910683	1.07484
Simple mode	8	1.00889	0.00884614	0.924315	-0.167221	0.184913	0.08983	0.846013	1.20311
Weighted mode	8	1.0381	0.0373915	0.66357	-0.124034	0.198817	0.08236	0.88335	1.21996
IL10RB
MR Egger	8	0.814422	-0.205276	0.540352	-0.825188	0.414636	0.316282	0.438153	1.51382
Weighted median	8	1.0266	0.0262498	0.624976	-0.0790051	0.131505	0.0537015	0.924035	1.14054
Inverse variance weighted	8	0.97121	-0.0292124	0.485241	-0.111254	0.0528287	0.0418577	0.894712	1.05425
Simple mode	8	1.04074	0.0399287	0.655123	-0.127882	0.20774	0.0856178	0.879957	1.23089
Weighted mode	8	1.04791	0.0468006	0.574252	-0.108888	0.202489	0.0794329	0.896831	1.22445
IL11
MR Egger	8	1.43879	0.363805	0.259288	-0.208578	0.936189	0.292032	0.811737	2.55024
Weighted median	8	0.96601	-0.034581	0.503225	-0.13583	0.0666683	0.0516578	0.872991	1.06894
Inverse variance weighted	8	0.936191	-0.0659361	0.105114	-0.145683	0.0138113	0.0406874	0.864431	1.01391
Simple mode	8	0.979625	-0.0205856	0.802769	-0.176111	0.13494	0.0793498	0.838525	1.14447
Weighted mode	8	0.9857	-0.0144029	0.858477	-0.166999	0.138193	0.077855	0.846201	1.1482
IL11RA
MR Egger	8	0.796981	-0.226924	0.46665	-0.799308	0.345459	0.292032	0.44964	1.41264
Weighted median	8	0.985956	-0.0141436	0.773164	-0.110319	0.0820317	0.049069	0.895548	1.08549
Inverse variance weighted	8	1.00134	0.00133521	0.973821	-0.0784122	0.0810826	0.0406874	0.924583	1.08446
Simple mode	8	0.982566	-0.0175876	0.809998	-0.155647	0.120472	0.0704386	0.855861	1.12803
Weighted mode	8	0.984699	-0.0154197	0.827663	-0.149151	0.118312	0.0682304	0.861439	1.1256
IL12
MR Egger	8	0.951687	-0.0495189	0.870924	-0.621902	0.522865	0.292032	0.536922	1.68685
Weighted median	8	0.993468	-0.00655388	0.897902	-0.106666	0.093558	0.0510775	0.898826	1.09807
Inverse variance weighted	8	0.992786	-0.00723971	0.858774	-0.0869871	0.0725077	0.0406874	0.916689	1.0752
Simple mode	8	1.03753	0.0368447	0.648131	-0.114662	0.188351	0.0772993	0.891668	1.20726
Weighted mode	8	1.0072	0.00717356	0.917394	-0.123596	0.137943	0.066719	0.883737	1.14791
IL23
MR Egger	8	0.559478	-0.580752	0.0938908	-1.15314	-0.00836835	0.292032	0.315645	0.991667
Weighted median	8	0.930631	-0.0718923	0.178973	-0.176741	0.0329566	0.0534943	0.837997	1.03351
Inverse variance weighted	8	0.969861	-0.0306028	0.468255	-0.113299	0.0520937	0.0421921	0.892883	1.05347
Simple mode	8	0.905546	-0.0992173	0.287016	-0.267977	0.0695419	0.0861017	0.764926	1.07202
Weighted mode	8	0.915499	-0.088286	0.267165	-0.231826	0.0552536	0.0732345	0.793084	1.05681
IL13
MR Egger	8	1.00855	0.00851821	0.977676	-0.563865	0.580902	0.292032	0.569005	1.78765
Weighted median	8	0.93978	-0.0621096	0.226657	-0.162799	0.0385796	0.051372	0.849762	1.03933
Inverse variance weighted	8	0.95784	-0.0430746	0.28975	-0.122822	0.0366728	0.0406874	0.884421	1.03735
Simple mode	8	0.935448	-0.0667299	0.433408	-0.224122	0.0906623	0.0803021	0.799218	1.0949
Weighted mode	8	0.93445	-0.0677966	0.356653	-0.202467	0.0668741	0.0687095	0.816713	1.06916
IL16
MR Egger	8	1.31031	0.270263	0.456103	-0.394809	0.935336	0.339323	0.673809	2.54807
Weighted median	8	0.914668	-0.0891946	0.113112	-0.199537	0.0211474	0.056297	0.81911	1.02137
Inverse variance weighted	8	0.912486	-0.0915829	0.0554163	-0.185289	0.00212284	0.0478091	0.830864	1.00213
Simple mode	8	0.896735	-0.108995	0.263741	-0.284817	0.066827	0.089705	0.752152	1.06911
Weighted mode	8	0.900814	-0.104457	0.274322	-0.277087	0.0681734	0.0880765	0.757989	1.07055
IL18BP
MR Egger	8	0.591591	-0.52494	0.127009	-1.10601	0.0561343	0.296466	0.330875	1.05774
Weighted median	8	0.980274	-0.0199236	0.733629	-0.134676	0.0948284	0.058547	0.873999	1.09947
Inverse variance weighted	8	0.995775	-0.00423421	0.928535	-0.096767	0.0882986	0.0472106	0.907767	1.09231
Simple mode	8	0.967319	-0.0332267	0.72401	-0.210371	0.143918	0.0903798	0.810283	1.15479
Weighted mode	8	0.947659	-0.0537609	0.546966	-0.220275	0.112753	0.084956	0.802298	1.11936
IL18R1
MR Egger	8	0.904944	-0.0998825	0.809217	-0.875771	0.676006	0.395861	0.416541	1.96601
Weighted median	8	1.00348	0.00347779	0.951474	-0.108531	0.115487	0.0571475	0.897151	1.12242
Inverse variance weighted	8	1.01247	0.0123901	0.809539	-0.0883667	0.113147	0.0514065	0.915425	1.1198
Simple mode	8	0.966079	-0.0345101	0.680706	-0.19212	0.1231	0.0804132	0.825208	1.131
Weighted mode	8	0.968024	-0.0324986	0.677675	-0.179425	0.114428	0.0749625	0.835751	1.12123
IL19
MR Egger	8	1.27487	0.242841	0.509911	-0.436727	0.92241	0.346719	0.646148	2.51535
Weighted median	8	1.04352	0.0425967	0.433354	-0.0639677	0.149161	0.0543696	0.938035	1.16086
Inverse variance weighted	8	1.05339	0.0520112	0.256741	-0.0378747	0.141897	0.0458601	0.962834	1.15246
Simple mode	8	0.95533	-0.0456987	0.645233	-0.23194	0.140543	0.095021	0.792994	1.1509
Weighted mode	8	0.975463	-0.0248427	0.785206	-0.196769	0.147083	0.0877174	0.821381	1.15845
IL1A
MR Egger	8	1.26683	0.23652	0.521575	-0.444726	0.917767	0.347575	0.641	2.50369
Weighted median	8	0.985578	-0.0145269	0.801294	-0.127661	0.0986072	0.0577215	0.880152	1.10363
Inverse variance weighted	8	0.927566	-0.0751912	0.115685	-0.168873	0.0184903	0.0477967	0.844616	1.01866
Simple mode	8	1.01836	0.0181961	0.84489	-0.157468	0.193861	0.0896247	0.854304	1.21393
Weighted mode	8	1.01659	0.0164507	0.83143	-0.129473	0.162374	0.0744508	0.878558	1.1763
IL1B
MR Egger	8	1.78395	0.578832	0.134595	-0.0774442	1.23511	0.334835	0.925479	3.43875
Weighted median	8	1.02654	0.0261917	0.656566	-0.0892578	0.141641	0.0589028	0.91461	1.15216
Inverse variance weighted	8	1.01612	0.0159893	0.760913	-0.0870045	0.118983	0.0525479	0.916673	1.12635
Simple mode	8	0.968047	-0.032475	0.73795	-0.215292	0.150342	0.0932741	0.806306	1.16223
Weighted mode	8	1.1032	0.0982106	0.250203	-0.0553309	0.251752	0.0783375	0.946172	1.28628
IL1R1
MR Egger	8	0.731344	-0.312871	0.395198	-0.982646	0.356904	0.341722	0.374319	1.4289
Weighted median	8	0.957553	-0.0433742	0.449085	-0.155686	0.0689377	0.057302	0.855828	1.07137
Inverse variance weighted	8	0.999068	-0.000932318	0.984206	-0.0932421	0.0913774	0.0470968	0.910973	1.09568
Simple mode	8	0.910591	-0.0936614	0.341794	-0.273684	0.0863612	0.0918483	0.760572	1.0902
Weighted mode	8	0.923811	-0.0792474	0.347272	-0.233425	0.0749306	0.0786622	0.791817	1.07781
IL1R2
MR Egger	8	0.942036	-0.0597113	0.844747	-0.632095	0.512672	0.292032	0.531477	1.66975
Weighted median	8	0.980518	-0.0196743	0.710742	-0.123653	0.0843047	0.0530505	0.883686	1.08796
Inverse variance weighted	8	0.993384	-0.00663826	0.870398	-0.0863856	0.0731091	0.0406874	0.91724	1.07585
Simple mode	8	0.95337	-0.0477519	0.576407	-0.207525	0.112021	0.081517	0.812593	1.11854
Weighted mode	8	0.955613	-0.0454022	0.567443	-0.193727	0.102923	0.0756761	0.823882	1.10841
IL1RAP
MR Egger	8	0.861586	-0.148981	0.634087	-0.731592	0.433631	0.297251	0.481142	1.54285
Weighted median	8	0.992989	-0.00703545	0.896229	-0.112762	0.0986908	0.053942	0.893364	1.10373
Inverse variance weighted	8	1.00146	0.00145458	0.971471	-0.0782642	0.0811733	0.0406728	0.92472	1.08456
Simple mode	8	0.978913	-0.0213126	0.786751	-0.169909	0.127284	0.0758147	0.843741	1.13574
Weighted mode	8	0.983554	-0.016583	0.834216	-0.166198	0.133032	0.0763342	0.846879	1.14229
IL1RAPL2
MR Egger	8	1.13034	0.122521	0.689424	-0.449862	0.694905	0.292032	0.637716	2.00352
Weighted median	8	0.939237	-0.062687	0.245853	-0.168562	0.0431885	0.0540181	0.844879	1.04413
Inverse variance weighted	8	0.962774	-0.0379365	0.351136	-0.117684	0.0418109	0.0406874	0.888977	1.0427
Simple mode	8	0.89676	-0.108967	0.271763	-0.288004	0.0700693	0.0913453	0.749758	1.07258
Weighted mode	8	0.902469	-0.102621	0.277858	-0.273586	0.0683446	0.0872273	0.760647	1.07073
IL1RL1
MR Egger	8	1.50727	0.410299	0.209629	-0.162084	0.982683	0.292032	0.850369	2.67161
Weighted median	8	1.01689	0.0167468	0.75278	-0.0874634	0.120957	0.0531685	0.916252	1.12858
Inverse variance weighted	8	1.01535	0.0152329	0.708115	-0.0645145	0.0949803	0.0406874	0.937523	1.09964
Simple mode	8	1.01554	0.0154216	0.856538	-0.145729	0.176572	0.0822197	0.864392	1.19312
Weighted mode	8	1.01554	0.0154216	0.834866	-0.124273	0.155116	0.0712727	0.883139	1.16779
IL1RL2
MR Egger	8	1.91311	0.648731	0.0680029	0.0765139	1.22095	0.291947	1.07952	3.3904
Weighted median	8	0.935489	-0.066686	0.257082	-0.182015	0.0486433	0.0588414	0.833589	1.04985
Inverse variance weighted	8	0.941217	-0.0605819	0.253343	-0.164533	0.0433696	0.0530365	0.848289	1.04432
Simple mode	8	0.927016	-0.0757842	0.469722	-0.270155	0.118587	0.0991687	0.763261	1.1259
Weighted mode	8	0.927016	-0.0757842	0.45871	-0.26523	0.113662	0.0966561	0.767029	1.12037
IL1RN
MR Egger	8	1.2029	0.184734	0.550227	-0.387483	0.75695	0.291947	0.678763	2.13177
Weighted median	8	0.977225	-0.0230384	0.654074	-0.123807	0.07773	0.0514125	0.88355	1.08083
Inverse variance weighted	8	0.960912	-0.0398729	0.326922	-0.119592	0.0398459	0.0406728	0.887283	1.04065
Simple mode	8	0.980751	-0.0194371	0.791066	-0.15784	0.118966	0.070614	0.853986	1.12633
Weighted mode	8	0.978336	-0.0219026	0.764689	-0.159836	0.116031	0.0703742	0.852283	1.12303
IL20
MR Egger	8	1.56707	0.449209	0.174808	-0.123008	1.02143	0.291947	0.884257	2.77715
Weighted median	8	0.904221	-0.100681	0.0745769	-0.211354	0.00999113	0.0564656	0.809487	1.01004
Inverse variance weighted	8	0.931662	-0.0707849	0.0817979	-0.150504	0.00893387	0.0406728	0.860275	1.00897
Simple mode	8	0.877378	-0.130818	0.179964	-0.302956	0.0413206	0.0878257	0.738631	1.04219
Weighted mode	8	0.878983	-0.12899	0.193408	-0.304719	0.0467394	0.0896578	0.73733	1.04785
IL21
MR Egger	8	1.14454	0.134998	0.660083	-0.437218	0.707215	0.291947	0.64583	2.02834
Weighted median	8	1.0306	0.0301433	0.566073	-0.0728129	0.133099	0.0525287	0.929775	1.14236
Inverse variance weighted	8	1.07211	0.0696282	0.0869133	-0.0100905	0.149347	0.0406728	0.98996	1.16108
Simple mode	8	1.01386	0.0137612	0.883346	-0.163487	0.19101	0.0904328	0.849177	1.21047
Weighted mode	8	1.00962	0.0095783	0.909746	-0.150164	0.16932	0.0815009	0.860567	1.1845
IL22
MR Egger	8	1.42287	0.352676	0.272491	-0.219541	0.924893	0.291947	0.802888	2.5216
Weighted median	8	0.98249	-0.0176646	0.755642	-0.128917	0.0935874	0.0567612	0.879047	1.09811
Inverse variance weighted	8	0.967241	-0.0333073	0.412839	-0.113026	0.0464115	0.0406728	0.893127	1.04751
Simple mode	8	1.00783	0.00779607	0.932122	-0.165281	0.180873	0.0883047	0.847655	1.19826
Weighted mode	8	1.02165	0.0214176	0.810745	-0.147386	0.190222	0.0861244	0.862961	1.20952
IL2
MR Egger	8	0.806804	-0.214674	0.521454	-0.832812	0.403464	0.315376	0.434825	1.497
Weighted median	8	1.01913	0.0189483	0.745557	-0.0954997	0.133396	0.0583918	0.908919	1.1427
Inverse variance weighted	8	1.00285	0.00284697	0.946327	-0.0800417	0.0857357	0.0422902	0.923078	1.08952
Simple mode	8	1.05696	0.0553954	0.559655	-0.121909	0.2327	0.0904614	0.885229	1.262
Weighted mode	8	1.0325	0.031983	0.694741	-0.121273	0.185239	0.0781918	0.885792	1.20351
IL24
MR Egger	8	1.21978	0.198666	0.662318	-0.649468	1.0468	0.432722	0.522324	2.84852
Weighted median	8	1.05124	0.0499688	0.421705	-0.0719265	0.171864	0.0621915	0.930599	1.18752
Inverse variance weighted	8	1.00437	0.00436513	0.938705	-0.106894	0.115625	0.0567651	0.898621	1.12257
Simple mode	8	1.05822	0.05659	0.626543	-0.161413	0.274593	0.111226	0.850941	1.31599
Weighted mode	8	1.10007	0.0953777	0.426182	-0.125921	0.316677	0.112908	0.881684	1.37256
IL25
MR Egger	8	0.688349	-0.373459	0.300583	-1.01971	0.272793	0.32972	0.360699	1.31363
Weighted median	8	1.02017	0.01997	0.73139	-0.0940523	0.133992	0.0581746	0.910235	1.14338
Inverse variance weighted	8	1.00983	0.00978618	0.835617	-0.0826505	0.102223	0.0471616	0.920673	1.10763
Simple mode	8	1.10331	0.0983132	0.341791	-0.0906487	0.287275	0.0964091	0.913338	1.33279
Weighted mode	8	1.10515	0.0999831	0.321003	-0.0835234	0.28349	0.0936258	0.91987	1.32776
IL27
MR Egger	8	1.11902	0.112454	0.727968	-0.492192	0.7171	0.308493	0.611285	2.04848
Weighted median	8	1.00898	0.00893785	0.872426	-0.100157	0.118033	0.0556607	0.904695	1.12528
Inverse variance weighted	8	0.99993	-7e-05	0.998628	-0.0798174	0.0796774	0.0406874	0.923285	1.08294
Simple mode	8	0.937408	-0.0646368	0.469158	-0.230198	0.100924	0.0844699	0.794376	1.10619
Weighted mode	8	1.03206	0.0315579	0.714659	-0.130881	0.193997	0.082877	0.877322	1.21409
IL27RA
MR Egger	8	0.906037	-0.0986756	0.811345	-0.874049	0.676698	0.395599	0.417259	1.96737
Weighted median	8	1.06967	0.0673474	0.247153	-0.0467128	0.181408	0.058194	0.954361	1.1989
Inverse variance weighted	8	0.997134	-0.00286969	0.955374	-0.103382	0.097643	0.051282	0.901782	1.10257
Simple mode	8	1.08245	0.0792257	0.346093	-0.074508	0.232959	0.0784356	0.9282	1.26233
Weighted mode	8	1.08594	0.0824452	0.318409	-0.0680016	0.232892	0.0767585	0.934259	1.26225
IL2RA
MR Egger	8	1.54128	0.43261	0.24175	-0.220328	1.08555	0.333132	0.802255	2.96106
Weighted median	8	1.06069	0.0589157	0.28306	-0.0486557	0.166487	0.0548833	0.952509	1.18115
Inverse variance weighted	8	1.04978	0.0485777	0.307236	-0.0446727	0.141828	0.0475767	0.95631	1.15238
Simple mode	8	1.01039	0.0103401	0.914279	-0.171272	0.191952	0.0926592	0.842592	1.21161
Weighted mode	8	1.04453	0.0435691	0.62333	-0.122694	0.209832	0.0848281	0.884534	1.23347
IL2RB
MR Egger	8	0.662073	-0.412379	0.287621	-1.10519	0.28043	0.353474	0.331148	1.3237
Weighted median	8	0.970258	-0.0301929	0.596583	-0.141993	0.0816071	0.0570408	0.867627	1.08503
Inverse variance weighted	8	0.957182	-0.0437614	0.377909	-0.141036	0.0535132	0.0496299	0.868458	1.05497
Simple mode	8	1.00396	0.00395065	0.967786	-0.181066	0.188967	0.0943962	0.83438	1.208
Weighted mode	8	0.988109	-0.0119622	0.884555	-0.167667	0.143743	0.0794412	0.845635	1.15459
IL31
MR Egger	8	0.882153	-0.12539	0.682643	-0.697774	0.446993	0.292032	0.497692	1.5636
Weighted median	8	0.97178	-0.0286254	0.57238	-0.128007	0.070756	0.0507048	0.879847	1.07332
Inverse variance weighted	8	0.98983	-0.0102224	0.801626	-0.0899698	0.0695249	0.0406874	0.913959	1.072
Simple mode	8	0.968245	-0.0322701	0.65584	-0.1682	0.10366	0.0693521	0.845185	1.10922
Weighted mode	8	0.965934	-0.0346594	0.642132	-0.174575	0.105256	0.0713855	0.839814	1.111
IL32
MR Egger	8	1.32136	0.278664	0.376817	-0.29372	0.851047	0.292032	0.745485	2.3421
Weighted median	8	1.04994	0.0487325	0.351293	-0.0537429	0.151208	0.0522834	0.947676	1.16324
Inverse variance weighted	8	1.04395	0.0430133	0.290437	-0.0367341	0.122761	0.0406874	0.963932	1.13061
Simple mode	8	1.09234	0.0883252	0.317753	-0.0726166	0.249267	0.0821132	0.929957	1.28308
Weighted mode	8	1.00869	0.00864969	0.924368	-0.16363	0.180929	0.0878976	0.849056	1.19833
IL34
MR Egger	8	0.894326	-0.111685	0.739198	-0.739384	0.516014	0.320255	0.477408	1.67534
Weighted median	8	1.00196	0.00195851	0.970972	-0.10353	0.107447	0.0538207	0.901649	1.11343
Inverse variance weighted	8	1.00694	0.00691771	0.868509	-0.0749819	0.0888173	0.0417855	0.92776	1.09288
Simple mode	8	0.972506	-0.0278795	0.731314	-0.180766	0.125007	0.0780031	0.834631	1.13316
Weighted mode	8	0.978774	-0.0214549	0.767955	-0.158541	0.115631	0.0699417	0.853388	1.12258
IL3
MR Egger	8	1.92388	0.654344	0.186938	-0.206699	1.51539	0.439307	0.813265	4.55118
Weighted median	8	1.00379	0.00378682	0.955647	-0.129666	0.137239	0.068088	0.878389	1.1471
Inverse variance weighted	8	0.992215	-0.00781533	0.90674	-0.138569	0.122939	0.0667112	0.870603	1.13082
Simple mode	8	1.09924	0.094621	0.481163	-0.154687	0.343929	0.127198	0.856683	1.41048
Weighted mode	8	1.11193	0.106096	0.375934	-0.113861	0.326053	0.112223	0.892382	1.38549
IL36 alpha
MR Egger	8	0.48044	-0.733052	0.0467548	-1.30859	-0.157513	0.293643	0.2702	0.854266
Weighted median	8	0.950164	-0.0511204	0.385785	-0.166648	0.0644076	0.0589429	0.846497	1.06653
Inverse variance weighted	8	0.9989	-0.00110064	0.983831	-0.107544	0.105343	0.0543079	0.898037	1.11109
Simple mode	8	0.934476	-0.0677692	0.563932	-0.287125	0.151586	0.111916	0.750418	1.16368
Weighted mode	8	0.923067	-0.0800531	0.379819	-0.247457	0.087351	0.0854102	0.780784	1.09128
IL36 beta
MR Egger	8	0.891426	-0.114933	0.70751	-0.687316	0.457451	0.292032	0.502924	1.58004
Weighted median	8	1.03078	0.0303148	0.555086	-0.0703655	0.130995	0.0513675	0.932053	1.13996
Inverse variance weighted	8	1.03598	0.0353503	0.384942	-0.0443971	0.115098	0.0406874	0.956574	1.12198
Simple mode	8	0.984018	-0.0161114	0.850274	-0.177329	0.145106	0.082254	0.837504	1.15616
Weighted mode	8	1.00677	0.00674531	0.930625	-0.139763	0.153254	0.0747494	0.869564	1.16562
IL36 gamma
MR Egger	8	0.590815	-0.526252	0.24645	-1.32948	0.27698	0.409812	0.264614	1.31914
Weighted median	8	1.01321	0.0131233	0.825203	-0.10334	0.129586	0.05942	0.901821	1.13836
Inverse variance weighted	8	1.0129	0.0128141	0.831256	-0.105049	0.130677	0.0601344	0.90028	1.1396
Simple mode	8	0.994253	-0.0057631	0.956091	-0.203719	0.192193	0.100998	0.815692	1.2119
Weighted mode	8	0.987311	-0.0127697	0.878493	-0.17062	0.14508	0.0805358	0.843142	1.15613
IL37
MR Egger	8	0.807586	-0.213706	0.496136	-0.792	0.364588	0.295048	0.452938	1.43992
Weighted median	8	0.996243	-0.00376392	0.945109	-0.110913	0.103385	0.054668	0.895017	1.10892
Inverse variance weighted	8	1.02397	0.0236847	0.56035	-0.0560341	0.103403	0.0406728	0.945507	1.10894
Simple mode	8	0.973967	-0.026378	0.766073	-0.193514	0.140758	0.0852736	0.824058	1.15115
Weighted mode	8	0.966941	-0.0336176	0.671391	-0.18248	0.115245	0.0759503	0.833201	1.12215
IL3RA
MR Egger	8	0.64946	-0.431614	0.189892	-1.004	0.140769	0.292032	0.366412	1.15116
Weighted median	8	0.960443	-0.0403612	0.447017	-0.144396	0.0636737	0.053079	0.865545	1.06574
Inverse variance weighted	8	0.98433	-0.0157946	0.697873	-0.095542	0.0639528	0.0406874	0.90888	1.06604
Simple mode	8	0.949552	-0.051765	0.565322	-0.219932	0.116402	0.0857997	0.802573	1.12345
Weighted mode	8	0.944918	-0.0566569	0.505187	-0.214784	0.10147	0.0806771	0.806716	1.1068
IL4
MR Egger	8	1.48161	0.393128	0.226755	-0.179088	0.965345	0.291947	0.836032	2.62569
Weighted median	8	0.976456	-0.0238258	0.682662	-0.13805	0.0903982	0.0582775	0.871055	1.09461
Inverse variance weighted	8	0.970886	-0.0295466	0.467566	-0.109265	0.0501722	0.0406728	0.896493	1.05145
Simple mode	8	0.990525	-0.00952039	0.92316	-0.19615	0.177109	0.095219	0.821889	1.19376
Weighted mode	8	0.995804	-0.00420456	0.966698	-0.194675	0.186266	0.0971786	0.823102	1.20474
IL4RA
MR Egger	8	0.885553	-0.121543	0.691742	-0.693927	0.45084	0.292032	0.49961	1.56963
Weighted median	8	1.00135	0.00135245	0.978499	-0.0970065	0.0997114	0.0501831	0.90755	1.10485
Inverse variance weighted	8	1.01088	0.0108217	0.790261	-0.0689257	0.0905691	0.0406874	0.933396	1.0948
Simple mode	8	0.98742	-0.0126594	0.869222	-0.157942	0.132623	0.0741236	0.8539	1.14182
Weighted mode	8	0.991393	-0.00864412	0.906369	-0.147578	0.13029	0.0708846	0.862795	1.13916
IL5
MR Egger	8	0.971997	-0.0284026	0.925689	-0.600786	0.543981	0.292032	0.54838	1.72285
Weighted median	8	1.07059	0.0682141	0.187169	-0.0331502	0.169578	0.0517165	0.967393	1.18481
Inverse variance weighted	8	1.05699	0.0554229	0.173146	-0.0243245	0.13517	0.0406874	0.975969	1.14473
Simple mode	8	1.07426	0.0716291	0.342628	-0.0663007	0.209559	0.0703724	0.935849	1.23313
Weighted mode	8	1.07872	0.0757796	0.312483	-0.06069	0.212249	0.0696274	0.941115	1.23646
IL5RA
MR Egger	8	1.81215	0.594516	0.301204	-0.435716	1.62475	0.525629	0.646802	5.07714
Weighted median	8	1.07138	0.0689477	0.287489	-0.0581034	0.195999	0.064822	0.943552	1.21653
Inverse variance weighted	8	1.06974	0.0674161	0.358119	-0.0763727	0.211205	0.0733616	0.926471	1.23517
Simple mode	8	1.14308	0.133727	0.306439	-0.103871	0.371326	0.121224	0.901341	1.44965
Weighted mode	8	1.0505	0.0492636	0.678806	-0.174299	0.272827	0.114063	0.840045	1.31367
IL6
MR Egger	8	1.13838	0.129609	0.672733	-0.442775	0.701992	0.292032	0.642252	2.01777
Weighted median	8	0.912534	-0.0915296	0.0880477	-0.1967	0.0136406	0.0536583	0.821437	1.01373
Inverse variance weighted	8	0.954453	-0.0466167	0.251909	-0.126364	0.0331307	0.0406874	0.881294	1.03369
Simple mode	8	0.891746	-0.114573	0.219559	-0.281128	0.0519809	0.0849767	0.754932	1.05336
Weighted mode	8	0.892421	-0.113817	0.25982	-0.295769	0.0681344	0.0928326	0.743959	1.07051
IL6RA
MR Egger	8	0.711266	-0.340708	0.287608	-0.913092	0.231675	0.292032	0.401282	1.26071
Weighted median	8	0.95466	-0.0464	0.387816	-0.15171	0.0589098	0.0537295	0.859238	1.06068
Inverse variance weighted	8	0.976281	-0.0240049	0.555202	-0.103752	0.0557425	0.0406874	0.901449	1.05733
Simple mode	8	0.925894	-0.0769951	0.383148	-0.239201	0.0852112	0.0827583	0.787256	1.08895
Weighted mode	8	0.938285	-0.0637011	0.432269	-0.21356	0.0861583	0.0764588	0.807703	1.08998
IL6RB
MR Egger	8	0.738762	-0.302779	0.339666	-0.874996	0.269438	0.291947	0.416864	1.30923
Weighted median	8	0.962607	-0.0381102	0.456228	-0.138364	0.0621431	0.0511497	0.870782	1.06411
Inverse variance weighted	8	0.975791	-0.0245067	0.54682	-0.104225	0.0552121	0.0406728	0.901022	1.05676
Simple mode	8	0.955293	-0.0457369	0.552283	-0.18935	0.0978762	0.073272	0.827497	1.10283
Weighted mode	8	0.946783	-0.0546857	0.503878	-0.206828	0.0974561	0.0776234	0.81316	1.10236
IL7
MR Egger	8	0.849944	-0.162585	0.597846	-0.734968	0.409799	0.292032	0.479521	1.50651
Weighted median	8	0.993093	-0.00693067	0.895984	-0.110836	0.0969745	0.0530128	0.895086	1.10183
Inverse variance weighted	8	0.987209	-0.0128732	0.751704	-0.0926206	0.0668742	0.0406874	0.911539	1.06916
Simple mode	8	0.906628	-0.0980226	0.283233	-0.26333	0.067285	0.0843406	0.768488	1.0696
Weighted mode	8	0.940985	-0.0608285	0.444898	-0.208119	0.0864623	0.0751484	0.81211	1.09031
IL7RA
MR Egger	8	1.98026	0.683227	0.0578788	0.110844	1.25561	0.292032	1.11722	3.50998
Weighted median	8	1.02465	0.0243505	0.665249	-0.0859557	0.134657	0.0562787	0.917635	1.14414
Inverse variance weighted	8	1.00009	9.31e-05	0.998322	-0.0866688	0.086855	0.0442663	0.916981	1.09074
Simple mode	8	1.08993	0.0861148	0.436038	-0.118221	0.29045	0.104253	0.8885	1.33703
Weighted mode	8	1.07521	0.0725117	0.403481	-0.0873437	0.232367	0.0815589	0.916362	1.26158
IL9
MR Egger	8	1.01738	0.0172337	0.954858	-0.55515	0.589617	0.292032	0.573986	1.8033
Weighted median	8	0.993231	-0.00679239	0.89836	-0.111018	0.0974332	0.0531763	0.894923	1.10234
Inverse variance weighted	8	0.983732	-0.0164019	0.686861	-0.0961493	0.0633455	0.0406874	0.908328	1.06539
Simple mode	8	0.985228	-0.0148823	0.859635	-0.173874	0.144109	0.0811182	0.840403	1.15501
Weighted mode	8	0.988716	-0.0113483	0.879669	-0.153012	0.130316	0.0722776	0.858119	1.13919
IL8
MR Egger	8	1.12834	0.120745	0.693637	-0.451638	0.693129	0.292032	0.636584	1.99996
Weighted median	8	0.928829	-0.073831	0.164898	-0.178029	0.030367	0.0531623	0.836918	1.03083
Inverse variance weighted	8	0.975361	-0.0249481	0.539768	-0.104695	0.0547993	0.0406874	0.900599	1.05633
Simple mode	8	0.911788	-0.0923474	0.331815	-0.26596	0.0812647	0.0885776	0.76647	1.08466
Weighted mode	8	0.911788	-0.0923474	0.294318	-0.252027	0.0673323	0.0814693	0.777224	1.06965
ILF3
MR Egger	8	1.28684	0.252189	0.420873	-0.320027	0.824406	0.291947	0.726129	2.28053
Weighted median	8	0.922804	-0.0803379	0.131954	-0.184864	0.0241882	0.0533296	0.831217	1.02448
Inverse variance weighted	8	0.913935	-0.0899962	0.0269194	-0.169715	-0.0102774	0.0406728	0.843905	0.989775
Simple mode	8	0.944734	-0.056852	0.551101	-0.234822	0.121118	0.0908012	0.790711	1.12876
Weighted mode	8	0.966776	-0.0337887	0.693186	-0.194823	0.127246	0.0821605	0.82298	1.1357
TIRAP
MR Egger	8	0.981678	-0.018492	0.951553	-0.590709	0.553725	0.291947	0.553934	1.73972
Weighted median	8	0.951032	-0.0502073	0.344977	-0.15441	0.0539951	0.0531645	0.856921	1.05548
Inverse variance weighted	8	0.971397	-0.0290202	0.475534	-0.108739	0.0506985	0.0406728	0.896965	1.05201
Simple mode	8	0.903784	-0.101165	0.260016	-0.262964	0.0606333	0.0825502	0.76877	1.06251
Weighted mode	8	0.912875	-0.0911565	0.257033	-0.235947	0.0536339	0.0738727	0.789823	1.0551

## Sheet: if_ads
Odds Ratios and Confidence Intervals for Inflammatory Cytokines in Relation to Universal ADs
Autoimmune diseases	inflammatory_factors	inflammatory_factors	nsnp	OR	beta	Pval	lo_ci	up_ci	se	or_lci95	or_uci95
Autoimmune diseases	MCSF	MR Egger	7	1.04895	0.0477859	0.418244	-0.0584268	0.153999	0.0541901	0.943247	1.16649
Autoimmune diseases	MCSF	Weighted median	7	0.994212	-0.00580484	0.859202	-0.0699432	0.0583336	0.0327237	0.932447	1.06007
Autoimmune diseases	MCSF	Inverse variance weighted	7	1.00929	0.00925172	0.720434	-0.0414174	0.0599208	0.0258516	0.959429	1.06175
Autoimmune diseases	MCSF	Simple mode	7	0.95845	-0.0424382	0.450485	-0.145515	0.0606386	0.0525902	0.864577	1.06251
Autoimmune diseases	MCSF	Weighted mode	7	0.986889	-0.0131978	0.73066	-0.0849068	0.0585112	0.0365862	0.918598	1.06026
Autoimmune diseases	GCSF	MR Egger	8	1.04353	0.042612	0.695564	-0.160752	0.245977	0.103757	0.851503	1.27887
Autoimmune diseases	GCSF	Weighted median	8	1.04063	0.0398273	0.310807	-0.037192	0.116847	0.0392956	0.963491	1.12395
Autoimmune diseases	GCSF	Inverse variance weighted	8	1.02015	0.0199457	0.590127	-0.052631	0.0925225	0.037029	0.94873	1.09694
Autoimmune diseases	GCSF	Simple mode	8	1.05988	0.058155	0.267608	-0.0364922	0.152802	0.0482894	0.964166	1.16509
Autoimmune diseases	GCSF	Weighted mode	8	1.04612	0.0450883	0.427052	-0.059734	0.149911	0.0534808	0.942015	1.16173
Autoimmune diseases	GCSFR	MR Egger	8	1.13078	0.122906	0.415686	-0.152693	0.398504	0.140612	0.858393	1.48959
Autoimmune diseases	GCSFR	Weighted median	8	1.03829	0.0375757	0.33141	-0.0382506	0.113402	0.0386869	0.962472	1.12008
Autoimmune diseases	GCSFR	Inverse variance weighted	8	1.05885	0.0571812	0.160429	-0.0128089	0.127171	0.0357092	0.987273	1.13561
Autoimmune diseases	GCSFR	Simple mode	8	1.0157	0.0155818	0.81574	-0.110634	0.141798	0.0643959	0.895266	1.15234
Autoimmune diseases	GCSFR	Weighted mode	8	1.02999	0.0295539	0.58857	-0.0726482	0.131756	0.0521439	0.929928	1.14083
Autoimmune diseases	GM-CSF	MR Egger	9	0.944674	-0.0569159	0.435005	-0.19165	0.0778179	0.0687417	0.825596	1.08093
Autoimmune diseases	GM-CSF	Weighted median	9	1.01873	0.018554	0.554081	-0.0429104	0.0800184	0.0313594	0.957997	1.08331
Autoimmune diseases	GM-CSF	Inverse variance weighted	9	1.01612	0.015994	0.511254	-0.0317285	0.0637165	0.0243482	0.96877	1.06579
Autoimmune diseases	GM-CSF	Simple mode	9	1.0133	0.0132169	0.782612	-0.0775613	0.103995	0.0463154	0.92537	1.1096
Autoimmune diseases	GM-CSF	Weighted mode	9	1.01807	0.01791	0.682783	-0.0648943	0.100714	0.0422471	0.937167	1.10596
Autoimmune diseases	CSF2RA	MR Egger	11	1.02247	0.0222172	0.661431	-0.0739589	0.118393	0.0490694	0.92871	1.12569
Autoimmune diseases	CSF2RA	Weighted median	11	1.00083	0.000825901	0.976675	-0.0545397	0.0561915	0.0282477	0.946921	1.0578
Autoimmune diseases	CSF2RA	Inverse variance weighted	11	1.00941	0.00936131	0.668024	-0.0334221	0.0521448	0.0218283	0.96713	1.05353
Autoimmune diseases	CSF2RA	Simple mode	11	0.979641	-0.0205688	0.668229	-0.111878	0.0707399	0.0465861	0.894154	1.0733
Autoimmune diseases	CSF2RA	Weighted mode	11	0.982046	-0.0181171	0.686194	-0.103476	0.0672415	0.0435503	0.901698	1.06955
Autoimmune diseases	CXCL10	MR Egger	6	1.03905	0.0383086	0.432161	-0.0477447	0.124362	0.0439047	0.953377	1.13243
Autoimmune diseases	CXCL10	Weighted median	6	1.03326	0.0327158	0.301561	-0.0293533	0.094785	0.0316679	0.971073	1.09942
Autoimmune diseases	CXCL10	Inverse variance weighted	6	1.00839	0.00835914	0.73396	-0.0398484	0.0565667	0.0245957	0.960935	1.0582
Autoimmune diseases	CXCL10	Simple mode	6	1.01682	0.0166772	0.727398	-0.0719609	0.105315	0.0452235	0.930567	1.11106
Autoimmune diseases	CXCL10	Weighted mode	6	1.0257	0.025371	0.466717	-0.0377829	0.0885249	0.0322214	0.962922	1.09256
Autoimmune diseases	CXCL11	MR Egger	14	0.832159	-0.183732	0.161009	-0.424779	0.0573153	0.122983	0.653915	1.05899
Autoimmune diseases	CXCL11	Weighted median	14	0.962965	-0.0377379	0.107359	-0.0836746	0.00819878	0.0234371	0.91973	1.00823
Autoimmune diseases	CXCL11	Inverse variance weighted	14	0.974433	-0.025899	0.168145	-0.0605066	0.00870856	0.0176569	0.941288	1.00875
Autoimmune diseases	CXCL11	Simple mode	14	0.93267	-0.0697037	0.0682974	-0.138428	-0.000979904	0.0350632	0.870726	0.999021
Autoimmune diseases	CXCL11	Weighted mode	14	0.997578	-0.00242449	0.925595	-0.052332	0.047483	0.025463	0.949014	1.04863
Autoimmune diseases	CXCL5	MR Egger	12	1.02877	0.0283665	0.487455	-0.048752	0.105485	0.0393462	0.952417	1.11125
Autoimmune diseases	CXCL5	Weighted median	12	1.00208	0.00208183	0.937115	-0.0496369	0.0538006	0.0263871	0.951575	1.05527
Autoimmune diseases	CXCL5	Inverse variance weighted	12	1.00003	3.21e-05	0.998705	-0.0387079	0.038772	0.0197653	0.962032	1.03953
Autoimmune diseases	CXCL5	Simple mode	12	1.00145	0.00144683	0.969028	-0.0699478	0.0728415	0.0364258	0.932442	1.07556
Autoimmune diseases	CXCL5	Weighted mode	12	1.00482	0.00481005	0.874031	-0.0532866	0.0629067	0.0296411	0.948108	1.06493
Autoimmune diseases	CXCL13	MR Egger	16	1.08941	0.0856377	0.168332	-0.0299003	0.201176	0.0589479	0.970542	1.22284
Autoimmune diseases	CXCL13	Weighted median	16	0.969257	-0.0312252	0.30553	-0.0909545	0.0285041	0.0304741	0.913059	1.02891
Autoimmune diseases	CXCL13	Inverse variance weighted	16	0.991185	-0.00885422	0.686653	-0.0509869	0.0332785	0.0214963	0.950291	1.03384
Autoimmune diseases	CXCL13	Simple mode	16	0.937187	-0.0648729	0.301456	-0.183685	0.0539394	0.0606185	0.832198	1.05542
Autoimmune diseases	CXCL13	Weighted mode	16	0.939448	-0.0624628	0.286983	-0.173355	0.0484299	0.0565779	0.840839	1.04962
Autoimmune diseases	CXCL14	MR Egger	11	1.0181	0.0179414	0.804539	-0.120022	0.155905	0.0703895	0.886901	1.16871
Autoimmune diseases	CXCL14	Weighted median	11	1.03043	0.0299724	0.32377	-0.0295629	0.0895078	0.0303752	0.97087	1.09364
Autoimmune diseases	CXCL14	Inverse variance weighted	11	1.01107	0.0110054	0.652658	-0.0353371	0.057348	0.0236441	0.96528	1.05902
Autoimmune diseases	CXCL14	Simple mode	11	1.0433	0.0423893	0.343694	-0.0412003	0.125979	0.0426478	0.959637	1.13426
Autoimmune diseases	CXCL14	Weighted mode	11	1.0433	0.0423893	0.277796	-0.0299997	0.114778	0.0369332	0.970446	1.12162
Autoimmune diseases	CXCL9	MR Egger	10	1.00527	0.00525737	0.944181	-0.137377	0.147892	0.0727726	0.871642	1.15939
Autoimmune diseases	CXCL9	Weighted median	10	0.989765	-0.0102879	0.764104	-0.0774806	0.0569048	0.034282	0.925445	1.05856
Autoimmune diseases	CXCL9	Inverse variance weighted	10	0.993548	-0.00647288	0.806902	-0.0583778	0.045432	0.0264821	0.943293	1.04648
Autoimmune diseases	CXCL9	Simple mode	10	1.02047	0.0202676	0.662108	-0.0676585	0.108194	0.0448603	0.93458	1.11426
Autoimmune diseases	CXCL9	Weighted mode	10	1.00074	0.000735915	0.986287	-0.0808907	0.0823626	0.0416463	0.922294	1.08585
Autoimmune diseases	CXCL16	MR Egger	23	1.14544	0.135788	0.436936	-0.200044	0.471619	0.171343	0.818695	1.60259
Autoimmune diseases	CXCL16	Weighted median	23	0.988172	-0.0118986	0.565495	-0.0524784	0.0286813	0.020704	0.948875	1.0291
Autoimmune diseases	CXCL16	Inverse variance weighted	23	0.986473	-0.0136197	0.314594	-0.0394626	0.0122232	0.0131851	0.961306	1.0123
Autoimmune diseases	CXCL16	Simple mode	23	0.986837	-0.0132509	0.670942	-0.0735647	0.047063	0.0307724	0.929076	1.04819
Autoimmune diseases	CXCL16	Weighted mode	23	0.99682	-0.00318488	0.908242	-0.0567257	0.050356	0.0273168	0.944853	1.05165
Autoimmune diseases	CCL1	MR Egger	13	1.08235	0.0791361	0.0201982	0.0219552	0.136317	0.0291739	1.0222	1.14605
Autoimmune diseases	CCL1	Weighted median	13	0.998462	-0.00153969	0.949195	-0.048901	0.0458216	0.0241639	0.952275	1.04689
Autoimmune diseases	CCL1	Inverse variance weighted	13	1.01246	0.0123803	0.482434	-0.0221664	0.046927	0.0176259	0.978077	1.04805
Autoimmune diseases	CCL1	Simple mode	13	0.99702	-0.00298462	0.938906	-0.0777272	0.071758	0.038134	0.925217	1.0744
Autoimmune diseases	CCL1	Weighted mode	13	1.00148	0.00147536	0.962481	-0.0587279	0.0616786	0.030716	0.942963	1.06362
Autoimmune diseases	CCL13	MR Egger	19	1.04929	0.0481098	0.346126	-0.0492011	0.145421	0.0496484	0.95199	1.15653
Autoimmune diseases	CCL13	Weighted median	19	1.01727	0.0171184	0.493174	-0.0318435	0.0660804	0.0249806	0.968658	1.06831
Autoimmune diseases	CCL13	Inverse variance weighted	19	1.00672	0.0066997	0.751033	-0.0346881	0.0480875	0.0211162	0.965907	1.04926
Autoimmune diseases	CCL13	Simple mode	19	1.11022	0.104562	0.0365477	0.0138292	0.195295	0.0462923	1.01393	1.21567
Autoimmune diseases	CCL13	Weighted mode	19	0.998095	-0.00190653	0.967709	-0.0929411	0.089128	0.0464462	0.911247	1.09322
Autoimmune diseases	CCL17	MR Egger	17	0.981034	-0.019148	0.512677	-0.0751142	0.0368181	0.0285542	0.927638	1.0375
Autoimmune diseases	CCL17	Weighted median	17	1.02691	0.0265585	0.2114	-0.0150944	0.0682113	0.0212515	0.985019	1.07059
Autoimmune diseases	CCL17	Inverse variance weighted	17	1.01126	0.0111996	0.440016	-0.0172285	0.0396277	0.0145041	0.982919	1.04042
Autoimmune diseases	CCL17	Simple mode	17	1.02809	0.027704	0.477164	-0.0468891	0.102297	0.0380577	0.954193	1.10771
Autoimmune diseases	CCL17	Weighted mode	17	1.02809	0.027704	0.313495	-0.0244733	0.0798814	0.0266211	0.975824	1.08316
Autoimmune diseases	CCL3	MR Egger	13	1.03184	0.0313478	0.210388	-0.0148436	0.0775393	0.0235671	0.985266	1.08062
Autoimmune diseases	CCL3	Weighted median	13	1.01435	0.0142461	0.370232	-0.0169159	0.045408	0.0158989	0.983226	1.04645
Autoimmune diseases	CCL3	Inverse variance weighted	13	1.00893	0.00889451	0.559104	-0.0209481	0.0387371	0.0152258	0.97927	1.0395
Autoimmune diseases	CCL3	Simple mode	13	1.00949	0.00944378	0.77693	-0.0544314	0.073319	0.0325894	0.947023	1.07607
Autoimmune diseases	CCL3	Weighted mode	13	1.01451	0.0144026	0.393265	-0.0174752	0.0462804	0.0162642	0.982677	1.04737
Autoimmune diseases	CCL20	MR Egger	9	0.821152	-0.197047	0.120213	-0.415369	0.021276	0.111389	0.660097	1.0215
Autoimmune diseases	CCL20	Weighted median	9	0.983673	-0.0164616	0.634278	-0.0842853	0.0513622	0.034604	0.919169	1.0527
Autoimmune diseases	CCL20	Inverse variance weighted	9	1.01262	0.0125365	0.68283	-0.0475986	0.0726716	0.0306812	0.953516	1.07538
Autoimmune diseases	CCL20	Simple mode	9	0.981452	-0.018722	0.691912	-0.10802	0.0705761	0.0455603	0.89761	1.07313
Autoimmune diseases	CCL20	Weighted mode	9	0.977744	-0.0225073	0.621721	-0.108477	0.0634623	0.043862	0.8972	1.06552
Autoimmune diseases	CCL22	MR Egger	3	0.842982	-0.17081	0.40555	-0.418534	0.0769153	0.12639	0.658011	1.07995
Autoimmune diseases	CCL22	Weighted median	3	0.924014	-0.0790279	0.0292108	-0.15006	-0.00799583	0.0362409	0.860656	0.992036
Autoimmune diseases	CCL22	Inverse variance weighted	3	0.935495	-0.0666791	0.0404874	-0.13047	-0.00288822	0.0325463	0.877683	0.997116
Autoimmune diseases	CCL22	Simple mode	3	0.89515	-0.110764	0.169873	-0.213873	-0.00765482	0.0526066	0.807451	0.992374
Autoimmune diseases	CCL22	Weighted mode	3	0.980693	-0.0194957	0.693872	-0.103521	0.0645294	0.0428699	0.901657	1.06666
Autoimmune diseases	CCL5	MR Egger	16	0.881842	-0.125742	0.00734732	-0.204427	-0.0470574	0.0401452	0.815115	0.954033
Autoimmune diseases	CCL5	Weighted median	16	0.964953	-0.0356761	0.123087	-0.0810248	0.00967252	0.0231371	0.922171	1.00972
Autoimmune diseases	CCL5	Inverse variance weighted	16	0.970101	-0.0303549	0.0753241	-0.0638079	0.00309806	0.0170679	0.938185	1.0031
Autoimmune diseases	CCL5	Simple mode	16	0.962853	-0.0378545	0.329464	-0.111464	0.0357555	0.0375561	0.894523	1.0364
Autoimmune diseases	CCL5	Weighted mode	16	0.955909	-0.0450922	0.161621	-0.105123	0.0149385	0.0306279	0.900214	1.01505
Autoimmune diseases	CCL7	MR Egger	17	0.988357	-0.0117116	0.642531	-0.0601694	0.0367462	0.0247234	0.941605	1.03743
Autoimmune diseases	CCL7	Weighted median	17	1.00299	0.00298557	0.87098	-0.0330441	0.0390152	0.0183825	0.967496	1.03979
Autoimmune diseases	CCL7	Inverse variance weighted	17	0.993826	-0.00619332	0.659933	-0.0337814	0.0213948	0.0140756	0.966783	1.02163
Autoimmune diseases	CCL7	Simple mode	17	1.00725	0.0072201	0.843289	-0.0632109	0.0776511	0.0359342	0.938746	1.08075
Autoimmune diseases	CCL7	Weighted mode	17	1.00372	0.00371344	0.854598	-0.0353673	0.0427942	0.0199391	0.965251	1.04372
Autoimmune diseases	CCL8	MR Egger	15	1.08994	0.0861202	0.244564	-0.0523696	0.22461	0.0706581	0.948978	1.25183
Autoimmune diseases	CCL8	Weighted median	15	1.00485	0.00484057	0.85766	-0.048058	0.0577391	0.0269891	0.953079	1.05944
Autoimmune diseases	CCL8	Inverse variance weighted	15	1.00906	0.00901897	0.706012	-0.0378431	0.055881	0.0239092	0.962864	1.05747
Autoimmune diseases	CCL8	Simple mode	15	0.991482	-0.0085542	0.863032	-0.10397	0.0868618	0.0486817	0.901252	1.09075
Autoimmune diseases	CCL8	Weighted mode	15	1.00069	0.000689742	0.987602	-0.08477	0.0861494	0.0436019	0.918724	1.08997
Autoimmune diseases	TGFA	MR Egger	9	1.03684	0.036174	0.728326	-0.159907	0.232255	0.100041	0.852223	1.26144
Autoimmune diseases	TGFA	Weighted median	9	0.954064	-0.0470243	0.19429	-0.118032	0.0239835	0.0362285	0.888667	1.02427
Autoimmune diseases	TGFA	Inverse variance weighted	9	0.936915	-0.065163	0.0167742	-0.118566	-0.0117601	0.0272464	0.888193	0.988309
Autoimmune diseases	TGFA	Simple mode	9	0.915571	-0.0882078	0.137741	-0.193046	0.0166307	0.053489	0.824444	1.01677
Autoimmune diseases	TGFA	Weighted mode	9	0.960342	-0.0404658	0.367188	-0.123451	0.0425199	0.0423396	0.883865	1.04344
Autoimmune diseases	TGFB1	MR Egger	10	0.94925	-0.0520833	0.354173	-0.155881	0.051714	0.0529578	0.855661	1.05307
Autoimmune diseases	TGFB1	Weighted median	10	1.04183	0.0409806	0.279909	-0.0333555	0.115317	0.0379265	0.967195	1.12223
Autoimmune diseases	TGFB1	Inverse variance weighted	10	1.02332	0.0230559	0.371617	-0.027523	0.0736349	0.0258056	0.972852	1.07641
Autoimmune diseases	TGFB1	Simple mode	10	1.06107	0.0592799	0.372716	-0.064584	0.183144	0.0631959	0.937457	1.20099
Autoimmune diseases	TGFB1	Weighted mode	10	1.05641	0.0548753	0.406711	-0.0686985	0.178449	0.0630479	0.933608	1.19536
Autoimmune diseases	TGFB2	MR Egger	14	0.978763	-0.0214653	0.623145	-0.104883	0.0619521	0.0425599	0.90043	1.06391
Autoimmune diseases	TGFB2	Weighted median	14	0.997676	-0.00232688	0.930212	-0.0544025	0.0497487	0.0265692	0.947051	1.05101
Autoimmune diseases	TGFB2	Inverse variance weighted	14	1.00372	0.00370818	0.838756	-0.0320096	0.0394259	0.0182233	0.968497	1.04021
Autoimmune diseases	TGFB2	Simple mode	14	0.980394	-0.0198003	0.646243	-0.102397	0.0627968	0.0421414	0.902671	1.06481
Autoimmune diseases	TGFB2	Weighted mode	14	0.995564	-0.00444537	0.898526	-0.0714479	0.0625571	0.034185	0.931045	1.06456
Autoimmune diseases	TGFB3	MR Egger	13	1.01551	0.0153907	0.782796	-0.0913864	0.122168	0.0544781	0.912665	1.12994
Autoimmune diseases	TGFB3	Weighted median	13	0.971909	-0.0284927	0.280494	-0.0802394	0.0232541	0.0264014	0.922895	1.02353
Autoimmune diseases	TGFB3	Inverse variance weighted	13	0.991781	-0.00825294	0.689754	-0.0487746	0.0322687	0.0206743	0.952396	1.03279
Autoimmune diseases	TGFB3	Simple mode	13	0.973435	-0.0269239	0.51473	-0.105531	0.0516832	0.0401057	0.899847	1.05304
Autoimmune diseases	TGFB3	Weighted mode	13	0.975091	-0.0252245	0.506931	-0.0974985	0.0470495	0.0368745	0.907104	1.04817
Autoimmune diseases	IL10	MR Egger	8	0.930392	-0.0721496	0.247256	-0.182485	0.0381856	0.0562935	0.833197	1.03892
Autoimmune diseases	IL10	Weighted median	8	0.977158	-0.023107	0.499753	-0.090215	0.044001	0.0342388	0.913735	1.04498
Autoimmune diseases	IL10	Inverse variance weighted	8	0.972156	-0.0282391	0.272941	-0.0787251	0.0222469	0.0257582	0.924294	1.0225
Autoimmune diseases	IL10	Simple mode	8	0.982552	-0.0176016	0.753414	-0.123186	0.087983	0.0538697	0.884099	1.09197
Autoimmune diseases	IL10	Weighted mode	8	0.980444	-0.0197494	0.722374	-0.124388	0.0848892	0.053387	0.883037	1.0886
Autoimmune diseases	IL10RB	MR Egger	14	0.999052	-0.000948256	0.98089	-0.0769424	0.0750459	0.0387725	0.925943	1.07793
Autoimmune diseases	IL10RB	Weighted median	14	0.993998	-0.00602011	0.804404	-0.0536652	0.041625	0.0243087	0.947749	1.0425
Autoimmune diseases	IL10RB	Inverse variance weighted	14	0.985894	-0.0142065	0.427543	-0.0493017	0.0208888	0.0179057	0.951894	1.02111
Autoimmune diseases	IL10RB	Simple mode	14	1.007	0.00697801	0.852354	-0.0650602	0.0790163	0.0367542	0.937011	1.08222
Autoimmune diseases	IL10RB	Weighted mode	14	1.0013	0.00130347	0.96493	-0.0556946	0.0583016	0.0290807	0.945828	1.06003
Autoimmune diseases	IL11	MR Egger	13	0.899131	-0.106326	0.0291925	-0.189486	-0.0231666	0.0424285	0.827384	0.9771
Autoimmune diseases	IL11	Weighted median	13	0.975075	-0.0252405	0.376793	-0.0812151	0.030734	0.0285584	0.921995	1.03121
Autoimmune diseases	IL11	Inverse variance weighted	13	0.971489	-0.0289256	0.223872	-0.0755377	0.0176865	0.0237817	0.927245	1.01784
Autoimmune diseases	IL11	Simple mode	13	0.988475	-0.0115924	0.780786	-0.0914216	0.0682368	0.0407292	0.912633	1.07062
Autoimmune diseases	IL11	Weighted mode	13	0.987076	-0.0130086	0.714434	-0.0810577	0.0550405	0.0347189	0.92214	1.05658
Autoimmune diseases	IL11RA	MR Egger	10	0.97247	-0.0279161	0.42282	-0.0926913	0.0368591	0.0330486	0.911475	1.03755
Autoimmune diseases	IL11RA	Weighted median	10	1.0009	0.000902212	0.967477	-0.042468	0.0442724	0.0221276	0.958421	1.04527
Autoimmune diseases	IL11RA	Inverse variance weighted	10	1.01612	0.0159958	0.366288	-0.0187065	0.0506982	0.0177053	0.981467	1.05201
Autoimmune diseases	IL11RA	Simple mode	10	1.00467	0.00465634	0.898604	-0.0649746	0.0742873	0.035526	0.937091	1.07712
Autoimmune diseases	IL11RA	Weighted mode	10	0.99694	-0.0030642	0.909012	-0.0541594	0.048031	0.026069	0.947281	1.0492
Autoimmune diseases	IL12	MR Egger	17	0.970994	-0.0294351	0.549373	-0.123625	0.0647553	0.0480563	0.883711	1.0669
Autoimmune diseases	IL12	Weighted median	17	1.03367	0.0331176	0.171269	-0.0143268	0.0805621	0.0242063	0.985775	1.0839
Autoimmune diseases	IL12	Inverse variance weighted	17	1.00834	0.00830503	0.634109	-0.0258956	0.0425057	0.0174493	0.974437	1.04342
Autoimmune diseases	IL12	Simple mode	17	1.05465	0.0532105	0.281155	-0.0402925	0.146713	0.0477056	0.960508	1.15802
Autoimmune diseases	IL12	Weighted mode	17	1.05365	0.0522638	0.281006	-0.0395462	0.144074	0.0468418	0.961226	1.15497
Autoimmune diseases	IL23	MR Egger	16	0.97024	-0.0302123	0.711998	-0.187382	0.126958	0.0801888	0.829127	1.13537
Autoimmune diseases	IL23	Weighted median	16	0.976083	-0.0242074	0.298469	-0.0698411	0.0214264	0.0232825	0.932542	1.02166
Autoimmune diseases	IL23	Inverse variance weighted	16	0.987755	-0.0123207	0.395489	-0.0398681	0.0152268	0.0140548	0.960916	1.01534
Autoimmune diseases	IL23	Simple mode	16	0.958642	-0.0422372	0.219677	-0.106867	0.0223927	0.0329744	0.898645	1.02265
Autoimmune diseases	IL23	Weighted mode	16	0.997655	-0.00234787	0.928312	-0.052645	0.0479492	0.0256618	0.948717	1.04912
Autoimmune diseases	IL13	MR Egger	13	1.03506	0.034463	0.597073	-0.089629	0.158555	0.0633122	0.91427	1.17182
Autoimmune diseases	IL13	Weighted median	13	1.02273	0.0224754	0.49942	-0.0427476	0.0876985	0.0332771	0.958153	1.09166
Autoimmune diseases	IL13	Inverse variance weighted	13	1.01161	0.0115434	0.646902	-0.0378488	0.0609357	0.0252001	0.962858	1.06283
Autoimmune diseases	IL13	Simple mode	13	1.06541	0.0633633	0.350676	-0.0645274	0.191254	0.0652504	0.93751	1.21077
Autoimmune diseases	IL13	Weighted mode	13	1.06184	0.0599992	0.344762	-0.0595685	0.179567	0.0610039	0.942171	1.1967
Autoimmune diseases	IL16	MR Egger	19	1.01517	0.0150595	0.517037	-0.0295482	0.0596671	0.022759	0.970884	1.06148
Autoimmune diseases	IL16	Weighted median	19	1.0098	0.00974799	0.585633	-0.0252977	0.0447937	0.0178805	0.97502	1.04581
Autoimmune diseases	IL16	Inverse variance weighted	19	0.984834	-0.0152825	0.246413	-0.0411246	0.0105596	0.0131847	0.95971	1.01062
Autoimmune diseases	IL16	Simple mode	19	1.00007	7.01e-05	0.998443	-0.0693977	0.069538	0.0354428	0.932956	1.07201
Autoimmune diseases	IL16	Weighted mode	19	1.0041	0.0040899	0.837704	-0.0344831	0.0426629	0.0196801	0.966105	1.04359
Autoimmune diseases	IL18BP	MR Egger	12	0.986932	-0.0131539	0.857828	-0.153408	0.1271	0.0715582	0.85778	1.13553
Autoimmune diseases	IL18BP	Weighted median	12	1.03208	0.0315797	0.336253	-0.0327885	0.0959479	0.0328409	0.967743	1.1007
Autoimmune diseases	IL18BP	Inverse variance weighted	12	1.04434	0.0433823	0.0989687	-0.00815455	0.0949192	0.0262943	0.991879	1.09957
Autoimmune diseases	IL18BP	Simple mode	12	1.03188	0.0313821	0.53624	-0.0649574	0.127722	0.0491528	0.937107	1.13624
Autoimmune diseases	IL18BP	Weighted mode	12	1.03354	0.0329894	0.474578	-0.0543435	0.120322	0.0445576	0.947107	1.12786
Autoimmune diseases	IL18R1	MR Egger	14	0.995993	-0.00401461	0.847319	-0.0440084	0.0359792	0.020405	0.956946	1.03663
Autoimmune diseases	IL18R1	Weighted median	14	1.01364	0.0135511	0.379479	-0.0166701	0.0437722	0.015419	0.983468	1.04474
Autoimmune diseases	IL18R1	Inverse variance weighted	14	1.01919	0.0190062	0.164905	-0.00781779	0.0458301	0.0136857	0.992213	1.0469
Autoimmune diseases	IL18R1	Simple mode	14	1.07724	0.0744055	0.0582927	0.00415783	0.144653	0.0358407	1.00417	1.15564
Autoimmune diseases	IL18R1	Weighted mode	14	1.0135	0.0134091	0.378382	-0.0154095	0.0422277	0.0147034	0.984709	1.04313
Autoimmune diseases	IL19	MR Egger	15	1.00248	0.00248016	0.925267	-0.0483481	0.0533085	0.0259328	0.952802	1.05475
Autoimmune diseases	IL19	Weighted median	15	0.990891	-0.00915113	0.390557	-0.030041	0.0117387	0.0106581	0.970406	1.01181
Autoimmune diseases	IL19	Inverse variance weighted	15	0.996151	-0.00385631	0.78427	-0.0309002	0.0231876	0.0137979	0.969572	1.02346
Autoimmune diseases	IL19	Simple mode	15	1.02656	0.026209	0.521075	-0.0518344	0.104252	0.0398181	0.949486	1.10988
Autoimmune diseases	IL19	Weighted mode	15	0.990725	-0.00931814	0.403866	-0.0305358	0.0118995	0.0108253	0.969926	1.01197
Autoimmune diseases	IL1A	MR Egger	15	1.07483	0.0721585	0.14286	-0.0185256	0.162843	0.0462674	0.981645	1.17685
Autoimmune diseases	IL1A	Weighted median	15	1.05361	0.0522212	0.0590974	-0.00200676	0.106449	0.0276673	0.997995	1.11232
Autoimmune diseases	IL1A	Inverse variance weighted	15	1.05104	0.0497831	0.0121481	0.0108748	0.0886914	0.0198512	1.01093	1.09274
Autoimmune diseases	IL1A	Simple mode	15	1.07375	0.0711595	0.168351	-0.0248498	0.167169	0.0489843	0.975456	1.18195
Autoimmune diseases	IL1A	Weighted mode	15	1.07375	0.0711595	0.168059	-0.0247792	0.167098	0.0489483	0.975525	1.18187
Autoimmune diseases	IL1B	MR Egger	13	1.03757	0.03688	0.456072	-0.0566873	0.130447	0.0477384	0.944889	1.13934
Autoimmune diseases	IL1B	Weighted median	13	0.990882	-0.00915956	0.715622	-0.0584374	0.0401183	0.0251418	0.943237	1.04093
Autoimmune diseases	IL1B	Inverse variance weighted	13	0.988539	-0.0115271	0.549129	-0.0492411	0.0261869	0.0192418	0.951952	1.02653
Autoimmune diseases	IL1B	Simple mode	13	1.03766	0.0369724	0.48394	-0.0633521	0.137297	0.051186	0.938613	1.14717
Autoimmune diseases	IL1B	Weighted mode	13	0.985341	-0.0147673	0.600675	-0.0686057	0.039071	0.0274685	0.933695	1.03984
Autoimmune diseases	IL1R1	MR Egger	19	1.02706	0.0267005	0.382176	-0.031633	0.0850341	0.029762	0.968862	1.08875
Autoimmune diseases	IL1R1	Weighted median	19	1.03859	0.0378602	0.0891698	-0.00579569	0.0815161	0.0222734	0.994221	1.08493
Autoimmune diseases	IL1R1	Inverse variance weighted	19	1.02581	0.0254814	0.106186	-0.00543233	0.0563951	0.0157723	0.994582	1.05802
Autoimmune diseases	IL1R1	Simple mode	19	1.03639	0.0357459	0.384452	-0.0428478	0.11434	0.0400988	0.958057	1.12113
Autoimmune diseases	IL1R1	Weighted mode	19	1.04699	0.0459195	0.231129	-0.0267004	0.118539	0.037051	0.973653	1.12585
Autoimmune diseases	IL1R2	MR Egger	12	1.00549	0.00547511	0.85455	-0.0515712	0.0625214	0.0291053	0.949736	1.06452
Autoimmune diseases	IL1R2	Weighted median	12	1.00261	0.00260455	0.887023	-0.0333274	0.0385365	0.0183326	0.967222	1.03929
Autoimmune diseases	IL1R2	Inverse variance weighted	12	0.992076	-0.00795586	0.581162	-0.0362209	0.0203092	0.0144209	0.964427	1.02052
Autoimmune diseases	IL1R2	Simple mode	12	0.992053	-0.00797885	0.782956	-0.0633761	0.0474184	0.0282639	0.93859	1.04856
Autoimmune diseases	IL1R2	Weighted mode	12	1.00492	0.00490991	0.808339	-0.0338188	0.0436387	0.0197596	0.966747	1.0446
Autoimmune diseases	IL1RAP	MR Egger	13	1.02516	0.0248532	0.165145	-0.00790878	0.0576152	0.0167153	0.992122	1.05931
Autoimmune diseases	IL1RAP	Weighted median	13	1.0064	0.00637978	0.645462	-0.0207991	0.0335587	0.0138668	0.979416	1.03413
Autoimmune diseases	IL1RAP	Inverse variance weighted	13	0.990917	-0.00912468	0.483582	-0.0346536	0.0164042	0.013025	0.96594	1.01654
Autoimmune diseases	IL1RAP	Simple mode	13	0.945539	-0.0559999	0.237209	-0.144223	0.0322229	0.0450116	0.865695	1.03275
Autoimmune diseases	IL1RAP	Weighted mode	13	1.00636	0.0063394	0.657995	-0.0210345	0.0337133	0.0139663	0.979185	1.03429
Autoimmune diseases	IL1RAPL2	MR Egger	13	0.913873	-0.0900638	0.11769	-0.194059	0.0139311	0.0530586	0.82361	1.01403
Autoimmune diseases	IL1RAPL2	Weighted median	13	0.986776	-0.0133123	0.663973	-0.0733722	0.0467476	0.0306428	0.929255	1.04786
Autoimmune diseases	IL1RAPL2	Inverse variance weighted	13	1.01	0.00994712	0.694346	-0.0396665	0.0595607	0.0253131	0.96111	1.06137
Autoimmune diseases	IL1RAPL2	Simple mode	13	0.973143	-0.027224	0.603885	-0.127369	0.0729206	0.0510942	0.880409	1.07565
Autoimmune diseases	IL1RAPL2	Weighted mode	13	0.967827	-0.0327014	0.500836	-0.125044	0.0596408	0.0471134	0.882458	1.06146
Autoimmune diseases	IL1RL1	MR Egger	16	1.00237	0.00236542	0.875734	-0.0267445	0.0314753	0.014852	0.97361	1.03198
Autoimmune diseases	IL1RL1	Weighted median	16	1.00548	0.00546302	0.577696	-0.013769	0.0246951	0.00981227	0.986325	1.025
Autoimmune diseases	IL1RL1	Inverse variance weighted	16	1.00387	0.00386632	0.679092	-0.0144512	0.0221838	0.00934565	0.985653	1.02243
Autoimmune diseases	IL1RL1	Simple mode	16	1.01741	0.0172578	0.531799	-0.0355905	0.070106	0.0269634	0.965035	1.07262
Autoimmune diseases	IL1RL1	Weighted mode	16	1.0064	0.00637927	0.535147	-0.0133185	0.026077	0.0100499	0.98677	1.02642
Autoimmune diseases	IL1RL2	MR Egger	11	1.00362	0.00361384	0.942874	-0.0925156	0.0997433	0.0490456	0.911635	1.10489
Autoimmune diseases	IL1RL2	Weighted median	11	1.02255	0.0222979	0.415659	-0.0313939	0.0759896	0.0273938	0.969094	1.07895
Autoimmune diseases	IL1RL2	Inverse variance weighted	11	1.02397	0.0236877	0.26278	-0.0177715	0.065147	0.0211527	0.982385	1.06732
Autoimmune diseases	IL1RL2	Simple mode	11	1.01733	0.0171827	0.690871	-0.0650774	0.0994427	0.0419694	0.936995	1.10456
Autoimmune diseases	IL1RL2	Weighted mode	11	1.02228	0.0220334	0.503288	-0.0401641	0.0842309	0.0317334	0.960632	1.08788
Autoimmune diseases	IL1RN	MR Egger	15	0.99812	-0.00188212	0.966806	-0.0888374	0.0850732	0.044365	0.914994	1.0888
Autoimmune diseases	IL1RN	Weighted median	15	0.977801	-0.0224493	0.323174	-0.0669862	0.0220877	0.0227229	0.935208	1.02233
Autoimmune diseases	IL1RN	Inverse variance weighted	15	0.990466	-0.00957971	0.631728	-0.0487543	0.0295948	0.019987	0.952415	1.03004
Autoimmune diseases	IL1RN	Simple mode	15	0.990897	-0.00914419	0.784258	-0.0733629	0.0550745	0.0327646	0.929264	1.05662
Autoimmune diseases	IL1RN	Weighted mode	15	0.980006	-0.0201962	0.469209	-0.0734046	0.0330123	0.0271472	0.929225	1.03356
Autoimmune diseases	IL20	MR Egger	5	0.783702	-0.243726	0.0743163	-0.421209	-0.0662437	0.0905524	0.656253	0.935903
Autoimmune diseases	IL20	Weighted median	5	1.00497	0.0049624	0.909565	-0.080666	0.0905908	0.0436879	0.922502	1.09482
Autoimmune diseases	IL20	Inverse variance weighted	5	0.964628	-0.0360129	0.453116	-0.130098	0.058072	0.0480025	0.87801	1.05979
Autoimmune diseases	IL20	Simple mode	5	1.0051	0.00508619	0.922984	-0.0917805	0.101953	0.0494218	0.912305	1.10733
Autoimmune diseases	IL20	Weighted mode	5	1.0051	0.00508619	0.918724	-0.0866796	0.096852	0.0468193	0.916971	1.1017
Autoimmune diseases	IL21	MR Egger	7	0.864201	-0.145951	0.686	-0.812227	0.520326	0.339937	0.443868	1.68258
Autoimmune diseases	IL21	Weighted median	7	0.74539	-0.293847	2.29e-10	-0.384687	-0.203008	0.0463465	0.680664	0.816272
Autoimmune diseases	IL21	Inverse variance weighted	7	0.708551	-0.344534	0.00560163	-0.438792	-0.250276	0.048091	0.644815	0.778586
Autoimmune diseases	IL21	Simple mode	7	0.701052	-0.355173	0.000361	-0.45174	-0.258605	0.0492692	0.63652	0.772128
Autoimmune diseases	IL21	Weighted mode	7	0.71465	-0.335963	0.000406	-0.429291	-0.242635	0.0476162	0.650971	0.784558
Autoimmune diseases	IL22	MR Egger	16	0.990204	-0.00984395	0.860287	-0.117465	0.0977769	0.0549086	0.889172	1.10272
Autoimmune diseases	IL22	Weighted median	16	1.03998	0.039202	0.146116	-0.0136648	0.0920688	0.0269729	0.986428	1.09644
Autoimmune diseases	IL22	Inverse variance weighted	16	1.01829	0.0181237	0.424133	-0.0263198	0.0625673	0.0226753	0.974024	1.06457
Autoimmune diseases	IL22	Simple mode	16	1.03377	0.0332128	0.504724	-0.0620305	0.128456	0.0485935	0.939854	1.13707
Autoimmune diseases	IL22	Weighted mode	16	1.0465	0.0454518	0.247486	-0.0285789	0.119482	0.0377707	0.971826	1.12691
Autoimmune diseases	IL2	MR Egger	19	0.892609	-0.113607	0.0321496	-0.209025	-0.0181891	0.0486826	0.811375	0.981975
Autoimmune diseases	IL2	Weighted median	19	0.988112	-0.011959	0.623169	-0.0596622	0.0357442	0.0243384	0.942083	1.03639
Autoimmune diseases	IL2	Inverse variance weighted	19	1.01968	0.0194869	0.380651	-0.0240792	0.063053	0.0222276	0.976208	1.06508
Autoimmune diseases	IL2	Simple mode	19	0.989061	-0.0109994	0.777777	-0.0862515	0.0642528	0.038394	0.917363	1.06636
Autoimmune diseases	IL2	Weighted mode	19	0.979175	-0.0210448	0.536894	-0.0865634	0.0444739	0.0334279	0.917077	1.04548
Autoimmune diseases	IL24	MR Egger	16	1.00125	0.00125176	0.978621	-0.0886827	0.0911862	0.0458849	0.915136	1.09547
Autoimmune diseases	IL24	Weighted median	16	1.00539	0.00537218	0.833178	-0.0446189	0.0553632	0.0255056	0.956362	1.05692
Autoimmune diseases	IL24	Inverse variance weighted	16	1.00613	0.00611492	0.737144	-0.0295939	0.0418238	0.0182188	0.97084	1.04271
Autoimmune diseases	IL24	Simple mode	16	0.99758	-0.00242265	0.958359	-0.091859	0.0870137	0.0456308	0.912234	1.09091
Autoimmune diseases	IL24	Weighted mode	16	1.00249	0.00249084	0.953945	-0.0806407	0.0856224	0.0424141	0.922525	1.08939
Autoimmune diseases	IL25	MR Egger	15	0.998995	-0.00100596	0.953208	-0.0339656	0.0319537	0.0168162	0.966605	1.03247
Autoimmune diseases	IL25	Weighted median	15	1.00301	0.00300958	0.810191	-0.0215503	0.0275694	0.0125305	0.97868	1.02795
Autoimmune diseases	IL25	Inverse variance weighted	15	1.00779	0.00776059	0.466706	-0.0131376	0.0286588	0.0106624	0.986948	1.02907
Autoimmune diseases	IL25	Simple mode	15	0.990102	-0.00994705	0.734958	-0.066399	0.0465049	0.028802	0.935757	1.0476
Autoimmune diseases	IL25	Weighted mode	15	1.00215	0.00214711	0.8718	-0.0234578	0.0277521	0.0130638	0.976815	1.02814
Autoimmune diseases	IL27	MR Egger	19	1.06184	0.0599986	0.377922	-0.0698899	0.189887	0.0662696	0.932497	1.20911
Autoimmune diseases	IL27	Weighted median	19	0.99853	-0.00147104	0.956108	-0.0538573	0.0509153	0.0267277	0.947567	1.05223
Autoimmune diseases	IL27	Inverse variance weighted	19	0.994007	-0.00601144	0.764043	-0.044638	0.0326152	0.0197075	0.956344	1.03315
Autoimmune diseases	IL27	Simple mode	19	1.02573	0.0254046	0.55076	-0.0564872	0.107296	0.0417815	0.945079	1.11326
Autoimmune diseases	IL27	Weighted mode	19	1.0178	0.0176438	0.629914	-0.0529025	0.0881901	0.035993	0.948472	1.0922
Autoimmune diseases	IL27RA	MR Egger	12	1.03444	0.0338566	0.0467839	0.0045889	0.0631242	0.0149325	1.0046	1.06516
Autoimmune diseases	IL27RA	Weighted median	12	1.01859	0.0184159	0.104712	-0.00383175	0.0406636	0.0113509	0.996176	1.0415
Autoimmune diseases	IL27RA	Inverse variance weighted	12	1.01879	0.0186114	0.0648826	-0.00114864	0.0383714	0.0100816	0.998852	1.03912
Autoimmune diseases	IL27RA	Simple mode	12	1.00181	0.00180887	0.955775	-0.0606834	0.0643011	0.0318838	0.941121	1.06641
Autoimmune diseases	IL27RA	Weighted mode	12	1.01911	0.0189333	0.127675	-0.00359	0.0414566	0.0114915	0.996416	1.04233
Autoimmune diseases	IL2RA	MR Egger	8	0.954194	-0.0468887	0.590053	-0.208425	0.114648	0.0824165	0.811862	1.12148
Autoimmune diseases	IL2RA	Weighted median	8	1.02051	0.0202977	0.498701	-0.0385071	0.0791025	0.0300024	0.962225	1.08232
Autoimmune diseases	IL2RA	Inverse variance weighted	8	1.00989	0.00984329	0.698083	-0.0398921	0.0595787	0.0253752	0.960893	1.06139
Autoimmune diseases	IL2RA	Simple mode	8	1.02819	0.0277966	0.547728	-0.0584663	0.114059	0.0440117	0.94321	1.12082
Autoimmune diseases	IL2RA	Weighted mode	8	1.02791	0.0275266	0.57337	-0.0638288	0.118882	0.0466099	0.938166	1.12624
Autoimmune diseases	IL2RB	MR Egger	13	0.945883	-0.0556364	0.840774	-0.585734	0.474461	0.270458	0.556697	1.60715
Autoimmune diseases	IL2RB	Weighted median	13	0.994069	-0.00594822	0.848604	-0.0670194	0.0551229	0.0311588	0.935177	1.05667
Autoimmune diseases	IL2RB	Inverse variance weighted	13	1.02297	0.0227092	0.307955	-0.0187251	0.0641435	0.0211399	0.981449	1.06625
Autoimmune diseases	IL2RB	Simple mode	13	0.992895	-0.00713039	0.876685	-0.0952943	0.0810336	0.0449816	0.909105	1.08441
Autoimmune diseases	IL2RB	Weighted mode	13	0.992895	-0.00713039	0.863501	-0.0866967	0.0724359	0.0405951	0.916955	1.07512
Autoimmune diseases	IL31	MR Egger	12	1.11279	0.106874	0.0515482	0.012096	0.201652	0.0483562	1.01217	1.22342
Autoimmune diseases	IL31	Weighted median	12	1.01277	0.0126872	0.502601	-0.0244054	0.0497798	0.0189248	0.97589	1.05104
Autoimmune diseases	IL31	Inverse variance weighted	12	1.00639	0.00636648	0.784552	-0.0392762	0.0520091	0.0232871	0.961485	1.05339
Autoimmune diseases	IL31	Simple mode	12	0.955987	-0.0450105	0.394965	-0.144667	0.0546464	0.0508453	0.86531	1.05617
Autoimmune diseases	IL31	Weighted mode	12	1.01309	0.013005	0.554858	-0.0288463	0.0548563	0.0213527	0.971566	1.05639
Autoimmune diseases	IL32	MR Egger	14	1.02951	0.029087	0.660934	-0.0976844	0.155858	0.0646793	0.906935	1.16866
Autoimmune diseases	IL32	Weighted median	14	1.03243	0.0319161	0.31751	-0.0306652	0.0944975	0.0319293	0.9698	1.09911
Autoimmune diseases	IL32	Inverse variance weighted	14	1.04129	0.0404624	0.155314	-0.0153475	0.0962723	0.0284744	0.98477	1.10106
Autoimmune diseases	IL32	Simple mode	14	1.03779	0.0370914	0.42311	-0.0508065	0.124989	0.0448459	0.950463	1.13314
Autoimmune diseases	IL32	Weighted mode	14	1.02707	0.0267091	0.496301	-0.0480829	0.101501	0.0381592	0.953055	1.10683
Autoimmune diseases	IL34	MR Egger	19	1.02625	0.0259121	0.380966	-0.0305518	0.0823761	0.0288081	0.96991	1.08586
Autoimmune diseases	IL34	Weighted median	19	1.0003	0.000295771	0.988212	-0.0389419	0.0395335	0.0200192	0.961807	1.04033
Autoimmune diseases	IL34	Inverse variance weighted	19	1.00865	0.00861129	0.60983	-0.0244626	0.0416851	0.0168744	0.975834	1.04257
Autoimmune diseases	IL34	Simple mode	19	0.984376	-0.0157471	0.644044	-0.081425	0.0499307	0.0335091	0.921802	1.0512
Autoimmune diseases	IL34	Weighted mode	19	0.995915	-0.00409374	0.860929	-0.0492424	0.041055	0.0230351	0.95195	1.04191
Autoimmune diseases	IL3	MR Egger	9	0.840689	-0.173533	0.0685049	-0.331652	-0.0154145	0.0806729	0.717737	0.984704
Autoimmune diseases	IL3	Weighted median	9	1.00979	0.00974635	0.768076	-0.0550327	0.0745254	0.0330505	0.946454	1.07737
Autoimmune diseases	IL3	Inverse variance weighted	9	0.988111	-0.0119601	0.6325	-0.0609796	0.0370595	0.02501	0.940842	1.03775
Autoimmune diseases	IL3	Simple mode	9	1.01262	0.0125395	0.811558	-0.0871959	0.112275	0.0508854	0.916498	1.11882
Autoimmune diseases	IL3	Weighted mode	9	1.01714	0.0169965	0.757997	-0.0874787	0.121472	0.0533037	0.916238	1.12916
Autoimmune diseases	IL36 alpha	MR Egger	12	0.827709	-0.189093	0.512827	-0.735302	0.357115	0.278678	0.479361	1.4292
Autoimmune diseases	IL36 alpha	Weighted median	12	0.99928	-0.000720707	0.971526	-0.0402958	0.0388544	0.0201914	0.960505	1.03962
Autoimmune diseases	IL36 alpha	Inverse variance weighted	12	0.960454	-0.0403494	0.0312291	-0.0706738	-0.010025	0.0154716	0.931766	0.990025
Autoimmune diseases	IL36 alpha	Simple mode	12	0.988451	-0.0116161	0.7347	-0.0771152	0.053883	0.0334179	0.925783	1.05536
Autoimmune diseases	IL36 alpha	Weighted mode	12	1.00722	0.00719632	0.734104	-0.0332862	0.0476788	0.0206543	0.967262	1.04883
Autoimmune diseases	IL36 beta	MR Egger	15	0.958066	-0.0428387	0.282703	-0.117761	0.0320839	0.0382258	0.888908	1.0326
Autoimmune diseases	IL36 beta	Weighted median	15	0.977793	-0.0224575	0.389564	-0.0736154	0.0287004	0.026101	0.929029	1.02912
Autoimmune diseases	IL36 beta	Inverse variance weighted	15	0.963669	-0.0370079	0.0503077	-0.074066	5.03e-05	0.0189072	0.92861	1.00005
Autoimmune diseases	IL36 beta	Simple mode	15	0.98381	-0.0163224	0.682051	-0.0927975	0.0601526	0.0390179	0.911378	1.062
Autoimmune diseases	IL36 beta	Weighted mode	15	0.982542	-0.0176121	0.602586	-0.082412	0.0471878	0.0330612	0.920892	1.04832
Autoimmune diseases	IL36 gamma	MR Egger	10	1.05291	0.0515597	0.468262	-0.0811641	0.184283	0.0677162	0.922042	1.20236
Autoimmune diseases	IL36 gamma	Weighted median	10	0.979196	-0.0210235	0.534991	-0.0874416	0.0453945	0.0338868	0.916272	1.04644
Autoimmune diseases	IL36 gamma	Inverse variance weighted	10	0.984104	-0.016024	0.566553	-0.0708228	0.0387747	0.0279585	0.931627	1.03954
Autoimmune diseases	IL36 gamma	Simple mode	10	0.973781	-0.0265686	0.657279	-0.140078	0.0869409	0.057913	0.86929	1.09083
Autoimmune diseases	IL36 gamma	Weighted mode	10	0.97123	-0.0291916	0.582287	-0.129478	0.0710951	0.0511667	0.878554	1.07368
Autoimmune diseases	IL37	MR Egger	13	0.928399	-0.0742938	0.0792299	-0.149582	0.000994144	0.0384122	0.861068	1.00099
Autoimmune diseases	IL37	Weighted median	13	1.00235	0.00234228	0.930692	-0.0504418	0.0551263	0.0269306	0.950809	1.05667
Autoimmune diseases	IL37	Inverse variance weighted	13	0.985957	-0.0141424	0.433036	-0.0494981	0.0212133	0.0180386	0.951707	1.02144
Autoimmune diseases	IL37	Simple mode	13	1.02317	0.0229014	0.572469	-0.0544538	0.100257	0.039467	0.947002	1.10545
Autoimmune diseases	IL37	Weighted mode	13	1.00548	0.00546035	0.856605	-0.0525067	0.0634274	0.029575	0.948848	1.06548
Autoimmune diseases	IL3RA	MR Egger	15	1.00649	0.00646923	0.808503	-0.0447934	0.0577319	0.0261544	0.956195	1.05943
Autoimmune diseases	IL3RA	Weighted median	15	0.992644	-0.00738317	0.567457	-0.032691	0.0179246	0.0129121	0.967838	1.01809
Autoimmune diseases	IL3RA	Inverse variance weighted	15	0.994643	-0.00537115	0.72283	-0.0343627	0.0236204	0.0147916	0.966221	1.0239
Autoimmune diseases	IL3RA	Simple mode	15	0.956629	-0.0443394	0.283744	-0.122302	0.0336227	0.0397766	0.884881	1.03419
Autoimmune diseases	IL3RA	Weighted mode	15	1.00022	0.000222691	0.985948	-0.0241207	0.0245661	0.0124201	0.976168	1.02487
Autoimmune diseases	IL4	MR Egger	17	1.02946	0.0290376	0.75096	-0.147023	0.205098	0.0898267	0.863274	1.22765
Autoimmune diseases	IL4	Weighted median	17	0.99654	-0.00346589	0.894777	-0.054827	0.0478952	0.0262046	0.946649	1.04906
Autoimmune diseases	IL4	Inverse variance weighted	17	1.00026	0.000264485	0.990626	-0.0431303	0.0436593	0.0221402	0.957787	1.04463
Autoimmune diseases	IL4	Simple mode	17	1.0158	0.0156795	0.703392	-0.0636	0.0949589	0.0404487	0.93838	1.09961
Autoimmune diseases	IL4	Weighted mode	17	1.0071	0.00707198	0.842182	-0.0614233	0.0755672	0.0349466	0.940425	1.0785
Autoimmune diseases	IL4RA	MR Egger	10	0.885721	-0.121353	0.0873902	-0.243514	0.000807442	0.0623268	0.783869	1.00081
Autoimmune diseases	IL4RA	Weighted median	10	0.995333	-0.00467836	0.881139	-0.066003	0.0566463	0.0312881	0.936128	1.05828
Autoimmune diseases	IL4RA	Inverse variance weighted	10	0.982188	-0.0179729	0.433316	-0.0629322	0.0269864	0.0229384	0.939007	1.02735
Autoimmune diseases	IL4RA	Simple mode	10	1.00339	0.00338017	0.952045	-0.103762	0.110522	0.0546641	0.90144	1.11686
Autoimmune diseases	IL4RA	Weighted mode	10	1.00463	0.00461615	0.933333	-0.100563	0.109796	0.053663	0.904328	1.11605
Autoimmune diseases	IL5	MR Egger	10	0.970367	-0.0300811	0.730271	-0.195197	0.135035	0.0842428	0.822673	1.14458
Autoimmune diseases	IL5	Weighted median	10	0.966876	-0.0336852	0.28174	-0.0950211	0.0276506	0.0312938	0.909354	1.02804
Autoimmune diseases	IL5	Inverse variance weighted	10	0.971727	-0.0286799	0.258591	-0.0784375	0.0210778	0.0253866	0.92456	1.0213
Autoimmune diseases	IL5	Simple mode	10	0.976851	-0.0234209	0.685503	-0.133151	0.0863096	0.055985	0.875333	1.09014
Autoimmune diseases	IL5	Weighted mode	10	0.954893	-0.0461561	0.385793	-0.145405	0.0530928	0.0506372	0.864672	1.05453
Autoimmune diseases	IL5RA	MR Egger	9	1.08148	0.0783287	0.518352	-0.147441	0.304099	0.115189	0.862913	1.3554
Autoimmune diseases	IL5RA	Weighted median	9	0.992495	-0.00753291	0.838902	-0.0801577	0.0650919	0.0370535	0.922971	1.06726
Autoimmune diseases	IL5RA	Inverse variance weighted	9	1.02073	0.020522	0.544333	-0.0426141	0.0836581	0.0322123	0.958281	1.08726
Autoimmune diseases	IL5RA	Simple mode	9	1.06111	0.0593194	0.383386	-0.0667531	0.185392	0.0643227	0.935426	1.20369
Autoimmune diseases	IL5RA	Weighted mode	9	1.00249	0.00248317	0.954035	-0.0793539	0.0843202	0.0417536	0.923713	1.08798
Autoimmune diseases	IL6	MR Egger	13	1.02724	0.026876	0.502639	-0.0491299	0.102882	0.0387785	0.952057	1.10836
Autoimmune diseases	IL6	Weighted median	13	1.00621	0.00618733	0.819514	-0.0469624	0.0593371	0.0271172	0.954123	1.06113
Autoimmune diseases	IL6	Inverse variance weighted	13	0.987802	-0.0122727	0.544348	-0.0519503	0.0274048	0.0202436	0.949376	1.02778
Autoimmune diseases	IL6	Simple mode	13	0.993214	-0.00680914	0.882514	-0.0952155	0.0815972	0.0451053	0.909177	1.08502
Autoimmune diseases	IL6	Weighted mode	13	1.00567	0.00565686	0.866514	-0.0589075	0.0702212	0.032941	0.942794	1.07275
Autoimmune diseases	IL6RA	MR Egger	9	1.00863	0.00858818	0.623585	-0.0242095	0.0413858	0.0167335	0.976081	1.04225
Autoimmune diseases	IL6RA	Weighted median	9	1.00282	0.00281113	0.781733	-0.0170755	0.0226977	0.0101462	0.983069	1.02296
Autoimmune diseases	IL6RA	Inverse variance weighted	9	1.00191	0.00190446	0.8408	-0.0166784	0.0204874	0.00948106	0.98346	1.0207
Autoimmune diseases	IL6RA	Simple mode	9	0.987696	-0.0123807	0.662165	-0.0658773	0.0411158	0.0272941	0.936246	1.04197
Autoimmune diseases	IL6RA	Weighted mode	9	1.00286	0.00285233	0.790347	-0.0174832	0.0231879	0.0103753	0.982669	1.02346
Autoimmune diseases	IL6RB	MR Egger	14	1.01546	0.0153431	0.780821	-0.0903318	0.121018	0.0539157	0.913628	1.12865
Autoimmune diseases	IL6RB	Weighted median	14	0.990303	-0.00974472	0.676891	-0.0555792	0.0360897	0.0233849	0.945937	1.03675
Autoimmune diseases	IL6RB	Inverse variance weighted	14	0.98163	-0.0185404	0.317443	-0.0548895	0.0178087	0.0185455	0.94659	1.01797
Autoimmune diseases	IL6RB	Simple mode	14	1.01014	0.0100847	0.782279	-0.0599732	0.0801427	0.0357439	0.94179	1.08344
Autoimmune diseases	IL6RB	Weighted mode	14	0.999026	-0.000974725	0.972242	-0.0548329	0.0528834	0.0274786	0.946643	1.05431
Autoimmune diseases	IL7	MR Egger	18	1.03134	0.0308603	0.497895	-0.056349	0.11807	0.0444946	0.945209	1.12532
Autoimmune diseases	IL7	Weighted median	18	1.01021	0.010157	0.715692	-0.0445012	0.0648152	0.0278868	0.956474	1.06696
Autoimmune diseases	IL7	Inverse variance weighted	18	1.01203	0.0119626	0.576044	-0.0299685	0.0538937	0.0213934	0.970476	1.05537
Autoimmune diseases	IL7	Simple mode	18	0.957292	-0.0436471	0.391333	-0.140904	0.0536095	0.0496207	0.868573	1.05507
Autoimmune diseases	IL7	Weighted mode	18	1.00797	0.0079401	0.837202	-0.0666476	0.0825278	0.0380549	0.935525	1.08603
Autoimmune diseases	IL7RA	MR Egger	13	1.02928	0.0288611	0.73865	-0.136446	0.194168	0.0843402	0.872454	1.2143
Autoimmune diseases	IL7RA	Weighted median	13	0.987443	-0.0126365	0.680754	-0.0728343	0.0475613	0.0307132	0.929755	1.04871
Autoimmune diseases	IL7RA	Inverse variance weighted	13	0.992561	-0.00746686	0.801499	-0.0642882	0.0493545	0.0289905	0.937735	1.05059
Autoimmune diseases	IL7RA	Simple mode	13	0.973591	-0.0267641	0.576719	-0.11819	0.064662	0.0466459	0.888527	1.0668
Autoimmune diseases	IL7RA	Weighted mode	13	0.973591	-0.0267641	0.752801	-0.189545	0.136017	0.0830514	0.827336	1.1457
Autoimmune diseases	IL9	MR Egger	11	1.026	0.0256637	0.74174	-0.122329	0.173657	0.0755066	0.884857	1.18965
Autoimmune diseases	IL9	Weighted median	11	0.991627	-0.00840843	0.819516	-0.0806385	0.0638216	0.0368521	0.922527	1.0659
Autoimmune diseases	IL9	Inverse variance weighted	11	1.01204	0.0119645	0.680309	-0.0449482	0.0688771	0.0290371	0.956047	1.0713
Autoimmune diseases	IL9	Simple mode	11	0.971578	-0.0288341	0.655503	-0.151749	0.094081	0.0627118	0.859204	1.09865
Autoimmune diseases	IL9	Weighted mode	11	0.976727	-0.0235486	0.685442	-0.134215	0.087118	0.0564626	0.874402	1.09103
Autoimmune diseases	IL8	MR Egger	15	0.976872	-0.0233992	0.604335	-0.10976	0.0629617	0.0440617	0.896049	1.06499
Autoimmune diseases	IL8	Weighted median	15	0.985388	-0.0147198	0.528974	-0.0605457	0.0311061	0.0233806	0.941251	1.03159
Autoimmune diseases	IL8	Inverse variance weighted	15	0.984883	-0.0152328	0.382605	-0.0494283	0.0189627	0.0174467	0.951773	1.01914
Autoimmune diseases	IL8	Simple mode	15	0.990604	-0.00944063	0.811112	-0.0854152	0.066534	0.0387626	0.918131	1.0688
Autoimmune diseases	IL8	Weighted mode	15	0.973957	-0.0263884	0.496277	-0.10043	0.0476531	0.0377763	0.904448	1.04881
Autoimmune diseases	ILF3	MR Egger	7	0.839927	-0.17444	0.240756	-0.431383	0.0825024	0.131093	0.64961	1.086
Autoimmune diseases	ILF3	Weighted median	7	0.961207	-0.039565	0.393671	-0.130478	0.0513485	0.0463844	0.877675	1.05269
Autoimmune diseases	ILF3	Inverse variance weighted	7	0.973367	-0.0269946	0.524471	-0.110124	0.0561351	0.0424131	0.895723	1.05774
Autoimmune diseases	ILF3	Simple mode	7	0.911356	-0.0928222	0.255535	-0.237579	0.0519348	0.0738556	0.788534	1.05331
Autoimmune diseases	ILF3	Weighted mode	7	0.914487	-0.089392	0.176173	-0.203685	0.0249012	0.0583128	0.815719	1.02521
Autoimmune diseases	TIRAP	MR Egger	14	0.987042	-0.0130429	0.63871	-0.0661174	0.0400317	0.0270789	0.936021	1.04084
Autoimmune diseases	TIRAP	Weighted median	14	1.00339	0.00338557	0.83988	-0.0294568	0.036228	0.0167563	0.970973	1.03689
Autoimmune diseases	TIRAP	Inverse variance weighted	14	1.00669	0.00667229	0.679826	-0.0250158	0.0383603	0.0161674	0.975295	1.03911
Autoimmune diseases	TIRAP	Simple mode	14	0.997051	-0.00295296	0.919398	-0.0590495	0.0531436	0.0286207	0.94266	1.05458
Autoimmune diseases	TIRAP	Weighted mode	14	1.00035	0.000345604	0.982802	-0.0304805	0.0311717	0.0157276	0.969979	1.03166

## Sheet: if_celiac disease
Odds Ratios and Confidence Intervals for Inflammatory Cytokines in Relation to Celiac Disease
Autoimmune diseases	inflammatory_factors	statistical_methods	nsnp	OR	beta	Pval	lo_ci	up_ci	se	or_lci95	or_uci95
Celiac disease	MCSF	MR Egger	7	1.01469	0.0145822	0.959463	-0.520407	0.549571	0.272954	0.594279	1.73251
Celiac disease	MCSF	Weighted median	7	0.956426	-0.0445517	0.726628	-0.294317	0.205213	0.127431	0.745041	1.22779
Celiac disease	MCSF	Inverse variance weighted	7	0.861223	-0.149402	0.244357	-0.400937	0.102133	0.128334	0.669692	1.10753
Celiac disease	MCSF	Simple mode	7	0.902211	-0.102907	0.63636	-0.508107	0.302294	0.206735	0.601633	1.35296
Celiac disease	MCSF	Weighted mode	7	1.00799	0.00795609	0.954609	-0.254837	0.270749	0.134078	0.775043	1.31095
Celiac disease	GCSF	MR Egger	8	1.06547	0.0634172	0.835848	-0.510979	0.637814	0.29306	0.599908	1.89234
Celiac disease	GCSF	Weighted median	8	1.15062	0.140304	0.335772	-0.145391	0.425999	0.145763	0.864684	1.53112
Celiac disease	GCSF	Inverse variance weighted	8	1.16844	0.155672	0.165347	-0.0642624	0.375606	0.112211	0.937759	1.45587
Celiac disease	GCSF	Simple mode	8	1.20099	0.183147	0.420898	-0.236747	0.603042	0.214232	0.789191	1.82767
Celiac disease	GCSF	Weighted mode	8	1.20099	0.183147	0.394099	-0.212225	0.57852	0.201721	0.808783	1.7834
Celiac disease	GCSFR	MR Egger	8	0.961675	-0.0390785	0.912878	-0.710343	0.632186	0.342482	0.491476	1.88172
Celiac disease	GCSFR	Weighted median	8	1.14098	0.13189	0.334281	-0.135844	0.399623	0.136599	0.872979	1.49126
Celiac disease	GCSFR	Inverse variance weighted	8	1.132	0.123985	0.237753	-0.0818478	0.329817	0.105017	0.921412	1.39071
Celiac disease	GCSFR	Simple mode	8	1.08027	0.0772087	0.706798	-0.308945	0.463363	0.197017	0.734221	1.58941
Celiac disease	GCSFR	Weighted mode	8	1.10937	0.103792	0.61079	-0.278167	0.485752	0.194877	0.75717	1.6254
Celiac disease	GM-CSF	MR Egger	9	1.18347	0.168447	0.543608	-0.348822	0.685717	0.263913	0.705519	1.98519
Celiac disease	GM-CSF	Weighted median	9	1.13038	0.12255	0.297618	-0.108064	0.353164	0.11766	0.89757	1.42356
Celiac disease	GM-CSF	Inverse variance weighted	9	1.09819	0.0936654	0.316406	-0.0895761	0.276907	0.0934906	0.914319	1.31904
Celiac disease	GM-CSF	Simple mode	9	1.13851	0.129717	0.485725	-0.218162	0.477597	0.17749	0.803995	1.6122
Celiac disease	GM-CSF	Weighted mode	9	1.15815	0.146827	0.390462	-0.170148	0.463802	0.161722	0.84354	1.59011
Celiac disease	CSF2RA	MR Egger	11	1.2952	0.258667	0.307528	-0.21004	0.727375	0.239137	0.810551	2.06964
Celiac disease	CSF2RA	Weighted median	11	1.04487	0.0438966	0.72291	-0.198754	0.286548	0.123802	0.819751	1.33182
Celiac disease	CSF2RA	Inverse variance weighted	11	1.05949	0.0577902	0.586589	-0.150506	0.266087	0.106274	0.860272	1.30485
Celiac disease	CSF2RA	Simple mode	11	1.16394	0.151808	0.527738	-0.30301	0.606626	0.23205	0.738592	1.83423
Celiac disease	CSF2RA	Weighted mode	11	1.05644	0.0549054	0.80132	-0.361519	0.47133	0.212461	0.696617	1.60212
Celiac disease	CXCL10	MR Egger	6	0.960517	-0.0402835	0.871475	-0.498193	0.417626	0.233627	0.607628	1.51835
Celiac disease	CXCL10	Weighted median	6	1.03939	0.0386376	0.747239	-0.196342	0.273617	0.119888	0.821731	1.31471
Celiac disease	CXCL10	Inverse variance weighted	6	0.932629	-0.069748	0.553919	-0.30071	0.161214	0.117838	0.740292	1.17494
Celiac disease	CXCL10	Simple mode	6	1.04416	0.0432113	0.791908	-0.261091	0.347514	0.155256	0.770211	1.41554
Celiac disease	CXCL10	Weighted mode	6	1.03918	0.0384273	0.765736	-0.200944	0.277798	0.122128	0.817959	1.32022
Celiac disease	CXCL11	MR Egger	14	0.837647	-0.177158	0.429592	-0.601919	0.247603	0.216715	0.547759	1.28095
Celiac disease	CXCL11	Weighted median	14	1.03997	0.0391967	0.648131	-0.129147	0.20754	0.0858897	0.878845	1.23065
Celiac disease	CXCL11	Inverse variance weighted	14	1.02353	0.0232612	0.748232	-0.115548	0.162071	0.0708212	0.890877	1.17594
Celiac disease	CXCL11	Simple mode	14	1.08055	0.0774662	0.575211	-0.186664	0.341597	0.13476	0.829722	1.40719
Celiac disease	CXCL11	Weighted mode	14	1.12641	0.119036	0.301932	-0.0980013	0.336072	0.110733	0.906648	1.39944
Celiac disease	CXCL5	MR Egger	12	1.00293	0.002928	0.985787	-0.311269	0.317125	0.160305	0.732517	1.37317
Celiac disease	CXCL5	Weighted median	12	1.00881	0.00877106	0.939487	-0.217686	0.235228	0.115539	0.804378	1.2652
Celiac disease	CXCL5	Inverse variance weighted	12	1.00699	0.00696921	0.927387	-0.142917	0.156855	0.0764725	0.866826	1.16983
Celiac disease	CXCL5	Simple mode	12	1.11609	0.109834	0.590901	-0.279	0.498668	0.198385	0.75654	1.64653
Celiac disease	CXCL5	Weighted mode	12	1.04079	0.0399756	0.794281	-0.253292	0.333244	0.149627	0.776241	1.39549
Celiac disease	CXCL13	MR Egger	16	0.995936	-0.0040718	0.983102	-0.374203	0.36606	0.188843	0.687837	1.44204
Celiac disease	CXCL13	Weighted median	16	0.907464	-0.0971009	0.370119	-0.30945	0.115248	0.108341	0.733851	1.12215
Celiac disease	CXCL13	Inverse variance weighted	16	0.891609	-0.114728	0.138902	-0.266675	0.0372198	0.0775242	0.765922	1.03792
Celiac disease	CXCL13	Simple mode	16	0.936312	-0.0658067	0.750099	-0.463379	0.331766	0.202843	0.629154	1.39343
Celiac disease	CXCL13	Weighted mode	16	0.933202	-0.0691332	0.741954	-0.473109	0.334842	0.20611	0.623062	1.39772
Celiac disease	CXCL14	MR Egger	11	1.33136	0.286204	0.199133	-0.11854	0.690948	0.206502	0.888216	1.99561
Celiac disease	CXCL14	Weighted median	11	0.979699	-0.0205103	0.860029	-0.248482	0.207462	0.116312	0.779984	1.23055
Celiac disease	CXCL14	Inverse variance weighted	11	0.989581	-0.0104741	0.9162	-0.205579	0.184631	0.0995434	0.814176	1.20277
Celiac disease	CXCL14	Simple mode	11	0.811646	-0.208691	0.371476	-0.645838	0.228455	0.223034	0.524223	1.25666
Celiac disease	CXCL14	Weighted mode	11	1.14838	0.138351	0.439431	-0.198421	0.475123	0.171822	0.820024	1.60821
Celiac disease	CXCL9	MR Egger	10	1.71748	0.540858	0.166369	-0.155394	1.23711	0.355231	0.856077	3.44564
Celiac disease	CXCL9	Weighted median	10	1.0021	0.00210034	0.989788	-0.319529	0.32373	0.164097	0.726491	1.38227
Celiac disease	CXCL9	Inverse variance weighted	10	1.04774	0.0466397	0.7353	-0.223749	0.317028	0.137953	0.799516	1.37304
Celiac disease	CXCL9	Simple mode	10	1.31737	0.275639	0.41069	-0.35058	0.901858	0.3195	0.704279	2.46418
Celiac disease	CXCL9	Weighted mode	10	1.50241	0.407072	0.185851	-0.149964	0.964107	0.284202	0.860739	2.62245
Celiac disease	CXCL16	MR Egger	23	1.26272	0.233267	0.607808	-0.644257	1.11079	0.447716	0.525052	3.03676
Celiac disease	CXCL16	Weighted median	23	1.00452	0.00451257	0.952639	-0.144405	0.15343	0.0759782	0.865537	1.16583
Celiac disease	CXCL16	Inverse variance weighted	23	1.03252	0.0319994	0.485225	-0.0561111	0.12011	0.0449544	0.945434	1.12762
Celiac disease	CXCL16	Simple mode	23	1.04343	0.0425121	0.692998	-0.165786	0.25081	0.106275	0.847228	1.28507
Celiac disease	CXCL16	Weighted mode	23	1.00745	0.00742609	0.937208	-0.175233	0.190085	0.0931935	0.839261	1.20935
Celiac disease	CCL1	MR Egger	13	0.964712	-0.0359252	0.791599	-0.295997	0.224146	0.13269	0.74379	1.25125
Celiac disease	CCL1	Weighted median	13	0.971151	-0.0292738	0.729683	-0.195319	0.136772	0.0847172	0.822572	1.14657
Celiac disease	CCL1	Inverse variance weighted	13	0.906431	-0.0982404	0.17189	-0.239184	0.0427034	0.0719101	0.78727	1.04363
Celiac disease	CCL1	Simple mode	13	0.933963	-0.0683189	0.512717	-0.266815	0.130177	0.101273	0.765815	1.13903
Celiac disease	CCL1	Weighted mode	13	0.958363	-0.0425291	0.623987	-0.208209	0.123151	0.0845307	0.812037	1.13106
Celiac disease	CCL13	MR Egger	19	0.966547	-0.0340249	0.827475	-0.335339	0.267289	0.153732	0.715096	1.30642
Celiac disease	CCL13	Weighted median	19	0.935148	-0.0670509	0.45726	-0.243841	0.109739	0.090199	0.783612	1.11599
Celiac disease	CCL13	Inverse variance weighted	19	0.936432	-0.0656783	0.306185	-0.191482	0.060125	0.0641853	0.825735	1.06197
Celiac disease	CCL13	Simple mode	19	1.07038	0.0680135	0.662118	-0.232021	0.368048	0.153079	0.79293	1.44491
Celiac disease	CCL13	Weighted mode	19	0.842287	-0.171635	0.180335	-0.412985	0.0697152	0.123138	0.661672	1.0722
Celiac disease	CCL17	MR Egger	17	1.088	0.0843418	0.517907	-0.165307	0.333991	0.127372	0.847633	1.39653
Celiac disease	CCL17	Weighted median	17	1.04466	0.0436898	0.57164	-0.1077	0.19508	0.0772399	0.897897	1.21541
Celiac disease	CCL17	Inverse variance weighted	17	1.04555	0.0445457	0.478307	-0.078594	0.167686	0.0628264	0.924415	1.18256
Celiac disease	CCL17	Simple mode	17	1.10756	0.102164	0.422146	-0.140896	0.345224	0.12401	0.868579	1.41231
Celiac disease	CCL17	Weighted mode	17	1.06791	0.0657059	0.471544	-0.108935	0.240346	0.0891023	0.896789	1.27169
Celiac disease	CCL3	MR Egger	13	1.00172	0.00172026	0.984546	-0.168438	0.171879	0.0868154	0.844984	1.18753
Celiac disease	CCL3	Weighted median	13	1.01217	0.0120965	0.844504	-0.108785	0.132978	0.061674	0.896924	1.14222
Celiac disease	CCL3	Inverse variance weighted	13	0.992998	-0.00702711	0.893784	-0.110183	0.0961287	0.0526305	0.89567	1.1009
Celiac disease	CCL3	Simple mode	13	1.00091	0.000913263	0.994066	-0.234817	0.236643	0.12027	0.790716	1.26699
Celiac disease	CCL3	Weighted mode	13	1.01184	0.0117718	0.855747	-0.112445	0.135989	0.0633762	0.893646	1.14567
Celiac disease	CCL20	MR Egger	9	1.01375	0.0136578	0.980075	-1.02068	1.04799	0.527723	0.36035	2.85193
Celiac disease	CCL20	Weighted median	9	1.01802	0.0178633	0.887738	-0.230155	0.265881	0.12654	0.794411	1.30458
Celiac disease	CCL20	Inverse variance weighted	9	1.10416	0.0990825	0.399301	-0.131323	0.329488	0.117554	0.876935	1.39026
Celiac disease	CCL20	Simple mode	9	1.03214	0.0316367	0.844695	-0.274804	0.338078	0.156348	0.759721	1.40225
Celiac disease	CCL20	Weighted mode	9	1.0378	0.0370987	0.817444	-0.267703	0.3419	0.155511	0.765135	1.40762
Celiac disease	CCL22	MR Egger	16	1.14221	0.132965	0.43106	-0.188468	0.454397	0.163996	0.828227	1.57522
Celiac disease	CCL22	Weighted median	16	0.998464	-0.00153714	0.987033	-0.186907	0.183833	0.0945766	0.829521	1.20182
Celiac disease	CCL22	Inverse variance weighted	16	1.03426	0.0336822	0.634253	-0.105082	0.172447	0.0707982	0.90025	1.18821
Celiac disease	CCL22	Simple mode	16	0.970199	-0.0302542	0.831523	-0.304163	0.243654	0.139749	0.737741	1.2759
Celiac disease	CCL22	Weighted mode	16	1.05011	0.0488965	0.689554	-0.186413	0.284206	0.120056	0.829931	1.32871
Celiac disease	CCL5	MR Egger	16	0.932674	-0.0696995	0.682123	-0.39634	0.256941	0.166653	0.672778	1.29297
Celiac disease	CCL5	Weighted median	16	1.06693	0.0647876	0.489706	-0.11904	0.248615	0.0937896	0.887772	1.28225
Celiac disease	CCL5	Inverse variance weighted	16	1.04942	0.048233	0.490587	-0.088901	0.185367	0.0699663	0.914936	1.20366
Celiac disease	CCL5	Simple mode	16	1.15492	0.144032	0.373423	-0.163671	0.451734	0.156991	0.849021	1.57103
Celiac disease	CCL5	Weighted mode	16	1.10607	0.100817	0.458469	-0.158851	0.360485	0.132484	0.853123	1.43402
Celiac disease	CCL7	MR Egger	17	0.944391	-0.057215	0.554429	-0.242671	0.128241	0.0946202	0.78453	1.13683
Celiac disease	CCL7	Weighted median	17	0.944187	-0.0574312	0.433181	-0.201053	0.0861907	0.0732765	0.817869	1.09001
Celiac disease	CCL7	Inverse variance weighted	17	0.952753	-0.0483994	0.369624	-0.154134	0.0573353	0.0539463	0.857157	1.05901
Celiac disease	CCL7	Simple mode	17	0.957817	-0.0430983	0.752413	-0.306306	0.22011	0.13429	0.736161	1.24621
Celiac disease	CCL7	Weighted mode	17	0.943362	-0.0583049	0.467164	-0.211729	0.0951189	0.0782774	0.809184	1.09979
Celiac disease	CCL8	MR Egger	15	1.0746	0.071951	0.729057	-0.326487	0.470389	0.203285	0.721454	1.60062
Celiac disease	CCL8	Weighted median	15	0.943225	-0.05845	0.53967	-0.245242	0.128342	0.0953023	0.782515	1.13694
Celiac disease	CCL8	Inverse variance weighted	15	1.00151	0.0015069	0.982115	-0.130242	0.133255	0.0672186	0.877883	1.14254
Celiac disease	CCL8	Simple mode	15	1.22298	0.20129	0.237435	-0.118366	0.520945	0.163089	0.888371	1.68362
Celiac disease	CCL8	Weighted mode	15	0.913516	-0.0904543	0.526481	-0.363387	0.182478	0.139251	0.695318	1.20019
Celiac disease	TGFA	MR Egger	9	0.822731	-0.195126	0.595313	-0.882571	0.492319	0.350737	0.413718	1.63611
Celiac disease	TGFA	Weighted median	9	0.944488	-0.0571125	0.642849	-0.29851	0.184285	0.123162	0.741923	1.20236
Celiac disease	TGFA	Inverse variance weighted	9	1.01666	0.0165187	0.861558	-0.169137	0.202174	0.0947223	0.844393	1.22406
Celiac disease	TGFA	Simple mode	9	0.948529	-0.0528429	0.761088	-0.382025	0.276339	0.16795	0.682478	1.31829
Celiac disease	TGFA	Weighted mode	9	0.921041	-0.0822508	0.553889	-0.3432	0.178698	0.133137	0.709496	1.19566
Celiac disease	TGFB1	MR Egger	10	1.50223	0.406953	0.0874892	-0.00286194	0.816767	0.209089	0.997142	2.26317
Celiac disease	TGFB1	Weighted median	10	1.14753	0.137614	0.309261	-0.127659	0.402887	0.135343	0.880153	1.49614
Celiac disease	TGFB1	Inverse variance weighted	10	1.09214	0.0881398	0.435608	-0.133445	0.309724	0.113053	0.875076	1.36305
Celiac disease	TGFB1	Simple mode	10	1.25423	0.226525	0.329786	-0.20443	0.65748	0.219875	0.815112	1.92992
Celiac disease	TGFB1	Weighted mode	10	1.20146	0.183539	0.312138	-0.152415	0.519493	0.171405	0.858632	1.68117
Celiac disease	TGFB2	MR Egger	14	0.998923	-0.00107728	0.994825	-0.319889	0.317734	0.162659	0.72623	1.37401
Celiac disease	TGFB2	Weighted median	14	1.02444	0.0241498	0.81172	-0.174557	0.222857	0.101381	0.839829	1.24964
Celiac disease	TGFB2	Inverse variance weighted	14	0.963298	-0.0373928	0.593153	-0.17457	0.0997844	0.0699884	0.839818	1.10493
Celiac disease	TGFB2	Simple mode	14	0.969099	-0.0313886	0.856476	-0.364858	0.302081	0.170137	0.694295	1.35267
Celiac disease	TGFB2	Weighted mode	14	1.01532	0.0151999	0.905851	-0.231827	0.262227	0.126034	0.793083	1.29982
Celiac disease	TGFB3	MR Egger	13	1.23874	0.214092	0.28695	-0.160879	0.589063	0.191312	0.851395	1.8023
Celiac disease	TGFB3	Weighted median	13	1.12431	0.117173	0.250434	-0.0826532	0.317	0.101952	0.92067	1.373
Celiac disease	TGFB3	Inverse variance weighted	13	1.05331	0.0519331	0.489047	-0.0951978	0.199064	0.0750668	0.909193	1.22026
Celiac disease	TGFB3	Simple mode	13	1.14163	0.132454	0.404461	-0.167976	0.432883	0.153281	0.845374	1.5417
Celiac disease	TGFB3	Weighted mode	13	1.15047	0.140174	0.331403	-0.131248	0.411596	0.138481	0.877001	1.50923
Celiac disease	IL10	MR Egger	8	0.716831	-0.332915	0.173406	-0.755376	0.0895464	0.215541	0.469834	1.09368
Celiac disease	IL10	Weighted median	8	0.920807	-0.0825051	0.507186	-0.326328	0.161318	0.1244	0.721568	1.17506
Celiac disease	IL10	Inverse variance weighted	8	0.961725	-0.0390264	0.692711	-0.232589	0.154536	0.0987562	0.79248	1.16712
Celiac disease	IL10	Simple mode	8	0.913386	-0.0905969	0.68432	-0.509435	0.328241	0.213693	0.600835	1.38852
Celiac disease	IL10	Weighted mode	8	0.911029	-0.0931807	0.672539	-0.507354	0.320993	0.211313	0.602087	1.3785
Celiac disease	IL10RB	MR Egger	14	0.721232	-0.326795	0.0481736	-0.617996	-0.035594	0.148572	0.539024	0.965032
Celiac disease	IL10RB	Weighted median	14	0.864574	-0.145518	0.131028	-0.334394	0.0433587	0.0963656	0.715771	1.04431
Celiac disease	IL10RB	Inverse variance weighted	14	0.912299	-0.0917875	0.181762	-0.226511	0.0429364	0.0687367	0.79731	1.04387
Celiac disease	IL10RB	Simple mode	14	0.829668	-0.186729	0.293884	-0.521324	0.147865	0.170712	0.593734	1.15936
Celiac disease	IL10RB	Weighted mode	14	0.819174	-0.199459	0.15508	-0.45844	0.0595219	0.132133	0.632269	1.06133
Celiac disease	IL11	MR Egger	13	0.990526	-0.00951922	0.962139	-0.393726	0.374688	0.196024	0.674539	1.45454
Celiac disease	IL11	Weighted median	13	1.24986	0.223028	0.0679304	-0.0164365	0.462493	0.122176	0.983698	1.58803
Celiac disease	IL11	Inverse variance weighted	13	1.06232	0.0604525	0.518388	-0.123011	0.243916	0.093604	0.884254	1.27624
Celiac disease	IL11	Simple mode	13	1.39521	0.333043	0.152157	-0.0938451	0.759931	0.2178	0.910424	2.13813
Celiac disease	IL11	Weighted mode	13	1.32337	0.280179	0.196897	-0.121742	0.682101	0.205062	0.885377	1.97803
Celiac disease	IL11RA	MR Egger	10	1.16531	0.15299	0.317223	-0.128111	0.434091	0.143419	0.879756	1.54356
Celiac disease	IL11RA	Weighted median	10	1.02268	0.0224296	0.814268	-0.164704	0.209563	0.0954761	0.848145	1.23314
Celiac disease	IL11RA	Inverse variance weighted	10	0.95312	-0.0480146	0.566908	-0.212364	0.116335	0.083852	0.80867	1.12337
Celiac disease	IL11RA	Simple mode	10	1.09647	0.0920956	0.565615	-0.210574	0.394765	0.154423	0.810119	1.48404
Celiac disease	IL11RA	Weighted mode	10	1.035	0.0343994	0.764025	-0.183481	0.25228	0.111163	0.832368	1.28696
Celiac disease	IL12	MR Egger	17	1.39273	0.331268	0.0931017	-0.0307864	0.693323	0.184722	0.969683	2.00035
Celiac disease	IL12	Weighted median	17	1.04879	0.0476383	0.617081	-0.139107	0.234383	0.095278	0.870135	1.26413
Celiac disease	IL12	Inverse variance weighted	17	1.07903	0.0760592	0.256261	-0.0552539	0.207372	0.0669965	0.946245	1.23044
Celiac disease	IL12	Simple mode	17	1.0046	0.00459127	0.97997	-0.34828	0.357462	0.180036	0.705901	1.4297
Celiac disease	IL12	Weighted mode	17	0.949848	-0.0514532	0.776185	-0.400237	0.297331	0.177951	0.670161	1.34626
Celiac disease	IL23	MR Egger	16	1.01468	0.0145732	0.959416	-0.536786	0.565933	0.281306	0.584624	1.76109
Celiac disease	IL23	Weighted median	16	0.984513	-0.0156084	0.869783	-0.202223	0.171006	0.0952113	0.816913	1.1865
Celiac disease	IL23	Inverse variance weighted	16	1.02426	0.0239724	0.741067	-0.115424	0.163369	0.0711206	0.890988	1.17747
Celiac disease	IL23	Simple mode	16	1.03977	0.0389959	0.818346	-0.287998	0.36599	0.166833	0.749763	1.44194
Celiac disease	IL23	Weighted mode	16	0.984317	-0.0158074	0.877523	-0.213448	0.181833	0.100837	0.807794	1.19941
Celiac disease	IL13	MR Egger	13	1.07409	0.0714723	0.801746	-0.473112	0.616057	0.277849	0.62306	1.85161
Celiac disease	IL13	Weighted median	13	1.05121	0.0499418	0.687054	-0.193038	0.292922	0.123969	0.82445	1.34034
Celiac disease	IL13	Inverse variance weighted	13	1.02501	0.0247009	0.822573	-0.191203	0.240605	0.110155	0.825965	1.27202
Celiac disease	IL13	Simple mode	13	1.15008	0.139828	0.48489	-0.240439	0.520095	0.194014	0.786283	1.68219
Celiac disease	IL13	Weighted mode	13	1.09534	0.0910642	0.552043	-0.200643	0.382771	0.14883	0.818204	1.46634
Celiac disease	IL16	MR Egger	19	0.93057	-0.0719581	0.597365	-0.333976	0.19006	0.133683	0.716071	1.20932
Celiac disease	IL16	Weighted median	19	0.912767	-0.0912747	0.216063	-0.23589	0.0533404	0.0737832	0.789868	1.05479
Celiac disease	IL16	Inverse variance weighted	19	0.870154	-0.139085	0.0305532	-0.253995	-0.0241745	0.0586277	0.775695	0.976115
Celiac disease	IL16	Simple mode	19	0.978946	-0.0212784	0.881641	-0.297442	0.254885	0.1409	0.742716	1.29031
Celiac disease	IL16	Weighted mode	19	0.902819	-0.102233	0.158879	-0.238563	0.0340963	0.069556	0.787759	1.03468
Celiac disease	IL18BP	MR Egger	12	0.916584	-0.0871019	0.746408	-0.60061	0.426406	0.261994	0.548477	1.53174
Celiac disease	IL18BP	Weighted median	12	1.02385	0.0235745	0.863101	-0.244398	0.291547	0.136721	0.783176	1.3385
Celiac disease	IL18BP	Inverse variance weighted	12	1.08877	0.0850512	0.376448	-0.103426	0.273528	0.0961618	0.901743	1.31459
Celiac disease	IL18BP	Simple mode	12	0.91933	-0.0841101	0.716137	-0.525921	0.357701	0.225414	0.591011	1.43004
Celiac disease	IL18BP	Weighted mode	12	0.915611	-0.0881634	0.65929	-0.469544	0.293217	0.194582	0.625287	1.34073
Celiac disease	IL18R1	MR Egger	14	1.0446	0.0436311	0.589218	-0.110507	0.197769	0.0786419	0.89538	1.21868
Celiac disease	IL18R1	Weighted median	14	1.081	0.0778867	0.208737	-0.043555	0.199328	0.06196	0.95738	1.22058
Celiac disease	IL18R1	Inverse variance weighted	14	1.0834	0.0801039	0.11725	-0.0201267	0.180334	0.0511381	0.980074	1.19762
Celiac disease	IL18R1	Simple mode	14	1.11354	0.10754	0.399025	-0.134177	0.349257	0.123325	0.874435	1.41801
Celiac disease	IL18R1	Weighted mode	14	1.08165	0.0784864	0.229921	-0.0436317	0.200604	0.0623051	0.957306	1.22214
Celiac disease	IL19	MR Egger	15	1.0354	0.0347834	0.628342	-0.102735	0.172302	0.0701625	0.902366	1.18804
Celiac disease	IL19	Weighted median	15	0.968886	-0.0316088	0.470137	-0.117386	0.0541687	0.043764	0.889242	1.05566
Celiac disease	IL19	Inverse variance weighted	15	0.971063	-0.0293638	0.540263	-0.123341	0.0646135	0.0479476	0.883962	1.06675
Celiac disease	IL19	Simple mode	15	1.03207	0.0315672	0.846917	-0.28304	0.346175	0.160514	0.75349	1.41365
Celiac disease	IL19	Weighted mode	15	0.96973	-0.0307377	0.463409	-0.110652	0.0491761	0.0407724	0.895251	1.05041
Celiac disease	IL1A	MR Egger	15	0.901729	-0.103441	0.610812	-0.49224	0.285357	0.198367	0.611256	1.33024
Celiac disease	IL1A	Weighted median	15	1.01485	0.0147416	0.895553	-0.205347	0.23483	0.11229	0.814365	1.26469
Celiac disease	IL1A	Inverse variance weighted	15	1.02099	0.0207717	0.802024	-0.141605	0.183149	0.0828454	0.867964	1.20099
Celiac disease	IL1A	Simple mode	15	1.05317	0.0518076	0.819788	-0.385613	0.489228	0.223174	0.680034	1.63106
Celiac disease	IL1A	Weighted mode	15	0.867127	-0.14257	0.523375	-0.569495	0.284354	0.217819	0.565811	1.3289
Celiac disease	IL1B	MR Egger	13	1.05845	0.0568018	0.746861	-0.279543	0.393146	0.171604	0.75613	1.48163
Celiac disease	IL1B	Weighted median	13	0.913317	-0.0906725	0.347278	-0.279758	0.098413	0.0964722	0.755967	1.10342
Celiac disease	IL1B	Inverse variance weighted	13	0.960401	-0.0404044	0.556179	-0.174965	0.0941564	0.0686535	0.839486	1.09873
Celiac disease	IL1B	Simple mode	13	0.873094	-0.135712	0.364592	-0.417976	0.146552	0.144012	0.658378	1.15784
Celiac disease	IL1B	Weighted mode	13	0.897551	-0.108085	0.281309	-0.295868	0.0796978	0.0958075	0.743886	1.08296
Celiac disease	IL1R1	MR Egger	19	0.992975	-0.00704938	0.95299	-0.237988	0.22389	0.117826	0.788212	1.25093
Celiac disease	IL1R1	Weighted median	19	0.964897	-0.0357335	0.678465	-0.204679	0.133212	0.0861965	0.814909	1.14249
Celiac disease	IL1R1	Inverse variance weighted	19	0.986439	-0.0136542	0.821832	-0.132498	0.10519	0.0606347	0.875904	1.11092
Celiac disease	IL1R1	Simple mode	19	0.864665	-0.145413	0.265857	-0.393603	0.102777	0.126628	0.674622	1.10824
Celiac disease	IL1R1	Weighted mode	19	0.925376	-0.0775552	0.465735	-0.281522	0.126411	0.104064	0.754635	1.13475
Celiac disease	IL1R2	MR Egger	12	0.977817	-0.0224325	0.844378	-0.240678	0.195813	0.11135	0.786095	1.2163
Celiac disease	IL1R2	Weighted median	12	1.04814	0.0470163	0.540813	-0.103661	0.197694	0.0768763	0.901531	1.21859
Celiac disease	IL1R2	Inverse variance weighted	12	1.03202	0.0315186	0.56788	-0.0766378	0.139675	0.0551819	0.926225	1.1499
Celiac disease	IL1R2	Simple mode	12	1.21157	0.191919	0.156147	-0.0551804	0.439018	0.126071	0.946314	1.55118
Celiac disease	IL1R2	Weighted mode	12	1.03913	0.0383813	0.61935	-0.108792	0.185554	0.0750882	0.896917	1.20389
Celiac disease	IL1RAP	MR Egger	13	1.1704	0.157348	0.0580987	0.0115127	0.303184	0.074406	1.01158	1.35416
Celiac disease	IL1RAP	Weighted median	13	1.13022	0.122416	0.0205645	0.018812	0.226021	0.0528594	1.01899	1.2536
Celiac disease	IL1RAP	Inverse variance weighted	13	1.07963	0.0766201	0.173492	-0.0337164	0.186957	0.0562942	0.966846	1.20558
Celiac disease	IL1RAP	Simple mode	13	0.87419	-0.134458	0.439493	-0.464052	0.195135	0.16816	0.628731	1.21548
Celiac disease	IL1RAP	Weighted mode	13	1.1388	0.129979	0.0296439	0.0267216	0.233236	0.0526822	1.02708	1.26268
Celiac disease	IL1RAPL2	MR Egger	13	1.03142	0.0309342	0.874915	-0.345361	0.407229	0.191987	0.707965	1.50265
Celiac disease	IL1RAPL2	Weighted median	13	0.957795	-0.0431212	0.67674	-0.245842	0.1596	0.103429	0.782046	1.17304
Celiac disease	IL1RAPL2	Inverse variance weighted	13	0.975618	-0.0246843	0.761096	-0.183812	0.134443	0.0811874	0.832093	1.1439
Celiac disease	IL1RAPL2	Simple mode	13	0.960248	-0.0405634	0.807516	-0.359764	0.278638	0.162858	0.697841	1.32133
Celiac disease	IL1RAPL2	Weighted mode	13	0.939306	-0.0626136	0.693058	-0.366107	0.24088	0.154844	0.693428	1.27237
Celiac disease	IL1RL1	MR Egger	16	1.00776	0.00773443	0.892633	-0.102557	0.118026	0.0562711	0.902527	1.12527
Celiac disease	IL1RL1	Weighted median	16	0.995057	-0.00495572	0.897611	-0.0804391	0.0705276	0.0385119	0.922711	1.07307
Celiac disease	IL1RL1	Inverse variance weighted	16	0.979086	-0.0211362	0.556429	-0.0915719	0.0492994	0.0359366	0.912496	1.05053
Celiac disease	IL1RL1	Simple mode	16	0.907277	-0.0973076	0.326784	-0.285447	0.0908317	0.0959894	0.751678	1.09508
Celiac disease	IL1RL1	Weighted mode	16	1.00164	0.00163958	0.967831	-0.0767258	0.0800049	0.0399823	0.926144	1.08329
Celiac disease	IL1RL2	MR Egger	11	0.910337	-0.0939399	0.628144	-0.461178	0.273298	0.187366	0.630541	1.31429
Celiac disease	IL1RL2	Weighted median	11	1.01861	0.0184379	0.865572	-0.195039	0.231914	0.108917	0.822803	1.26101
Celiac disease	IL1RL2	Inverse variance weighted	11	1.05141	0.0501341	0.536108	-0.108685	0.208953	0.08103	0.897013	1.23239
Celiac disease	IL1RL2	Simple mode	11	1.02904	0.0286295	0.863549	-0.289589	0.346848	0.162356	0.748571	1.4146
Celiac disease	IL1RL2	Weighted mode	11	1.02246	0.022208	0.854091	-0.208444	0.25286	0.11768	0.811847	1.2877
Celiac disease	IL1RN	MR Egger	15	0.989965	-0.0100859	0.948106	-0.308013	0.287841	0.152004	0.734906	1.33355
Celiac disease	IL1RN	Weighted median	15	1.00747	0.00743909	0.938401	-0.181234	0.196113	0.096262	0.83424	1.21666
Celiac disease	IL1RN	Inverse variance weighted	15	1.02156	0.0213351	0.755178	-0.112771	0.155441	0.0684213	0.893356	1.16817
Celiac disease	IL1RN	Simple mode	15	1.12131	0.114493	0.470792	-0.188247	0.417234	0.154459	0.82841	1.51776
Celiac disease	IL1RN	Weighted mode	15	1.04818	0.0470599	0.689107	-0.178752	0.272872	0.11521	0.836313	1.31373
Celiac disease	IL20	MR Egger	5	1.27021	0.239182	0.672543	-0.765399	1.24376	0.512542	0.465148	3.46864
Celiac disease	IL20	Weighted median	5	1.01048	0.0104218	0.951758	-0.327213	0.348057	0.172263	0.72093	1.41631
Celiac disease	IL20	Inverse variance weighted	5	1.04466	0.0436937	0.792612	-0.282031	0.369418	0.166186	0.75425	1.44689
Celiac disease	IL20	Simple mode	5	0.940384	-0.0614673	0.799319	-0.504927	0.381992	0.226255	0.60355	1.4652
Celiac disease	IL20	Weighted mode	5	0.947713	-0.0537031	0.813282	-0.470986	0.36358	0.2129	0.624386	1.43847
Celiac disease	IL21	MR Egger	7	0.0976725	-2.32613	0.300188	-6.27262	1.62035	2.01351	0.00188728	5.05485
Celiac disease	IL21	Weighted median	7	1.03664	0.0359879	0.862304	-0.370698	0.442673	0.207493	0.690253	1.55686
Celiac disease	IL21	Inverse variance weighted	7	0.200055	-1.60916	0.0202266	-2.06466	-1.15367	0.232396	0.126861	0.315477
Celiac disease	IL21	Simple mode	7	0.990148	-0.00990056	0.982654	-0.866169	0.846368	0.436872	0.42056	2.33116
Celiac disease	IL21	Weighted mode	7	1.3083	0.26873	0.1116	-0.0138374	0.551298	0.144167	0.986258	1.7355
Celiac disease	IL22	MR Egger	16	0.958685	-0.0421928	0.812082	-0.383536	0.29915	0.174155	0.681448	1.34871
Celiac disease	IL22	Weighted median	16	1.05749	0.0558997	0.580931	-0.142575	0.254375	0.101263	0.867122	1.28966
Celiac disease	IL22	Inverse variance weighted	16	0.980692	-0.0194968	0.78514	-0.159666	0.120672	0.0715147	0.852429	1.12825
Celiac disease	IL22	Simple mode	16	1.14664	0.136833	0.50285	-0.253812	0.527477	0.199308	0.775838	1.69465
Celiac disease	IL22	Weighted mode	16	1.18326	0.168274	0.383869	-0.199399	0.535946	0.187588	0.819223	1.70907
Celiac disease	IL2	MR Egger	19	0.948491	-0.0528831	0.749975	-0.372905	0.267139	0.163277	0.68873	1.30622
Celiac disease	IL2	Weighted median	19	1.03653	0.0358812	0.676352	-0.132589	0.204351	0.0859541	0.875825	1.22673
Celiac disease	IL2	Inverse variance weighted	19	1.00147	0.00146788	0.981274	-0.12111	0.124046	0.0625399	0.885936	1.13207
Celiac disease	IL2	Simple mode	19	1.18098	0.16634	0.335178	-0.162897	0.495578	0.167978	0.849679	1.64145
Celiac disease	IL2	Weighted mode	19	1.07491	0.0722331	0.652384	-0.236839	0.381305	0.15769	0.789118	1.46419
Celiac disease	IL24	MR Egger	16	0.709079	-0.343788	0.192881	-0.836364	0.148787	0.251314	0.433283	1.16043
Celiac disease	IL24	Weighted median	16	0.764055	-0.269116	0.00595986	-0.460924	-0.0773084	0.097861	0.630701	0.925604
Celiac disease	IL24	Inverse variance weighted	16	0.794914	-0.229521	0.00899303	-0.377971	-0.0810709	0.0757399	0.68525	0.922128
Celiac disease	IL24	Simple mode	16	0.686711	-0.375842	0.0299777	-0.683115	-0.0685696	0.156772	0.505042	0.933728
Celiac disease	IL24	Weighted mode	16	0.719704	-0.328916	0.0339693	-0.605222	-0.0526094	0.140973	0.545953	0.94875
Celiac disease	IL25	MR Egger	15	1.04812	0.0469957	0.556332	-0.105544	0.199535	0.0778261	0.899835	1.22083
Celiac disease	IL25	Weighted median	15	1.02547	0.0251559	0.601599	-0.0692806	0.119592	0.0481819	0.933065	1.12704
Celiac disease	IL25	Inverse variance weighted	15	1.06167	0.0598403	0.208888	-0.0334943	0.153175	0.0476197	0.96706	1.16553
Celiac disease	IL25	Simple mode	15	0.990393	-0.00965301	0.940274	-0.257677	0.238371	0.126543	0.772845	1.26918
Celiac disease	IL25	Weighted mode	15	1.02642	0.0260735	0.616723	-0.0737653	0.125912	0.0509382	0.92889	1.13418
Celiac disease	IL27	MR Egger	19	0.743081	-0.29695	0.161499	-0.694565	0.100665	0.202865	0.499291	1.10591
Celiac disease	IL27	Weighted median	19	0.926057	-0.0768198	0.420645	-0.263789	0.110149	0.0953924	0.768136	1.11644
Celiac disease	IL27	Inverse variance weighted	19	0.942424	-0.0593	0.38929	-0.194307	0.0757066	0.0688809	0.823405	1.07865
Celiac disease	IL27	Simple mode	19	0.877199	-0.131022	0.431927	-0.450456	0.188412	0.162977	0.637337	1.20733
Celiac disease	IL27	Weighted mode	19	0.916722	-0.0869511	0.508185	-0.33939	0.165488	0.128795	0.712205	1.17997
Celiac disease	IL27RA	MR Egger	12	1.15347	0.142779	0.0319208	0.0304479	0.25511	0.0573117	1.03092	1.2906
Celiac disease	IL27RA	Weighted median	12	1.09719	0.0927492	0.0276226	0.0102158	0.175283	0.0421089	1.01027	1.19158
Celiac disease	IL27RA	Inverse variance weighted	12	1.05773	0.0561239	0.182038	-0.0263057	0.138554	0.0420559	0.974037	1.14861
Celiac disease	IL27RA	Simple mode	12	0.975509	-0.0247957	0.838492	-0.257657	0.208065	0.118807	0.77286	1.23129
Celiac disease	IL27RA	Weighted mode	12	1.08878	0.0850619	0.075157	0.000220995	0.169903	0.0432862	1.00022	1.18519
Celiac disease	IL2RA	MR Egger	8	1.10787	0.102442	0.758084	-0.520336	0.72522	0.317744	0.594321	2.06519
Celiac disease	IL2RA	Weighted median	8	1.17342	0.159918	0.180605	-0.0741854	0.394022	0.119441	0.928499	1.48293
Celiac disease	IL2RA	Inverse variance weighted	8	1.19997	0.182296	0.0614295	-0.00873362	0.373326	0.0974643	0.991304	1.45256
Celiac disease	IL2RA	Simple mode	8	1.18295	0.168014	0.360885	-0.168872	0.504899	0.17188	0.844617	1.65682
Celiac disease	IL2RA	Weighted mode	8	1.18096	0.166326	0.373848	-0.176906	0.509558	0.175118	0.837859	1.66456
Celiac disease	IL2RB	MR Egger	13	1.1467	0.13689	0.778929	-0.795713	1.06949	0.475818	0.451259	2.9139
Celiac disease	IL2RB	Weighted median	13	1.17039	0.157336	0.21408	-0.0908711	0.405542	0.126636	0.913135	1.50012
Celiac disease	IL2RB	Inverse variance weighted	13	1.16563	0.15326	0.152354	-0.0406281	0.347147	0.0989223	0.960186	1.41503
Celiac disease	IL2RB	Simple mode	13	1.4934	0.401059	0.0647858	0.0144	0.787717	0.197275	1.0145	2.19837
Celiac disease	IL2RB	Weighted mode	13	1.25941	0.230646	0.227233	-0.124558	0.58585	0.181227	0.882887	1.79652
Celiac disease	IL31	MR Egger	12	1.1748	0.161101	0.293565	-0.123733	0.445935	0.145323	0.883616	1.56195
Celiac disease	IL31	Weighted median	12	1.06538	0.0633291	0.369735	-0.0750534	0.201712	0.0706033	0.927694	1.2235
Celiac disease	IL31	Inverse variance weighted	12	1.0255	0.0251839	0.672389	-0.0915427	0.14191	0.0595543	0.912522	1.15247
Celiac disease	IL31	Simple mode	12	0.984882	-0.0152338	0.913605	-0.284194	0.253727	0.137225	0.75262	1.28882
Celiac disease	IL31	Weighted mode	12	1.06453	0.0625368	0.406037	-0.07933	0.204404	0.072381	0.923735	1.22679
Celiac disease	IL32	MR Egger	14	1.17034	0.157298	0.468567	-0.254589	0.569184	0.210146	0.775235	1.76683
Celiac disease	IL32	Weighted median	14	1.06115	0.0593563	0.621018	-0.175952	0.294664	0.120055	0.838658	1.34268
Celiac disease	IL32	Inverse variance weighted	14	1.06412	0.0621498	0.503783	-0.120056	0.244356	0.0929622	0.886871	1.2768
Celiac disease	IL32	Simple mode	14	0.988592	-0.0114731	0.941219	-0.310603	0.287656	0.152617	0.733005	1.3333
Celiac disease	IL32	Weighted mode	14	1.02491	0.0246003	0.863815	-0.251002	0.300203	0.140614	0.77802	1.35013
Celiac disease	IL34	MR Egger	19	0.963269	-0.0374222	0.667953	-0.20545	0.130605	0.0857284	0.814281	1.13952
Celiac disease	IL34	Weighted median	19	0.955111	-0.045928	0.494217	-0.177608	0.0857522	0.0671838	0.83727	1.08954
Celiac disease	IL34	Inverse variance weighted	19	0.94382	-0.0578194	0.256052	-0.157598	0.0419594	0.0509076	0.854193	1.04285
Celiac disease	IL34	Simple mode	19	1.0027	0.00269706	0.977885	-0.185373	0.190767	0.095954	0.830794	1.21018
Celiac disease	IL34	Weighted mode	19	0.962588	-0.03813	0.604342	-0.179829	0.103568	0.0722952	0.835413	1.10912
Celiac disease	IL3	MR Egger	9	0.515083	-0.663427	0.0695912	-1.27093	-0.0559214	0.309952	0.28057	0.945613
Celiac disease	IL3	Weighted median	9	1.07215	0.0696629	0.598082	-0.189346	0.328672	0.132148	0.8275	1.38912
Celiac disease	IL3	Inverse variance weighted	9	1.0992	0.0945847	0.38099	-0.117025	0.306195	0.107964	0.889563	1.35825
Celiac disease	IL3	Simple mode	9	1.18206	0.167259	0.43191	-0.228878	0.563396	0.202111	0.795426	1.75663
Celiac disease	IL3	Weighted mode	9	1.02335	0.0230849	0.890103	-0.294128	0.340298	0.161843	0.745181	1.40537
Celiac disease	IL36 alpha	MR Egger	12	0.602549	-0.506586	0.411908	-1.66619	0.653018	0.591635	0.188966	1.92133
Celiac disease	IL36 alpha	Weighted median	12	1.01407	0.0139674	0.864267	-0.146178	0.174113	0.0817068	0.864004	1.19019
Celiac disease	IL36 alpha	Inverse variance weighted	12	1.07581	0.0730779	0.161587	-0.0208424	0.166998	0.0479185	0.979373	1.18175
Celiac disease	IL36 alpha	Simple mode	12	0.941881	-0.0598758	0.620674	-0.29035	0.170598	0.117589	0.748002	1.18601
Celiac disease	IL36 alpha	Weighted mode	12	0.996528	-0.00347831	0.967794	-0.168537	0.161581	0.0842137	0.8449	1.17537
Celiac disease	IL36 beta	MR Egger	15	1.1775	0.16339	0.29056	-0.127285	0.454064	0.148303	0.880483	1.5747
Celiac disease	IL36 beta	Weighted median	15	1.04997	0.0487571	0.640222	-0.155707	0.253221	0.104318	0.85581	1.28817
Celiac disease	IL36 beta	Inverse variance weighted	15	1.06075	0.0589758	0.417764	-0.0836773	0.201629	0.0727822	0.919728	1.22339
Celiac disease	IL36 beta	Simple mode	15	1.13327	0.125103	0.459058	-0.196942	0.447148	0.164309	0.821238	1.56385
Celiac disease	IL36 beta	Weighted mode	15	0.982871	-0.0172775	0.907748	-0.304271	0.269716	0.146425	0.737661	1.30959
Celiac disease	IL36 gamma	MR Egger	10	1.12124	0.114433	0.704085	-0.455255	0.68412	0.290657	0.634286	1.98203
Celiac disease	IL36 gamma	Weighted median	10	0.97707	-0.0231971	0.859082	-0.279284	0.23289	0.130657	0.756325	1.26224
Celiac disease	IL36 gamma	Inverse variance weighted	10	1.07285	0.0703228	0.530849	-0.149608	0.290253	0.112209	0.861046	1.33677
Celiac disease	IL36 gamma	Simple mode	10	0.896573	-0.109175	0.60078	-0.503761	0.28541	0.201319	0.604254	1.33031
Celiac disease	IL36 gamma	Weighted mode	10	0.900235	-0.1051	0.584005	-0.467846	0.257646	0.185074	0.62635	1.29388
Celiac disease	IL37	MR Egger	13	0.89949	-0.105928	0.487115	-0.394675	0.182819	0.14732	0.673899	1.2006
Celiac disease	IL37	Weighted median	13	0.916184	-0.0875378	0.34442	-0.269008	0.0939323	0.0925868	0.764137	1.09849
Celiac disease	IL37	Inverse variance weighted	13	0.950401	-0.0508708	0.453697	-0.183943	0.0822018	0.0678942	0.831983	1.08567
Celiac disease	IL37	Simple mode	13	0.933097	-0.0692458	0.645409	-0.356805	0.218313	0.146714	0.699909	1.24398
Celiac disease	IL37	Weighted mode	13	0.905442	-0.0993319	0.402877	-0.323854	0.125191	0.114552	0.723356	1.13336
Celiac disease	IL3RA	MR Egger	15	0.842184	-0.171757	0.315428	-0.494155	0.150641	0.164489	0.610086	1.16258
Celiac disease	IL3RA	Weighted median	15	0.945973	-0.0555408	0.233729	-0.146958	0.0358762	0.0466413	0.86333	1.03653
Celiac disease	IL3RA	Inverse variance weighted	15	1.04136	0.0405298	0.520028	-0.0793351	0.160395	0.0611556	0.92373	1.17397
Celiac disease	IL3RA	Simple mode	15	0.999507	-0.000493431	0.996651	-0.226819	0.225832	0.115472	0.797065	1.25337
Celiac disease	IL3RA	Weighted mode	15	0.95783	-0.0430851	0.354536	-0.131276	0.0451056	0.0449952	0.876976	1.04614
Celiac disease	IL4	MR Egger	17	0.864431	-0.145684	0.546231	-0.608173	0.316806	0.235964	0.544344	1.37274
Celiac disease	IL4	Weighted median	17	1.0394	0.0386446	0.699288	-0.157438	0.234728	0.100042	0.854329	1.26456
Celiac disease	IL4	Inverse variance weighted	17	1.0667	0.0645655	0.3675	-0.075862	0.204993	0.0716467	0.926944	1.22752
Celiac disease	IL4	Simple mode	17	1.02789	0.0275066	0.873922	-0.306856	0.361869	0.170593	0.735757	1.43601
Celiac disease	IL4	Weighted mode	17	1.02155	0.0213239	0.893163	-0.284964	0.327612	0.156269	0.752041	1.38765
Celiac disease	IL4RA	MR Egger	10	0.924037	-0.079003	0.804845	-0.68525	0.527244	0.30931	0.503964	1.69426
Celiac disease	IL4RA	Weighted median	10	0.913159	-0.0908454	0.482789	-0.344551	0.162861	0.129442	0.708538	1.17687
Celiac disease	IL4RA	Inverse variance weighted	10	0.844125	-0.169455	0.117723	-0.38176	0.0428504	0.108319	0.682659	1.04378
Celiac disease	IL4RA	Simple mode	10	1.06925	0.0669537	0.785232	-0.400431	0.534339	0.238462	0.670031	1.70632
Celiac disease	IL4RA	Weighted mode	10	1.06481	0.0627988	0.786873	-0.379056	0.504654	0.225436	0.684507	1.65641
Celiac disease	IL5	MR Egger	10	1.23709	0.21276	0.515586	-0.400325	0.825845	0.312798	0.670103	2.28381
Celiac disease	IL5	Weighted median	10	1.06771	0.065517	0.568744	-0.159808	0.290842	0.114962	0.852307	1.33755
Celiac disease	IL5	Inverse variance weighted	10	1.06883	0.0665687	0.488715	-0.121882	0.255019	0.0961484	0.885253	1.29049
Celiac disease	IL5	Simple mode	10	1.03047	0.0300114	0.872501	-0.326235	0.386258	0.181759	0.721635	1.47146
Celiac disease	IL5	Weighted mode	10	1.05583	0.054324	0.74453	-0.262513	0.371161	0.161651	0.769117	1.44942
Celiac disease	IL5RA	MR Egger	9	2.44518	0.894119	0.621278	-2.49749	4.28573	1.73041	0.0822916	72.6552
Celiac disease	IL5RA	Weighted median	9	1.04686	0.0457981	0.738149	-0.222712	0.314308	0.136995	0.800346	1.36931
Celiac disease	IL5RA	Inverse variance weighted	9	0.99139	-0.0086477	0.902063	-0.139603	0.122308	0.0668139	0.869704	1.1301
Celiac disease	IL5RA	Simple mode	9	1.04062	0.0398137	0.814512	-0.282011	0.361638	0.164196	0.754265	1.43568
Celiac disease	IL5RA	Weighted mode	9	1.02654	0.0261912	0.850291	-0.237129	0.289512	0.134347	0.788889	1.33577
Celiac disease	IL6	MR Egger	13	0.971133	-0.0292921	0.847625	-0.321124	0.26254	0.148894	0.725333	1.30023
Celiac disease	IL6	Weighted median	13	0.817343	-0.201697	0.0700145	-0.41989	0.0164962	0.111323	0.657119	1.01663
Celiac disease	IL6	Inverse variance weighted	13	0.828687	-0.187913	0.0158657	-0.340612	-0.0352136	0.0779079	0.711335	0.965399
Celiac disease	IL6	Simple mode	13	0.761872	-0.271976	0.16713	-0.634465	0.0905122	0.184943	0.530219	1.09473
Celiac disease	IL6	Weighted mode	13	0.777639	-0.251493	0.17136	-0.590304	0.0873181	0.172863	0.554159	1.09124
Celiac disease	IL6RA	MR Egger	9	0.94338	-0.0582862	0.394627	-0.184261	0.0676886	0.0642728	0.831719	1.07003
Celiac disease	IL6RA	Weighted median	9	0.974537	-0.0257926	0.510579	-0.102629	0.0510439	0.0392023	0.902462	1.05237
Celiac disease	IL6RA	Inverse variance weighted	9	0.989164	-0.0108947	0.765322	-0.0824314	0.0606419	0.0364983	0.920875	1.06252
Celiac disease	IL6RA	Simple mode	9	1.06799	0.0657771	0.53952	-0.135388	0.266942	0.102635	0.873377	1.30597
Celiac disease	IL6RA	Weighted mode	9	0.977189	-0.0230756	0.569904	-0.099415	0.0532638	0.0389486	0.905367	1.05471
Celiac disease	IL6RB	MR Egger	14	1.12773	0.120207	0.545465	-0.258471	0.498885	0.193203	0.772231	1.64688
Celiac disease	IL6RB	Weighted median	14	0.868227	-0.141302	0.123931	-0.321317	0.0387141	0.0918447	0.725193	1.03947
Celiac disease	IL6RB	Inverse variance weighted	14	0.971184	-0.0292389	0.662432	-0.160512	0.102034	0.0669759	0.851708	1.10742
Celiac disease	IL6RB	Simple mode	14	0.822821	-0.195016	0.228715	-0.497614	0.107582	0.154387	0.607979	1.11358
Celiac disease	IL6RB	Weighted mode	14	0.836743	-0.178238	0.156251	-0.410375	0.0538998	0.118438	0.663401	1.05538
Celiac disease	IL7	MR Egger	18	0.937086	-0.0649798	0.644838	-0.336075	0.206116	0.138314	0.714569	1.2289
Celiac disease	IL7	Weighted median	18	1.00623	0.00620912	0.945595	-0.17213	0.184549	0.0909895	0.841869	1.20268
Celiac disease	IL7	Inverse variance weighted	18	1.01789	0.0177317	0.792624	-0.114461	0.149925	0.0674453	0.891847	1.16175
Celiac disease	IL7	Simple mode	18	1.02822	0.0278338	0.84403	-0.245251	0.300919	0.139329	0.782508	1.3511
Celiac disease	IL7	Weighted mode	18	0.991977	-0.00805555	0.944442	-0.2313	0.215189	0.1139	0.793502	1.2401
Celiac disease	IL7RA	MR Egger	13	1.02544	0.0251204	0.885119	-0.307842	0.358083	0.169879	0.735031	1.43058
Celiac disease	IL7RA	Weighted median	13	0.933608	-0.0686987	0.444648	-0.244857	0.107459	0.0898765	0.782817	1.11345
Celiac disease	IL7RA	Inverse variance weighted	13	1.03019	0.029739	0.644942	-0.0967549	0.156233	0.0645377	0.907779	1.1691
Celiac disease	IL7RA	Simple mode	13	0.907347	-0.0972301	0.55699	-0.412664	0.218204	0.160936	0.661885	1.24384
Celiac disease	IL7RA	Weighted mode	13	0.894704	-0.111263	0.36053	-0.340655	0.11813	0.117037	0.711304	1.12539
Celiac disease	IL9	MR Egger	11	1.05787	0.0562616	0.845035	-0.491883	0.604406	0.279666	0.611474	1.83017
Celiac disease	IL9	Weighted median	11	0.995265	-0.00474634	0.973286	-0.282553	0.27306	0.141738	0.753857	1.31398
Celiac disease	IL9	Inverse variance weighted	11	1.01431	0.0142064	0.894887	-0.19654	0.224953	0.107524	0.821568	1.25226
Celiac disease	IL9	Simple mode	11	1.18383	0.168758	0.506664	-0.311505	0.64902	0.245032	0.732344	1.91366
Celiac disease	IL9	Weighted mode	11	1.01882	0.0186454	0.931106	-0.39357	0.43086	0.210314	0.674644	1.53858
Celiac disease	IL8	MR Egger	15	1.2194	0.198361	0.411241	-0.259572	0.656294	0.233639	0.771381	1.92763
Celiac disease	IL8	Weighted median	15	0.987722	-0.012354	0.90018	-0.205395	0.180687	0.0984901	0.814326	1.19804
Celiac disease	IL8	Inverse variance weighted	15	1.02276	0.0225012	0.805843	-0.156928	0.201931	0.0915456	0.854765	1.22376
Celiac disease	IL8	Simple mode	15	0.988998	-0.011063	0.954418	-0.383679	0.361553	0.19011	0.68135	1.43556
Celiac disease	IL8	Weighted mode	15	0.978905	-0.0213203	0.892313	-0.324434	0.281793	0.15465	0.722937	1.3255
Celiac disease	ILF3	MR Egger	7	1.23026	0.207222	0.627827	-0.579839	0.994284	0.401562	0.559988	2.70279
Celiac disease	ILF3	Weighted median	7	1.08897	0.085236	0.608583	-0.240996	0.411468	0.166445	0.785845	1.50903
Celiac disease	ILF3	Inverse variance weighted	7	1.02094	0.0207238	0.868794	-0.225167	0.266614	0.125454	0.798383	1.30554
Celiac disease	ILF3	Simple mode	7	1.15781	0.146534	0.588958	-0.356769	0.649837	0.256787	0.699934	1.91523
Celiac disease	ILF3	Weighted mode	7	1.11473	0.108613	0.633752	-0.315706	0.532931	0.216489	0.729274	1.70392
Celiac disease	TIRAP	MR Egger	14	0.948538	-0.0528339	0.511806	-0.206002	0.100334	0.0781468	0.813832	1.10554
Celiac disease	TIRAP	Weighted median	14	0.936608	-0.0654905	0.294793	-0.188012	0.057031	0.062511	0.828605	1.05869
Celiac disease	TIRAP	Inverse variance weighted	14	1.01236	0.012285	0.793619	-0.0797535	0.104323	0.0469584	0.923344	1.10996
Celiac disease	TIRAP	Simple mode	14	0.978055	-0.0221891	0.868966	-0.280657	0.236279	0.131871	0.755287	1.26653
Celiac disease	TIRAP	Weighted mode	14	0.942051	-0.0596959	0.3711	-0.185991	0.0665988	0.0644361	0.830281	1.06887

## Sheet: if_ibd
Odds Ratios and Confidence Intervals for Inflammatory Cytokines in Relation to Inflammatory Bowel Disease
Autoimmune diseases	inflammatory_factors	inflammatory_factors	nsnp	OR	beta	Pval	lo_ci	up_ci	se	or_lci95	or_uci95
Inflammatory bowel disease	MCSF	MR Egger	8	1.05248	0.0511493	0.531532	-0.099898	0.202197	0.077065	0.90493	1.22409
Inflammatory bowel disease	MCSF	Weighted median	8	1.0404	0.0396056	0.423425	-0.0573683	0.136579	0.0494765	0.944246	1.14635
Inflammatory bowel disease	MCSF	Inverse variance weighted	8	1.0227	0.0224425	0.560688	-0.0531603	0.0980452	0.0385728	0.948228	1.10301
Inflammatory bowel disease	MCSF	Simple mode	8	1.09249	0.0884612	0.295374	-0.0648621	0.241784	0.0782262	0.937197	1.27352
Inflammatory bowel disease	MCSF	Weighted mode	8	1.09023	0.0863888	0.310953	-0.0686566	0.241434	0.0791048	0.933647	1.27307
Inflammatory bowel disease	GCSF	MR Egger	6	0.914671	-0.0891908	0.643808	-0.439338	0.260956	0.178646	0.644463	1.29817
Inflammatory bowel disease	GCSF	Weighted median	6	0.965764	-0.0348362	0.622646	-0.173586	0.103913	0.0707905	0.840645	1.1095
Inflammatory bowel disease	GCSF	Inverse variance weighted	6	0.901439	-0.103762	0.178735	-0.255008	0.0474834	0.0771662	0.77491	1.04863
Inflammatory bowel disease	GCSF	Simple mode	6	0.984211	-0.0159154	0.878796	-0.210313	0.178482	0.0991823	0.810331	1.1954
Inflammatory bowel disease	GCSF	Weighted mode	6	0.99754	-0.00246255	0.976073	-0.155582	0.150657	0.0781223	0.855917	1.1626
Inflammatory bowel disease	GCSFR	MR Egger	7	0.983529	-0.0166085	0.941608	-0.439354	0.406137	0.215686	0.644453	1.50101
Inflammatory bowel disease	GCSFR	Weighted median	7	0.99965	-0.000350414	0.995565	-0.123921	0.12322	0.0630462	0.88345	1.13113
Inflammatory bowel disease	GCSFR	Inverse variance weighted	7	1.05688	0.0553198	0.351683	-0.0476347	0.158274	0.0525278	0.953482	1.17149
Inflammatory bowel disease	GCSFR	Simple mode	7	0.988655	-0.0114103	0.916719	-0.216494	0.193673	0.104634	0.805337	1.2137
Inflammatory bowel disease	GCSFR	Weighted mode	7	0.996098	-0.00391012	0.968305	-0.188938	0.181117	0.0944018	0.827838	1.19856
Inflammatory bowel disease	GM-CSF	MR Egger	8	0.992596	-0.00743168	0.945949	-0.213513	0.19865	0.105144	0.807741	1.21976
Inflammatory bowel disease	GM-CSF	Weighted median	8	0.967808	-0.0327211	0.49212	-0.126082	0.0606397	0.0476331	0.881543	1.06252
Inflammatory bowel disease	GM-CSF	Inverse variance weighted	8	0.947381	-0.0540539	0.155318	-0.128611	0.0205035	0.0380395	0.879316	1.02072
Inflammatory bowel disease	GM-CSF	Simple mode	8	0.977863	-0.0223859	0.759132	-0.159987	0.115215	0.0702046	0.852155	1.12211
Inflammatory bowel disease	GM-CSF	Weighted mode	8	0.970506	-0.0299373	0.680116	-0.166392	0.106518	0.0696199	0.846714	1.1124
Inflammatory bowel disease	CSF2RA	MR Egger	11	1.18385	0.168772	0.0787556	0.00190643	0.335638	0.0851355	1.00191	1.39883
Inflammatory bowel disease	CSF2RA	Weighted median	11	0.967911	-0.032615	0.496307	-0.12658	0.0613499	0.0479413	0.881104	1.06327
Inflammatory bowel disease	CSF2RA	Inverse variance weighted	11	0.971039	-0.0293887	0.436997	-0.103496	0.0447189	0.03781	0.901679	1.04573
Inflammatory bowel disease	CSF2RA	Simple mode	11	0.966559	-0.0340125	0.697483	-0.200625	0.1326	0.0850061	0.81822	1.14179
Inflammatory bowel disease	CSF2RA	Weighted mode	11	0.953811	-0.0472896	0.578469	-0.208688	0.114109	0.0823463	0.811648	1.12087
Inflammatory bowel disease	CXCL10	MR Egger	6	1.05693	0.0553732	0.739658	-0.249287	0.360034	0.155439	0.779356	1.43338
Inflammatory bowel disease	CXCL10	Weighted median	6	0.986463	-0.0136293	0.819262	-0.13054	0.103282	0.0596484	0.877621	1.1088
Inflammatory bowel disease	CXCL10	Inverse variance weighted	6	1.04254	0.0416574	0.437414	-0.0634829	0.146798	0.053643	0.93849	1.15812
Inflammatory bowel disease	CXCL10	Simple mode	6	0.982517	-0.0176378	0.84293	-0.183295	0.14802	0.0845191	0.832522	1.15954
Inflammatory bowel disease	CXCL10	Weighted mode	6	0.982517	-0.0176378	0.846483	-0.187196	0.15192	0.0865091	0.829281	1.16407
Inflammatory bowel disease	CXCL11	MR Egger	11	0.843383	-0.170334	0.26613	-0.451921	0.111252	0.143667	0.636404	1.11768
Inflammatory bowel disease	CXCL11	Weighted median	11	1.10232	0.0974175	0.0189213	0.016066	0.178769	0.0415059	1.0162	1.19574
Inflammatory bowel disease	CXCL11	Inverse variance weighted	11	1.03684	0.0361748	0.311533	-0.0299526	0.102302	0.0337385	0.970492	1.10772
Inflammatory bowel disease	CXCL11	Simple mode	11	1.08285	0.0796004	0.283432	-0.0580365	0.217237	0.0702229	0.943616	1.24264
Inflammatory bowel disease	CXCL11	Weighted mode	11	1.11014	0.104483	0.059968	0.00791057	0.201055	0.0492714	1.00794	1.22269
Inflammatory bowel disease	CXCL5	MR Egger	11	0.97985	-0.0203559	0.8762	-0.269278	0.228567	0.127001	0.763931	1.2568
Inflammatory bowel disease	CXCL5	Weighted median	11	0.981781	-0.0183865	0.712479	-0.116174	0.0794012	0.0498917	0.89032	1.08264
Inflammatory bowel disease	CXCL5	Inverse variance weighted	11	1.02214	0.0218976	0.569362	-0.0507813	0.0945766	0.0370811	0.950487	1.09919
Inflammatory bowel disease	CXCL5	Simple mode	11	0.960832	-0.0399558	0.650145	-0.207461	0.12755	0.085462	0.812645	1.13604
Inflammatory bowel disease	CXCL5	Weighted mode	11	0.949162	-0.0521757	0.569962	-0.226273	0.121922	0.0888253	0.7975	1.12967
Inflammatory bowel disease	CXCL13	MR Egger	14	0.766532	-0.265879	0.0641411	-0.521499	-0.0102599	0.130418	0.59363	0.989793
Inflammatory bowel disease	CXCL13	Weighted median	14	0.990775	-0.00926754	0.831244	-0.0945039	0.0759688	0.043488	0.909824	1.07893
Inflammatory bowel disease	CXCL13	Inverse variance weighted	14	0.966841	-0.0337213	0.282774	-0.0922447	0.024802	0.0298589	0.911882	1.02511
Inflammatory bowel disease	CXCL13	Simple mode	14	1.01267	0.0125881	0.84337	-0.109812	0.134989	0.0624492	0.896002	1.14452
Inflammatory bowel disease	CXCL13	Weighted mode	14	1.01267	0.0125881	0.830427	-0.100327	0.125503	0.0576097	0.904542	1.13372
Inflammatory bowel disease	CXCL14	MR Egger	9	1.04502	0.0440358	0.670924	-0.150662	0.238734	0.0993358	0.860138	1.26964
Inflammatory bowel disease	CXCL14	Weighted median	9	0.978728	-0.0215019	0.65852	-0.116859	0.0738549	0.0486514	0.889711	1.07665
Inflammatory bowel disease	CXCL14	Inverse variance weighted	9	0.9527	-0.0484548	0.186068	-0.120278	0.023368	0.0366443	0.886674	1.02364
Inflammatory bowel disease	CXCL14	Simple mode	9	1.00018	0.000179787	0.9982	-0.151201	0.151561	0.0772353	0.859674	1.16365
Inflammatory bowel disease	CXCL14	Weighted mode	9	1.00848	0.00844542	0.911647	-0.136096	0.152987	0.0737455	0.872759	1.16531
Inflammatory bowel disease	CXCL9	MR Egger	11	1.12906	0.121385	0.245097	-0.069941	0.312712	0.0976156	0.932449	1.36713
Inflammatory bowel disease	CXCL9	Weighted median	11	0.991726	-0.00830874	0.857021	-0.0986975	0.08208	0.0461167	0.906017	1.08554
Inflammatory bowel disease	CXCL9	Inverse variance weighted	11	1.03727	0.0365941	0.403567	-0.0492759	0.122464	0.0438112	0.951918	1.13028
Inflammatory bowel disease	CXCL9	Simple mode	11	1.01888	0.0187055	0.810655	-0.130328	0.167739	0.0760376	0.877807	1.18263
Inflammatory bowel disease	CXCL9	Weighted mode	11	1.00932	0.00927348	0.901509	-0.133919	0.152466	0.0730574	0.874661	1.1647
Inflammatory bowel disease	CXCL16	MR Egger	4	1.99381	0.690048	0.419	-0.649021	2.02912	0.683199	0.522557	7.60737
Inflammatory bowel disease	CXCL16	Weighted median	4	0.972897	-0.0274769	0.637	-0.141585	0.0866307	0.0582182	0.867982	1.09049
Inflammatory bowel disease	CXCL16	Inverse variance weighted	4	0.985623	-0.0144812	0.845	-0.159492	0.130529	0.0739849	0.852577	1.13943
Inflammatory bowel disease	CXCL16	Simple mode	4	0.909829	-0.0944981	0.468	-0.317852	0.128856	0.113956	0.72771	1.13753
Inflammatory bowel disease	CXCL16	Weighted mode	4	0.914771	-0.0890821	0.487	-0.309951	0.131787	0.112688	0.733483	1.14086
Inflammatory bowel disease	CCL1	MR Egger	14	1.12399	0.116883	0.160927	-0.0364293	0.270195	0.0782204	0.964226	1.31022
Inflammatory bowel disease	CCL1	Weighted median	14	0.989226	-0.0108327	0.796775	-0.0932798	0.0716144	0.0420649	0.910939	1.07424
Inflammatory bowel disease	CCL1	Inverse variance weighted	14	1.03561	0.0349933	0.341954	-0.0371797	0.107166	0.036823	0.963503	1.11312
Inflammatory bowel disease	CCL1	Simple mode	14	0.933561	-0.0687493	0.406114	-0.225689	0.0881903	0.0800712	0.797966	1.0922
Inflammatory bowel disease	CCL1	Weighted mode	14	0.932083	-0.0703334	0.393804	-0.226633	0.0859668	0.079745	0.797213	1.08977
Inflammatory bowel disease	CCL13	MR Egger	15	0.934384	-0.0678678	0.393999	-0.218753	0.083017	0.0769821	0.80352	1.08656
Inflammatory bowel disease	CCL13	Weighted median	15	1.00787	0.0078391	0.841814	-0.069148	0.0848263	0.0392792	0.933189	1.08853
Inflammatory bowel disease	CCL13	Inverse variance weighted	15	0.996945	-0.00305928	0.913333	-0.0581533	0.0520347	0.0281092	0.943505	1.05341
Inflammatory bowel disease	CCL13	Simple mode	15	0.981573	-0.0185991	0.791657	-0.153985	0.116787	0.0690747	0.857284	1.12388
Inflammatory bowel disease	CCL13	Weighted mode	15	1.01211	0.0120333	0.866756	-0.125981	0.150047	0.0704154	0.881632	1.16189
Inflammatory bowel disease	CCL17	MR Egger	5	0.994646	-0.00536838	0.931	-0.117654	0.106917	0.0572885	0.889004	1.11284
Inflammatory bowel disease	CCL17	Weighted median	5	1.03627	0.0356322	0.261	-0.026492	0.0977564	0.031696	0.973856	1.10269
Inflammatory bowel disease	CCL17	Inverse variance weighted	5	1.03091	0.0304375	0.268	-0.0233781	0.084253	0.0274569	0.976893	1.0879
Inflammatory bowel disease	CCL17	Simple mode	5	1.03199	0.0314937	0.523	-0.0568539	0.119841	0.0450753	0.944732	1.12732
Inflammatory bowel disease	CCL17	Weighted mode	5	1.03405	0.0334851	0.437	-0.0426481	0.109618	0.0388435	0.958249	1.11585
Inflammatory bowel disease	CCL3	MR Egger	11	0.994336	-0.00568017	0.954587	-0.195815	0.184455	0.0970077	0.822164	1.20256
Inflammatory bowel disease	CCL3	Weighted median	11	0.891013	-0.115397	0.0121028	-0.205538	-0.025255	0.0459906	0.814209	0.975061
Inflammatory bowel disease	CCL3	Inverse variance weighted	11	0.904116	-0.100797	0.00244334	-0.165994	-0.035601	0.0332635	0.847051	0.965025
Inflammatory bowel disease	CCL3	Simple mode	11	0.858715	-0.152318	0.0612	-0.29391	-0.0107253	0.0722411	0.745343	0.989332
Inflammatory bowel disease	CCL3	Weighted mode	11	0.868257	-0.141268	0.0884206	-0.287959	0.00542364	0.0748426	0.749792	1.00544
Inflammatory bowel disease	CCL20	MR Egger	8	1.1133	0.107332	0.491591	-0.179944	0.394609	0.14657	0.835317	1.4838
Inflammatory bowel disease	CCL20	Weighted median	8	1.00818	0.00814706	0.872364	-0.0912465	0.107541	0.050711	0.912793	1.11354
Inflammatory bowel disease	CCL20	Inverse variance weighted	8	1.02384	0.0235608	0.535651	-0.0509935	0.0981151	0.0380379	0.950285	1.10309
Inflammatory bowel disease	CCL20	Simple mode	8	1.01253	0.012453	0.872539	-0.134221	0.159127	0.0748337	0.874397	1.17249
Inflammatory bowel disease	CCL20	Weighted mode	8	1.00686	0.00683832	0.933685	-0.148565	0.162242	0.0792876	0.861944	1.17614
Inflammatory bowel disease	CCL22	MR Egger	12	1.03523	0.0346197	0.541032	-0.0726008	0.14184	0.0547043	0.929972	1.15239
Inflammatory bowel disease	CCL22	Weighted median	12	1.04412	0.0431777	0.237835	-0.0285159	0.114871	0.0365784	0.971887	1.12173
Inflammatory bowel disease	CCL22	Inverse variance weighted	12	1.07573	0.0729984	0.00654763	0.0203776	0.125619	0.0268474	1.02059	1.13385
Inflammatory bowel disease	CCL22	Simple mode	12	1.05193	0.0506219	0.47778	-0.0843895	0.185633	0.0688833	0.919073	1.20398
Inflammatory bowel disease	CCL22	Weighted mode	12	1.02812	0.0277271	0.608383	-0.0753147	0.130769	0.0525723	0.927452	1.1397
Inflammatory bowel disease	CCL5	MR Egger	14	1.05372	0.05233	0.658628	-0.174085	0.278745	0.115518	0.840226	1.32147
Inflammatory bowel disease	CCL5	Weighted median	14	1.00046	0.000458991	0.990873	-0.0781806	0.0790986	0.0401222	0.924797	1.08231
Inflammatory bowel disease	CCL5	Inverse variance weighted	14	0.993584	-0.0064371	0.861555	-0.0772461	0.0643719	0.036127	0.925662	1.06649
Inflammatory bowel disease	CCL5	Simple mode	14	0.990965	-0.00907652	0.894146	-0.140185	0.122032	0.0668922	0.869197	1.12979
Inflammatory bowel disease	CCL5	Weighted mode	14	1.00949	0.00944301	0.868021	-0.0997573	0.118643	0.0557145	0.905057	1.12597
Inflammatory bowel disease	CCL7	MR Egger	17	1.04819	0.0470646	0.189748	-0.0200921	0.114221	0.0342636	0.980108	1.121
Inflammatory bowel disease	CCL7	Weighted median	17	1.03358	0.0330311	0.223845	-0.0201937	0.0862559	0.0271555	0.980009	1.09009
Inflammatory bowel disease	CCL7	Inverse variance weighted	17	1.02386	0.023575	0.228226	-0.0147729	0.0619229	0.0195653	0.985336	1.06388
Inflammatory bowel disease	CCL7	Simple mode	17	1.02651	0.0261616	0.564629	-0.0610186	0.113342	0.0444797	0.940806	1.12001
Inflammatory bowel disease	CCL7	Weighted mode	17	1.03202	0.0315193	0.273902	-0.0230059	0.0860445	0.027819	0.977257	1.08985
Inflammatory bowel disease	CCL8	MR Egger	12	1.02276	0.0225065	0.858755	-0.219064	0.264077	0.12325	0.80327	1.30223
Inflammatory bowel disease	CCL8	Weighted median	12	1.0233	0.0230342	0.602757	-0.0637136	0.109782	0.0442591	0.938274	1.11603
Inflammatory bowel disease	CCL8	Inverse variance weighted	12	1.00709	0.00706509	0.858452	-0.0705797	0.0847099	0.0396147	0.931853	1.0884
Inflammatory bowel disease	CCL8	Simple mode	12	0.91315	-0.0908548	0.320468	-0.26201	0.0803003	0.087324	0.769503	1.08361
Inflammatory bowel disease	CCL8	Weighted mode	12	1.04475	0.0437767	0.607941	-0.118707	0.20626	0.0828998	0.888068	1.22907
Inflammatory bowel disease	TGFA	MR Egger	6	0.968946	-0.0315469	0.842979	-0.324168	0.261074	0.149296	0.723129	1.29832
Inflammatory bowel disease	TGFA	Weighted median	6	1.02392	0.0236395	0.696484	-0.0951425	0.142422	0.0606031	0.909243	1.15306
Inflammatory bowel disease	TGFA	Inverse variance weighted	6	1.03355	0.0329982	0.514259	-0.0661654	0.132162	0.0505937	0.935976	1.14129
Inflammatory bowel disease	TGFA	Simple mode	6	0.990088	-0.00996177	0.916169	-0.186358	0.166434	0.0899979	0.829977	1.18109
Inflammatory bowel disease	TGFA	Weighted mode	6	0.988123	-0.0119478	0.89599	-0.18224	0.158344	0.0868838	0.833401	1.17157
Inflammatory bowel disease	TGFB1	MR Egger	7	1.17626	0.162344	0.137394	-0.0176838	0.342372	0.091851	0.982472	1.40828
Inflammatory bowel disease	TGFB1	Weighted median	7	0.976379	-0.0239049	0.705271	-0.147786	0.0999759	0.0632045	0.862616	1.10514
Inflammatory bowel disease	TGFB1	Inverse variance weighted	7	0.959448	-0.0413971	0.438209	-0.146062	0.0632675	0.0534003	0.864104	1.06531
Inflammatory bowel disease	TGFB1	Simple mode	7	1.03317	0.032634	0.758305	-0.165947	0.231215	0.101317	0.847091	1.26013
Inflammatory bowel disease	TGFB1	Weighted mode	7	1.0053	0.00528703	0.959906	-0.192448	0.203022	0.100885	0.824937	1.2251
Inflammatory bowel disease	TGFB2	MR Egger	12	1.07285	0.0703206	0.517932	-0.135345	0.275986	0.104931	0.873415	1.31783
Inflammatory bowel disease	TGFB2	Weighted median	12	0.991325	-0.00871282	0.83884	-0.0926807	0.075255	0.0428407	0.911485	1.07816
Inflammatory bowel disease	TGFB2	Inverse variance weighted	12	0.992714	-0.0073126	0.818833	-0.0698881	0.0552629	0.0319263	0.932498	1.05682
Inflammatory bowel disease	TGFB2	Simple mode	12	0.962734	-0.0379784	0.619473	-0.183658	0.107701	0.0743264	0.83222	1.11372
Inflammatory bowel disease	TGFB2	Weighted mode	12	0.965059	-0.0355664	0.618899	-0.171768	0.100636	0.0694908	0.842174	1.10587
Inflammatory bowel disease	TGFB3	MR Egger	11	1.08044	0.0773669	0.362133	-0.0805901	0.235324	0.0805903	0.922572	1.26532
Inflammatory bowel disease	TGFB3	Weighted median	11	1.09269	0.0886444	0.0434798	0.00259344	0.174695	0.0439035	1.0026	1.19088
Inflammatory bowel disease	TGFB3	Inverse variance weighted	11	1.06124	0.0594406	0.0525919	-0.000666791	0.119548	0.030667	0.999333	1.12699
Inflammatory bowel disease	TGFB3	Simple mode	11	1.14369	0.134257	0.136367	-0.0282081	0.296722	0.0828902	0.972186	1.34544
Inflammatory bowel disease	TGFB3	Weighted mode	11	1.14767	0.137735	0.144419	-0.032762	0.308231	0.0869881	0.967769	1.36102
Inflammatory bowel disease	IL10	MR Egger	7	1.19686	0.179699	0.166102	-0.0376798	0.397078	0.110907	0.963021	1.48747
Inflammatory bowel disease	IL10	Weighted median	7	0.999999	-5.46e-07	0.999992	-0.112383	0.112382	0.0573379	0.893702	1.11894
Inflammatory bowel disease	IL10	Inverse variance weighted	7	1.03078	0.0303139	0.570747	-0.0744839	0.135112	0.0534683	0.928222	1.14466
Inflammatory bowel disease	IL10	Simple mode	7	0.987418	-0.0126616	0.889159	-0.183344	0.158021	0.087083	0.832481	1.17119
Inflammatory bowel disease	IL10	Weighted mode	7	0.984532	-0.0155891	0.87664	-0.204223	0.173045	0.0962418	0.815281	1.18892
Inflammatory bowel disease	IL10RB	MR Egger	11	1.04781	0.0467	0.589408	-0.116868	0.210268	0.0834531	0.889703	1.23401
Inflammatory bowel disease	IL10RB	Weighted median	11	1.02561	0.0252855	0.583104	-0.0650106	0.115582	0.0460694	0.937058	1.12253
Inflammatory bowel disease	IL10RB	Inverse variance weighted	11	1.04242	0.0415444	0.223142	-0.0252968	0.108386	0.0341027	0.97502	1.11448
Inflammatory bowel disease	IL10RB	Simple mode	11	1.00884	0.00880548	0.911632	-0.142825	0.160436	0.0773624	0.866906	1.17402
Inflammatory bowel disease	IL10RB	Weighted mode	11	1.01188	0.0118097	0.875122	-0.131754	0.155374	0.0732469	0.876556	1.16809
Inflammatory bowel disease	IL11	MR Egger	12	0.9417	-0.0600683	0.592607	-0.273084	0.152947	0.108682	0.761029	1.16526
Inflammatory bowel disease	IL11	Weighted median	12	0.937193	-0.0648662	0.177182	-0.159078	0.029346	0.0480675	0.852929	1.02978
Inflammatory bowel disease	IL11	Inverse variance weighted	12	1.00102	0.00101849	0.981135	-0.0834018	0.0854388	0.0430716	0.919981	1.08919
Inflammatory bowel disease	IL11	Simple mode	12	0.903401	-0.101589	0.272047	-0.273786	0.0706078	0.0878555	0.760495	1.07316
Inflammatory bowel disease	IL11	Weighted mode	12	0.906592	-0.098063	0.233057	-0.250366	0.0542397	0.0777055	0.778516	1.05574
Inflammatory bowel disease	IL11RA	MR Egger	9	0.978789	-0.0214387	0.730515	-0.138639	0.0957612	0.0597959	0.870543	1.1005
Inflammatory bowel disease	IL11RA	Weighted median	9	1.02973	0.0292952	0.466254	-0.0495128	0.108103	0.0402082	0.951693	1.11416
Inflammatory bowel disease	IL11RA	Inverse variance weighted	9	1.0409	0.0400845	0.180405	-0.0185681	0.098737	0.0299248	0.981603	1.10378
Inflammatory bowel disease	IL11RA	Simple mode	9	1.07319	0.0706351	0.262432	-0.0442034	0.185474	0.0585911	0.956759	1.20379
Inflammatory bowel disease	IL11RA	Weighted mode	9	1.00844	0.00840349	0.863426	-0.0843205	0.101127	0.0473082	0.919137	1.10642
Inflammatory bowel disease	IL12	MR Egger	13	0.94526	-0.0562955	0.672959	-0.310767	0.198176	0.129832	0.732885	1.21918
Inflammatory bowel disease	IL12	Weighted median	13	1.01325	0.0131649	0.750445	-0.0679639	0.0942937	0.0413922	0.934294	1.09888
Inflammatory bowel disease	IL12	Inverse variance weighted	13	0.989262	-0.0107958	0.728328	-0.0717136	0.050122	0.0310805	0.930797	1.0514
Inflammatory bowel disease	IL12	Simple mode	13	1.03213	0.0316201	0.645884	-0.0998808	0.163121	0.0670923	0.904945	1.17718
Inflammatory bowel disease	IL12	Weighted mode	13	1.02428	0.023986	0.723447	-0.105785	0.153757	0.0662095	0.899618	1.16621
Inflammatory bowel disease	IL23	MR Egger	14	1.39711	0.334408	0.102207	-0.0360189	0.704835	0.188993	0.964622	2.02351
Inflammatory bowel disease	IL23	Weighted median	14	0.96104	-0.0397393	0.330771	-0.119826	0.0403471	0.0408604	0.887075	1.04117
Inflammatory bowel disease	IL23	Inverse variance weighted	14	1.10817	0.102706	0.183214	-0.0485453	0.253957	0.077169	0.952614	1.28912
Inflammatory bowel disease	IL23	Simple mode	14	0.939986	-0.0618901	0.34035	-0.184448	0.0606678	0.0625295	0.831563	1.06255
Inflammatory bowel disease	IL23	Weighted mode	14	0.929385	-0.0732318	0.218161	-0.184149	0.0376858	0.0565906	0.831812	1.0384
Inflammatory bowel disease	IL13	MR Egger	13	1.03623	0.0355847	0.609899	-0.0972264	0.168396	0.0677608	0.907351	1.1834
Inflammatory bowel disease	IL13	Weighted median	13	1.01548	0.0153615	0.709703	-0.06552	0.096243	0.0412661	0.93658	1.10103
Inflammatory bowel disease	IL13	Inverse variance weighted	13	1.04094	0.0401264	0.172082	-0.017468	0.0977208	0.0293849	0.982684	1.10265
Inflammatory bowel disease	IL13	Simple mode	13	0.999836	-0.000164071	0.998271	-0.14547	0.145142	0.0741358	0.864616	1.1562
Inflammatory bowel disease	IL13	Weighted mode	13	1.00107	0.00107319	0.988746	-0.144977	0.147124	0.0745156	0.865042	1.1585
Inflammatory bowel disease	IL16	MR Egger	16	0.931943	-0.0704836	0.111085	-0.151711	0.0107437	0.0414425	0.859237	1.0108
Inflammatory bowel disease	IL16	Weighted median	16	0.934862	-0.0673568	0.00576359	-0.115174	-0.0195399	0.0243964	0.891211	0.98065
Inflammatory bowel disease	IL16	Inverse variance weighted	16	0.948899	-0.0524534	0.0302394	-0.0998975	-0.00500923	0.0242062	0.90493	0.995003
Inflammatory bowel disease	IL16	Simple mode	16	0.971741	-0.0286663	0.544659	-0.119311	0.0619783	0.0462472	0.887532	1.06394
Inflammatory bowel disease	IL16	Weighted mode	16	0.934896	-0.0673205	0.0115196	-0.113184	-0.0214572	0.0233996	0.892987	0.978771
Inflammatory bowel disease	IL18BP	MR Egger	11	1.19506	0.178195	0.129386	-0.0310236	0.387413	0.106744	0.969453	1.47316
Inflammatory bowel disease	IL18BP	Weighted median	11	1.00142	0.00142017	0.976183	-0.0918155	0.0946559	0.0475692	0.912273	1.09928
Inflammatory bowel disease	IL18BP	Inverse variance weighted	11	1.03573	0.0351089	0.443966	-0.054783	0.125001	0.0458633	0.946691	1.13315
Inflammatory bowel disease	IL18BP	Simple mode	11	1.00069	0.00068963	0.993341	-0.157283	0.158662	0.0805984	0.854462	1.17194
Inflammatory bowel disease	IL18BP	Weighted mode	11	1.00069	0.00068963	0.992566	-0.140813	0.142192	0.0721953	0.868652	1.1528
Inflammatory bowel disease	IL18R1	MR Egger	13	1.12981	0.122049	0.00295494	0.0590597	0.185039	0.0321375	1.06084	1.20327
Inflammatory bowel disease	IL18R1	Weighted median	13	1.12267	0.115709	3.65e-08	0.0745283	0.156889	0.0210105	1.07738	1.16987
Inflammatory bowel disease	IL18R1	Inverse variance weighted	13	1.09887	0.0942859	9.11e-06	0.0526381	0.135934	0.0212488	1.05405	1.14561
Inflammatory bowel disease	IL18R1	Simple mode	13	0.970407	-0.0300401	0.711975	-0.185771	0.125691	0.0794545	0.830464	1.13393
Inflammatory bowel disease	IL18R1	Weighted mode	13	1.13222	0.124184	0.000135853	0.079944	0.168423	0.0225713	1.08323	1.18344
Inflammatory bowel disease	IL19	MR Egger	12	0.970334	-0.0301146	0.406364	-0.0982086	0.0379795	0.0347419	0.90646	1.03871
Inflammatory bowel disease	IL19	Weighted median	12	0.984015	-0.0161145	0.398539	-0.0535263	0.0212974	0.0190877	0.947881	1.02153
Inflammatory bowel disease	IL19	Inverse variance weighted	12	0.98993	-0.0101206	0.6631	-0.0556549	0.0354137	0.0232318	0.945865	1.03605
Inflammatory bowel disease	IL19	Simple mode	12	0.946348	-0.0551445	0.257267	-0.145601	0.0353121	0.0461513	0.864503	1.03594
Inflammatory bowel disease	IL19	Weighted mode	12	0.984718	-0.0153996	0.481163	-0.0567961	0.0259969	0.0211207	0.944787	1.02634
Inflammatory bowel disease	IL1A	MR Egger	16	0.958472	-0.0424151	0.625193	-0.208853	0.124022	0.084917	0.811515	1.13204
Inflammatory bowel disease	IL1A	Weighted median	16	0.98737	-0.0127105	0.754349	-0.0923265	0.0669055	0.0406204	0.911807	1.06919
Inflammatory bowel disease	IL1A	Inverse variance weighted	16	0.969369	-0.03111	0.329128	-0.0935933	0.0313732	0.0318792	0.910653	1.03187
Inflammatory bowel disease	IL1A	Simple mode	16	1.0626	0.0607183	0.470471	-0.100009	0.221446	0.0820039	0.904829	1.24788
Inflammatory bowel disease	IL1A	Weighted mode	16	1.04253	0.0416507	0.61708	-0.118238	0.20154	0.0815761	0.888484	1.22328
Inflammatory bowel disease	IL1B	MR Egger	9	0.860702	-0.150006	0.323589	-0.426912	0.126899	0.141278	0.652521	1.1353
Inflammatory bowel disease	IL1B	Weighted median	9	0.990465	-0.00958114	0.85726	-0.113988	0.0948258	0.0532689	0.892269	1.09947
Inflammatory bowel disease	IL1B	Inverse variance weighted	9	0.93813	-0.063867	0.165089	-0.154043	0.0263095	0.0460084	0.857235	1.02666
Inflammatory bowel disease	IL1B	Simple mode	9	0.84018	-0.174139	0.137965	-0.381247	0.0329678	0.105667	0.683009	1.03352
Inflammatory bowel disease	IL1B	Weighted mode	9	1.05027	0.0490434	0.555096	-0.107038	0.205125	0.0796333	0.898492	1.22768
Inflammatory bowel disease	IL1R1	MR Egger	16	0.917221	-0.0864063	0.279456	-0.236929	0.0641159	0.0767971	0.789048	1.06622
Inflammatory bowel disease	IL1R1	Weighted median	16	0.959979	-0.0408442	0.327956	-0.12268	0.0409913	0.0417528	0.884547	1.04184
Inflammatory bowel disease	IL1R1	Inverse variance weighted	16	0.974114	-0.0262274	0.482718	-0.0994613	0.0470066	0.0373643	0.905325	1.04813
Inflammatory bowel disease	IL1R1	Simple mode	16	1.11455	0.108449	0.311475	-0.0944805	0.311378	0.103535	0.909845	1.3653
Inflammatory bowel disease	IL1R1	Weighted mode	16	1.10856	0.103063	0.302957	-0.0863014	0.292427	0.0966144	0.917318	1.33967
Inflammatory bowel disease	IL1R2	MR Egger	13	1.16112	0.149389	0.0574373	0.0113613	0.287416	0.0704221	1.01143	1.33298
Inflammatory bowel disease	IL1R2	Weighted median	13	1.11583	0.109596	0.000338525	0.0496588	0.169534	0.0305803	1.05091	1.18475
Inflammatory bowel disease	IL1R2	Inverse variance weighted	13	1.0577	0.0561014	0.110263	-0.00664834	0.118851	0.0320152	0.993374	1.1262
Inflammatory bowel disease	IL1R2	Simple mode	13	1.07985	0.0768262	0.197079	-0.0334302	0.187083	0.0562533	0.967122	1.20573
Inflammatory bowel disease	IL1R2	Weighted mode	13	1.13723	0.128591	0.000806131	0.0718324	0.18535	0.0289587	1.07448	1.20364
Inflammatory bowel disease	IL1RAP	MR Egger	14	0.99563	-0.0043798	0.837605	-0.0453639	0.0366043	0.0209102	0.95565	1.03728
Inflammatory bowel disease	IL1RAP	Weighted median	14	0.98978	-0.0102727	0.492128	-0.0395836	0.0190382	0.0149545	0.96119	1.01922
Inflammatory bowel disease	IL1RAP	Inverse variance weighted	14	0.984637	-0.0154819	0.316033	-0.0457465	0.0147827	0.0154411	0.955284	1.01489
Inflammatory bowel disease	IL1RAP	Simple mode	14	0.951192	-0.0500394	0.254673	-0.132338	0.0322595	0.0419892	0.876045	1.03279
Inflammatory bowel disease	IL1RAP	Weighted mode	14	0.987505	-0.0125736	0.425605	-0.042535	0.0173878	0.0152864	0.958357	1.01754
Inflammatory bowel disease	IL1RAPL2	MR Egger	12	0.94618	-0.0553224	0.470046	-0.199736	0.089091	0.0736803	0.818947	1.09318
Inflammatory bowel disease	IL1RAPL2	Weighted median	12	0.994653	-0.00536152	0.897271	-0.0867543	0.0760312	0.0415269	0.916902	1.079
Inflammatory bowel disease	IL1RAPL2	Inverse variance weighted	12	0.979235	-0.020984	0.519895	-0.0848972	0.0429292	0.0326088	0.918607	1.04386
Inflammatory bowel disease	IL1RAPL2	Simple mode	12	1.0061	0.00607761	0.912634	-0.100027	0.112182	0.0541349	0.904813	1.11872
Inflammatory bowel disease	IL1RAPL2	Weighted mode	12	1.00283	0.00283061	0.960574	-0.106878	0.112539	0.0559737	0.898635	1.11912
Inflammatory bowel disease	IL1RL1	MR Egger	15	1.12346	0.116417	0.000116552	0.0743379	0.158496	0.021469	1.07717	1.17175
Inflammatory bowel disease	IL1RL1	Weighted median	15	1.09432	0.0901339	1.08e-09	0.0611612	0.119107	0.014782	1.06307	1.12649
Inflammatory bowel disease	IL1RL1	Inverse variance weighted	15	1.072	0.0695221	9.38e-05	0.0346367	0.104408	0.0177987	1.03524	1.11005
Inflammatory bowel disease	IL1RL1	Simple mode	15	1.01039	0.0103348	0.873568	-0.114651	0.135321	0.0637683	0.891677	1.1449
Inflammatory bowel disease	IL1RL1	Weighted mode	15	1.10094	0.0961616	1.39e-05	0.0671824	0.125141	0.0147853	1.06949	1.13331
Inflammatory bowel disease	IL1RL2	MR Egger	9	0.836558	-0.17846	0.162065	-0.402272	0.0453526	0.11419	0.668799	1.0464
Inflammatory bowel disease	IL1RL2	Weighted median	9	0.97968	-0.0205293	0.700613	-0.12518	0.0841212	0.0533931	0.882338	1.08776
Inflammatory bowel disease	IL1RL2	Inverse variance weighted	9	0.992609	-0.00741798	0.864853	-0.0928424	0.0780064	0.0435839	0.911337	1.08113
Inflammatory bowel disease	IL1RL2	Simple mode	9	0.959832	-0.0409974	0.64925	-0.211092	0.129097	0.0867827	0.8097	1.1378
Inflammatory bowel disease	IL1RL2	Weighted mode	9	0.96319	-0.0375045	0.67516	-0.206547	0.131538	0.0862459	0.813388	1.14058
Inflammatory bowel disease	IL1RN	MR Egger	11	0.985541	-0.0145645	0.895129	-0.225099	0.19597	0.107416	0.798437	1.21649
Inflammatory bowel disease	IL1RN	Weighted median	11	0.958156	-0.0427442	0.318913	-0.126801	0.0413124	0.042886	0.880909	1.04218
Inflammatory bowel disease	IL1RN	Inverse variance weighted	11	0.971336	-0.0290829	0.441797	-0.103193	0.0450269	0.0378111	0.901953	1.04606
Inflammatory bowel disease	IL1RN	Simple mode	11	0.941074	-0.0607331	0.340767	-0.179737	0.0582712	0.0607165	0.83549	1.06
Inflammatory bowel disease	IL1RN	Weighted mode	11	0.952387	-0.048784	0.369578	-0.15055	0.0529823	0.0519216	0.860234	1.05441
Inflammatory bowel disease	IL20	MR Egger	5	1.04958	0.0483884	0.722611	-0.194826	0.291603	0.124089	0.822978	1.33857
Inflammatory bowel disease	IL20	Weighted median	5	1.01615	0.0160237	0.780572	-0.0967166	0.128764	0.0575206	0.907813	1.13742
Inflammatory bowel disease	IL20	Inverse variance weighted	5	0.985409	-0.0146984	0.753762	-0.106539	0.0771422	0.0468575	0.89894	1.0802
Inflammatory bowel disease	IL20	Simple mode	5	1.03469	0.034099	0.696041	-0.125017	0.193215	0.0811814	0.882482	1.21314
Inflammatory bowel disease	IL20	Weighted mode	5	1.03538	0.0347646	0.6999	-0.129698	0.199227	0.0839094	0.878361	1.22046
Inflammatory bowel disease	IL21	MR Egger	4	1.50415	0.408227	0.175135	0.0204687	0.795986	0.197836	1.02068	2.21663
Inflammatory bowel disease	IL21	Weighted median	4	1.18198	0.167188	0.00729691	0.0450522	0.289325	0.0623144	1.04608	1.33553
Inflammatory bowel disease	IL21	Inverse variance weighted	4	1.20482	0.186329	0.0507905	-0.000644372	0.373302	0.0953945	0.999356	1.45252
Inflammatory bowel disease	IL21	Simple mode	4	1.05775	0.0561451	0.682907	-0.188119	0.300409	0.124624	0.828516	1.35041
Inflammatory bowel disease	IL21	Weighted mode	4	1.34659	0.297578	0.0137033	0.185754	0.409401	0.057053	1.20413	1.50592
Inflammatory bowel disease	IL22	MR Egger	13	0.940366	-0.0614857	0.47989	-0.226279	0.103308	0.0840783	0.797495	1.10883
Inflammatory bowel disease	IL22	Weighted median	13	1.02168	0.0214487	0.616231	-0.062429	0.105326	0.0427947	0.93948	1.11107
Inflammatory bowel disease	IL22	Inverse variance weighted	13	1.02869	0.0282905	0.359156	-0.0321794	0.0887604	0.030852	0.968333	1.09282
Inflammatory bowel disease	IL22	Simple mode	13	0.998048	-0.00195368	0.97734	-0.133988	0.13008	0.0673643	0.874601	1.13892
Inflammatory bowel disease	IL22	Weighted mode	13	1.01415	0.0140504	0.842758	-0.121803	0.149903	0.0693128	0.885323	1.16172
Inflammatory bowel disease	IL2	MR Egger	15	0.914363	-0.0895274	0.367596	-0.277509	0.0984541	0.0959089	0.757669	1.10346
Inflammatory bowel disease	IL2	Weighted median	15	0.98664	-0.0134501	0.733892	-0.0909966	0.0640965	0.0395646	0.913021	1.0662
Inflammatory bowel disease	IL2	Inverse variance weighted	15	0.968307	-0.0322059	0.278035	-0.0903979	0.0259862	0.0296898	0.913568	1.02633
Inflammatory bowel disease	IL2	Simple mode	15	1.01139	0.0113255	0.888206	-0.143735	0.166386	0.0791127	0.866117	1.18103
Inflammatory bowel disease	IL2	Weighted mode	15	1.00846	0.00842672	0.913533	-0.140958	0.157811	0.0762167	0.868526	1.17095
Inflammatory bowel disease	IL24	MR Egger	15	0.982725	-0.0174258	0.869607	-0.221417	0.186566	0.104077	0.801382	1.2051
Inflammatory bowel disease	IL24	Weighted median	15	0.967848	-0.0326802	0.460112	-0.119395	0.054035	0.0442425	0.887457	1.05552
Inflammatory bowel disease	IL24	Inverse variance weighted	15	0.921508	-0.0817434	0.0429043	-0.160877	-0.00260981	0.0403743	0.851397	0.997394
Inflammatory bowel disease	IL24	Simple mode	15	1.01658	0.0164438	0.850675	-0.15162	0.184508	0.0857469	0.859315	1.20263
Inflammatory bowel disease	IL24	Weighted mode	15	1.01027	0.0102166	0.895617	-0.139663	0.160096	0.0764692	0.869651	1.17362
Inflammatory bowel disease	IL25	MR Egger	15	1.03475	0.0341552	0.18447	-0.0136092	0.0819195	0.0243695	0.986483	1.08537
Inflammatory bowel disease	IL25	Weighted median	15	1.03095	0.0304777	0.0914487	-0.00491519	0.0658705	0.0180576	0.995097	1.06809
Inflammatory bowel disease	IL25	Inverse variance weighted	15	1.0062	0.00617647	0.695911	-0.024797	0.03715	0.0158028	0.975508	1.03785
Inflammatory bowel disease	IL25	Simple mode	15	0.906706	-0.0979372	0.162075	-0.227988	0.0321133	0.0663523	0.796134	1.03263
Inflammatory bowel disease	IL25	Weighted mode	15	1.0314	0.0309173	0.105306	-0.00407755	0.0659121	0.0178545	0.995931	1.06813
Inflammatory bowel disease	IL27	MR Egger	17	1.06186	0.0600181	0.660295	-0.202344	0.322381	0.133858	0.816814	1.38041
Inflammatory bowel disease	IL27	Weighted median	17	1.0444	0.0434417	0.248835	-0.0303936	0.117277	0.037671	0.970064	1.12443
Inflammatory bowel disease	IL27	Inverse variance weighted	17	1.03743	0.0367429	0.259385	-0.024692	0.0981779	0.0313444	0.97561	1.10316
Inflammatory bowel disease	IL27	Simple mode	17	1.03849	0.0377711	0.548367	-0.0829597	0.158502	0.0615974	0.920388	1.17175
Inflammatory bowel disease	IL27	Weighted mode	17	1.03436	0.0337813	0.554582	-0.075916	0.143479	0.055968	0.926894	1.15428
Inflammatory bowel disease	IL27RA	MR Egger	10	1.0447	0.0437343	0.109335	-0.003853	0.0913215	0.0242792	0.996154	1.09562
Inflammatory bowel disease	IL27RA	Weighted median	10	1.04171	0.0408673	0.0329291	0.00331366	0.0784209	0.01916	1.00332	1.08158
Inflammatory bowel disease	IL27RA	Inverse variance weighted	10	1.03766	0.0369641	0.0242578	0.00480744	0.0691208	0.0164065	1.00482	1.07157
Inflammatory bowel disease	IL27RA	Simple mode	10	1.04132	0.0404864	0.423051	-0.0540643	0.135037	0.0482402	0.947371	1.14458
Inflammatory bowel disease	IL27RA	Weighted mode	10	1.04219	0.0413249	0.0582934	0.00396651	0.0786834	0.0190604	1.00397	1.08186
Inflammatory bowel disease	IL2RA	MR Egger	7	1.06299	0.0610838	0.840244	-0.502812	0.624979	0.287702	0.604828	1.86821
Inflammatory bowel disease	IL2RA	Weighted median	7	0.969056	-0.0314326	0.57219	-0.140506	0.0776409	0.0556497	0.868918	1.08073
Inflammatory bowel disease	IL2RA	Inverse variance weighted	7	0.998099	-0.00190254	0.968002	-0.0948613	0.0910563	0.047428	0.909499	1.09533
Inflammatory bowel disease	IL2RA	Simple mode	7	0.929342	-0.0732788	0.500655	-0.273757	0.1272	0.102285	0.760517	1.13564
Inflammatory bowel disease	IL2RA	Weighted mode	7	0.923667	-0.0794038	0.445654	-0.270118	0.11131	0.097303	0.76329	1.11774
Inflammatory bowel disease	IL2RB	MR Egger	12	0.956279	-0.0447059	0.76786	-0.333585	0.244173	0.147387	0.716351	1.27656
Inflammatory bowel disease	IL2RB	Weighted median	12	1.05743	0.0558389	0.226952	-0.034742	0.14642	0.0462148	0.965855	1.15768
Inflammatory bowel disease	IL2RB	Inverse variance weighted	12	1.04302	0.0421187	0.155025	-0.0110649	0.0953023	0.0271345	0.988996	1.09999
Inflammatory bowel disease	IL2RB	Simple mode	12	1.08398	0.0806416	0.273447	-0.0564715	0.217755	0.0699557	0.945093	1.24328
Inflammatory bowel disease	IL2RB	Weighted mode	12	1.06277	0.0608748	0.404283	-0.0766901	0.19844	0.0701862	0.926177	1.2195
Inflammatory bowel disease	IL31	MR Egger	11	0.979211	-0.0210081	0.71602	-0.130678	0.0886619	0.0559541	0.8775	1.09271
Inflammatory bowel disease	IL31	Weighted median	11	0.991121	-0.00891877	0.7309	-0.0597455	0.041908	0.025932	0.942004	1.0428
Inflammatory bowel disease	IL31	Inverse variance weighted	11	0.986561	-0.0135306	0.544363	-0.0572764	0.0302152	0.0223193	0.944333	1.03068
Inflammatory bowel disease	IL31	Simple mode	11	0.961189	-0.0395847	0.487351	-0.147175	0.0680059	0.0548931	0.863143	1.07037
Inflammatory bowel disease	IL31	Weighted mode	11	0.988076	-0.0119957	0.669191	-0.065413	0.0414216	0.0272537	0.936681	1.04229
Inflammatory bowel disease	IL32	MR Egger	12	0.939485	-0.0624237	0.412605	-0.205536	0.0806885	0.0730164	0.814211	1.08403
Inflammatory bowel disease	IL32	Weighted median	12	0.940293	-0.0615636	0.175457	-0.150623	0.0274958	0.0454385	0.860172	1.02788
Inflammatory bowel disease	IL32	Inverse variance weighted	12	0.951919	-0.0492754	0.163701	-0.118621	0.0200701	0.0353804	0.888144	1.02027
Inflammatory bowel disease	IL32	Simple mode	12	0.93273	-0.0696394	0.435438	-0.238272	0.0989935	0.0860372	0.787988	1.10406
Inflammatory bowel disease	IL32	Weighted mode	12	0.928673	-0.0739982	0.428684	-0.2505	0.102504	0.090052	0.778411	1.10794
Inflammatory bowel disease	IL34	MR Egger	13	1.11463	0.10852	0.130377	-0.0215947	0.238635	0.0663851	0.978637	1.26951
Inflammatory bowel disease	IL34	Weighted median	13	0.980672	-0.0195177	0.651305	-0.104161	0.065126	0.0431855	0.90108	1.06729
Inflammatory bowel disease	IL34	Inverse variance weighted	13	1.00787	0.00784179	0.825555	-0.0618928	0.0775764	0.0355789	0.939984	1.08066
Inflammatory bowel disease	IL34	Simple mode	13	0.968365	-0.0321467	0.669504	-0.176157	0.111864	0.0734747	0.838486	1.11836
Inflammatory bowel disease	IL34	Weighted mode	13	0.953449	-0.047669	0.580577	-0.212191	0.116853	0.0839398	0.80881	1.12395
Inflammatory bowel disease	IL3	MR Egger	9	1.09099	0.0870835	0.530602	-0.171683	0.34585	0.132024	0.842246	1.41319
Inflammatory bowel disease	IL3	Weighted median	9	1.02082	0.0206065	0.685897	-0.0792595	0.120472	0.050952	0.9238	1.12803
Inflammatory bowel disease	IL3	Inverse variance weighted	9	1.02162	0.0213893	0.646342	-0.069976	0.112755	0.0466149	0.932416	1.11936
Inflammatory bowel disease	IL3	Simple mode	9	0.967878	-0.0326493	0.725876	-0.208848	0.143549	0.0898972	0.811519	1.15436
Inflammatory bowel disease	IL3	Weighted mode	9	1.12635	0.118979	0.211752	-0.0528391	0.290797	0.0876624	0.948533	1.33749
Inflammatory bowel disease	IL36 alpha	MR Egger	10	1.07605	0.0733001	0.448824	-0.107113	0.253713	0.0920475	0.898424	1.2888
Inflammatory bowel disease	IL36 alpha	Weighted median	10	0.992077	-0.00795432	0.815791	-0.0748771	0.0589685	0.0341443	0.927858	1.06074
Inflammatory bowel disease	IL36 alpha	Inverse variance weighted	10	1.004	0.00399005	0.824261	-0.0299317	0.0379118	0.017307	0.970512	1.03864
Inflammatory bowel disease	IL36 alpha	Simple mode	10	1.00965	0.00959915	0.872618	-0.104452	0.12365	0.0581893	0.900818	1.13162
Inflammatory bowel disease	IL36 alpha	Weighted mode	10	0.995017	-0.00499496	0.887651	-0.0723585	0.0623686	0.0343692	0.930197	1.06435
Inflammatory bowel disease	IL36 beta	MR Egger	14	1.02608	0.0257505	0.679729	-0.0935473	0.145048	0.0608663	0.910695	1.1561
Inflammatory bowel disease	IL36 beta	Weighted median	14	1.01593	0.0158053	0.690445	-0.0619807	0.0935913	0.0396867	0.939901	1.09811
Inflammatory bowel disease	IL36 beta	Inverse variance weighted	14	1.00128	0.0012756	0.964711	-0.0552354	0.0577866	0.0288321	0.946262	1.05949
Inflammatory bowel disease	IL36 beta	Simple mode	14	1.02582	0.0254921	0.731799	-0.117183	0.168167	0.0727934	0.889422	1.18313
Inflammatory bowel disease	IL36 beta	Weighted mode	14	1.02466	0.024363	0.733538	-0.112922	0.161648	0.0700434	0.89322	1.17545
Inflammatory bowel disease	IL36 gamma	MR Egger	8	0.872342	-0.136574	0.304114	-0.374811	0.101662	0.121549	0.68742	1.10701
Inflammatory bowel disease	IL36 gamma	Weighted median	8	0.988054	-0.0120184	0.815652	-0.113056	0.0890196	0.05155	0.8931	1.0931
Inflammatory bowel disease	IL36 gamma	Inverse variance weighted	8	0.955873	-0.0451307	0.317745	-0.133666	0.043405	0.0451713	0.874882	1.04436
Inflammatory bowel disease	IL36 gamma	Simple mode	8	1.01354	0.0134447	0.847964	-0.119015	0.145904	0.0675812	0.887795	1.15708
Inflammatory bowel disease	IL36 gamma	Weighted mode	8	1.00378	0.00376983	0.955848	-0.125005	0.132545	0.0657015	0.882492	1.14173
Inflammatory bowel disease	IL37	MR Egger	12	1.06241	0.0605445	0.524255	-0.119295	0.240384	0.0917549	0.887546	1.27174
Inflammatory bowel disease	IL37	Weighted median	12	1.08075	0.0776521	0.0900874	-0.0121437	0.167448	0.0458141	0.98793	1.18228
Inflammatory bowel disease	IL37	Inverse variance weighted	12	1.10217	0.0972796	0.00701929	0.0265551	0.168004	0.0360839	1.02691	1.18294
Inflammatory bowel disease	IL37	Simple mode	12	0.978348	-0.0218901	0.827876	-0.214577	0.170796	0.0983094	0.806883	1.18625
Inflammatory bowel disease	IL37	Weighted mode	12	0.981164	-0.019016	0.858978	-0.223929	0.185897	0.104547	0.799372	1.2043
Inflammatory bowel disease	IL3RA	MR Egger	11	1.04187	0.0410196	0.560822	-0.0921125	0.174152	0.0679246	0.912003	1.19024
Inflammatory bowel disease	IL3RA	Weighted median	11	1.00983	0.0097804	0.810888	-0.0703328	0.0898936	0.0408741	0.932084	1.09406
Inflammatory bowel disease	IL3RA	Inverse variance weighted	11	0.991583	-0.00845238	0.778762	-0.0674227	0.0505179	0.0300869	0.9348	1.05182
Inflammatory bowel disease	IL3RA	Simple mode	11	0.93388	-0.0684076	0.342741	-0.203025	0.0662102	0.0686825	0.816258	1.06845
Inflammatory bowel disease	IL3RA	Weighted mode	11	1.04871	0.0475576	0.413646	-0.0617244	0.15684	0.0557561	0.940142	1.16981
Inflammatory bowel disease	IL4	MR Egger	15	0.993665	-0.00635514	0.941822	-0.173767	0.161057	0.0854142	0.840493	1.17475
Inflammatory bowel disease	IL4	Weighted median	15	1.00147	0.00147041	0.970253	-0.0758126	0.0787534	0.0394301	0.92699	1.08194
Inflammatory bowel disease	IL4	Inverse variance weighted	15	0.990407	-0.00963941	0.782532	-0.0780881	0.0588092	0.0349228	0.924883	1.06057
Inflammatory bowel disease	IL4	Simple mode	15	0.998252	-0.00174928	0.979704	-0.134138	0.130639	0.0675451	0.87447	1.13956
Inflammatory bowel disease	IL4	Weighted mode	15	1.00325	0.00324022	0.956879	-0.112132	0.118613	0.0588635	0.893926	1.12593
Inflammatory bowel disease	IL4RA	MR Egger	11	0.928933	-0.0737187	0.612243	-0.348914	0.201477	0.140406	0.705453	1.22321
Inflammatory bowel disease	IL4RA	Weighted median	11	0.976122	-0.0241677	0.625907	-0.121335	0.0729997	0.0495752	0.885737	1.07573
Inflammatory bowel disease	IL4RA	Inverse variance weighted	11	0.975508	-0.0247974	0.546214	-0.10534	0.0557451	0.0410931	0.900019	1.05733
Inflammatory bowel disease	IL4RA	Simple mode	11	0.902133	-0.102993	0.279954	-0.279717	0.0737308	0.0901653	0.755998	1.07652
Inflammatory bowel disease	IL4RA	Weighted mode	11	0.920327	-0.0830266	0.352599	-0.249947	0.0838941	0.0851636	0.778842	1.08751
Inflammatory bowel disease	IL5	MR Egger	9	1.12552	0.118244	0.551365	-0.25216	0.488647	0.188981	0.777121	1.63011
Inflammatory bowel disease	IL5	Weighted median	9	1.02831	0.0279146	0.572196	-0.0689527	0.124782	0.0494221	0.933371	1.1329
Inflammatory bowel disease	IL5	Inverse variance weighted	9	1.02797	0.0275883	0.518231	-0.0561064	0.111283	0.0427014	0.945439	1.11771
Inflammatory bowel disease	IL5	Simple mode	9	1.02244	0.0221967	0.789052	-0.135054	0.179448	0.08023	0.873669	1.19656
Inflammatory bowel disease	IL5	Weighted mode	9	1.02244	0.0221967	0.78053	-0.128767	0.17316	0.0770222	0.879179	1.18906
Inflammatory bowel disease	IL5RA	MR Egger	10	1.06569	0.0636212	0.577773	-0.151313	0.278555	0.10966	0.859579	1.32122
Inflammatory bowel disease	IL5RA	Weighted median	10	1.04183	0.040977	0.371176	-0.0488333	0.130787	0.0458216	0.95234	1.13973
Inflammatory bowel disease	IL5RA	Inverse variance weighted	10	1.01495	0.0148432	0.721944	-0.0669093	0.0965957	0.0417105	0.93528	1.10142
Inflammatory bowel disease	IL5RA	Simple mode	10	1.07896	0.0759995	0.332866	-0.0695625	0.221562	0.0742663	0.932802	1.24802
Inflammatory bowel disease	IL5RA	Weighted mode	10	1.05154	0.0502564	0.402738	-0.0619242	0.162437	0.057235	0.939954	1.17637
Inflammatory bowel disease	IL6	MR Egger	12	1.06744	0.0652672	0.496964	-0.116212	0.246746	0.0925913	0.890287	1.27985
Inflammatory bowel disease	IL6	Weighted median	12	1.02624	0.0259049	0.598007	-0.0703906	0.1222	0.0491304	0.93203	1.12998
Inflammatory bowel disease	IL6	Inverse variance weighted	12	1.0062	0.00618158	0.882082	-0.0755002	0.0878634	0.0416744	0.92728	1.09184
Inflammatory bowel disease	IL6	Simple mode	12	1.11878	0.112242	0.232619	-0.061908	0.286392	0.0888519	0.939969	1.33161
Inflammatory bowel disease	IL6	Weighted mode	12	1.0993	0.094678	0.313346	-0.08095	0.270306	0.0896061	0.92224	1.31037
Inflammatory bowel disease	IL6RA	MR Egger	9	1.10415	0.0990779	0.0551494	0.0145746	0.183581	0.0431139	1.01468	1.20151
Inflammatory bowel disease	IL6RA	Weighted median	9	0.987846	-0.0122281	0.411514	-0.0414125	0.0169562	0.01489	0.959433	1.0171
Inflammatory bowel disease	IL6RA	Inverse variance weighted	9	0.973809	-0.0265397	0.492827	-0.102387	0.049308	0.0386978	0.90268	1.05054
Inflammatory bowel disease	IL6RA	Simple mode	9	0.99923	-0.000770705	0.987509	-0.094298	0.0927566	0.047718	0.910011	1.09719
Inflammatory bowel disease	IL6RA	Weighted mode	9	0.989312	-0.0107452	0.480863	-0.0392332	0.0177427	0.0145347	0.961526	1.0179
Inflammatory bowel disease	IL6RB	MR Egger	10	0.90436	-0.100528	0.196957	-0.240528	0.0394721	0.0714285	0.786213	1.04026
Inflammatory bowel disease	IL6RB	Weighted median	10	0.979806	-0.0204009	0.582089	-0.0930578	0.052256	0.0370699	0.911141	1.05365
Inflammatory bowel disease	IL6RB	Inverse variance weighted	10	0.997626	-0.00237651	0.93835	-0.0626003	0.0578472	0.0307264	0.939319	1.05955
Inflammatory bowel disease	IL6RB	Simple mode	10	0.991833	-0.00820009	0.88823	-0.119366	0.102966	0.0567173	0.887483	1.10845
Inflammatory bowel disease	IL6RB	Weighted mode	10	0.980861	-0.0193246	0.656432	-0.101665	0.0630162	0.0420106	0.903332	1.06504
Inflammatory bowel disease	IL7	MR Egger	14	0.956531	-0.0444417	0.560765	-0.190031	0.101148	0.0742805	0.826933	1.10644
Inflammatory bowel disease	IL7	Weighted median	14	1.04857	0.0474249	0.242337	-0.0320787	0.126928	0.0405631	0.96843	1.13534
Inflammatory bowel disease	IL7	Inverse variance weighted	14	1.05426	0.0528358	0.0728456	-0.00489548	0.110567	0.0294548	0.995116	1.11691
Inflammatory bowel disease	IL7	Simple mode	14	1.12227	0.115352	0.150854	-0.032763	0.263468	0.075569	0.967768	1.30144
Inflammatory bowel disease	IL7	Weighted mode	14	1.11393	0.107895	0.145278	-0.0285922	0.244383	0.0696366	0.971813	1.27683
Inflammatory bowel disease	IL7RA	MR Egger	12	1.05833	0.056695	0.563447	-0.129278	0.242668	0.0948843	0.878729	1.27465
Inflammatory bowel disease	IL7RA	Weighted median	12	1.0723	0.0698061	0.0522762	-0.000688666	0.140301	0.0359667	0.999312	1.15062
Inflammatory bowel disease	IL7RA	Inverse variance weighted	12	1.06499	0.0629682	0.0496933	8.32e-05	0.125853	0.0320842	1.00008	1.13412
Inflammatory bowel disease	IL7RA	Simple mode	12	0.959608	-0.0412303	0.602735	-0.192043	0.109582	0.0769452	0.825272	1.11581
Inflammatory bowel disease	IL7RA	Weighted mode	12	1.07585	0.0731073	0.10548	-0.0081316	0.154346	0.0414484	0.991901	1.16689
Inflammatory bowel disease	IL9	MR Egger	10	1.02409	0.0238085	0.784573	-0.141251	0.188868	0.084214	0.868271	1.20788
Inflammatory bowel disease	IL9	Weighted median	10	0.986225	-0.0138706	0.768515	-0.106241	0.0785001	0.0471279	0.899208	1.08166
Inflammatory bowel disease	IL9	Inverse variance weighted	10	1.01531	0.0151957	0.669412	-0.0545622	0.0849535	0.0355907	0.9469	1.08867
Inflammatory bowel disease	IL9	Simple mode	10	0.957409	-0.0435251	0.631982	-0.215622	0.128572	0.0878047	0.80604	1.1372
Inflammatory bowel disease	IL9	Weighted mode	10	0.958779	-0.0420944	0.621113	-0.203301	0.119112	0.0822481	0.816033	1.1265
Inflammatory bowel disease	IL8	MR Egger	15	1.0832	0.0799203	0.395533	-0.0983542	0.258195	0.0909564	0.906328	1.29459
Inflammatory bowel disease	IL8	Weighted median	15	1.04138	0.0405511	0.328347	-0.0407628	0.121865	0.0414867	0.960057	1.1296
Inflammatory bowel disease	IL8	Inverse variance weighted	15	1.02396	0.0236762	0.486298	-0.0429781	0.0903305	0.0340073	0.957932	1.09454
Inflammatory bowel disease	IL8	Simple mode	15	1.03708	0.0364089	0.64172	-0.113648	0.186465	0.0765594	0.892573	1.20498
Inflammatory bowel disease	IL8	Weighted mode	15	1.03708	0.0364089	0.640199	-0.11296	0.185778	0.0762087	0.893186	1.20415
Inflammatory bowel disease	ILF3	MR Egger	5	0.87784	-0.130291	0.516071	-0.478169	0.217588	0.177489	0.619917	1.24307
Inflammatory bowel disease	ILF3	Weighted median	5	0.951611	-0.0495985	0.431368	-0.173145	0.0739482	0.063034	0.841016	1.07675
Inflammatory bowel disease	ILF3	Inverse variance weighted	5	0.98128	-0.0188971	0.70036	-0.115142	0.0773479	0.0491046	0.891239	1.08042
Inflammatory bowel disease	ILF3	Simple mode	5	0.949973	-0.0513216	0.556989	-0.208493	0.10585	0.0801895	0.811807	1.11165
Inflammatory bowel disease	ILF3	Weighted mode	5	0.950684	-0.0505739	0.537377	-0.19769	0.0965422	0.0750592	0.820624	1.10136
Inflammatory bowel disease	TIRAP	MR Egger	13	0.963382	-0.0373058	0.367522	-0.115113	0.0405011	0.0396974	0.891266	1.04133
Inflammatory bowel disease	TIRAP	Weighted median	13	0.954746	-0.04631	0.0772714	-0.0976856	0.00506568	0.0262121	0.906934	1.00508
Inflammatory bowel disease	TIRAP	Inverse variance weighted	13	0.984481	-0.015641	0.523554	-0.0637011	0.032419	0.0245204	0.938285	1.03295
Inflammatory bowel disease	TIRAP	Simple mode	13	1.07787	0.0749854	0.280412	-0.0550366	0.205007	0.0663378	0.946451	1.22753
Inflammatory bowel disease	TIRAP	Weighted mode	13	0.954606	-0.0464564	0.0830928	-0.0946234	0.00171054	0.024575	0.909715	1.00171

## Sheet: if_uc
Odds Ratios and Confidence Intervals for Inflammatory Cytokines in Relation to Ulcerative Colitis
Autoimmune diseases	inflammatory_factors	inflammatory_factors	nsnp	OR	beta	Pval	lo_ci	up_ci	se	or_lci95	or_uci95
Ulcerative colitis	MCSF	MR Egger	8	0.977628	-0.0226261	0.825471	-0.215146	0.169893	0.0982242	0.806424	1.18518
Ulcerative colitis	MCSF	Weighted median	8	1.00165	0.00164404	0.979397	-0.123133	0.126421	0.0636618	0.884146	1.13476
Ulcerative colitis	MCSF	Inverse variance weighted	8	1.00983	0.00978054	0.842481	-0.0866858	0.106247	0.0492175	0.916965	1.1121
Ulcerative colitis	MCSF	Simple mode	8	1.03195	0.0314539	0.776337	-0.177321	0.240229	0.106518	0.837511	1.27154
Ulcerative colitis	MCSF	Weighted mode	8	1.02711	0.0267532	0.816867	-0.191317	0.244824	0.11126	0.825871	1.2774
Ulcerative colitis	GCSF	MR Egger	6	0.867499	-0.142141	0.574121	-0.597993	0.31371	0.232577	0.549914	1.36849
Ulcerative colitis	GCSF	Weighted median	6	1.0223	0.022055	0.812277	-0.159965	0.204075	0.0928674	0.852174	1.22639
Ulcerative colitis	GCSF	Inverse variance weighted	6	0.919544	-0.0838776	0.406637	-0.281991	0.114236	0.101078	0.75428	1.12102
Ulcerative colitis	GCSF	Simple mode	6	1.06623	0.0641332	0.705963	-0.250449	0.378715	0.160501	0.778451	1.46041
Ulcerative colitis	GCSF	Weighted mode	6	1.0823	0.0790925	0.530235	-0.150925	0.30911	0.117356	0.859912	1.36221
Ulcerative colitis	GCSFR	MR Egger	7	1.06043	0.0586735	0.811556	-0.398878	0.516225	0.233444	0.671073	1.67569
Ulcerative colitis	GCSFR	Weighted median	7	1.02897	0.0285624	0.700812	-0.117139	0.174264	0.0743376	0.889461	1.19037
Ulcerative colitis	GCSFR	Inverse variance weighted	7	1.03738	0.0367001	0.62991	-0.112582	0.185982	0.0761643	0.893524	1.2044
Ulcerative colitis	GCSFR	Simple mode	7	0.98587	-0.0142304	0.906538	-0.242003	0.213542	0.11621	0.785054	1.23806
Ulcerative colitis	GCSFR	Weighted mode	7	1.00166	0.00165444	0.989146	-0.227034	0.230342	0.116678	0.796894	1.25903
Ulcerative colitis	GM-CSF	MR Egger	8	1.0867	0.0831434	0.555572	-0.177997	0.344284	0.133235	0.836945	1.41098
Ulcerative colitis	GM-CSF	Weighted median	8	0.997477	-0.00252621	0.968617	-0.128377	0.123324	0.0642094	0.879522	1.13125
Ulcerative colitis	GM-CSF	Inverse variance weighted	8	0.967836	-0.0326929	0.499183	-0.127514	0.0621285	0.0483783	0.880281	1.0641
Ulcerative colitis	GM-CSF	Simple mode	8	1.0261	0.0257659	0.813452	-0.180325	0.231857	0.105148	0.834999	1.26094
Ulcerative colitis	GM-CSF	Weighted mode	8	1.03101	0.0305367	0.746113	-0.147151	0.208225	0.0906572	0.863163	1.23149
Ulcerative colitis	CSF2RA	MR Egger	11	1.31893	0.276819	0.0319431	0.062836	0.490803	0.109175	1.06485	1.63363
Ulcerative colitis	CSF2RA	Weighted median	11	1.00757	0.00753816	0.90649	-0.11824	0.133316	0.0641724	0.888483	1.14261
Ulcerative colitis	CSF2RA	Inverse variance weighted	11	0.977311	-0.0229506	0.68454	-0.133671	0.0877701	0.0564902	0.874878	1.09174
Ulcerative colitis	CSF2RA	Simple mode	11	1.08407	0.0807238	0.499037	-0.144844	0.306292	0.115086	0.865157	1.35838
Ulcerative colitis	CSF2RA	Weighted mode	11	1.06369	0.0617443	0.587104	-0.15395	0.277439	0.110048	0.857315	1.31975
Ulcerative colitis	CXCL10	MR Egger	6	1.06905	0.0667701	0.767362	-0.346552	0.480093	0.210879	0.707122	1.61622
Ulcerative colitis	CXCL10	Weighted median	6	0.945064	-0.0565028	0.462149	-0.207113	0.094107	0.0768417	0.812928	1.09868
Ulcerative colitis	CXCL10	Inverse variance weighted	6	1.01263	0.0125465	0.864048	-0.131074	0.156167	0.0732757	0.877153	1.16902
Ulcerative colitis	CXCL10	Simple mode	6	0.888422	-0.118309	0.453784	-0.40394	0.167322	0.14573	0.667684	1.18213
Ulcerative colitis	CXCL10	Weighted mode	6	0.884699	-0.122508	0.377056	-0.37031	0.125293	0.126429	0.69052	1.13348
Ulcerative colitis	CXCL11	MR Egger	11	0.837264	-0.177616	0.19828	-0.428273	0.0730411	0.127886	0.651634	1.07577
Ulcerative colitis	CXCL11	Weighted median	11	1.03879	0.0380539	0.468835	-0.0649114	0.141019	0.0525333	0.93715	1.15145
Ulcerative colitis	CXCL11	Inverse variance weighted	11	1.03416	0.0335908	0.315609	-0.10907	0.176251	0.0727859	0.896668	1.19274
Ulcerative colitis	CXCL11	Simple mode	11	0.98806	-0.0120114	0.881593	-0.166082	0.142059	0.0786075	0.846977	1.15264
Ulcerative colitis	CXCL11	Weighted mode	11	1.1225	0.115561	0.0855914	-0.00319564	0.234317	0.0605901	0.996809	1.26405
Ulcerative colitis	CXCL5	MR Egger	10	0.877882	-0.130243	0.529818	-0.518981	0.258494	0.198335	0.595127	1.29498
Ulcerative colitis	CXCL5	Weighted median	10	0.948762	-0.0525972	0.393752	-0.173478	0.0682831	0.0616736	0.840736	1.07067
Ulcerative colitis	CXCL5	Inverse variance weighted	10	0.985088	-0.0150241	0.711044	-0.0917265	0.0616784	0.0391339	0.912355	1.06362
Ulcerative colitis	CXCL5	Simple mode	10	0.932957	-0.0693957	0.45627	-0.244117	0.105326	0.0891436	0.783396	1.11107
Ulcerative colitis	CXCL5	Weighted mode	10	0.924176	-0.0788522	0.426917	-0.264603	0.106899	0.094771	0.76751	1.11282
Ulcerative colitis	CXCL13	MR Egger	14	0.762907	-0.27062	0.0675221	-0.534576	-0.00666339	0.134672	0.585918	0.993359
Ulcerative colitis	CXCL13	Weighted median	14	1.00442	0.00440861	0.937036	-0.104975	0.113792	0.0558078	0.900347	1.12052
Ulcerative colitis	CXCL13	Inverse variance weighted	14	0.98313	-0.0170136	0.697095	-0.100645	0.0666183	0.0426693	0.904254	1.06889
Ulcerative colitis	CXCL13	Simple mode	14	0.999539	-0.000461146	0.995865	-0.171541	0.170619	0.0872856	0.842366	1.18604
Ulcerative colitis	CXCL13	Weighted mode	14	0.999539	-0.000461146	0.995535	-0.158914	0.157991	0.080843	0.85307	1.17116
Ulcerative colitis	CXCL14	MR Egger	9	0.979621	-0.0205899	0.87504	-0.268007	0.226827	0.126233	0.764903	1.25461
Ulcerative colitis	CXCL14	Weighted median	9	0.978182	-0.0220591	0.717781	-0.141685	0.0975665	0.0610335	0.867895	1.10248
Ulcerative colitis	CXCL14	Inverse variance weighted	9	0.932126	-0.0702872	0.131541	-0.161639	0.0210644	0.046608	0.850748	1.02129
Ulcerative colitis	CXCL14	Simple mode	9	0.999668	-0.000332538	0.997116	-0.175121	0.174456	0.0891779	0.839355	1.1906
Ulcerative colitis	CXCL14	Weighted mode	9	1.00078	0.000783202	0.993184	-0.173405	0.174971	0.0888715	0.840797	1.19121
Ulcerative colitis	CXCL9	MR Egger	11	1.15074	0.140403	0.288711	-0.103678	0.384484	0.124531	0.901516	1.46886
Ulcerative colitis	CXCL9	Weighted median	11	1.09648	0.0921041	0.148123	-0.0327229	0.216931	0.0636873	0.967807	1.24226
Ulcerative colitis	CXCL9	Inverse variance weighted	11	1.0246	0.0242985	0.66175	-0.0845593	0.133156	0.0555397	0.918917	1.14243
Ulcerative colitis	CXCL9	Simple mode	11	1.15255	0.141978	0.212437	-0.0669472	0.350904	0.106595	0.935245	1.42035
Ulcerative colitis	CXCL9	Weighted mode	11	1.15049	0.14019	0.246304	-0.0829266	0.363306	0.113835	0.920419	1.43808
Ulcerative colitis	CXCL16	MR Egger	20	1.23386	0.210148	0.0780702	-0.0103016	0.430597	0.112474	0.989751	1.53817
Ulcerative colitis	CXCL16	Weighted median	20	1.06042	0.0586619	0.203032	-0.0316608	0.148985	0.046083	0.968835	1.16066
Ulcerative colitis	CXCL16	Inverse variance weighted	20	1.03443	0.0338509	0.490702	-0.0624178	0.13012	0.0491167	0.93949	1.13896
Ulcerative colitis	CXCL16	Simple mode	20	1.13492	0.126563	0.154591	-0.0407591	0.293885	0.0853683	0.96006	1.34163
Ulcerative colitis	CXCL16	Weighted mode	20	1.1256	0.118314	0.167079	-0.0430997	0.279728	0.0823541	0.957816	1.32277
Ulcerative colitis	CCL1	MR Egger	14	1.05319	0.0518203	0.539462	-0.108977	0.212618	0.0820395	0.896751	1.23691
Ulcerative colitis	CCL1	Weighted median	14	1.07919	0.0762068	0.129413	-0.0222919	0.174706	0.0502544	0.977955	1.1909
Ulcerative colitis	CCL1	Inverse variance weighted	14	1.05492	0.0534673	0.145047	-0.0184461	0.125381	0.0366905	0.981723	1.13358
Ulcerative colitis	CCL1	Simple mode	14	1.18201	0.167214	0.158437	-0.0518095	0.386238	0.111747	0.94951	1.47143
Ulcerative colitis	CCL1	Weighted mode	14	1.17434	0.160708	0.141061	-0.0402701	0.361686	0.10254	0.96053	1.43575
Ulcerative colitis	CCL13	MR Egger	15	0.869161	-0.140227	0.237916	-0.362388	0.081934	0.113347	0.696012	1.08538
Ulcerative colitis	CCL13	Weighted median	15	0.960627	-0.0401689	0.439021	-0.141909	0.0615708	0.051908	0.867701	1.06351
Ulcerative colitis	CCL13	Inverse variance weighted	15	0.987614	-0.0124636	0.765574	-0.0943921	0.069465	0.0418003	0.909926	1.07193
Ulcerative colitis	CCL13	Simple mode	15	0.955722	-0.0452881	0.646664	-0.234769	0.144193	0.0966739	0.790754	1.15511
Ulcerative colitis	CCL13	Weighted mode	15	0.957292	-0.0436468	0.639935	-0.222567	0.135273	0.0912859	0.800461	1.14485
Ulcerative colitis	CCL17	MR Egger	5	0.983155	-0.0169889	0.853	-0.18209	0.148112	0.0842351	0.833527	1.15964
Ulcerative colitis	CCL17	Weighted median	5	1.02416	0.0238679	0.571	-0.0586841	0.10642	0.0421184	0.943005	1.11229
Ulcerative colitis	CCL17	Inverse variance weighted	5	1.02643	0.0260899	0.479	-0.0462072	0.098387	0.0368863	0.954844	1.10339
Ulcerative colitis	CCL17	Simple mode	5	0.971573	-0.028839	0.663	-0.149262	0.0915839	0.0614402	0.861344	1.09591
Ulcerative colitis	CCL17	Weighted mode	5	1.02433	0.024043	0.661	-0.0755102	0.123596	0.0507925	0.92727	1.13156
Ulcerative colitis	CCL3	MR Egger	11	0.98277	-0.0173805	0.889702	-0.256173	0.221412	0.121833	0.774008	1.24784
Ulcerative colitis	CCL3	Weighted median	11	0.883946	-0.12336	0.0327162	-0.236579	-0.0101406	0.0577649	0.789323	0.989911
Ulcerative colitis	CCL3	Inverse variance weighted	11	0.890306	-0.11619	0.0059727	-0.199023	-0.0333563	0.0422619	0.819531	0.967194
Ulcerative colitis	CCL3	Simple mode	11	0.871774	-0.137225	0.186081	-0.326661	0.0522112	0.0966511	0.721328	1.0536
Ulcerative colitis	CCL3	Weighted mode	11	0.868275	-0.141246	0.187719	-0.337028	0.0545349	0.0998884	0.713889	1.05605
Ulcerative colitis	CCL20	MR Egger	8	1.05635	0.0548199	0.83519	-0.439689	0.549329	0.2523	0.644237	1.73209
Ulcerative colitis	CCL20	Weighted median	8	1.01857	0.0184008	0.785882	-0.114358	0.15116	0.0677343	0.891938	1.16318
Ulcerative colitis	CCL20	Inverse variance weighted	8	0.996401	-0.00360567	0.953318	-0.124328	0.117117	0.061593	0.88309	1.12425
Ulcerative colitis	CCL20	Simple mode	8	1.06262	0.0607329	0.620977	-0.169439	0.290905	0.117435	0.844138	1.33764
Ulcerative colitis	CCL20	Weighted mode	8	1.06262	0.0607329	0.591677	-0.151093	0.272559	0.108074	0.859768	1.31332
Ulcerative colitis	CCL22	MR Egger	12	1.01446	0.0143531	0.839248	-0.120764	0.14947	0.0689371	0.886243	1.16122
Ulcerative colitis	CCL22	Weighted median	12	1.05888	0.057216	0.216604	-0.0335435	0.147976	0.0463059	0.967013	1.15948
Ulcerative colitis	CCL22	Inverse variance weighted	12	1.06962	0.0673035	0.0479537	0.000605008	0.134002	0.0340298	1.00061	1.1434
Ulcerative colitis	CCL22	Simple mode	12	1.12877	0.121131	0.153972	-0.0339274	0.276188	0.0791112	0.966642	1.3181
Ulcerative colitis	CCL22	Weighted mode	12	1.07622	0.0734552	0.262502	-0.0484501	0.19536	0.0621966	0.952705	1.21575
Ulcerative colitis	CCL5	MR Egger	14	1.12368	0.11661	0.39	-0.139847	0.373066	0.130845	0.869491	1.45218
Ulcerative colitis	CCL5	Weighted median	14	0.983373	-0.0167666	0.753	-0.120999	0.0874661	0.0531799	0.886035	1.09141
Ulcerative colitis	CCL5	Inverse variance weighted	14	0.987208	-0.0128746	0.784	-0.104773	0.0790235	0.0468868	0.900529	1.08223
Ulcerative colitis	CCL5	Simple mode	14	0.971921	-0.0284811	0.752	-0.201164	0.144202	0.0881034	0.817778	1.15512
Ulcerative colitis	CCL5	Weighted mode	14	1.00171	0.00170762	0.983	-0.148186	0.151601	0.0764761	0.862271	1.1637
Ulcerative colitis	CCL7	MR Egger	17	1.00799	0.00795999	0.862669	-0.0806989	0.0966189	0.0452341	0.922471	1.10144
Ulcerative colitis	CCL7	Weighted median	17	1.01282	0.0127403	0.709918	-0.054392	0.0798725	0.0342511	0.947061	1.08315
Ulcerative colitis	CCL7	Inverse variance weighted	17	1.01413	0.0140296	0.575679	-0.0350997	0.0631588	0.025066	0.965509	1.0652
Ulcerative colitis	CCL7	Simple mode	17	0.933513	-0.0687999	0.323276	-0.201108	0.0635084	0.0675042	0.817824	1.06557
Ulcerative colitis	CCL7	Weighted mode	17	1.01591	0.0157882	0.66179	-0.0536424	0.0852187	0.0354237	0.947771	1.08896
Ulcerative colitis	CCL8	MR Egger	12	0.95438	-0.0466933	0.757101	-0.334581	0.241194	0.146881	0.715638	1.27277
Ulcerative colitis	CCL8	Weighted median	12	0.917571	-0.0860258	0.135552	-0.198993	0.0269414	0.0576363	0.819556	1.02731
Ulcerative colitis	CCL8	Inverse variance weighted	12	0.960849	-0.0399382	0.397525	-0.132461	0.0525846	0.0472055	0.875937	1.05399
Ulcerative colitis	CCL8	Simple mode	12	0.859362	-0.151565	0.249503	-0.3959	0.0927706	0.124661	0.673074	1.09721
Ulcerative colitis	CCL8	Weighted mode	12	0.870009	-0.139252	0.237627	-0.35779	0.0792874	0.111499	0.69922	1.08252
Ulcerative colitis	TGFA	MR Egger	6	1.13782	0.129118	0.530679	-0.240047	0.498284	0.18835	0.786591	1.64589
Ulcerative colitis	TGFA	Weighted median	6	1.04258	0.0416937	0.584253	-0.107652	0.19104	0.076197	0.89794	1.21051
Ulcerative colitis	TGFA	Inverse variance weighted	6	1.01933	0.0191471	0.765127	-0.106469	0.144763	0.0640899	0.899003	1.15577
Ulcerative colitis	TGFA	Simple mode	6	1.09261	0.0885733	0.498032	-0.149176	0.326323	0.121301	0.861417	1.38586
Ulcerative colitis	TGFA	Weighted mode	6	1.08846	0.0847627	0.478875	-0.132444	0.30197	0.11082	0.875952	1.35252
Ulcerative colitis	TGFB1	MR Egger	7	1.25852	0.229936	0.106875	0.000353383	0.459519	0.117134	1.00035	1.58331
Ulcerative colitis	TGFB1	Weighted median	7	0.940256	-0.0616033	0.427773	-0.213862	0.0906557	0.0776832	0.80746	1.09489
Ulcerative colitis	TGFB1	Inverse variance weighted	7	0.963942	-0.0367244	0.581123	-0.167183	0.093734	0.0665604	0.846045	1.09827
Ulcerative colitis	TGFB1	Simple mode	7	1.10236	0.0974573	0.491196	-0.16314	0.358055	0.132958	0.849472	1.43054
Ulcerative colitis	TGFB1	Weighted mode	7	0.937646	-0.0643833	0.624835	-0.309318	0.180551	0.124967	0.733947	1.19788
Ulcerative colitis	TGFB2	MR Egger	12	0.951785	-0.0494164	0.717749	-0.309874	0.211041	0.132886	0.733539	1.23496
Ulcerative colitis	TGFB2	Weighted median	12	0.982916	-0.0172315	0.739874	-0.118954	0.0844904	0.051899	0.887849	1.08816
Ulcerative colitis	TGFB2	Inverse variance weighted	12	0.980942	-0.0192423	0.636742	-0.0991027	0.0606182	0.0407451	0.90565	1.06249
Ulcerative colitis	TGFB2	Simple mode	12	1.00563	0.00561558	0.950402	-0.167346	0.178577	0.0882458	0.845907	1.19552
Ulcerative colitis	TGFB2	Weighted mode	12	1.05272	0.0513801	0.555938	-0.114426	0.217186	0.0845948	0.891878	1.24258
Ulcerative colitis	TGFB3	MR Egger	11	1.07408	0.071467	0.476927	-0.11728	0.260214	0.0962995	0.889336	1.29721
Ulcerative colitis	TGFB3	Weighted median	11	1.06941	0.0671024	0.203485	-0.0363199	0.170525	0.0527665	0.964332	1.18593
Ulcerative colitis	TGFB3	Inverse variance weighted	11	1.07996	0.0769253	0.0457233	0.00146075	0.15239	0.0385023	1.00146	1.16461
Ulcerative colitis	TGFB3	Simple mode	11	1.19096	0.174761	0.0922785	-0.00924153	0.358764	0.093879	0.990801	1.43156
Ulcerative colitis	TGFB3	Weighted mode	11	1.17649	0.162532	0.10442	-0.0158441	0.340909	0.0910084	0.984281	1.40623
Ulcerative colitis	IL10	MR Egger	7	1.21009	0.190691	0.170513	-0.0429174	0.4243	0.119188	0.957991	1.52852
Ulcerative colitis	IL10	Weighted median	7	1.03421	0.0336396	0.623716	-0.100757	0.168036	0.0685697	0.904153	1.18298
Ulcerative colitis	IL10	Inverse variance weighted	7	1.07329	0.0707263	0.175936	-0.0317019	0.173154	0.0522592	0.968795	1.18905
Ulcerative colitis	IL10	Simple mode	7	1.0327	0.032178	0.75612	-0.161802	0.226158	0.0989693	0.85061	1.25377
Ulcerative colitis	IL10	Weighted mode	7	1.03163	0.0311419	0.758873	-0.158824	0.221108	0.0969216	0.853146	1.24746
Ulcerative colitis	IL10RB	MR Egger	11	1.15761	0.14636	0.203335	-0.0627492	0.355469	0.106688	0.939179	1.42685
Ulcerative colitis	IL10RB	Weighted median	11	1.12768	0.120159	0.0373099	0.00706036	0.233257	0.0577032	1.00709	1.26271
Ulcerative colitis	IL10RB	Inverse variance weighted	11	1.09495	0.0907075	0.041571	0.0034626	0.177952	0.0445127	1.00347	1.19477
Ulcerative colitis	IL10RB	Simple mode	11	1.16842	0.155654	0.100767	-0.0131069	0.324414	0.0861024	0.986979	1.38322
Ulcerative colitis	IL10RB	Weighted mode	11	1.15828	0.146936	0.125608	-0.0253787	0.319251	0.0879159	0.974941	1.3761
Ulcerative colitis	IL11	MR Egger	12	0.892731	-0.11347	0.324388	-0.328042	0.101102	0.109476	0.720332	1.10639
Ulcerative colitis	IL11	Weighted median	12	0.964428	-0.0362198	0.514251	-0.145063	0.072623	0.055532	0.864968	1.07533
Ulcerative colitis	IL11	Inverse variance weighted	12	0.980188	-0.0200109	0.652284	-0.107055	0.0670334	0.0444104	0.898476	1.06933
Ulcerative colitis	IL11	Simple mode	12	0.967835	-0.0326935	0.74902	-0.228016	0.162629	0.0996544	0.796111	1.1766
Ulcerative colitis	IL11	Weighted mode	12	0.958404	-0.042486	0.693436	-0.248235	0.163263	0.104974	0.780176	1.17735
Ulcerative colitis	IL11RA	MR Egger	9	1.02391	0.0236269	0.763068	-0.124109	0.171363	0.0753754	0.883284	1.18692
Ulcerative colitis	IL11RA	Weighted median	9	1.05147	0.0501896	0.309192	-0.0465454	0.146925	0.0493546	0.954521	1.15827
Ulcerative colitis	IL11RA	Inverse variance weighted	9	1.09649	0.0921142	0.0149939	0.0178935	0.166335	0.0378677	1.01805	1.18097
Ulcerative colitis	IL11RA	Simple mode	9	1.23454	0.210697	0.0394759	0.0426499	0.378744	0.0857383	1.04357	1.46045
Ulcerative colitis	IL11RA	Weighted mode	9	1.05128	0.0500128	0.407808	-0.0621991	0.162225	0.057251	0.939696	1.17612
Ulcerative colitis	IL12	MR Egger	13	0.844266	-0.169287	0.321964	-0.48923	0.150656	0.163236	0.613098	1.1626
Ulcerative colitis	IL12	Weighted median	13	0.976687	-0.0235895	0.652169	-0.126164	0.0789846	0.0523337	0.881471	1.08219
Ulcerative colitis	IL12	Inverse variance weighted	13	0.964383	-0.0362664	0.365763	-0.114859	0.0423261	0.0400982	0.891492	1.04323
Ulcerative colitis	IL12	Simple mode	13	1.00005	4.83e-05	0.999549	-0.164251	0.164347	0.0838259	0.848529	1.17862
Ulcerative colitis	IL12	Weighted mode	13	0.992307	-0.00772244	0.925348	-0.165903	0.150458	0.0807045	0.847128	1.16237
Ulcerative colitis	IL23	MR Egger	14	1.39711	0.334408	0.102207	-0.0360188	0.704835	0.188993	0.964622	2.02351
Ulcerative colitis	IL23	Weighted median	14	0.96104	-0.0397393	0.325878	-0.11902	0.039541	0.0404491	0.88779	1.04033
Ulcerative colitis	IL23	Inverse variance weighted	14	0.954111	-0.0469754	0.130438	-0.102855	0.00890427	0.02851	0.902258	1.00894
Ulcerative colitis	IL23	Simple mode	14	0.939986	-0.0618901	0.324706	-0.180401	0.0566204	0.0604645	0.834936	1.05825
Ulcerative colitis	IL23	Weighted mode	14	0.929385	-0.0732318	0.23877	-0.189476	0.0430121	0.0593081	0.827393	1.04395
Ulcerative colitis	IL13	MR Egger	13	0.953964	-0.0471298	0.591987	-0.214475	0.120215	0.0853802	0.806965	1.12774
Ulcerative colitis	IL13	Weighted median	13	1.0015	0.00149745	0.976429	-0.0978392	0.100834	0.050682	0.906795	1.10609
Ulcerative colitis	IL13	Inverse variance weighted	13	1.02603	0.0256931	0.49269	-0.0477118	0.099098	0.0374515	0.953409	1.10417
Ulcerative colitis	IL13	Simple mode	13	0.97899	-0.0212336	0.799062	-0.181132	0.138664	0.0815806	0.834325	1.14874
Ulcerative colitis	IL13	Weighted mode	13	0.97899	-0.0212336	0.804914	-0.186045	0.143578	0.0840876	0.830236	1.1544
Ulcerative colitis	IL16	MR Egger	16	0.931943	-0.0704836	0.111085	-0.151711	0.0107437	0.0414425	0.859237	1.0108
Ulcerative colitis	IL16	Weighted median	16	0.934862	-0.0673568	0.00462684	-0.113975	-0.0207386	0.0237848	0.89228	0.979475
Ulcerative colitis	IL16	Inverse variance weighted	16	0.948899	-0.0524534	0.0302394	-0.0998975	-0.00500923	0.0242062	0.90493	0.995003
Ulcerative colitis	IL16	Simple mode	16	0.971741	-0.0286663	0.541877	-0.118679	0.061347	0.0459251	0.888092	1.06327
Ulcerative colitis	IL16	Weighted mode	16	0.934896	-0.0673205	0.0141202	-0.114848	-0.0197928	0.0242488	0.891501	0.980402
Ulcerative colitis	IL18BP	MR Egger	11	1.21627	0.19579	0.178503	-0.0671894	0.45877	0.134173	0.935018	1.58213
Ulcerative colitis	IL18BP	Weighted median	11	0.971936	-0.0284656	0.649752	-0.151328	0.0943968	0.0626849	0.859566	1.099
Ulcerative colitis	IL18BP	Inverse variance weighted	11	1.02259	0.0223418	0.695723	-0.0896239	0.134307	0.0571253	0.914275	1.14374
Ulcerative colitis	IL18BP	Simple mode	11	0.967334	-0.0332112	0.708883	-0.202645	0.136222	0.0864456	0.816568	1.14594
Ulcerative colitis	IL18BP	Weighted mode	11	0.967334	-0.0332112	0.719516	-0.209417	0.142994	0.0899007	0.811057	1.15372
Ulcerative colitis	IL18R1	MR Egger	13	1.06453	0.0625307	0.112865	-0.00860566	0.133667	0.0362941	0.991431	1.14301
Ulcerative colitis	IL18R1	Weighted median	13	1.07917	0.0761903	0.00410018	0.0241642	0.128216	0.0265439	1.02446	1.1368
Ulcerative colitis	IL18R1	Inverse variance weighted	13	1.0523	0.0509798	0.0259222	0.00611965	0.09584	0.0228878	1.00614	1.10058
Ulcerative colitis	IL18R1	Simple mode	13	0.958983	-0.0418815	0.584505	-0.187962	0.104199	0.074531	0.828646	1.10982
Ulcerative colitis	IL18R1	Weighted mode	13	1.07275	0.0702273	0.0222599	0.0177516	0.122703	0.0267733	1.01791	1.13055
Ulcerative colitis	IL19	MR Egger	12	0.981531	-0.0186419	0.652919	-0.0974702	0.0601864	0.0402185	0.907129	1.06203
Ulcerative colitis	IL19	Weighted median	12	0.989696	-0.0103572	0.687854	-0.0608842	0.0401697	0.0257791	0.940932	1.04099
Ulcerative colitis	IL19	Inverse variance weighted	12	0.997592	-0.00241115	0.927407	-0.0542819	0.0494596	0.0264647	0.947165	1.0507
Ulcerative colitis	IL19	Simple mode	12	1.00542	0.00540147	0.930822	-0.113795	0.124598	0.0608144	0.892441	1.13269
Ulcerative colitis	IL19	Weighted mode	12	0.991521	-0.00851513	0.760642	-0.0619537	0.0449234	0.0272646	0.939926	1.04595
Ulcerative colitis	IL1A	MR Egger	15	0.964486	-0.0361604	0.735263	-0.241311	0.16899	0.104669	0.785597	1.18411
Ulcerative colitis	IL1A	Weighted median	15	1.02262	0.0223726	0.656378	-0.076185	0.12093	0.0502845	0.926645	1.12855
Ulcerative colitis	IL1A	Inverse variance weighted	15	1.00455	0.00453767	0.902471	-0.0680411	0.0771164	0.03703	0.934222	1.08017
Ulcerative colitis	IL1A	Simple mode	15	1.10632	0.101041	0.320779	-0.0913554	0.293437	0.0981614	0.912693	1.34103
Ulcerative colitis	IL1A	Weighted mode	15	1.10441	0.0993101	0.336385	-0.0962158	0.294836	0.0997581	0.908268	1.34291
Ulcerative colitis	IL1B	MR Egger	9	0.865582	-0.144353	0.476595	-0.520613	0.231908	0.19197	0.594156	1.261
Ulcerative colitis	IL1B	Weighted median	9	0.93918	-0.0627484	0.384231	-0.204092	0.078595	0.072114	0.815387	1.08177
Ulcerative colitis	IL1B	Inverse variance weighted	9	0.92602	-0.076859	0.209749	-0.196965	0.0432469	0.0612785	0.82122	1.0442
Ulcerative colitis	IL1B	Simple mode	9	0.922705	-0.0804459	0.535505	-0.323996	0.163104	0.12426	0.723253	1.17716
Ulcerative colitis	IL1B	Weighted mode	9	0.94411	-0.0575125	0.63774	-0.287876	0.172851	0.117533	0.749854	1.18869
Ulcerative colitis	IL1R1	MR Egger	16	0.895926	-0.109898	0.135885	-0.246022	0.026226	0.0694509	0.781905	1.02657
Ulcerative colitis	IL1R1	Weighted median	16	0.991229	-0.00880959	0.850966	-0.10071	0.0830909	0.046888	0.904195	1.08664
Ulcerative colitis	IL1R1	Inverse variance weighted	16	0.966907	-0.0336532	0.334913	-0.102058	0.0347515	0.0349003	0.902977	1.03536
Ulcerative colitis	IL1R1	Simple mode	16	1.03061	0.0301494	0.725887	-0.135265	0.195563	0.0843949	0.873485	1.216
Ulcerative colitis	IL1R1	Weighted mode	16	1.0219	0.0216657	0.795042	-0.13892	0.182252	0.0819317	0.870297	1.19992
Ulcerative colitis	IL1R2	MR Egger	13	1.16112	0.149389	0.0574373	0.0113613	0.287416	0.0704221	1.01143	1.33298
Ulcerative colitis	IL1R2	Weighted median	13	1.11583	0.109596	0.000254851	0.0508626	0.16833	0.0299662	1.05218	1.18333
Ulcerative colitis	IL1R2	Inverse variance weighted	13	1.0577	0.0561014	0.110263	-0.00664834	0.118851	0.0320152	0.993374	1.1262
Ulcerative colitis	IL1R2	Simple mode	13	1.07985	0.0768262	0.205254	-0.035596	0.189248	0.0573582	0.96503	1.20834
Ulcerative colitis	IL1R2	Weighted mode	13	1.13722	0.128591	0.00111255	0.0693917	0.187791	0.030204	1.07186	1.20658
Ulcerative colitis	IL1RAP	MR Egger	14	0.977827	-0.0224227	0.342055	-0.0668474	0.022002	0.0226657	0.935338	1.02225
Ulcerative colitis	IL1RAP	Weighted median	14	0.975504	-0.0248009	0.193214	-0.0621607	0.0125588	0.0190611	0.939732	1.01264
Ulcerative colitis	IL1RAP	Inverse variance weighted	14	0.978571	-0.0216618	0.201871	-0.0549292	0.0116056	0.0169732	0.946552	1.01167
Ulcerative colitis	IL1RAP	Simple mode	14	0.945048	-0.05652	0.22728	-0.143934	0.0308936	0.0445988	0.865945	1.03138
Ulcerative colitis	IL1RAP	Weighted mode	14	0.976132	-0.024157	0.221195	-0.0610017	0.0126878	0.0187983	0.940822	1.01277
Ulcerative colitis	IL1RAPL2	MR Egger	12	0.959006	-0.0418583	0.645545	-0.214872	0.131155	0.0882722	0.806645	1.14014
Ulcerative colitis	IL1RAPL2	Weighted median	12	0.953701	-0.0474048	0.355158	-0.147892	0.0530821	0.0512688	0.862525	1.05452
Ulcerative colitis	IL1RAPL2	Inverse variance weighted	12	0.960547	-0.0402524	0.317076	-0.119109	0.038604	0.0402329	0.887711	1.03936
Ulcerative colitis	IL1RAPL2	Simple mode	12	0.94816	-0.0532316	0.487052	-0.198314	0.0918503	0.0740214	0.820113	1.0962
Ulcerative colitis	IL1RAPL2	Weighted mode	12	0.95284	-0.0483087	0.501282	-0.184484	0.0878668	0.0694773	0.831533	1.09184
Ulcerative colitis	IL1RL1	MR Egger	15	1.10227	0.0973699	0.00143181	0.0500019	0.144738	0.0241673	1.05127	1.15574
Ulcerative colitis	IL1RL1	Weighted median	15	1.06297	0.0610645	0.000662612	0.0259102	0.0962188	0.0179359	1.02625	1.101
Ulcerative colitis	IL1RL1	Inverse variance weighted	15	1.04607	0.0450386	0.00839438	0.0115473	0.0785299	0.0170874	1.01161	1.0817
Ulcerative colitis	IL1RL1	Simple mode	15	0.957781	-0.0431366	0.552985	-0.182217	0.095944	0.0709595	0.83342	1.1007
Ulcerative colitis	IL1RL1	Weighted mode	15	1.07823	0.0753176	0.00165018	0.0373183	0.113317	0.0193874	1.03802	1.11999
Ulcerative colitis	IL1RL2	MR Egger	9	0.878173	-0.129912	0.418181	-0.425932	0.166109	0.151031	0.653161	1.1807
Ulcerative colitis	IL1RL2	Weighted median	9	1.01092	0.0108608	0.873102	-0.122418	0.14414	0.0679994	0.884778	1.15505
Ulcerative colitis	IL1RL2	Inverse variance weighted	9	1.00611	0.00609073	0.907906	-0.0971061	0.109288	0.0526514	0.90746	1.11548
Ulcerative colitis	IL1RL2	Simple mode	9	0.878683	-0.129331	0.351729	-0.385695	0.127034	0.130798	0.679978	1.13546
Ulcerative colitis	IL1RL2	Weighted mode	9	1.10523	0.10005	0.468511	-0.157646	0.357747	0.131478	0.854152	1.4301
Ulcerative colitis	IL1RN	MR Egger	11	0.964599	-0.0360432	0.805046	-0.313942	0.241855	0.141785	0.730562	1.27361
Ulcerative colitis	IL1RN	Weighted median	11	0.964093	-0.0365674	0.478329	-0.137657	0.0645226	0.0515765	0.871397	1.06665
Ulcerative colitis	IL1RN	Inverse variance weighted	11	0.985866	-0.0142346	0.775999	-0.112288	0.0838191	0.0500274	0.893786	1.08743
Ulcerative colitis	IL1RN	Simple mode	11	0.956382	-0.0445982	0.53052	-0.179139	0.0899427	0.0686433	0.83599	1.09411
Ulcerative colitis	IL1RN	Weighted mode	11	0.960465	-0.0403381	0.566672	-0.173777	0.0931013	0.0680813	0.840484	1.09757
Ulcerative colitis	IL20	MR Egger	5	1.04315	0.0422482	0.806584	-0.267578	0.352074	0.158075	0.765231	1.42201
Ulcerative colitis	IL20	Weighted median	5	1.04735	0.0462613	0.530435	-0.0982726	0.190795	0.0737418	0.906402	1.21021
Ulcerative colitis	IL20	Inverse variance weighted	5	1.02134	0.0211172	0.723869	-0.096037	0.138272	0.0597726	0.90843	1.14829
Ulcerative colitis	IL20	Simple mode	5	1.06603	0.0639375	0.56141	-0.134192	0.262067	0.101087	0.874422	1.29961
Ulcerative colitis	IL20	Weighted mode	5	1.06043	0.0586723	0.604549	-0.146205	0.263549	0.104529	0.863981	1.30154
Ulcerative colitis	IL21	MR Egger	3	1.60994	0.476199	0.340936	-0.0776372	1.03004	0.28257	0.9253	2.80117
Ulcerative colitis	IL21	Weighted median	3	1.16699	0.154429	0.00286136	0.052935	0.255923	0.0517827	1.05436	1.29165
Ulcerative colitis	IL21	Inverse variance weighted	3	1.1564	0.145313	0.202931	-0.0783781	0.369005	0.114128	0.924615	1.44629
Ulcerative colitis	IL21	Simple mode	3	1.14262	0.133324	0.33657	-0.0750745	0.341723	0.106326	0.927674	1.40737
Ulcerative colitis	IL21	Weighted mode	3	1.17919	0.164826	0.136375	0.0314776	0.298174	0.0680349	1.03198	1.3474
Ulcerative colitis	IL22	MR Egger	13	0.923999	-0.0790438	0.480317	-0.291107	0.13302	0.108196	0.747436	1.14227
Ulcerative colitis	IL22	Weighted median	13	1.06646	0.0643464	0.232589	-0.041306	0.169999	0.0539043	0.959535	1.1853
Ulcerative colitis	IL22	Inverse variance weighted	13	1.05914	0.0574561	0.145534	-0.0199157	0.134828	0.0394754	0.980281	1.14434
Ulcerative colitis	IL22	Simple mode	13	0.936712	-0.0653799	0.545718	-0.271472	0.140713	0.105149	0.762256	1.15109
Ulcerative colitis	IL22	Weighted mode	13	1.16267	0.150721	0.134629	-0.0334182	0.33486	0.0939486	0.967134	1.39774
Ulcerative colitis	IL2	MR Egger	15	0.875349	-0.133132	0.228378	-0.33955	0.073285	0.105315	0.712091	1.07604
Ulcerative colitis	IL2	Weighted median	15	0.945872	-0.0556475	0.236001	-0.147686	0.0363908	0.0469583	0.862702	1.03706
Ulcerative colitis	IL2	Inverse variance weighted	15	0.969383	-0.0310957	0.351814	-0.0965549	0.0343635	0.0333976	0.90796	1.03496
Ulcerative colitis	IL2	Simple mode	15	0.93248	-0.0699078	0.431364	-0.239019	0.0992032	0.0862811	0.7874	1.10429
Ulcerative colitis	IL2	Weighted mode	15	0.914555	-0.0893178	0.246645	-0.234104	0.0554689	0.0738707	0.791279	1.05704
Ulcerative colitis	IL24	MR Egger	15	1.01543	0.0153156	0.898975	-0.21656	0.247191	0.118304	0.805284	1.28042
Ulcerative colitis	IL24	Weighted median	15	0.979045	-0.0211781	0.704873	-0.130773	0.0884166	0.0559157	0.877417	1.09244
Ulcerative colitis	IL24	Inverse variance weighted	15	0.941537	-0.0602417	0.190286	-0.150393	0.0299092	0.0459954	0.86037	1.03036
Ulcerative colitis	IL24	Simple mode	15	1.04581	0.0447935	0.693111	-0.173118	0.262705	0.111179	0.841039	1.30044
Ulcerative colitis	IL24	Weighted mode	15	1.02168	0.0214451	0.829021	-0.169582	0.212472	0.0974627	0.844018	1.23673
Ulcerative colitis	IL25	MR Egger	15	1.04376	0.0428283	0.192652	-0.0182635	0.10392	0.0311693	0.981902	1.10951
Ulcerative colitis	IL25	Weighted median	15	1.02771	0.0273331	0.244977	-0.0187457	0.073412	0.0235096	0.981429	1.07617
Ulcerative colitis	IL25	Inverse variance weighted	15	0.997727	-0.00227517	0.917108	-0.0451215	0.0405711	0.0218604	0.955881	1.04141
Ulcerative colitis	IL25	Simple mode	15	0.953492	-0.0476245	0.585459	-0.214818	0.119569	0.0853027	0.806688	1.12701
Ulcerative colitis	IL25	Weighted mode	15	1.02684	0.0264827	0.274995	-0.0192059	0.0721713	0.0233105	0.980977	1.07484
Ulcerative colitis	IL27	MR Egger	17	1.17057	0.15749	0.228795	-0.0885339	0.403513	0.125522	0.915272	1.49707
Ulcerative colitis	IL27	Weighted median	17	1.0642	0.0622198	0.198061	-0.0325291	0.156969	0.0483413	0.967994	1.16996
Ulcerative colitis	IL27	Inverse variance weighted	17	1.0942	0.0900198	0.0164754	0.0246599	0.15538	0.0333469	1.02497	1.1681
Ulcerative colitis	IL27	Simple mode	17	1.15351	0.142806	0.12602	-0.0305877	0.3162	0.0884662	0.969875	1.3719
Ulcerative colitis	IL27	Weighted mode	17	1.09085	0.086955	0.335756	-0.0847752	0.258685	0.0876174	0.918719	1.29523
Ulcerative colitis	IL27RA	MR Egger	10	1.06531	0.063264	0.0902815	-0.00111809	0.127646	0.032848	0.998883	1.13615
Ulcerative colitis	IL27RA	Weighted median	10	1.07231	0.0698171	0.00322181	0.0233631	0.116271	0.023701	1.02364	1.1233
Ulcerative colitis	IL27RA	Inverse variance weighted	10	1.04605	0.0450194	0.0376729	0.00256453	0.0874743	0.0216606	1.00257	1.09141
Ulcerative colitis	IL27RA	Simple mode	10	1.0426	0.0417218	0.512305	-0.078153	0.161597	0.0611606	0.924823	1.17539
Ulcerative colitis	IL27RA	Weighted mode	10	1.06744	0.0652608	0.0160334	0.022006	0.108516	0.0220687	1.02225	1.11462
Ulcerative colitis	IL2RA	MR Egger	7	0.900954	-0.104301	0.784638	-0.813225	0.604623	0.361696	0.443426	1.83056
Ulcerative colitis	IL2RA	Weighted median	7	0.958902	-0.0419662	0.565648	-0.185147	0.101215	0.0730516	0.830982	1.10651
Ulcerative colitis	IL2RA	Inverse variance weighted	7	1.00844	0.00840698	0.888588	-0.109214	0.126028	0.0600109	0.896538	1.13431
Ulcerative colitis	IL2RA	Simple mode	7	0.927495	-0.0752682	0.554718	-0.311148	0.160612	0.120347	0.732605	1.17423
Ulcerative colitis	IL2RA	Weighted mode	7	0.915273	-0.0885326	0.461999	-0.309419	0.132353	0.112697	0.733874	1.14151
Ulcerative colitis	IL2RB	MR Egger	12	0.905456	-0.0993165	0.558542	-0.420974	0.222341	0.164111	0.656407	1.249
Ulcerative colitis	IL2RB	Weighted median	12	0.97498	-0.0253385	0.674983	-0.143777	0.0930999	0.0604278	0.866081	1.09757
Ulcerative colitis	IL2RB	Inverse variance weighted	12	0.977447	-0.0228112	0.628661	-0.112434	0.0668113	0.0457258	0.893657	1.06909
Ulcerative colitis	IL2RB	Simple mode	12	1.03	0.0295625	0.782227	-0.174984	0.234109	0.10436	0.839471	1.26378
Ulcerative colitis	IL2RB	Weighted mode	12	0.962083	-0.0386549	0.689522	-0.223346	0.146036	0.0942301	0.799838	1.15724
Ulcerative colitis	IL31	MR Egger	11	0.978937	-0.0212875	0.775115	-0.163002	0.120427	0.0723031	0.84959	1.12798
Ulcerative colitis	IL31	Weighted median	11	0.986499	-0.0135932	0.689555	-0.0802904	0.0531039	0.0340291	0.922848	1.05454
Ulcerative colitis	IL31	Inverse variance weighted	11	0.978579	-0.0216535	0.452767	-0.0781804	0.0348734	0.0288403	0.924798	1.03549
Ulcerative colitis	IL31	Simple mode	11	1.037	0.0363316	0.635785	-0.109465	0.182128	0.0743859	0.896314	1.19977
Ulcerative colitis	IL31	Weighted mode	11	0.990336	-0.00971053	0.798882	-0.082444	0.063023	0.0371089	0.920863	1.06505
Ulcerative colitis	IL32	MR Egger	12	0.944763	-0.0568207	0.539598	-0.232166	0.118525	0.0894619	0.792815	1.12583
Ulcerative colitis	IL32	Weighted median	12	0.995598	-0.0044114	0.935053	-0.110516	0.101693	0.054135	0.895372	1.10704
Ulcerative colitis	IL32	Inverse variance weighted	12	0.971785	-0.0286208	0.507607	-0.113286	0.0560448	0.0431967	0.892895	1.05765
Ulcerative colitis	IL32	Simple mode	12	1.02159	0.0213598	0.808389	-0.147169	0.189889	0.0859841	0.863148	1.20911
Ulcerative colitis	IL32	Weighted mode	12	1.0145	0.0143995	0.869026	-0.152809	0.181608	0.0853106	0.858293	1.19914
Ulcerative colitis	IL34	MR Egger	13	1.0476	0.0465013	0.56325	-0.106427	0.19943	0.0780247	0.89904	1.22071
Ulcerative colitis	IL34	Weighted median	13	0.950531	-0.0507342	0.306541	-0.147985	0.0465161	0.0496175	0.862444	1.04761
Ulcerative colitis	IL34	Inverse variance weighted	13	0.971634	-0.0287765	0.464758	-0.10593	0.0483771	0.0393641	0.899488	1.04957
Ulcerative colitis	IL34	Simple mode	13	0.923974	-0.0790717	0.430426	-0.269009	0.110866	0.096907	0.764136	1.11725
Ulcerative colitis	IL34	Weighted mode	13	0.937717	-0.0643074	0.479796	-0.237128	0.108513	0.0881736	0.788891	1.11462
Ulcerative colitis	IL3	MR Egger	9	0.942014	-0.0597356	0.632978	-0.294299	0.174828	0.119675	0.745053	1.19104
Ulcerative colitis	IL3	Weighted median	9	0.928417	-0.0742742	0.209598	-0.190302	0.0417541	0.0591981	0.826709	1.04264
Ulcerative colitis	IL3	Inverse variance weighted	9	0.934735	-0.067492	0.129472	-0.15474	0.019756	0.0445143	0.856638	1.01995
Ulcerative colitis	IL3	Simple mode	9	0.882123	-0.125424	0.250246	-0.323735	0.0728877	0.101179	0.723442	1.07561
Ulcerative colitis	IL3	Weighted mode	9	1.02559	0.0252714	0.800611	-0.164433	0.214976	0.0967881	0.848374	1.23983
Ulcerative colitis	IL36 alpha	MR Egger	9	1.09736	0.092909	0.340069	-0.0849857	0.270804	0.0907626	0.918525	1.31102
Ulcerative colitis	IL36 alpha	Weighted median	9	0.979326	-0.0208912	0.626686	-0.105075	0.0632925	0.0429509	0.900257	1.06534
Ulcerative colitis	IL36 alpha	Inverse variance weighted	9	0.975472	-0.0248334	0.563896	-0.10918	0.0595133	0.043034	0.896569	1.06132
Ulcerative colitis	IL36 alpha	Simple mode	9	0.969479	-0.030997	0.659711	-0.16389	0.101896	0.0678026	0.848835	1.10727
Ulcerative colitis	IL36 alpha	Weighted mode	9	0.975463	-0.0248432	0.601859	-0.1145	0.0648134	0.0457432	0.891812	1.06696
Ulcerative colitis	IL36 beta	MR Egger	14	1.0909	0.0870039	0.282077	-0.0644073	0.238415	0.0772506	0.937623	1.26924
Ulcerative colitis	IL36 beta	Weighted median	14	1.04677	0.0457057	0.384099	-0.0572198	0.148631	0.052513	0.944386	1.16024
Ulcerative colitis	IL36 beta	Inverse variance weighted	14	1.01303	0.0129472	0.724201	-0.0589716	0.084866	0.0366933	0.942734	1.08857
Ulcerative colitis	IL36 beta	Simple mode	14	1.06138	0.0595684	0.546744	-0.129112	0.248249	0.0962655	0.878875	1.28178
Ulcerative colitis	IL36 beta	Weighted mode	14	1.07531	0.0726081	0.451195	-0.1106	0.255817	0.0934738	0.895296	1.29152
Ulcerative colitis	IL36 gamma	MR Egger	8	0.854513	-0.157223	0.397791	-0.495772	0.181325	0.172729	0.609101	1.1988
Ulcerative colitis	IL36 gamma	Weighted median	8	0.913824	-0.0901175	0.190771	-0.225125	0.0448899	0.0688813	0.798417	1.04591
Ulcerative colitis	IL36 gamma	Inverse variance weighted	8	0.947512	-0.0539153	0.389455	-0.176705	0.0688748	0.062648	0.838027	1.0713
Ulcerative colitis	IL36 gamma	Simple mode	8	0.889367	-0.117245	0.307533	-0.326069	0.0915787	0.106543	0.721756	1.0959
Ulcerative colitis	IL36 gamma	Weighted mode	8	0.897358	-0.1083	0.257318	-0.280434	0.0638339	0.0878235	0.755456	1.06592
Ulcerative colitis	IL37	MR Egger	12	0.988244	-0.0118252	0.915395	-0.224552	0.200902	0.108534	0.798874	1.22251
Ulcerative colitis	IL37	Weighted median	12	1.0592	0.0575162	0.293601	-0.0498213	0.164854	0.054764	0.951399	1.17922
Ulcerative colitis	IL37	Inverse variance weighted	12	1.03599	0.0353619	0.412208	-0.0491601	0.119884	0.0431235	0.952029	1.12737
Ulcerative colitis	IL37	Simple mode	12	0.9106	-0.0936518	0.350349	-0.281849	0.094545	0.0960188	0.754388	1.09916
Ulcerative colitis	IL37	Weighted mode	12	1.08853	0.0848282	0.364845	-0.0910704	0.260727	0.0897442	0.912953	1.29787
Ulcerative colitis	IL3RA	MR Egger	11	0.94114	-0.0606634	0.64497	-0.310113	0.188786	0.12727	0.733364	1.20778
Ulcerative colitis	IL3RA	Weighted median	11	0.974434	-0.025899	0.640729	-0.134672	0.0828736	0.0554962	0.874003	1.0864
Ulcerative colitis	IL3RA	Inverse variance weighted	11	0.954297	-0.0467801	0.13192	-0.102118	0.00855771	0.0282336	0.902923	1.00859
Ulcerative colitis	IL3RA	Simple mode	11	0.905379	-0.0994011	0.215739	-0.246818	0.0480161	0.0752129	0.781283	1.04919
Ulcerative colitis	IL3RA	Weighted mode	11	0.960988	-0.039793	0.58068	-0.176413	0.0968274	0.0697043	0.838271	1.10167
Ulcerative colitis	IL4	MR Egger	15	1.0066	0.00657354	0.942678	-0.169182	0.182329	0.0896714	0.844355	1.20001
Ulcerative colitis	IL4	Weighted median	15	0.997145	-0.00285942	0.95153	-0.0950591	0.0893403	0.0470407	0.909319	1.09345
Ulcerative colitis	IL4	Inverse variance weighted	15	1.00856	0.00852384	0.815832	-0.0632067	0.0802544	0.0365972	0.938749	1.08356
Ulcerative colitis	IL4	Simple mode	15	1.01712	0.0169782	0.819285	-0.125965	0.159921	0.0729302	0.881646	1.17342
Ulcerative colitis	IL4	Weighted mode	15	1.01896	0.0187814	0.797873	-0.122245	0.159807	0.0719521	0.884932	1.17328
Ulcerative colitis	IL4RA	MR Egger	11	0.950636	-0.0506239	0.781464	-0.39774	0.296492	0.1771	0.671837	1.34513
Ulcerative colitis	IL4RA	Weighted median	11	0.98424	-0.0158851	0.788734	-0.132079	0.100309	0.0592827	0.876272	1.10551
Ulcerative colitis	IL4RA	Inverse variance weighted	11	0.968305	-0.0322085	0.532195	-0.13327	0.0688526	0.0515618	0.875229	1.07128
Ulcerative colitis	IL4RA	Simple mode	11	0.957703	-0.0432176	0.676623	-0.240411	0.153976	0.100609	0.786305	1.16646
Ulcerative colitis	IL4RA	Weighted mode	11	0.980976	-0.0192076	0.848349	-0.211044	0.172629	0.0978756	0.809739	1.18842
Ulcerative colitis	IL5	MR Egger	9	1.34122	0.293579	0.222466	-0.136207	0.723364	0.219278	0.872662	2.06136
Ulcerative colitis	IL5	Weighted median	9	1.05255	0.0512149	0.409077	-0.0703827	0.172812	0.0620396	0.932037	1.18864
Ulcerative colitis	IL5	Inverse variance weighted	9	1.05773	0.0561284	0.292757	-0.0484362	0.160693	0.0533493	0.952718	1.17432
Ulcerative colitis	IL5	Simple mode	9	1.17445	0.1608	0.185735	-0.0569067	0.378507	0.111075	0.944682	1.4601
Ulcerative colitis	IL5	Weighted mode	9	1.15807	0.146757	0.259766	-0.0903976	0.383912	0.120997	0.913568	1.46802
Ulcerative colitis	IL5RA	MR Egger	10	1.26513	0.235171	0.0480575	0.0374625	0.43288	0.100872	1.03817	1.54169
Ulcerative colitis	IL5RA	Weighted median	10	1.02791	0.0275232	0.616616	-0.0802273	0.135274	0.0549747	0.922907	1.14485
Ulcerative colitis	IL5RA	Inverse variance weighted	10	1.00546	0.0054457	0.913235	-0.0925141	0.103405	0.0499795	0.911636	1.10894
Ulcerative colitis	IL5RA	Simple mode	10	1.02902	0.0286034	0.754858	-0.145543	0.20275	0.0888501	0.864553	1.22477
Ulcerative colitis	IL5RA	Weighted mode	10	1.02902	0.0286034	0.673459	-0.100129	0.157336	0.0656798	0.904721	1.17039
Ulcerative colitis	IL6	MR Egger	12	1.00757	0.007544	0.958135	-0.267167	0.282255	0.140159	0.765545	1.32612
Ulcerative colitis	IL6	Weighted median	12	0.966529	-0.034044	0.574823	-0.152993	0.0849054	0.0606885	0.858135	1.08861
Ulcerative colitis	IL6	Inverse variance weighted	12	0.973426	-0.0269338	0.662583	-0.147915	0.0940478	0.0617253	0.862504	1.09861
Ulcerative colitis	IL6	Simple mode	12	1.00033	0.000329018	0.997815	-0.229894	0.230552	0.117461	0.794618	1.2593
Ulcerative colitis	IL6	Weighted mode	12	0.984039	-0.0160895	0.883308	-0.226015	0.193836	0.107105	0.797706	1.2139
Ulcerative colitis	IL6RA	MR Egger	9	1.1025	0.0975796	0.107198	-0.00595583	0.201115	0.0528242	0.994062	1.22277
Ulcerative colitis	IL6RA	Weighted median	9	0.99944	-0.000560609	0.977394	-0.0393372	0.0382159	0.019784	0.961426	1.03896
Ulcerative colitis	IL6RA	Inverse variance weighted	9	0.988829	-0.0112344	0.773221	-0.0876468	0.0651781	0.0389859	0.916084	1.06735
Ulcerative colitis	IL6RA	Simple mode	9	0.990312	-0.00973528	0.881222	-0.133427	0.113956	0.0631079	0.875091	1.1207
Ulcerative colitis	IL6RA	Weighted mode	9	1.00257	0.00257014	0.897246	-0.0352193	0.0403596	0.0192803	0.965394	1.04119
Ulcerative colitis	IL6RB	MR Egger	10	0.971831	-0.0285736	0.75067	-0.198847	0.141699	0.086874	0.819676	1.15223
Ulcerative colitis	IL6RB	Weighted median	10	0.977557	-0.0226991	0.628108	-0.114547	0.0691487	0.0468611	0.89177	1.0716
Ulcerative colitis	IL6RB	Inverse variance weighted	10	0.988801	-0.0112626	0.748929	-0.0802347	0.0577096	0.0351899	0.9229	1.05941
Ulcerative colitis	IL6RB	Simple mode	10	0.957208	-0.0437347	0.530417	-0.175115	0.0876457	0.0670308	0.83936	1.0916
Ulcerative colitis	IL6RB	Weighted mode	10	0.976309	-0.0239759	0.663543	-0.128468	0.0805159	0.0533121	0.879442	1.08385
Ulcerative colitis	IL7	MR Egger	14	0.901796	-0.103367	0.295943	-0.288766	0.0820313	0.0945911	0.749188	1.08549
Ulcerative colitis	IL7	Weighted median	14	0.995641	-0.00436807	0.93156	-0.104056	0.0953201	0.0508613	0.901175	1.10001
Ulcerative colitis	IL7	Inverse variance weighted	14	1.02571	0.0253817	0.498716	-0.0481545	0.0989179	0.0375185	0.952987	1.10398
Ulcerative colitis	IL7	Simple mode	14	0.977444	-0.0228146	0.790823	-0.187963	0.142334	0.0842595	0.828645	1.15296
Ulcerative colitis	IL7	Weighted mode	14	0.979283	-0.0209343	0.806929	-0.185437	0.143569	0.0839301	0.830741	1.15439
Ulcerative colitis	IL7RA	MR Egger	12	1.07206	0.0695838	0.476361	-0.11474	0.253907	0.0940425	0.891598	1.28905
Ulcerative colitis	IL7RA	Weighted median	12	1.07686	0.0740459	0.088275	-0.0110959	0.159188	0.0434397	0.988965	1.17256
Ulcerative colitis	IL7RA	Inverse variance weighted	12	1.05296	0.0516019	0.1115	-0.0119486	0.115153	0.0324238	0.988122	1.12204
Ulcerative colitis	IL7RA	Simple mode	12	1.04689	0.0458221	0.543744	-0.0975227	0.189167	0.0731351	0.907082	1.20824
Ulcerative colitis	IL7RA	Weighted mode	12	1.08375	0.0804312	0.124587	-0.0143856	0.175248	0.0483759	0.985717	1.19154
Ulcerative colitis	IL9	MR Egger	10	0.990825	-0.00921776	0.929728	-0.207748	0.189313	0.101291	0.812412	1.20842
Ulcerative colitis	IL9	Weighted median	10	0.964217	-0.036439	0.547846	-0.155277	0.0823987	0.0606315	0.856178	1.08589
Ulcerative colitis	IL9	Inverse variance weighted	10	1.00601	0.00599599	0.894617	-0.082723	0.0947149	0.0452648	0.920606	1.09935
Ulcerative colitis	IL9	Simple mode	10	0.93081	-0.0716998	0.496377	-0.269957	0.126557	0.101152	0.763412	1.13491
Ulcerative colitis	IL9	Weighted mode	10	0.933064	-0.0692818	0.494944	-0.2602	0.121637	0.0974074	0.770897	1.12934
Ulcerative colitis	IL8	MR Egger	15	1.13058	0.122728	0.316245	-0.108045	0.3535	0.117741	0.897588	1.42404
Ulcerative colitis	IL8	Weighted median	15	0.986208	-0.0138882	0.79175	-0.116983	0.0892061	0.0525991	0.889601	1.09331
Ulcerative colitis	IL8	Inverse variance weighted	15	1.02977	0.0293367	0.50829	-0.0575864	0.11626	0.0443485	0.94404	1.12329
Ulcerative colitis	IL8	Simple mode	15	0.955657	-0.0453566	0.662398	-0.24467	0.153956	0.10169	0.782963	1.16644
Ulcerative colitis	IL8	Weighted mode	15	0.948167	-0.0532245	0.59631	-0.245681	0.139232	0.0981919	0.782172	1.14939
Ulcerative colitis	ILF3	MR Egger	5	0.877878	-0.130247	0.604115	-0.572329	0.311834	0.225552	0.56421	1.36593
Ulcerative colitis	ILF3	Weighted median	5	0.995845	-0.00416393	0.959504	-0.164894	0.156566	0.0820051	0.847984	1.16949
Ulcerative colitis	ILF3	Inverse variance weighted	5	1.01168	0.0116169	0.852297	-0.110673	0.133907	0.062393	0.895231	1.14329
Ulcerative colitis	ILF3	Simple mode	5	0.966329	-0.0342512	0.752663	-0.233125	0.164622	0.101466	0.792055	1.17895
Ulcerative colitis	ILF3	Weighted mode	5	0.973738	-0.0266131	0.803842	-0.223177	0.169951	0.100288	0.799973	1.18525
Ulcerative colitis	TIRAP	MR Egger	13	0.954377	-0.0466968	0.276305	-0.126596	0.0332022	0.0407648	0.88109	1.03376
Ulcerative colitis	TIRAP	Weighted median	13	0.955803	-0.0452036	0.16371	-0.10882	0.0184131	0.0324575	0.896892	1.01858
Ulcerative colitis	TIRAP	Inverse variance weighted	13	0.98694	-0.0131462	0.609416	-0.0635792	0.0372868	0.0257311	0.9384	1.03799
Ulcerative colitis	TIRAP	Simple mode	13	0.958813	-0.0420592	0.535166	-0.171175	0.0870565	0.0658754	0.842674	1.09096
Ulcerative colitis	TIRAP	Weighted mode	13	0.956491	-0.0444838	0.188488	-0.107013	0.0180455	0.0319027	0.898514	1.01821
