# Supplementary material for: Causal Effects of AL Amyloidosis on Autoimmune Diseases and the Role of Inflammatory Cytokines: Insights from Mendelian Randomization
Source: Research Square preprint supplement (doi:10.21203/rs.3.rs-7503974/v1), 2025-10-15
Supplement: Supplementary file 4 [file 9349f16bdfd1218586d48e07.xlsx]

## Sheet: Multiple sclerosis
SNP	effect_allele.exposure	other_allele.exposure	effect_allele.outcome	other_allele.outcome	beta.exposure	beta.outcome	eaf.exposure	eaf.outcome	remove	palindromic	ambiguous	id.outcome	chr	pos	se.outcome	samplesize.outcome	pval.outcome	outcome	originalname.outcome	outcome.deprecated	mr_keep.outcome	data_source.outcome	proxy.outcome	target_snp.outcome	proxy_snp.outcome	target_a1.outcome	target_a2.outcome	proxy_a1.outcome	proxy_a2.outcome	chr.exposure	pos.exposure	pval.exposure	se.exposure	samplesize.exposure	exposure	mr_keep.exposure	pval_origin.exposure	id.exposure	data_source.exposure	action	SNP_index	mr_keep
rs1005300	G	C	G	C	0.241108	0.0199007	0.59		FALSE	TRUE	TRUE	ieu-b-18	22	39553003	0.0166288	115803	0.2314	multiple sclerosis || id:ieu-b-18	multiple sclerosis	multiple sclerosis || ||	TRUE	igd	TRUE	rs1005300	rs139412	C	G	G	A	22	39151886	8e-08	0.0475985	8755	exposure	TRUE	reported	bi3ZwN	textfile	2	1	FALSE
rs10799599	C	G	C	G	0.218828	0.00458945	0.62		FALSE	TRUE	TRUE	ieu-b-18	1	20294500	0.016759	115803	0.7842	multiple sclerosis || id:ieu-b-18	multiple sclerosis	multiple sclerosis || ||	TRUE	igd								1	19968007	1e-06	0.0483525	8755	exposure	TRUE	reported	bi3ZwN	textfile	2	1	FALSE
rs11219122	C	T	C	T	0.211283	-0.00299551	0.35		FALSE	FALSE	FALSE	ieu-b-18	11	123246154	0.0177521	115803	0.866	multiple sclerosis || id:ieu-b-18	multiple sclerosis	multiple sclerosis || ||	TRUE	igd	TRUE	rs11219122	rs10893032	C	T	A	G	11	123369465	2e-06	0.0468833	8755	exposure	TRUE	reported	bi3ZwN	textfile	2	1	TRUE
rs2273156	C	T	C	T	0.241108	-0.0501226	0.19		FALSE	FALSE	FALSE	ieu-b-18	14	35438799	0.0209606	115803	0.01679	multiple sclerosis || id:ieu-b-18	multiple sclerosis	multiple sclerosis || ||	TRUE	igd								14	34969593	3e-06	0.055159	8755	exposure	TRUE	reported	bi3ZwN	textfile	2	1	TRUE
rs35629860	A	G	A	G	0.218828	-0.0106432	0.26		FALSE	FALSE	FALSE	ieu-b-18	16	30671532	0.0193965	115803	0.583201	multiple sclerosis || id:ieu-b-18	multiple sclerosis	multiple sclerosis || ||	TRUE	igd								16	30660211	4e-06	0.0505805	8755	exposure	TRUE	reported	bi3ZwN	textfile	2	1	TRUE
rs4792800	G	A	G	A	0.291142	0.0377019	0.12		FALSE	FALSE	FALSE	ieu-b-18	17	16845167	0.0273725	115803	0.1684	multiple sclerosis || id:ieu-b-18	multiple sclerosis	multiple sclerosis || ||	TRUE	igd								17	16941853	2e-06	0.063638	8755	exposure	TRUE	reported	bi3ZwN	textfile	2	1	TRUE
rs79419269	C	T	C	T	0.325328	-0.0196065	0.12		FALSE	FALSE	FALSE	ieu-b-18	7	150947689	0.0262084	115803	0.4544	multiple sclerosis || id:ieu-b-18	multiple sclerosis	multiple sclerosis || ||	TRUE	igd	TRUE	rs79419269	rs73169671	C	T	A	C	7	151239990	5e-08	0.0629745	8755	exposure	TRUE	reported	bi3ZwN	textfile	2	1	TRUE

## Sheet: Type 1 diabetes
SNP	effect_allele.exposure	other_allele.exposure	effect_allele.outcome	other_allele.outcome	beta.exposure	beta.outcome	eaf.exposure	eaf.outcome	remove	palindromic	ambiguous	id.outcome	chr	pos	se.outcome	samplesize.outcome	pval.outcome	outcome	originalname.outcome	outcome.deprecated	mr_keep.outcome	data_source.outcome	chr.exposure	pos.exposure	pval.exposure	se.exposure	samplesize.exposure	exposure	mr_keep.exposure	pval_origin.exposure	id.exposure	data_source.exposure	action	SNP_index	mr_keep
rs1005300	G	C	G	C	0.241108	0.063378	0.59	0.596	FALSE	TRUE	FALSE	ebi-a-GCST90014023	22	39547891	0.0376	520580	0.0919009	Type 1 diabetes || id:ebi-a-GCST90014023	Type 1 diabetes	Type 1 diabetes || ||	TRUE	igd	22	39151886	8e-08	0.0475985	8755	exposure	TRUE	reported	bi3ZwN	textfile	2	1	TRUE
rs10799599	C	G	C	G	0.218828	-0.021891	0.62	0.598	FALSE	TRUE	FALSE	ebi-a-GCST90014023	1	20294500	0.014609	520580	0.134	Type 1 diabetes || id:ebi-a-GCST90014023	Type 1 diabetes	Type 1 diabetes || ||	TRUE	igd	1	19968007	1e-06	0.0483525	8755	exposure	TRUE	reported	bi3ZwN	textfile	2	1	TRUE
rs11219122	C	T	C	T	0.211283	-0.014643	0.35	0.337	FALSE	FALSE	FALSE	ebi-a-GCST90014023	11	123240173	0.016175	520580	0.365	Type 1 diabetes || id:ebi-a-GCST90014023	Type 1 diabetes	Type 1 diabetes || ||	TRUE	igd	11	123369465	2e-06	0.0468833	8755	exposure	TRUE	reported	bi3ZwN	textfile	2	1	TRUE
rs2273156	C	T	C	T	0.241108	-0.036245	0.19	0.191	FALSE	FALSE	FALSE	ebi-a-GCST90014023	14	35438799	0.01795	520580	0.0435001	Type 1 diabetes || id:ebi-a-GCST90014023	Type 1 diabetes	Type 1 diabetes || ||	TRUE	igd	14	34969593	3e-06	0.055159	8755	exposure	TRUE	reported	bi3ZwN	textfile	2	1	TRUE
rs35629860	A	G	A	G	0.218828	0.049323	0.26	0.252	FALSE	FALSE	FALSE	ebi-a-GCST90014023	16	30671532	0.016153	520580	0.00226001	Type 1 diabetes || id:ebi-a-GCST90014023	Type 1 diabetes	Type 1 diabetes || ||	TRUE	igd	16	30660211	4e-06	0.0505805	8755	exposure	TRUE	reported	bi3ZwN	textfile	2	1	TRUE
rs4792800	G	A	G	A	0.291142	0.029051	0.12	0.101	FALSE	FALSE	FALSE	ebi-a-GCST90014023	17	16845167	0.022815	520580	0.203	Type 1 diabetes || id:ebi-a-GCST90014023	Type 1 diabetes	Type 1 diabetes || ||	TRUE	igd	17	16941853	2e-06	0.063638	8755	exposure	TRUE	reported	bi3ZwN	textfile	2	1	TRUE
rs79419269	C	T	C	T	0.325328	0.04367	0.12	0.112	FALSE	FALSE	FALSE	ebi-a-GCST90014023	7	150937076	0.058946	520580	0.459	Type 1 diabetes || id:ebi-a-GCST90014023	Type 1 diabetes	Type 1 diabetes || ||	TRUE	igd	7	151239990	5e-08	0.0629745	8755	exposure	TRUE	reported	bi3ZwN	textfile	2	1	TRUE
rs9344	G	A	G	A	0.284154	0.024983	0.56	0.551	FALSE	FALSE	FALSE	ebi-a-GCST90014023	11	69462910	0.015855	520580	0.115	Type 1 diabetes || id:ebi-a-GCST90014023	Type 1 diabetes	Type 1 diabetes || ||	TRUE	igd	11	69648142	8e-11	0.047201	8755	exposure	TRUE	reported	bi3ZwN	textfile	2	1	TRUE

## Sheet: Autoimmune hepatitis
SNP	effect_allele.exposure	other_allele.exposure	effect_allele.outcome	other_allele.outcome	beta.exposure	beta.outcome	eaf.exposure	eaf.outcome	remove	palindromic	ambiguous	id.outcome	chr	pos	se.outcome	samplesize.outcome	pval.outcome	outcome	originalname.outcome	outcome.deprecated	mr_keep.outcome	data_source.outcome	chr.exposure	pos.exposure	pval.exposure	se.exposure	samplesize.exposure	exposure	mr_keep.exposure	pval_origin.exposure	id.exposure	data_source.exposure	action	SNP_index	mr_keep
rs1005300	G	C	G	C	0.241108	-0.0226	0.59	0.5985	FALSE	TRUE	FALSE	ebi-a-GCST90018785	22	39547891	0.0762	485234	0.7668	Autoimmune hepatitis || id:ebi-a-GCST90018785	Autoimmune hepatitis	Autoimmune hepatitis || ||	TRUE	igd	22	39151886	8e-08	0.0475985	8755	exposure	TRUE	reported	bi3ZwN	textfile	2	1	TRUE
rs10799599	C	G	C	G	0.218828	0.0432	0.62	0.622772	FALSE	TRUE	FALSE	ebi-a-GCST90018785	1	20294500	0.0484	485234	0.3712	Autoimmune hepatitis || id:ebi-a-GCST90018785	Autoimmune hepatitis	Autoimmune hepatitis || ||	TRUE	igd	1	19968007	1e-06	0.0483525	8755	exposure	TRUE	reported	bi3ZwN	textfile	2	1	TRUE
rs11219122	C	T	C	T	0.211283	0.0688	0.35	0.305243	FALSE	FALSE	FALSE	ebi-a-GCST90018785	11	123240173	0.0521	485234	0.1865	Autoimmune hepatitis || id:ebi-a-GCST90018785	Autoimmune hepatitis	Autoimmune hepatitis || ||	TRUE	igd	11	123369465	2e-06	0.0468833	8755	exposure	TRUE	reported	bi3ZwN	textfile	2	1	TRUE
rs2273156	C	T	C	T	0.241108	-0.0251	0.19	0.249537	FALSE	FALSE	FALSE	ebi-a-GCST90018785	14	35438799	0.0565	485234	0.656401	Autoimmune hepatitis || id:ebi-a-GCST90018785	Autoimmune hepatitis	Autoimmune hepatitis || ||	TRUE	igd	14	34969593	3e-06	0.055159	8755	exposure	TRUE	reported	bi3ZwN	textfile	2	1	TRUE
rs35629860	A	G	A	G	0.218828	-0.0053	0.26	0.210147	FALSE	FALSE	FALSE	ebi-a-GCST90018785	16	30671532	0.0558	485234	0.9244	Autoimmune hepatitis || id:ebi-a-GCST90018785	Autoimmune hepatitis	Autoimmune hepatitis || ||	TRUE	igd	16	30660211	4e-06	0.0505805	8755	exposure	TRUE	reported	bi3ZwN	textfile	2	1	TRUE
rs4792800	G	A	G	A	0.291142	0.011	0.12	0.170263	FALSE	FALSE	FALSE	ebi-a-GCST90018785	17	16845167	0.0732	485234	0.881	Autoimmune hepatitis || id:ebi-a-GCST90018785	Autoimmune hepatitis	Autoimmune hepatitis || ||	TRUE	igd	17	16941853	2e-06	0.063638	8755	exposure	TRUE	reported	bi3ZwN	textfile	2	1	TRUE
rs79419269	C	T	C	T	0.325328	-0.0814	0.12	0.111799	FALSE	FALSE	FALSE	ebi-a-GCST90018785	7	150937076	0.1371	485234	0.5526	Autoimmune hepatitis || id:ebi-a-GCST90018785	Autoimmune hepatitis	Autoimmune hepatitis || ||	TRUE	igd	7	151239990	5e-08	0.0629745	8755	exposure	TRUE	reported	bi3ZwN	textfile	2	1	TRUE
rs9344	G	A	G	A	0.284154	-0.0353	0.56	0.538276	FALSE	FALSE	FALSE	ebi-a-GCST90018785	11	69462910	0.0474	485234	0.4574	Autoimmune hepatitis || id:ebi-a-GCST90018785	Autoimmune hepatitis	Autoimmune hepatitis || ||	TRUE	igd	11	69648142	8e-11	0.047201	8755	exposure	TRUE	reported	bi3ZwN	textfile	2	1	TRUE

## Sheet: Primary biliary cirrhosis
SNP	effect_allele.exposure	other_allele.exposure	effect_allele.outcome	other_allele.outcome	beta.exposure	beta.outcome	eaf.exposure	eaf.outcome	remove	palindromic	ambiguous	id.outcome	chr.outcome	pos.outcome	pval.outcome	se.outcome	ncase.outcome	ncontrol.outcome	outcome	mr_keep.outcome	pval_origin.outcome	samplesize.outcome	chr.exposure	pos.exposure	pval.exposure	se.exposure	samplesize.exposure	exposure	mr_keep.exposure	pval_origin.exposure	id.exposure	data_source.exposure	action	SNP_index	mr_keep
rs10799599	C	G	C	G	0.218828	0.0261148	0.62		FALSE	TRUE	TRUE	YiMzSD	1	19968007	0.219536	0.0212702	2861	8514	outcome	TRUE	reported	11375	1	19968007	1e-06	0.0483525	8755	exposure	TRUE	reported	Kagp0F	textfile	2	1	FALSE
rs11219122	C	T	C	T	0.211283	-0.00987271	0.35		FALSE	FALSE	FALSE	YiMzSD	11	123369465	0.724745	0.0280375	2861	8514	outcome	TRUE	reported	11375	11	123369465	2e-06	0.0468833	8755	exposure	TRUE	reported	Kagp0F	textfile	2	1	TRUE
rs2273156	C	T	C	T	0.241108	-0.0639672	0.19		FALSE	FALSE	FALSE	YiMzSD	14	34969593	0.0188048	0.0272273	2861	8514	outcome	TRUE	reported	11375	14	34969593	3e-06	0.055159	8755	exposure	TRUE	reported	Kagp0F	textfile	2	1	TRUE
rs4792800	G	A	G	A	0.291142	-0.0058626	0.12		FALSE	FALSE	FALSE	YiMzSD	17	16941853	0.839956	0.02903	2861	8514	outcome	TRUE	reported	11375	17	16941853	2e-06	0.063638	8755	exposure	TRUE	reported	Kagp0F	textfile	2	1	TRUE
rs79419269	C	T	C	T	0.325328	0.0271077	0.12		FALSE	FALSE	FALSE	YiMzSD	7	151239990	0.448962	0.0358025	2861	8514	outcome	TRUE	reported	11375	7	151239990	5e-08	0.0629745	8755	exposure	TRUE	reported	Kagp0F	textfile	2	1	TRUE

## Sheet: Graves' disease
SNP	effect_allele.exposure	other_allele.exposure	effect_allele.outcome	other_allele.outcome	beta.exposure	beta.outcome	eaf.exposure	eaf.outcome	remove	palindromic	ambiguous	id.outcome	chr	pos	se.outcome	samplesize.outcome	pval.outcome	outcome	originalname.outcome	outcome.deprecated	mr_keep.outcome	data_source.outcome	chr.exposure	pos.exposure	pval.exposure	se.exposure	samplesize.exposure	exposure	mr_keep.exposure	pval_origin.exposure	id.exposure	data_source.exposure	action	SNP_index	mr_keep
rs1005300	G	C	G	C	0.241108	0.0188	0.59	0.598421	FALSE	TRUE	FALSE	ebi-a-GCST90018847	22	39547891	0.0261	458620	0.4699	Graves' disease || id:ebi-a-GCST90018847	Graves' disease	Graves' disease || ||	TRUE	igd	22	39151886	8e-08	0.0475985	8755	exposure	TRUE	reported	bi3ZwN	textfile	2	1	TRUE
rs10799599	C	G	C	G	0.218828	-0.0233	0.62	0.62546	FALSE	TRUE	FALSE	ebi-a-GCST90018847	1	20294500	0.0232	458620	0.3162	Graves' disease || id:ebi-a-GCST90018847	Graves' disease	Graves' disease || ||	TRUE	igd	1	19968007	1e-06	0.0483525	8755	exposure	TRUE	reported	bi3ZwN	textfile	2	1	TRUE
rs11219122	C	T	C	T	0.211283	-0.0222	0.35	0.303543	FALSE	FALSE	FALSE	ebi-a-GCST90018847	11	123240173	0.0252	458620	0.3796	Graves' disease || id:ebi-a-GCST90018847	Graves' disease	Graves' disease || ||	TRUE	igd	11	123369465	2e-06	0.0468833	8755	exposure	TRUE	reported	bi3ZwN	textfile	2	1	TRUE
rs2273156	C	T	C	T	0.241108	-0.0201	0.19	0.253745	FALSE	FALSE	FALSE	ebi-a-GCST90018847	14	35438799	0.0236	458620	0.3942	Graves' disease || id:ebi-a-GCST90018847	Graves' disease	Graves' disease || ||	TRUE	igd	14	34969593	3e-06	0.055159	8755	exposure	TRUE	reported	bi3ZwN	textfile	2	1	TRUE
rs35629860	A	G	A	G	0.218828	0.1388	0.26	0.206349	FALSE	FALSE	FALSE	ebi-a-GCST90018847	16	30671532	0.0311	458620	8.28495e-06	Graves' disease || id:ebi-a-GCST90018847	Graves' disease	Graves' disease || ||	TRUE	igd	16	30660211	4e-06	0.0505805	8755	exposure	TRUE	reported	bi3ZwN	textfile	2	1	TRUE
rs4792800	G	A	G	A	0.291142	0.0405	0.12	0.176213	FALSE	FALSE	FALSE	ebi-a-GCST90018847	17	16845167	0.0257	458620	0.1147	Graves' disease || id:ebi-a-GCST90018847	Graves' disease	Graves' disease || ||	TRUE	igd	17	16941853	2e-06	0.063638	8755	exposure	TRUE	reported	bi3ZwN	textfile	2	1	TRUE
rs79419269	C	T	C	T	0.325328	0.008	0.12	0.111618	FALSE	FALSE	FALSE	ebi-a-GCST90018847	7	150937076	0.1062	458620	0.9399	Graves' disease || id:ebi-a-GCST90018847	Graves' disease	Graves' disease || ||	TRUE	igd	7	151239990	5e-08	0.0629745	8755	exposure	TRUE	reported	bi3ZwN	textfile	2	1	TRUE
rs9344	G	A	G	A	0.284154	-0.0265	0.56	0.537864	FALSE	FALSE	FALSE	ebi-a-GCST90018847	11	69462910	0.0219	458620	0.2257	Graves' disease || id:ebi-a-GCST90018847	Graves' disease	Graves' disease || ||	TRUE	igd	11	69648142	8e-11	0.047201	8755	exposure	TRUE	reported	bi3ZwN	textfile	2	1	TRUE

## Sheet: Hypothyroidism 
SNP	effect_allele.exposure	other_allele.exposure	effect_allele.outcome	other_allele.outcome	beta.exposure	beta.outcome	eaf.exposure	eaf.outcome	remove	palindromic	ambiguous	id.outcome	chr	pos	se.outcome	samplesize.outcome	pval.outcome	outcome	originalname.outcome	outcome.deprecated	mr_keep.outcome	data_source.outcome	proxy.outcome	target_snp.outcome	proxy_snp.outcome	target_a1.outcome	target_a2.outcome	proxy_a1.outcome	proxy_a2.outcome	chr.exposure	pos.exposure	pval.exposure	se.exposure	samplesize.exposure	exposure	mr_keep.exposure	pval_origin.exposure	id.exposure	data_source.exposure	action	SNP_index	mr_keep
rs1005300	G	C	G	C	0.241108	0.0039	0.59	0.6767	FALSE	TRUE	FALSE	finn-b-E4_HYTHY_AI_STRICT	22	39553003	0.0124		0.755	Hypothyroidism, strict autoimmune || id:finn-b-E4_HYTHY_AI_STRICT	Hypothyroidism, strict autoimmune	Hypothyroidism, strict autoimmune || ||	TRUE	igd	TRUE	rs1005300	rs139412	C	G	G	A	22	39151886	8e-08	0.0475985	8755	exposure	TRUE	reported	bi3ZwN	textfile	2	1	TRUE
rs10799599	C	G	C	G	0.218828	-0.0147	0.62	0.5615	FALSE	TRUE	TRUE	finn-b-E4_HYTHY_AI_STRICT	1	20294500	0.0117		0.2095	Hypothyroidism, strict autoimmune || id:finn-b-E4_HYTHY_AI_STRICT	Hypothyroidism, strict autoimmune	Hypothyroidism, strict autoimmune || ||	TRUE	igd								1	19968007	1e-06	0.0483525	8755	exposure	TRUE	reported	bi3ZwN	textfile	2	1	FALSE
rs11219122	C	T	C	T	0.211283	-0.0201	0.35	0.2867	FALSE	FALSE	FALSE	finn-b-E4_HYTHY_AI_STRICT	11	123240173	0.0129		0.1192	Hypothyroidism, strict autoimmune || id:finn-b-E4_HYTHY_AI_STRICT	Hypothyroidism, strict autoimmune	Hypothyroidism, strict autoimmune || ||	TRUE	igd								11	123369465	2e-06	0.0468833	8755	exposure	TRUE	reported	bi3ZwN	textfile	2	1	TRUE
rs2273156	C	T	C	T	0.241108	0.001	0.19	0.2336	FALSE	FALSE	FALSE	finn-b-E4_HYTHY_AI_STRICT	14	35438799	0.0136		0.9444	Hypothyroidism, strict autoimmune || id:finn-b-E4_HYTHY_AI_STRICT	Hypothyroidism, strict autoimmune	Hypothyroidism, strict autoimmune || ||	TRUE	igd								14	34969593	3e-06	0.055159	8755	exposure	TRUE	reported	bi3ZwN	textfile	2	1	TRUE
rs35629860	A	G	A	G	0.218828	0.0311	0.26	0.259	FALSE	FALSE	FALSE	finn-b-E4_HYTHY_AI_STRICT	16	30671532	0.0132		0.0188001	Hypothyroidism, strict autoimmune || id:finn-b-E4_HYTHY_AI_STRICT	Hypothyroidism, strict autoimmune	Hypothyroidism, strict autoimmune || ||	TRUE	igd								16	30660211	4e-06	0.0505805	8755	exposure	TRUE	reported	bi3ZwN	textfile	2	1	TRUE
rs4792800	G	A	G	A	0.291142	0.0307	0.12	0.1001	FALSE	FALSE	FALSE	finn-b-E4_HYTHY_AI_STRICT	17	16845167	0.0193		0.1109	Hypothyroidism, strict autoimmune || id:finn-b-E4_HYTHY_AI_STRICT	Hypothyroidism, strict autoimmune	Hypothyroidism, strict autoimmune || ||	TRUE	igd								17	16941853	2e-06	0.063638	8755	exposure	TRUE	reported	bi3ZwN	textfile	2	1	TRUE
rs79419269	C	T	C	T	0.325328	-0.0044	0.12	0.1159	FALSE	FALSE	FALSE	finn-b-E4_HYTHY_AI_STRICT	7	150947689	0.0181		0.8096	Hypothyroidism, strict autoimmune || id:finn-b-E4_HYTHY_AI_STRICT	Hypothyroidism, strict autoimmune	Hypothyroidism, strict autoimmune || ||	TRUE	igd	TRUE	rs79419269	rs73169671	C	T	A	C	7	151239990	5e-08	0.0629745	8755	exposure	TRUE	reported	bi3ZwN	textfile	2	1	TRUE
rs9344	G	A	G	A	0.284154	0.014	0.56	0.5244	FALSE	FALSE	FALSE	finn-b-E4_HYTHY_AI_STRICT	11	69462910	0.0116		0.2247	Hypothyroidism, strict autoimmune || id:finn-b-E4_HYTHY_AI_STRICT	Hypothyroidism, strict autoimmune	Hypothyroidism, strict autoimmune || ||	TRUE	igd								11	69648142	8e-11	0.047201	8755	exposure	TRUE	reported	bi3ZwN	textfile	2	1	TRUE

## Sheet: inflammatory bowel disease
SNP	effect_allele.exposure	other_allele.exposure	effect_allele.outcome	other_allele.outcome	beta.exposure	beta.outcome	eaf.exposure	eaf.outcome	remove	palindromic	ambiguous	id.outcome	chr	pos	se.outcome	samplesize.outcome	pval.outcome	outcome	originalname.outcome	outcome.deprecated	mr_keep.outcome	data_source.outcome	proxy.outcome	target_snp.outcome	proxy_snp.outcome	target_a1.outcome	target_a2.outcome	proxy_a1.outcome	proxy_a2.outcome	chr.exposure	pos.exposure	pval.exposure	se.exposure	samplesize.exposure	exposure	mr_keep.exposure	pval_origin.exposure	id.exposure	data_source.exposure	action	SNP_index	mr_keep
rs1005300	G	C	G	C	0.241108	-0.0203	0.59		FALSE	TRUE	TRUE	ebi-a-GCST004131	22	39553003	0.0126	59957	0.1075	Inflammatory bowel disease || id:ebi-a-GCST004131	Inflammatory bowel disease	Inflammatory bowel disease || ||	TRUE	igd	TRUE	rs1005300	rs139412	C	G	G	A	22	39151886	8e-08	0.0475985	8755	exposure	TRUE	reported	Kagp0F	textfile	2	1	FALSE
rs10799599	C	G	C	G	0.218828	0.0084	0.62		FALSE	TRUE	TRUE	ebi-a-GCST004131	1	20294500	0.0128	59957	0.5117	Inflammatory bowel disease || id:ebi-a-GCST004131	Inflammatory bowel disease	Inflammatory bowel disease || ||	TRUE	igd								1	19968007	1e-06	0.0483525	8755	exposure	TRUE	reported	Kagp0F	textfile	2	1	FALSE
rs11219122	C	T	C	T	0.211283	-0.0214	0.35		FALSE	FALSE	FALSE	ebi-a-GCST004131	11	123240173	0.013	59957	0.1001	Inflammatory bowel disease || id:ebi-a-GCST004131	Inflammatory bowel disease	Inflammatory bowel disease || ||	TRUE	igd								11	123369465	2e-06	0.0468833	8755	exposure	TRUE	reported	Kagp0F	textfile	2	1	TRUE
rs2273156	C	T	C	T	0.241108	-0.0532	0.19		FALSE	FALSE	FALSE	ebi-a-GCST004131	14	35438799	0.0159	59957	0.000840698	Inflammatory bowel disease || id:ebi-a-GCST004131	Inflammatory bowel disease	Inflammatory bowel disease || ||	TRUE	igd								14	34969593	3e-06	0.055159	8755	exposure	TRUE	reported	Kagp0F	textfile	2	1	TRUE
rs35629860	A	G	A	G	0.218828	-0.0317	0.26		FALSE	FALSE	FALSE	ebi-a-GCST004131	16	30671532	0.0143	59957	0.0261403	Inflammatory bowel disease || id:ebi-a-GCST004131	Inflammatory bowel disease	Inflammatory bowel disease || ||	TRUE	igd								16	30660211	4e-06	0.0505805	8755	exposure	TRUE	reported	Kagp0F	textfile	2	1	TRUE
rs4792800	G	A	G	A	0.291142	-0.0291	0.12		FALSE	FALSE	FALSE	ebi-a-GCST004131	17	16845167	0.0199	59957	0.1437	Inflammatory bowel disease || id:ebi-a-GCST004131	Inflammatory bowel disease	Inflammatory bowel disease || ||	TRUE	igd								17	16941853	2e-06	0.063638	8755	exposure	TRUE	reported	Kagp0F	textfile	2	1	TRUE
rs79419269	C	T	C	T	0.325328	0.0013	0.12		FALSE	FALSE	FALSE	ebi-a-GCST004131	7	150947689	0.02	59957	0.9491	Inflammatory bowel disease || id:ebi-a-GCST004131	Inflammatory bowel disease	Inflammatory bowel disease || ||	TRUE	igd	TRUE	rs79419269	rs73169671	C	T	A	C	7	151239990	5e-08	0.0629745	8755	exposure	TRUE	reported	Kagp0F	textfile	2	1	TRUE

## Sheet: Crohn's disease
SNP	effect_allele.exposure	other_allele.exposure	effect_allele.outcome	other_allele.outcome	beta.exposure	beta.outcome	eaf.exposure	eaf.outcome	remove	palindromic	ambiguous	id.outcome	chr	pos	se.outcome	samplesize.outcome	pval.outcome	outcome	originalname.outcome	outcome.deprecated	mr_keep.outcome	data_source.outcome	proxy.outcome	target_snp.outcome	proxy_snp.outcome	target_a1.outcome	target_a2.outcome	proxy_a1.outcome	proxy_a2.outcome	chr.exposure	pos.exposure	pval.exposure	se.exposure	samplesize.exposure	exposure	mr_keep.exposure	pval_origin.exposure	id.exposure	data_source.exposure	action	SNP_index	mr_keep
rs1005300	G	C	G	C	0.241108	-0.0263	0.59		FALSE	TRUE	TRUE	ebi-a-GCST004132	22	39553003	0.0162	40266	0.1056	Crohn's disease || id:ebi-a-GCST004132	Crohn's disease	Crohn's disease || ||	TRUE	igd	TRUE	rs1005300	rs139412	C	G	G	A	22	39151886	8e-08	0.0475985	8755	exposure	TRUE	reported	sIHivb	textfile	2	1	FALSE
rs10799599	C	G	C	G	0.218828	0.0213	0.62		FALSE	TRUE	TRUE	ebi-a-GCST004132	1	20294500	0.0165	40266	0.1963	Crohn's disease || id:ebi-a-GCST004132	Crohn's disease	Crohn's disease || ||	TRUE	igd								1	19968007	1e-06	0.0483525	8755	exposure	TRUE	reported	sIHivb	textfile	2	1	FALSE
rs11219122	C	T	C	T	0.211283	0.0039	0.35		FALSE	FALSE	FALSE	ebi-a-GCST004132	11	123240173	0.0167	40266	0.8165	Crohn's disease || id:ebi-a-GCST004132	Crohn's disease	Crohn's disease || ||	TRUE	igd								11	123369465	2e-06	0.0468833	8755	exposure	TRUE	reported	sIHivb	textfile	2	1	TRUE
rs2273156	C	T	C	T	0.241108	-0.0566	0.19		FALSE	FALSE	FALSE	ebi-a-GCST004132	14	35438799	0.0206	40266	0.00595196	Crohn's disease || id:ebi-a-GCST004132	Crohn's disease	Crohn's disease || ||	TRUE	igd								14	34969593	3e-06	0.055159	8755	exposure	TRUE	reported	sIHivb	textfile	2	1	TRUE
rs35629860	A	G	A	G	0.218828	-0.0475	0.26		FALSE	FALSE	FALSE	ebi-a-GCST004132	16	30671532	0.0184	40266	0.00995703	Crohn's disease || id:ebi-a-GCST004132	Crohn's disease	Crohn's disease || ||	TRUE	igd								16	30660211	4e-06	0.0505805	8755	exposure	TRUE	reported	sIHivb	textfile	2	1	TRUE
rs4792800	G	A	G	A	0.291142	-0.0048	0.12		FALSE	FALSE	FALSE	ebi-a-GCST004132	17	16845167	0.0256	40266	0.8506	Crohn's disease || id:ebi-a-GCST004132	Crohn's disease	Crohn's disease || ||	TRUE	igd								17	16941853	2e-06	0.063638	8755	exposure	TRUE	reported	sIHivb	textfile	2	1	TRUE
rs79419269	C	T	C	T	0.325328	0.0133	0.12		FALSE	FALSE	FALSE	ebi-a-GCST004132	7	150947689	0.0259	40266	0.6079	Crohn's disease || id:ebi-a-GCST004132	Crohn's disease	Crohn's disease || ||	TRUE	igd	TRUE	rs79419269	rs73169671	C	T	A	C	7	151239990	5e-08	0.0629745	8755	exposure	TRUE	reported	sIHivb	textfile	2	1	TRUE

## Sheet: Ulcerative colitis
SNP	effect_allele.exposure	other_allele.exposure	effect_allele.outcome	other_allele.outcome	beta.exposure	beta.outcome	eaf.exposure	eaf.outcome	remove	palindromic	ambiguous	id.outcome	chr	pos	se.outcome	samplesize.outcome	pval.outcome	outcome	originalname.outcome	outcome.deprecated	mr_keep.outcome	data_source.outcome	proxy.outcome	target_snp.outcome	proxy_snp.outcome	target_a1.outcome	target_a2.outcome	proxy_a1.outcome	proxy_a2.outcome	chr.exposure	pos.exposure	pval.exposure	se.exposure	samplesize.exposure	exposure	mr_keep.exposure	pval_origin.exposure	id.exposure	data_source.exposure	action	SNP_index	mr_keep
rs1005300	G	C	G	C	0.241108	-0.0125	0.59		FALSE	TRUE	TRUE	ebi-a-GCST004133	22	39553003	0.0161	45975	0.4362	Ulcerative colitis || id:ebi-a-GCST004133	Ulcerative colitis	Ulcerative colitis || ||	TRUE	igd	TRUE	rs1005300	rs139412	C	G	G	A	22	39151886	8e-08	0.0475985	8755	exposure	TRUE	reported	bi3ZwN	textfile	2	1	FALSE
rs10799599	C	G	C	G	0.218828	0.0004	0.62		FALSE	TRUE	TRUE	ebi-a-GCST004133	1	20294500	0.0163	45975	0.9805	Ulcerative colitis || id:ebi-a-GCST004133	Ulcerative colitis	Ulcerative colitis || ||	TRUE	igd								1	19968007	1e-06	0.0483525	8755	exposure	TRUE	reported	bi3ZwN	textfile	2	1	FALSE
rs11219122	C	T	C	T	0.211283	-0.0459	0.35		FALSE	FALSE	FALSE	ebi-a-GCST004133	11	123240173	0.0166	45975	0.00571597	Ulcerative colitis || id:ebi-a-GCST004133	Ulcerative colitis	Ulcerative colitis || ||	TRUE	igd								11	123369465	2e-06	0.0468833	8755	exposure	TRUE	reported	bi3ZwN	textfile	2	1	TRUE
rs2273156	C	T	C	T	0.241108	-0.0491	0.19		FALSE	FALSE	FALSE	ebi-a-GCST004133	14	35438799	0.0202	45975	0.0151199	Ulcerative colitis || id:ebi-a-GCST004133	Ulcerative colitis	Ulcerative colitis || ||	TRUE	igd								14	34969593	3e-06	0.055159	8755	exposure	TRUE	reported	bi3ZwN	textfile	2	1	TRUE
rs35629860	A	G	A	G	0.218828	-0.0213	0.26		FALSE	FALSE	FALSE	ebi-a-GCST004133	16	30671532	0.0182	45975	0.2402	Ulcerative colitis || id:ebi-a-GCST004133	Ulcerative colitis	Ulcerative colitis || ||	TRUE	igd								16	30660211	4e-06	0.0505805	8755	exposure	TRUE	reported	bi3ZwN	textfile	2	1	TRUE
rs4792800	G	A	G	A	0.291142	-0.047	0.12		FALSE	FALSE	FALSE	ebi-a-GCST004133	17	16845167	0.0254	45975	0.0637397	Ulcerative colitis || id:ebi-a-GCST004133	Ulcerative colitis	Ulcerative colitis || ||	TRUE	igd								17	16941853	2e-06	0.063638	8755	exposure	TRUE	reported	bi3ZwN	textfile	2	1	TRUE
rs79419269	C	T	C	T	0.325328	-0.0084	0.12		FALSE	FALSE	FALSE	ebi-a-GCST004133	7	150947689	0.0254	45975	0.7415	Ulcerative colitis || id:ebi-a-GCST004133	Ulcerative colitis	Ulcerative colitis || ||	TRUE	igd	TRUE	rs79419269	rs73169671	C	T	A	C	7	151239990	5e-08	0.0629745	8755	exposure	TRUE	reported	bi3ZwN	textfile	2	1	TRUE

## Sheet: Coeliac disease
SNP	effect_allele.exposure	other_allele.exposure	effect_allele.outcome	other_allele.outcome	beta.exposure	beta.outcome	eaf.exposure	eaf.outcome	remove	palindromic	ambiguous	id.outcome	chr	pos	se.outcome	samplesize.outcome	pval.outcome	outcome	originalname.outcome	outcome.deprecated	mr_keep.outcome	data_source.outcome	proxy.outcome	target_snp.outcome	proxy_snp.outcome	target_a1.outcome	target_a2.outcome	proxy_a1.outcome	proxy_a2.outcome	chr.exposure	pos.exposure	pval.exposure	se.exposure	samplesize.exposure	exposure	mr_keep.exposure	pval_origin.exposure	id.exposure	data_source.exposure	action	SNP_index	mr_keep
rs1005300	G	C	G	C	0.241108	0.0629	0.59	0.677	FALSE	TRUE	FALSE	finn-b-K11_COELIAC	22	39553003	0.0366		0.0854791	Coeliac disease || id:finn-b-K11_COELIAC	Coeliac disease	Coeliac disease || ||	TRUE	igd	TRUE	rs1005300	rs139412	C	G	G	A	22	39151886	8e-08	0.0475985	8755	exposure	TRUE	reported	bi3ZwN	textfile	2	1	TRUE
rs10799599	C	G	C	G	0.218828	0.0211	0.62	0.5616	FALSE	TRUE	TRUE	finn-b-K11_COELIAC	1	20294500	0.0345		0.539499	Coeliac disease || id:finn-b-K11_COELIAC	Coeliac disease	Coeliac disease || ||	TRUE	igd								1	19968007	1e-06	0.0483525	8755	exposure	TRUE	reported	bi3ZwN	textfile	2	1	FALSE
rs11219122	C	T	C	T	0.211283	0.027	0.35	0.287	FALSE	FALSE	FALSE	finn-b-K11_COELIAC	11	123240173	0.0377		0.4736	Coeliac disease || id:finn-b-K11_COELIAC	Coeliac disease	Coeliac disease || ||	TRUE	igd								11	123369465	2e-06	0.0468833	8755	exposure	TRUE	reported	bi3ZwN	textfile	2	1	TRUE
rs2273156	C	T	C	T	0.241108	-0.0018	0.19	0.2336	FALSE	FALSE	FALSE	finn-b-K11_COELIAC	14	35438799	0.0403		0.9634	Coeliac disease || id:finn-b-K11_COELIAC	Coeliac disease	Coeliac disease || ||	TRUE	igd								14	34969593	3e-06	0.055159	8755	exposure	TRUE	reported	bi3ZwN	textfile	2	1	TRUE
rs35629860	A	G	A	G	0.218828	0.036	0.26	0.2597	FALSE	FALSE	FALSE	finn-b-K11_COELIAC	16	30671532	0.039		0.3558	Coeliac disease || id:finn-b-K11_COELIAC	Coeliac disease	Coeliac disease || ||	TRUE	igd								16	30660211	4e-06	0.0505805	8755	exposure	TRUE	reported	bi3ZwN	textfile	2	1	TRUE
rs4792800	G	A	G	A	0.291142	0.0166	0.12	0.1	FALSE	FALSE	FALSE	finn-b-K11_COELIAC	17	16845167	0.0572		0.7722	Coeliac disease || id:finn-b-K11_COELIAC	Coeliac disease	Coeliac disease || ||	TRUE	igd								17	16941853	2e-06	0.063638	8755	exposure	TRUE	reported	bi3ZwN	textfile	2	1	TRUE
rs79419269	C	T	C	T	0.325328	0.0585	0.12	0.116	FALSE	FALSE	FALSE	finn-b-K11_COELIAC	7	150947689	0.053		0.2697	Coeliac disease || id:finn-b-K11_COELIAC	Coeliac disease	Coeliac disease || ||	TRUE	igd	TRUE	rs79419269	rs73169671	C	T	A	C	7	151239990	5e-08	0.0629745	8755	exposure	TRUE	reported	bi3ZwN	textfile	2	1	TRUE
rs9344	G	A	G	A	0.284154	0.017	0.56	0.5249	FALSE	FALSE	FALSE	finn-b-K11_COELIAC	11	69462910	0.034		0.6172	Coeliac disease || id:finn-b-K11_COELIAC	Coeliac disease	Coeliac disease || ||	TRUE	igd								11	69648142	8e-11	0.047201	8755	exposure	TRUE	reported	bi3ZwN	textfile	2	1	TRUE

[truncated: 11 more sheets: Addison's disease, Sjogren's syndrome, Systemic lupus erythematosus, Rheumatoid arthritis, Ankylosing spondylitis, Plaque psoriasis, Psoriatic arthritis, IGA Glomerulonephritis , ITP, autonomic nervous system diseas, Autoimmune diseases]
