# Supplementary material for: Causal Effects of AL Amyloidosis on Autoimmune Diseases and the Role of Inflammatory Cytokines: Insights from Mendelian Randomization
Source: Research Square preprint supplement (doi:10.21203/rs.3.rs-7503974/v1), 2025-10-15
Supplement: Supplementary file 5 [file b63b92f78b6d08b380a8dc4f.xlsx]

## Sheet: MR
Odds Ratios and Confidence Intervals in Validation Cohorts for AL Amyloidosis Across Autoimmune Diseases
Autoimmmune diseases	method	nsnp	b	se	pval	lo_ci	up_ci	or	or_lci95	or_uci95
Celiac disease	MR Egger	6	0.542324	0.50081	0.33977	-0.439264	1.52391	1.72	0.644511	4.59014
	Weighted median	6	0.144199	0.0854494	0.0915002	-0.0232818	0.31168	1.15511	0.976987	1.36572
	Inverse variance weighted	6	0.124009	0.0642379	0.0535497	-0.0018975	0.249915	1.13203	0.998104	1.28392
	Simple mode	6	0.15623	0.113208	0.226093	-0.065657	0.378116	1.16909	0.936452	1.45953
	Weighted mode	6	0.169177	0.105503	0.169722	-0.0376087	0.375962	1.18433	0.96309	1.45639
Inflammatory bowel disease	MR Egger	4	0.324831	0.53813	0.607434	-0.729903	1.37957	1.3838	0.481956	3.97317
	Weighted median	4	-0.172304	0.0725463	0.0175446	-0.314495	-0.0301133	0.841723	0.730158	0.970336
	Inverse variance weighted	4	-0.19138	0.0582557	0.00101919	-0.305561	-0.077199	0.825819	0.73671	0.925706
	Simple mode	4	-0.160976	0.0955121	0.190498	-0.34818	0.0262276	0.851312	0.705972	1.02657
	Weighted mode	4	-0.163383	0.098839	0.196897	-0.357108	0.0303412	0.849266	0.699697	1.03081
Ulcerative colitis	MR Egger	8	0.0115312	0.0159825	0.497748	-0.0197945	0.0428569	1.0116	0.9804	1.04379
	Weighted median	8	-0.00532141	0.00337763	0.115144	-0.0119416	0.00129874	0.994693	0.988129	1.0013
	Inverse variance weighted	8	-0.00589848	0.00241382	0.0145405	-0.0106296	-0.00116739	0.994119	0.989427	0.998833
	Simple mode	8	-0.00687303	0.00476614	0.192491	-0.0162147	0.0024686	0.993151	0.983916	1.00247
	Weighted mode	8	-0.00499359	0.0045213	0.305906	-0.0138553	0.00386815	0.995019	0.98624	1.00388

## Sheet: positive_ad_heter
Robustness Analysis of Validation Mendelian Randomization for AL Amyloidosis Across Three Screened Autoimmune Diseases
Outcome	Exposure	Method	Heterogeneity test			Pleiotropy test			MR-PRESSO
			Q	Q_df	Q_pval	Egger_intercept	se	pval	Global Test	pval
Coeliac disease	AL amyloidosis	Inverse variance weighted	3.99134	5	0.550664	-0.102138	0.121271	0.447068	5.58966	0.597667
Ulcerative colitis			1.18087	3	0.757596	-0.120062	0.124425	0.436383	2.23958	0.785
Inflammatory bowel disease			5.39978	7	0.611298	-0.00453476	0.00411055	0.31221	6.78008	0.661

## Sheet: HAR
Strength of Instrumental Variables in Validating Mendelian Randomization for AL Amyloidosis Across Three Screened Autoimmune Diseases
Autoimmmune diseases	SNP	Exposure					Outcome
		effect_allele.exposure	other_allele.exposure	beta.exposure	se.exposure	pval.exposure	effect_allele.outcome	other_allele.outcome	beta.outcome	se.outcome	pval.outcome
Celiac disease	rs10799599	C	G	0.218828	0.0483525	1e-06	C	G	0.0152	0.034	0.656
	rs11219122	C	T	0.211283	0.0468833	2e-06	C	T	0.0303	0.0348	0.385
	rs2273156	C	T	0.241108	0.055159	3e-06	C	T	-0.0417	0.0433	0.336
	rs35629860	A	G	0.218828	0.0505805	4e-06	A	G	0.0316	0.0383	0.409
	rs4792800	G	A	0.291141	0.063638	2e-06	G	A	0.0796	0.055	0.148
	rs9344	G	A	0.284154	0.047201	8e-11	G	A	0.0584	0.0334	0.0806
Inflammatory bowel disease	rs1005300	G	C	0.241108	0.0475985	8e-08	G	C	0.00080231	0.0017496	0.646547
	rs10799599	C	G	0.218828	0.0483525	1e-06	C	G	-0.0028362	0.0017416	0.103433
	rs11219122	C	T	0.211283	0.0468833	2e-06	C	T	-0.0017519	0.0017724	0.322924
	rs2273156	C	T	0.241108	0.055159	3e-06	C	T	-0.0022167	0.0017464	0.204338
	rs35629860	A	G	0.218828	0.0505805	4e-06	A	G	-0.0037175	0.0017801	0.0367621
	rs4792800	G	A	0.291141	0.063638	2e-06	G	A	-0.00091165	0.0017782	0.608177
	rs79419269	C	T	0.325327	0.0629745	5e-08	C	T	-0.001955	0.0017335	0.259436
	rs9344	G	A	0.284154	0.047201	8e-11	G	A	-0.00027451	0.0017475	0.875171
Ulcerative colitis	rs1005300	G	C	0.241108	0.0475985	8e-08	G	C	-0.0198026	0.0224136	0.26
	rs11219122	C	T	0.211283	0.0468833	2e-06	C	T	-0.0582689	0.0217755	0.0089
	rs2273156	C	T	0.241108	0.055159	3e-06	C	T	-0.0392207	0.0268777	0.146
	rs35629860	A	G	0.218828	0.0505805	4e-06	A	G	-0.0392207	0.0268777	0.0867002
	rs4792800	G	A	0.291141	0.063638	2e-06	G	A	-0.0295588	0.0397075	0.423
