# Supplementary material for: Causal Effects of AL Amyloidosis on Autoimmune Diseases and the Role of Inflammatory Cytokines: Insights from Mendelian Randomization
Source: Research Square preprint supplement (doi:10.21203/rs.3.rs-7503974/v1), 2025-10-15
Supplement: Supplementary file 6 [file fe305ea1ecb6130dee7ba3df.xlsx]

## Sheet: amy_open_forest
Odds Ratios and Confidence Intervals for Various Autoimmune Diseases
Autoimmune diseases	nsnp	OR	Pval	lo_ci	up_ci	se	or_lci95	or_uci95
Multiple sclerosis
MR Egger	5	1.0855	0.833819	-0.621137	0.785223	0.358766	0.537333	2.1929
Weighted median	5	0.952223	0.396974	-0.162238	0.0643259	0.057797	0.850238	1.06644
Inverse variance weighted	5	0.955625	0.379316	-0.146583	0.0558029	0.0516291	0.863654	1.05739
Simple mode	5	0.958032	0.583077	-0.183798	0.0980492	0.0718998	0.832104	1.10302
Weighted mode	5	0.957025	0.582051	-0.187897	0.100045	0.0734545	0.8287	1.10522
Type 1 diabetes
MR Egger	8	1.43855	0.391245	-0.407907	1.13518	0.393643	0.665041	3.11172
Weighted median	8	1.02933	0.531674	-0.0616727	0.11948	0.0462125	0.940191	1.12691
Inverse variance weighted	8	1.03039	0.547342	-0.0675825	0.127465	0.049757	0.934651	1.13594
Simple mode	8	1.1455	0.231636	-0.067445	0.339124	0.103716	0.934779	1.40372
Weighted mode	8	1.0809	0.341462	-0.0716246	0.227222	0.0762364	0.93088	1.25511
Autoimmune hepatitis
MR Egger	8	0.410799	0.221065	-2.16661	0.387307	0.651509	0.114566	1.47301
Weighted median	8	0.928217	0.502135	-0.29203	0.143052	0.11099	0.746746	1.15379
Inverse variance weighted	8	1.00661	0.938339	-0.160333	0.173509	0.0851637	0.85186	1.18947
Simple mode	8	0.916661	0.626868	-0.422557	0.248523	0.171194	0.655369	1.28213
Weighted mode	8	0.905922	0.537358	-0.397428	0.199823	0.15236	0.672047	1.22119
Primary biliary cirrhosis
MR Egger	4	1.53412	0.44207	-0.454273	1.31019	0.450119	0.634909	3.70688
Weighted median	4	0.974026	0.725136	-0.173021	0.120387	0.0748491	0.84112	1.12793
Inverse variance weighted	4	0.943238	0.427075	-0.20265	0.0857772	0.0735784	0.816564	1.08956
Simple mode	4	0.984037	0.88161	-0.210795	0.178612	0.0993384	0.80994	1.19556
Weighted mode	4	0.989778	0.918283	-0.190931	0.170382	0.0921718	0.826189	1.18576
Grave's disease
MR Egger	8	0.929931	0.9133	-1.3266	1.18131	0.639771	0.265379	3.25863
Weighted median	8	0.917155	0.102661	-0.190334	0.0173749	0.0529869	0.826683	1.01753
Inverse variance weighted	8	1.02134	0.773624	-0.122788	0.165025	0.0734217	0.884451	1.17942
Simple mode	8	0.917106	0.256588	-0.223836	0.0507714	0.0700528	0.799446	1.05208
Weighted mode	8	0.910966	0.184296	-0.217349	0.0308491	0.0633157	0.804649	1.03133
Hypothyroidism
MR Egger	7	1.09646	0.67577	-0.314649	0.49882	0.207517	0.730045	1.64678
Weighted median	7	1.0204	0.495634	-0.0378877	0.0782682	0.0296316	0.962821	1.08141
Inverse variance weighted	7	1.02983	0.267581	-0.0225753	0.0813714	0.026517	0.977678	1.08477
Simple mode	7	1.01009	0.826958	-0.0761068	0.0961789	0.0439504	0.926717	1.10096
Weighted mode	7	1.01919	0.62772	-0.0539246	0.0919405	0.0372105	0.947504	1.0963
inflammatory bowel disease
MR Egger	5	1.18216	0.479658	-0.240054	0.574746	0.207857	0.786585	1.77668
Weighted median	5	0.904037	0.0173357	-0.183984	-0.0177862	0.0423974	0.831949	0.982371
Inverse variance weighted	5	0.896583	0.00310565	-0.18152	-0.0368086	0.0369163	0.834001	0.963861
Simple mode	5	0.891901	0.137296	-0.235318	0.00651807	0.0616929	0.790319	1.00654
Weighted mode	5	0.895241	0.14845	-0.232031	0.0107059	0.0619226	0.792922	1.01076
Crohn's disease
MR Egger	5	1.27543	0.569621	-0.505718	0.992281	0.382143	0.603072	2.69738
Weighted median	5	0.997237	0.958925	-0.108045	0.102512	0.0537137	0.897587	1.10795
Inverse variance weighted	5	0.926253	0.198629	-0.193415	0.0401991	0.0595955	0.82414	1.04102
Simple mode	5	1.01572	0.84442	-0.130471	0.161672	0.0745264	0.877682	1.17547
Weighted mode	5	1.01693	0.78938	-0.0984533	0.132036	0.0587983	0.906238	1.14115
Ulcerative colitis
MR Egger	5	1.15589	0.567712	-0.298821	0.58857	0.226375	0.741692	1.80141
Weighted median	5	0.866835	0.00623668	-0.245316	-0.0404971	0.0522496	0.782458	0.960312
Inverse variance weighted	5	0.869945	0.00014536	-0.21121	-0.0674415	0.0366756	0.809604	0.934782
Simple mode	5	0.831101	0.0662818	-0.329653	-0.0403556	0.0738004	0.719173	0.960448
Weighted mode	5	0.833558	0.0820162	-0.336509	-0.0275956	0.0788044	0.71426	0.972782
Coeliac disease
MR Egger	7	1.0233	0.959666	-0.826083	0.87214	0.43322	0.43776	2.39202
Weighted median	7	1.11649	0.135193	-0.0343759	0.254754	0.0737576	0.966208	1.29014
Inverse variance weighted	7	1.12593	0.0489835	0.000526282	0.23669	0.0602459	1.00053	1.26705
Simple mode	7	1.13709	0.283401	-0.0852836	0.34222	0.109057	0.918252	1.40807
Weighted mode	7	1.0773	0.511918	-0.134928	0.283835	0.106827	0.873779	1.32821
Addison's disease
MR Egger	6	1.3593	0.719322	-1.25277	1.86672	0.795788	0.285712	6.46703
Weighted median	6	1.11089	0.378797	-0.129028	0.339346	0.119483	0.878949	1.40403
Inverse variance weighted	6	1.02952	0.756981	-0.155151	0.213327	0.0939995	0.856286	1.23779
Simple mode	6	1.11874	0.50671	-0.195467	0.419879	0.156976	0.822451	1.52178
Weighted mode	6	1.13644	0.404898	-0.147792	0.403588	0.140658	0.862611	1.49719
Sjogren's syndrome
MR Egger	6	3.91234	0.222917	-0.490798	3.21907	0.946395	0.612138	25.0048
Weighted median	6	0.998708	0.994662	-0.380146	0.377559	0.193292	0.683762	1.45872
Inverse variance weighted	6	1.03894	0.790607	-0.243779	0.320178	0.143867	0.783661	1.37737
Simple mode	6	0.841261	0.581595	-0.748257	0.402551	0.293573	0.473191	1.49564
Weighted mode	6	0.841261	0.613508	-0.802315	0.456609	0.321154	0.44829	1.57871
Systemic lupus erythematosus
MR Egger	5	1.02726	0.951006	-0.763175	0.81696	0.403095	0.466184	2.26361
Weighted median	5	1.07534	0.348443	-0.0792003	0.224467	0.0774662	0.923855	1.25166
Inverse variance weighted	5	1.12277	0.0639467	-0.00671655	0.23832	0.0625093	0.993306	1.26912
Simple mode	5	1.0686	0.558402	-0.137619	0.270327	0.104068	0.871431	1.31039
Weighted mode	5	1.06207	0.577946	-0.134939	0.255379	0.099571	0.873769	1.29095
Rheumatoid arthritis
MR Egger	8	0.989041	0.969019	-0.544462	0.522424	0.272165	0.580154	1.68611
Weighted median	8	0.990444	0.774646	-0.0753388	0.0561341	0.033539	0.927429	1.05774
Inverse variance weighted	8	1.00625	0.848087	-0.0574736	0.0699248	0.0324996	0.944147	1.07243
Simple mode	8	0.951588	0.430745	-0.165959	0.066713	0.059355	0.847081	1.06899
Weighted mode	8	0.973798	0.562738	-0.112224	0.059121	0.0437105	0.893844	1.0609
Ankylosing spondylitis
MR Egger	3	0.794822	0.281605	-0.442821	-0.0164534	0.108767	0.642222	0.983681
Weighted median	3	1.0031	0.861091	-0.0316098	0.0378072	0.0177084	0.968885	1.03853
Inverse variance weighted	3	1.01078	0.59888	-0.0292298	0.0506739	0.0203836	0.971193	1.05198
Simple mode	3	0.998326	0.952599	-0.0506209	0.0472692	0.024972	0.950639	1.0484
Weighted mode	3	0.997	0.900538	-0.0446617	0.0386528	0.0212537	0.956321	1.03941
Plaque psoriasis
MR Egger	6	1.03271	0.953839	-0.991998	1.05637	0.522543	0.370835	2.87592
Weighted median	6	0.907278	0.235507	-0.258076	0.0634639	0.0820255	0.772536	1.06552
Inverse variance weighted	6	0.948153	0.427015	-0.184609	0.0781309	0.0670255	0.831429	1.08126
Simple mode	6	0.880248	0.334677	-0.361811	0.106708	0.11952	0.696414	1.11261
Weighted mode	6	0.891843	0.328941	-0.321952	0.0930214	0.105861	0.724733	1.09749
Psoriatic arthritis
MR Egger	8	0.989099	0.979712	-0.821414	0.799492	0.413497	0.439809	2.22441
Weighted median	8	1.00623	0.909353	-0.100639	0.113052	0.0545129	0.90426	1.11969
Inverse variance weighted	8	1.09525	0.088306	-0.0136447	0.195619	0.0533836	0.986448	1.21606
Simple mode	8	0.983872	0.846932	-0.175357	0.142837	0.081172	0.839158	1.15354
Weighted mode	8	0.981148	0.820956	-0.177787	0.139723	0.0809976	0.83712	1.14996
IGA Glomerulonephritis
MR Egger	8	1.02906	0.866784	-0.292055	0.349346	0.163623	0.746727	1.41814
Weighted median	8	0.988412	0.640387	-0.0605594	0.0372475	0.0249507	0.941238	1.03795
Inverse variance weighted	8	0.983221	0.423391	-0.0583486	0.0245068	0.0211366	0.943321	1.02481
Simple mode	8	0.976041	0.513818	-0.0933734	0.0448724	0.0352668	0.910853	1.04589
Weighted mode	8	0.979962	0.584802	-0.0895215	0.049039	0.0353471	0.914369	1.05026
Idiopathic Thrombocytopenic Purpura
MR Egger	8	1.05087	0.945926	-1.32579	1.42503	0.701742	0.265592	4.158
Weighted median	8	1.13396	0.26972	-0.0975321	0.348957	0.1139	0.907073	1.41759
Inverse variance weighted	8	1.06203	0.484861	-0.108682	0.22904	0.0861535	0.897015	1.25739
Simple mode	8	1.19849	0.273585	-0.11767	0.479803	0.152417	0.888989	1.61576
Weighted mode	8	1.20172	0.251148	-0.104157	0.471661	0.146892	0.901084	1.60265
autonomic nervous system disease
MR Egger	6	0.0533505	0.088889	-5.49849	-0.36325	1.31001	0.00409293	0.695413
Weighted median	6	0.769487	0.254811	-0.713039	0.188977	0.230106	0.490152	1.20801
Inverse variance weighted	6	1.02234	0.91951	-0.406438	0.450625	0.218639	0.666018	1.56929
Simple mode	6	0.758572	0.408089	-0.876308	0.323673	0.306117	0.416317	1.38219
Weighted mode	6	0.739974	0.346111	-0.868825	0.266545	0.289635	0.419444	1.30545
Autoimmune diseases
MR Egger	7	1.029	0.84747	-0.248077	0.30526	0.141157	0.7803	1.35698
Weighted median	7	1.0408	0.0623915	-0.0020706	0.0820436	0.0214577	0.997932	1.0855
Inverse variance weighted	7	1.03662	0.0446535	0.000858038	0.0710721	0.0179117	1.00086	1.07366
Simple mode	7	1.03615	0.31306	-0.0277037	0.0987331	0.0322543	0.972677	1.10377
Weighted mode	7	1.04048	0.221944	-0.0173987	0.0967608	0.0291223	0.982752	1.1016
nsnp: Represents the number of single nucleotide polymorphisms (SNPs) analyzed in the study. OR (Odds Ratio): Represents the odds of having an autoimmune disease occurring in one group compared to another. An OR > 1 indicates an increased risk, while an OR < 1 suggests a decreased risk. Pval: Refers to the P-value, A P values < 0.05 indicates stronger evidence against the null hypothesis. lo_ci: …
